# Supplementary material
Source: PubMed Central journal article supplement (PMC3045630)

# **CHEMISTRY**

---

## **A EUROPEAN JOURNAL**

---

### Supporting Information

© Copyright Wiley-VCH Verlag GmbH & Co. KGaA, 69451 Weinheim, 2010

#### **Diversity Through a Branched Reaction Pathway: Generation of Multicyclic Scaffolds and Identification of Antimigratory Agents**

**Zhiming Wang,<sup>[a, c]</sup> Sabrina Castellano,<sup>[a]</sup> Sape S. Kinderman,<sup>[a]</sup> Christian E. Argueta,<sup>[b]</sup>  
Anwar B. Beshir,<sup>[b]</sup> Gabriel Fenteany,<sup>\*[b]</sup> and Ohyun Kwon<sup>\*[a]</sup>**

chem\_201002195\_sm\_miscellaneous\_information.pdf

## Contents

|                                                                                                                                                                                                                                    |     |
|------------------------------------------------------------------------------------------------------------------------------------------------------------------------------------------------------------------------------------|-----|
| General Information                                                                                                                                                                                                                | S2  |
| General Procedure for the Synthesis of Dienes <b>5</b> and <b>6</b>                                                                                                                                                                | S3  |
| Structures of 16 Dienes                                                                                                                                                                                                            | S5  |
| Structures of 12 Dienophiles                                                                                                                                                                                                       | S5  |
| Structures of 91 Multicyclic Heterocycles ( <b>7–18</b> )                                                                                                                                                                          | S6  |
| General Procedure for the Synthesis of <b>7</b>                                                                                                                                                                                    | S10 |
| General Procedure for the Synthesis of <b>8</b>                                                                                                                                                                                    | S14 |
| General Procedure for the Synthesis of <b>9</b>                                                                                                                                                                                    | S20 |
| General Procedure for the Synthesis of <b>10</b>                                                                                                                                                                                   | S23 |
| General Procedure for the Synthesis of <b>11</b>                                                                                                                                                                                   | S26 |
| General Procedure for the Synthesis of <b>12</b>                                                                                                                                                                                   | S32 |
| General Procedure for the Synthesis of <b>13</b>                                                                                                                                                                                   | S35 |
| General Procedure for the Synthesis of <b>14</b>                                                                                                                                                                                   | S38 |
| General Procedure for the Synthesis of <b>15</b>                                                                                                                                                                                   | S41 |
| General Procedure for the Synthesis of <b>16–18</b>                                                                                                                                                                                | S46 |
| Crystallographic Data for <b>7d</b> , <b>8a</b> , <b>9a</b> , <b>10a</b> , <b>11aa</b> , <b>11ab</b> ,<br><b>12a</b> , <b>13a</b> , <b>14a</b> , <b>14c'</b> , <b>15a</b> , <b>16b</b> , <b>17cb</b> , <b>17d</b> , and <b>18a</b> | S59 |
| <sup>1</sup> H and <sup>13</sup> C NMR Spectra for <b>5b</b> , <b>6a</b> , <b>6c</b> , <b>6e</b> , and <b>7–18</b>                                                                                                                 | S60 |

## General Information

All reactions were performed under Ar atmospheres in oven-dried glassware with dry solvents and anhydrous conditions. Unless otherwise stated, all reagents were purchased from commercial suppliers and used without further purification. Toluene, dichloromethane (DCM), and MeOH were freshly distilled from CaH<sub>2</sub>. THF was distilled from sodium benzophenone ketyl prior to use. Organic solutions were concentrated under reduced pressure on a rotary evaporator or an oil pump. All ethyl allenates (**1** and **2**), dihydropyrroline esters (**3**), and tetrahydropyridine esters (**4**) were synthesized according to procedures reported previously.<sup>1</sup> Tebbe reagent (*ca.* 1.0 M in toluene) was synthesized according to the procedure reported by Grubbs.<sup>2</sup> Reactions were monitored using thin layer chromatography (TLC) on silica gel–precoated glass plates (0.25 mm thickness, SiliCycle silica gel). Chromatograms were visualized through fluorescence quenching with UV light at 254 nm. Flash column chromatography was performed using SiliCycle Silica-P Flash silica gel (60 Å pore size, 40–63 µm). Infrared spectra were recorded using a Perkin–Elmer Spectrum One FT-IR spectrometer. <sup>1</sup>H and <sup>13</sup>C NMR spectra were recorded in CDCl<sub>3</sub> on Bruker Avance 500, ARX-500, or ARX-400 spectrometers, as indicated. Chemical shifts (δ, ppm) are provided relative to tetramethylsilane (TMS), with the resonance of the undeuterated solvent or TMS as the internal standard. <sup>1</sup>H NMR spectral data are reported as follows: chemical shift, multiplicity (s = singlet; d = doublet; t = triplet; q = quartet; m = multiplet), coupling constant(s) (Hz), integration. <sup>13</sup>C NMR spectral data are reported in terms of chemical shift. MALDI mass spectra were obtained with an AB/PerSpective DE-STR TOF instrument, with samples dissolved in CH<sub>3</sub>CN and using 2,5-dihydroxybenzoic acid or 1,8,9-anthracenetriol as the matrix. X-ray crystallographic data were collected using a Bruker SMART CCD-based diffractometer equipped with a low-temperature apparatus operated at 100 K. Melting points (m.p.) were measured using an electrothermal capillary melting point apparatus; they are uncorrected.

- 
- [1] a) Z. Xu and X. Lu, *Tetrahedron Lett.* **1997**, *38*, 3461–3464; b) Z. Xu and X. Lu, *J. Org. Chem.* **1998**, *63*, 5031–5041; c) X.-F. Zhu, J. Lan and O. Kwon, *J. Am. Chem. Soc.* **2003**, *125*, 4716–4717; d) X.-F. Zhu, C. E. Henry and O. Kwon, *Tetrahedron* **2005**, *61*, 6276–6282; e) K. Lu and O. Kwon, *Org. Synth.* **2009**, *86*, 212–224.  
[2] L. F. Cannizzo and R. H. Grubbs, *J. Org. Chem.* **1985**, *50*, 2386–2387.

## General Procedure for the Synthesis of Dienes 5 and 6

Tebbe reagent (ca. 1.0 M in toluene, 3.0 eq.) was added dropwise over 10 min to a solution of an ester (**3** or **4**, 1.0 mmol) and anhydrous pyridine (0.3 eq.) in dry THF (10 mL) at  $-78\text{ }^{\circ}\text{C}$  (acetone/dry ice). The reddish mixture was stirred overnight at room temperature, allowing the cooling bath to gradually warm through evaporation of the dry ice. Aqueous NaOH (15%, 0.5 mL) was added dropwise at  $-78\text{ }^{\circ}\text{C}$  (acetone/dry ice), causing the evolution of  $\text{CH}_4$ . After 1 h, THF (10 mL) was added to the reaction mixture, which was then stirred for another 4 h at room temperature. The organic solution was filtered through a Celite pad and the filtrate concentrated. The crude residue was purified through flash column chromatography ( $\text{SiO}_2$ ; 10–25% EtOAc and 1%  $\text{Et}_3\text{N}$  in hexanes) to afford the diene.

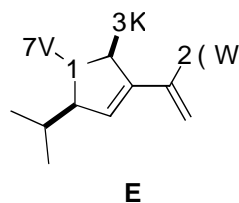

**5b**: 73% yield; solid; IR (film)  $\nu_{\text{max}}$  3064, 2963, 2930, 1733, 1597, 1346, 1164, 665  $\text{cm}^{-1}$ ;  $^1\text{H}$  NMR (500 MHz,  $\text{CDCl}_3$ )  $\delta$  7.58 (d,  $J = 8.3$  Hz, 2H), 7.46–7.44 (m, 2H), 7.31–7.25 (m, 3H), 7.20 (d,  $J = 8.3$  Hz, 2H), 6.15 (s, 1H), 5.68 (s, 1H), 4.38–4.37 (m, 1H), 4.00 (d,  $J = 2.6$  Hz, 1H), 3.74 (d,  $J = 2.6$  Hz, 1H), 3.69–3.59 (m, 2H), 2.37 (s, 3H), 2.04–1.98 (m, 1H), 1.25 (t,  $J = 7.0$  Hz, 3H), 1.02 (d,  $J = 6.9$  Hz, 3H), 0.86 (d,  $J = 6.7$  Hz, 3H);  $^{13}\text{C}$  NMR (125 MHz,  $\text{CDCl}_3$ )  $\delta$  153.9, 143.2, 140.4, 136.7, 135.5, 129.4, 128.8, 128.0, 127.7, 127.5, 125.2, 87.1, 73.2, 69.5, 62.6, 32.9, 21.4, 20.2, 18.0, 14.2; MS (MALDI) calcd. for  $\text{C}_{24}\text{H}_{30}\text{NO}_3\text{S}$  [ $\text{M} + \text{H}$ ] $^+$  412.19, found 412.24.

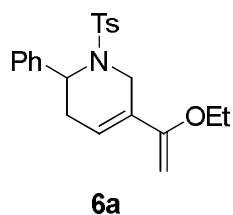

**6a**: 82% yield; oil; IR (film)  $\nu_{\text{max}}$  3062, 2978, 2927, 1597, 1340, 1161, 694  $\text{cm}^{-1}$ ;  $^1\text{H}$  NMR (400 MHz,  $\text{CDCl}_3$ )  $\delta$  7.68 (d,  $J = 8.3$  Hz, 2H), 7.35–7.22 (m, 7H), 6.27–6.26 (m, 1H), 5.28 (d,  $J = 6.7$  Hz, 1H), 4.33 (d,  $J = 17.5$  Hz, 1H), 3.99 (dd,  $J = 6.9, 2.8$  Hz, 2H), 3.73 (qd,  $J = 7.0, 1.5$  Hz, 2H), 3.47–3.40 (m, 1H), 2.53 (dd,  $J = 19.6, 5.3$  Hz, 1H), 2.44–2.37 (m, 4H), 1.31 (t,  $J = 7.0$  Hz, 3H);

$^{13}\text{C}$  NMR (100 MHz,  $\text{CDCl}_3$ )  $\delta$  157.2, 143.1, 138.9, 137.7, 129.6, 129.4, 128.4, 127.5, 127.4, 127.0, 120.9, 81.8, 62.8, 52.5, 40.1, 26.2, 21.5, 14.4; MS (MALDI) calcd. for  $\text{C}_{22}\text{H}_{26}\text{NO}_3\text{S}$  [ $\text{M} + \text{H}$ ] $^+$  384.16, found 384.09.

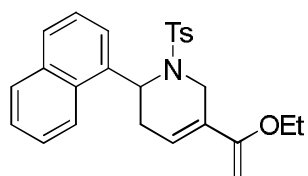

**6c**

**6c**: 80% yield; solid; IR (film)  $\nu_{\text{max}}$  3051, 2979, 2926, 1597, 1339, 1158, 690  $\text{cm}^{-1}$ ;  $^1\text{H}$  NMR (500 MHz, acetone- $d_6$ )  $\delta$  8.69 (d,  $J = 8.6$  Hz, 1H), 7.91 (d,  $J = 7.9$  Hz, 1H), 7.85 (dd,  $J = 7.4, 1.7$  Hz, 1H), 7.75 (d,  $J = 8.3$  Hz, 2H), 7.61–7.58 (m, 1H), 7.54–7.51 (m, 1H), 7.40–7.35 (m, 2H), 7.32 (d,  $J = 8.0$  Hz, 2H), 6.17 (t,  $J = 2.5$  Hz, 1H), 6.07 (d,  $J = 6.7$  Hz, 1H), 4.23 (d,  $J = 18.1$  Hz, 1H), 4.04 (s, 2H), 3.74 (q,  $J = 7.0$  Hz, 2H), 3.23 (ddd,  $J = 18.1, 5.9, 2.8$  Hz, 1H), 2.66–2.54 (m, 2H), 2.39 (s, 3H), 1.26 (t,  $J = 7.0$  Hz, 3H);  $^{13}\text{C}$  NMR (125 MHz, acetone- $d_6$ )  $\delta$  157.5, 143.4, 137.5, 134.3, 134.1, 131.4, 129.3, 129.2, 128.8, 128.6, 127.3, 126.2, 125.6, 124.7, 124.4, 124.2, 121.8, 81.4, 62.4, 49.7, 40.1, 26.2, 20.4, 13.7; MS (MALDI) calcd. for  $\text{C}_{26}\text{H}_{28}\text{NO}_3\text{S}$  [ $\text{M} + \text{H}$ ] $^+$  434.18, found 434.24.

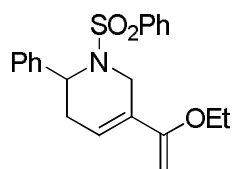

**6e**

**6e**: 80% yield; solid; IR (film)  $\nu_{\text{max}}$  3062, 2979, 2900, 1666, 1589, 1342, 1162, 691  $\text{cm}^{-1}$ ;  $^1\text{H}$  NMR (400 MHz, acetone- $d_6$ )  $\delta$  7.85 (d,  $J = 7.8$  Hz, 2H), 7.62 (t,  $J = 7.3$  Hz, 1H), 7.54 (t,  $J = 7.3$  Hz, 2H), 7.32–7.23 (m, 5H), 6.23 (d,  $J = 4.4$  Hz, 1H), 5.31 (d,  $J = 6.8$  Hz, 1H), 4.32 (d,  $J = 17.7$  Hz, 1H), 4.04 (d,  $J = 16.2$  Hz, 2H), 3.70 (q,  $J = 6.9$  Hz, 2H), 3.40 (d,  $J = 17.7$  Hz, 1H), 2.61 (dd,  $J = 18.9, 6.8$  Hz, 1H), 2.39 (dd,  $J = 18.9, 4.4$  Hz, 1H), 1.23 (t,  $J = 6.9$  Hz, 3H);  $^{13}\text{C}$  NMR (100 MHz, acetone- $d_6$ )  $\delta$  157.2, 141.0, 139.2, 132.6, 129.2, 129.1, 128.4, 127.4, 127.2, 126.8, 121.2, 81.4, 62.5, 52.5, 39.9, 25.9, 13.8; MS (MALDI) calcd. for  $\text{C}_{21}\text{H}_{24}\text{NO}_3\text{S}$  [ $\text{M} + \text{H}$ ] $^+$  370.15, found 370.18.

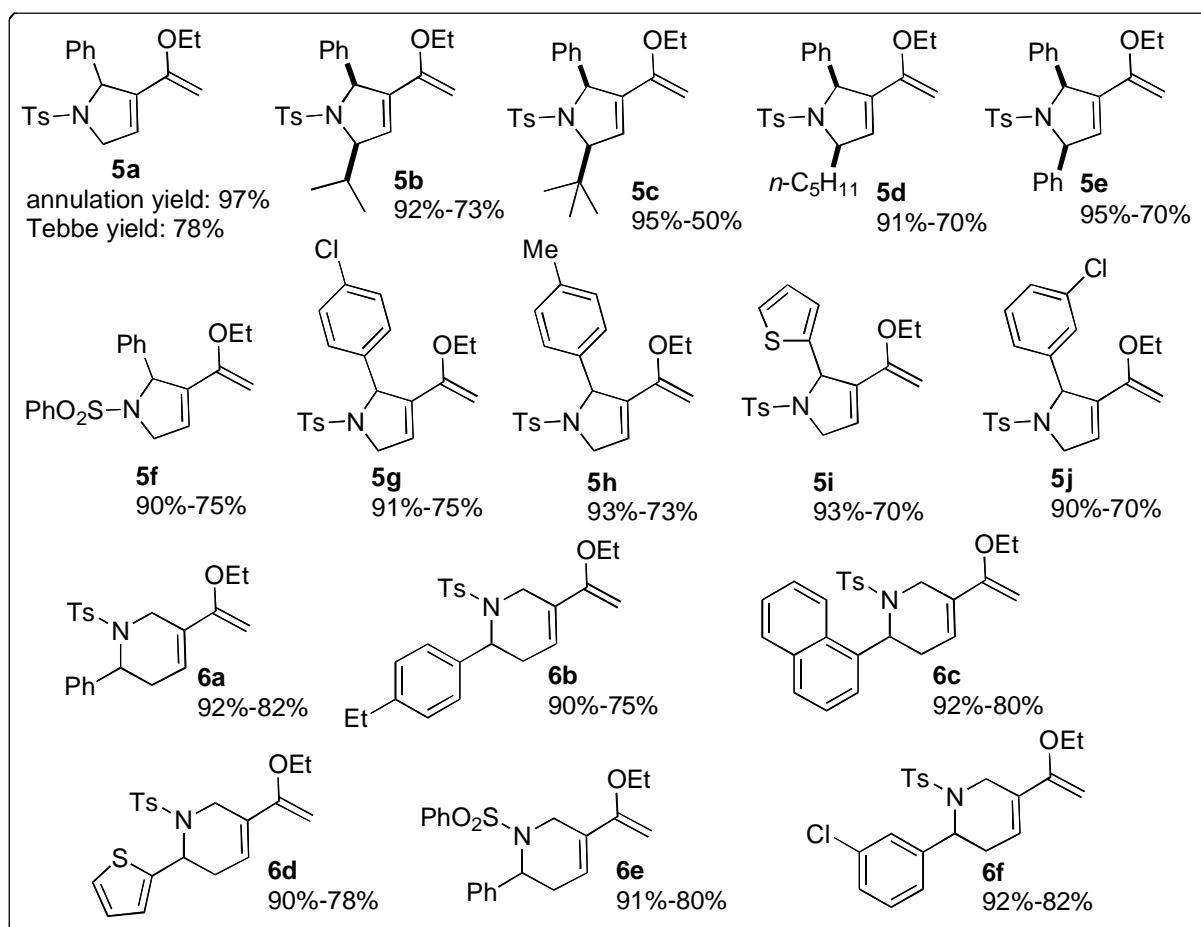

**Figure S1.** Structures of the Sixteen Dienes and the Yields for Their Formation

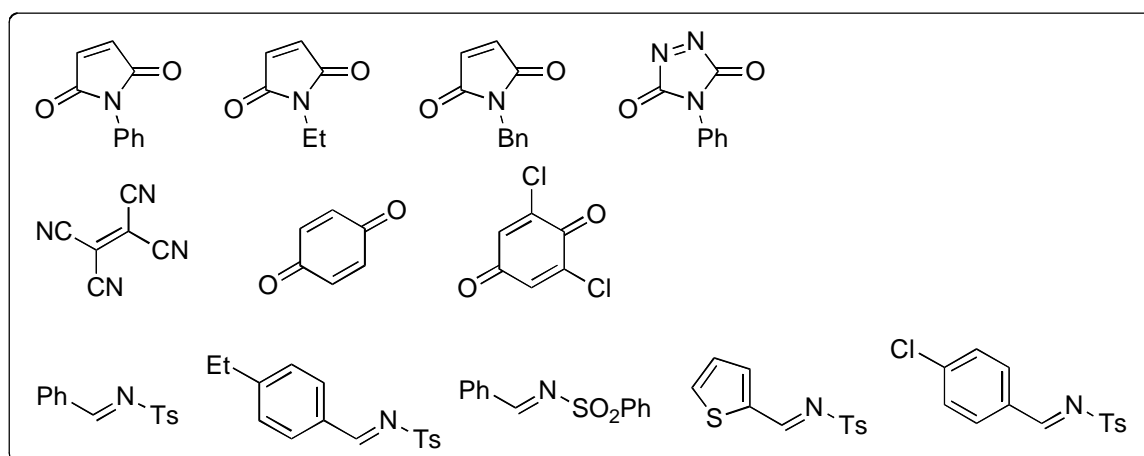

**Figure S2.** Structures of the Twelve Dienophiles

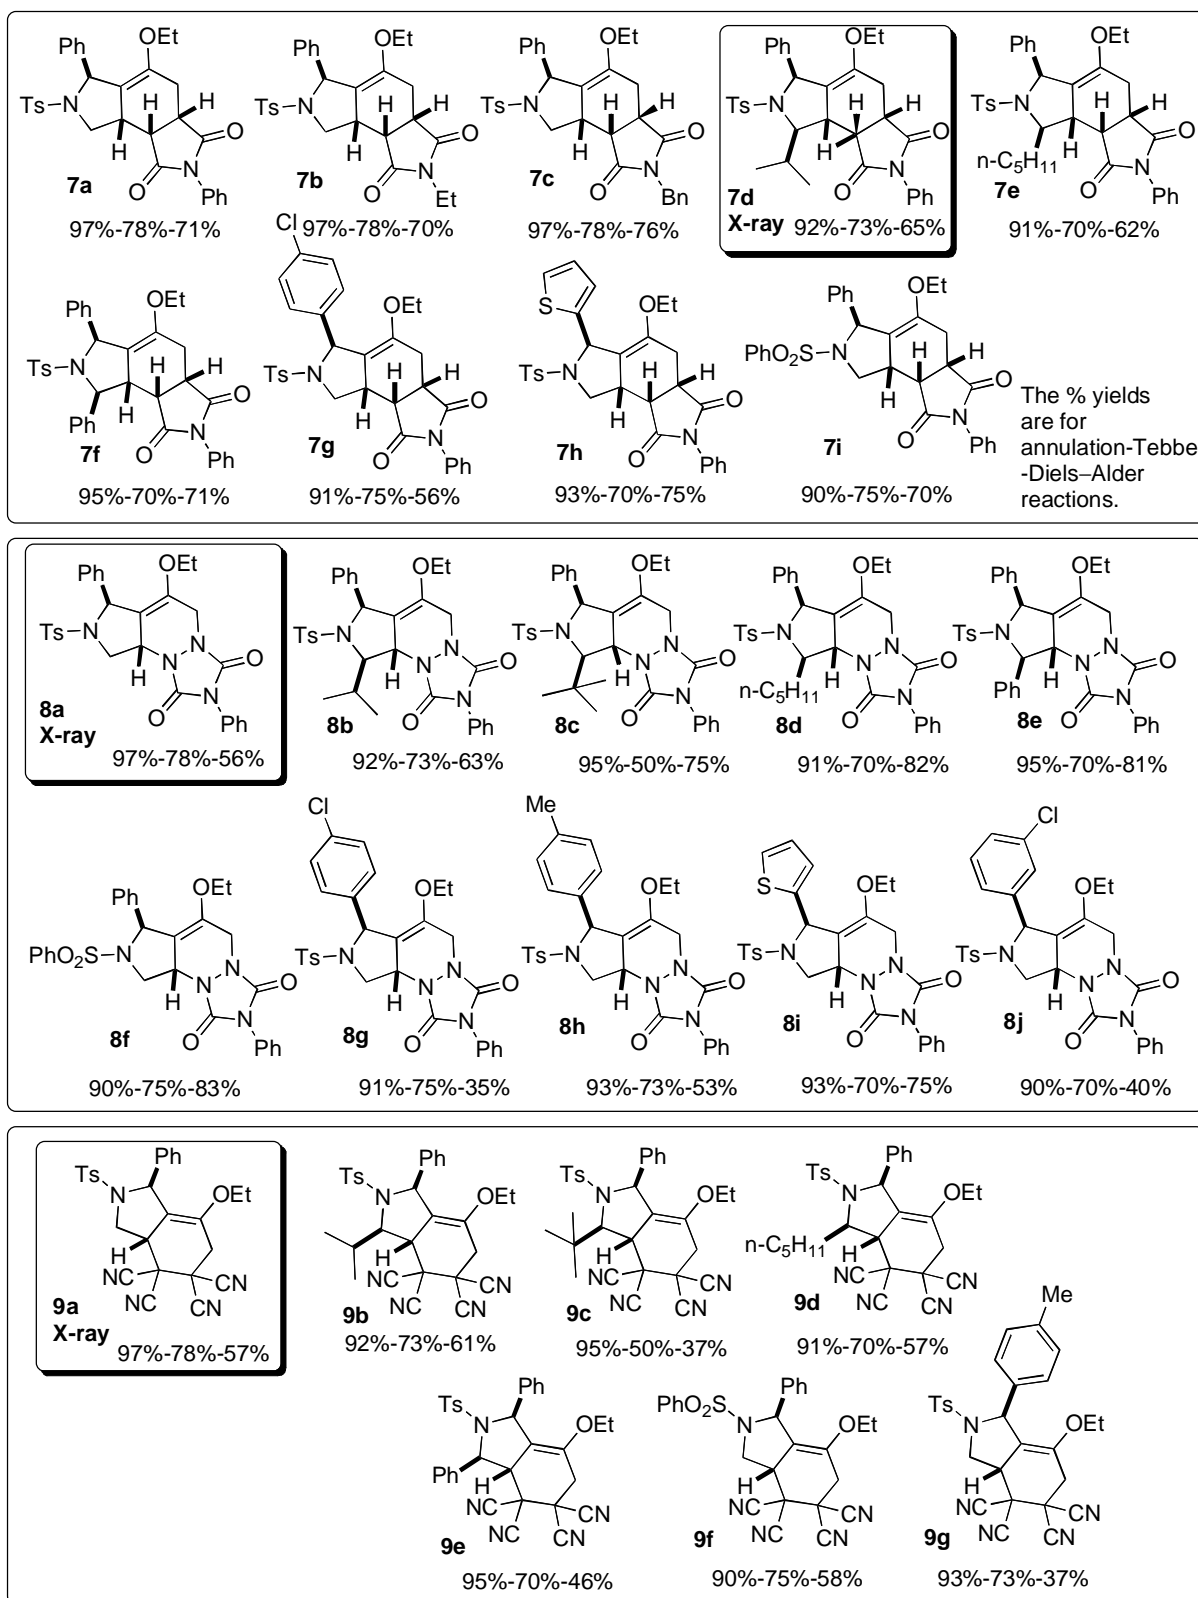

**Figure S3.** Structures of the Ninety-One Library Compounds and the Yields for Their Formation

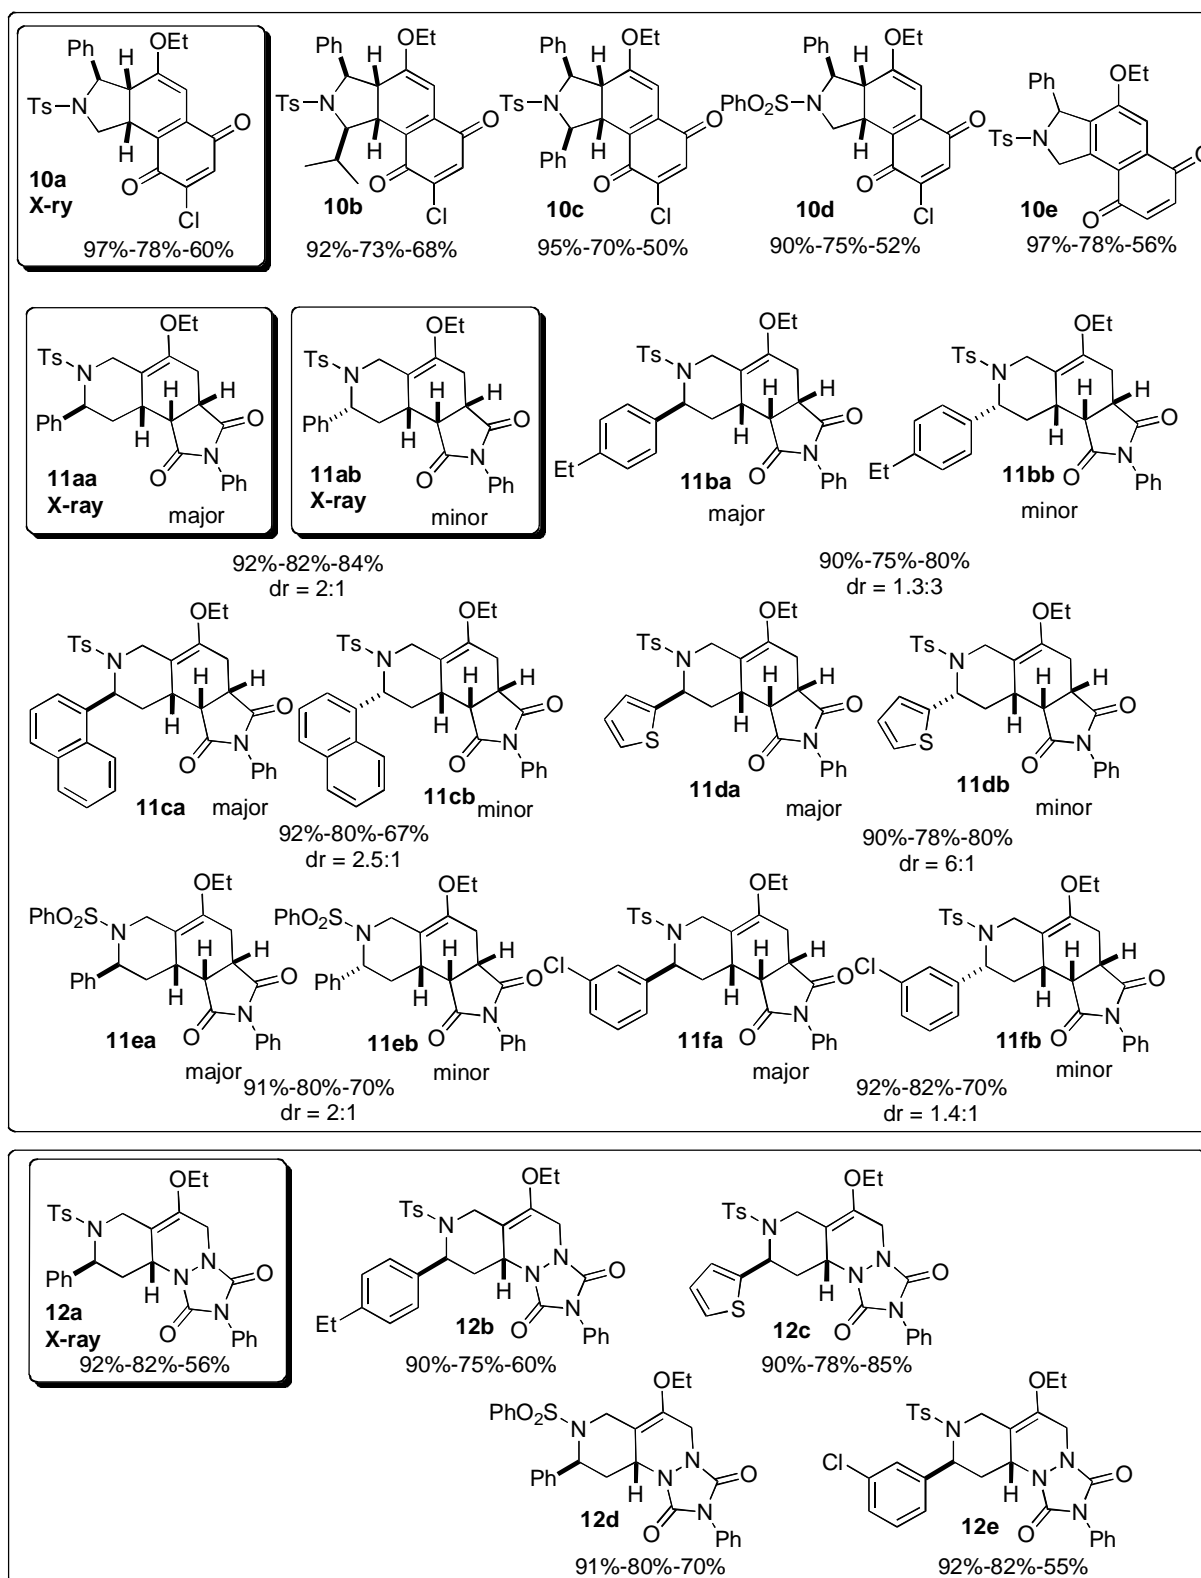

**Figure S3.** Structures of the Ninety-One Library Compounds and the Yields for Their Formation (Continued)



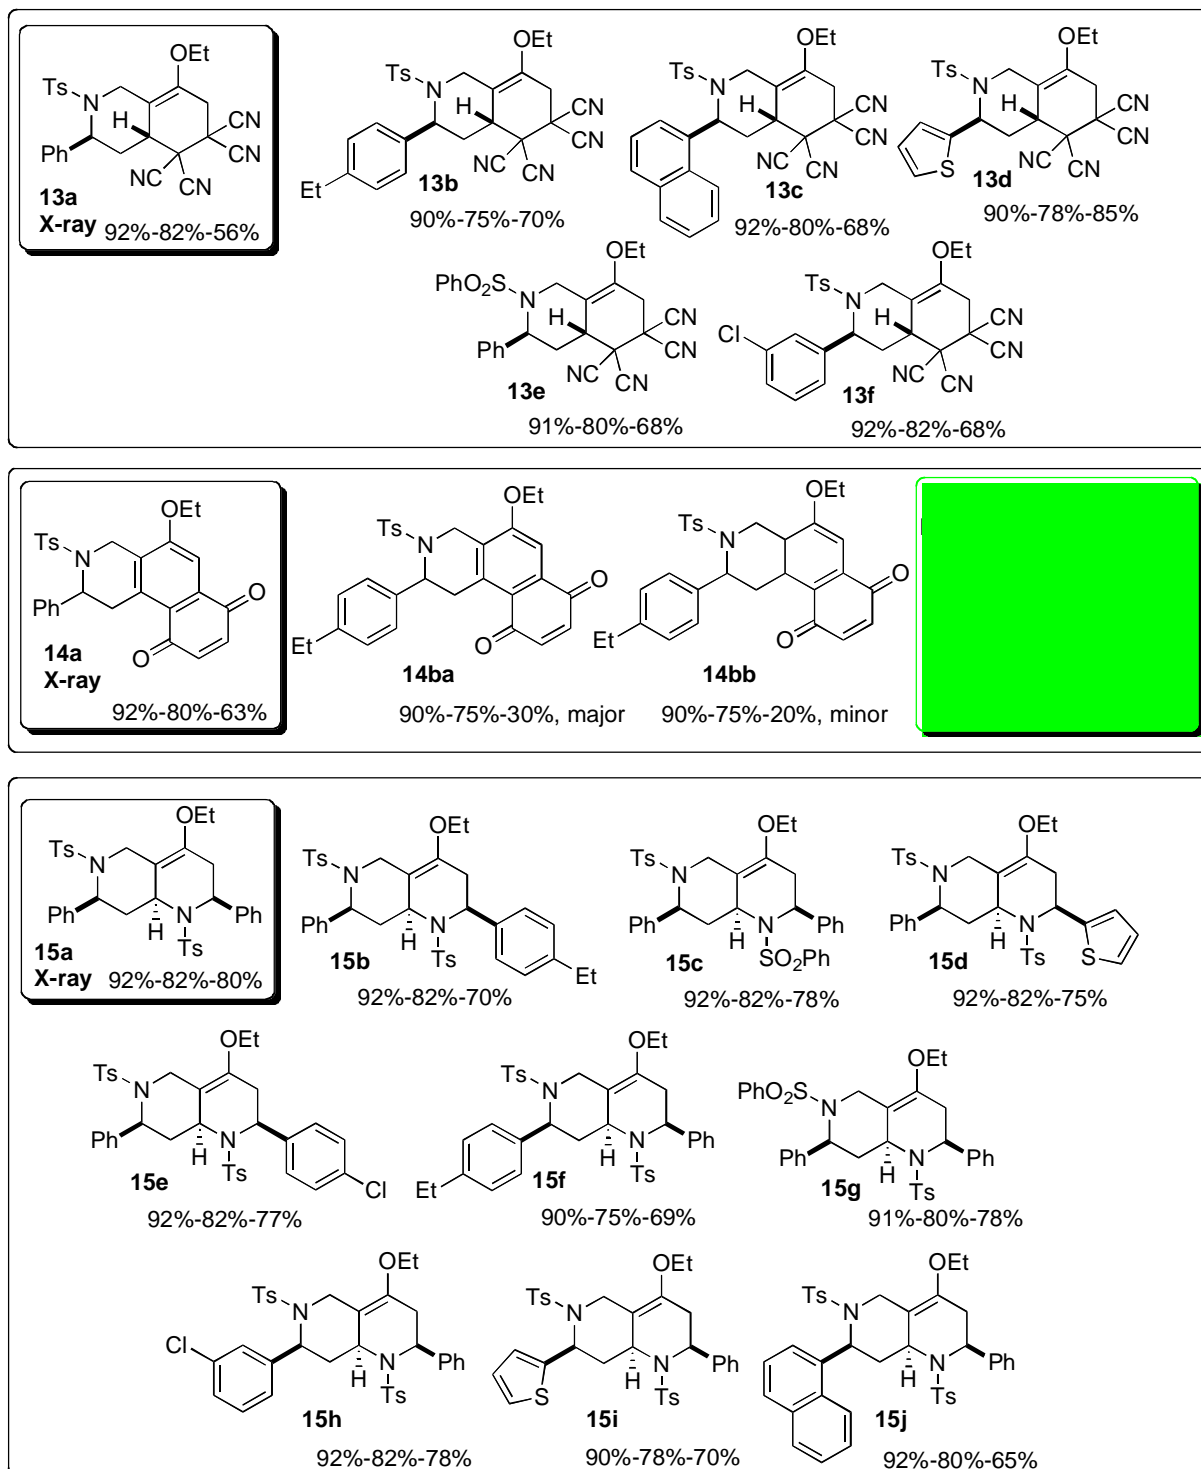

**Figure S3.** Structures of the Ninety-One Library Compounds and the Yields for Their Formation (Continued)

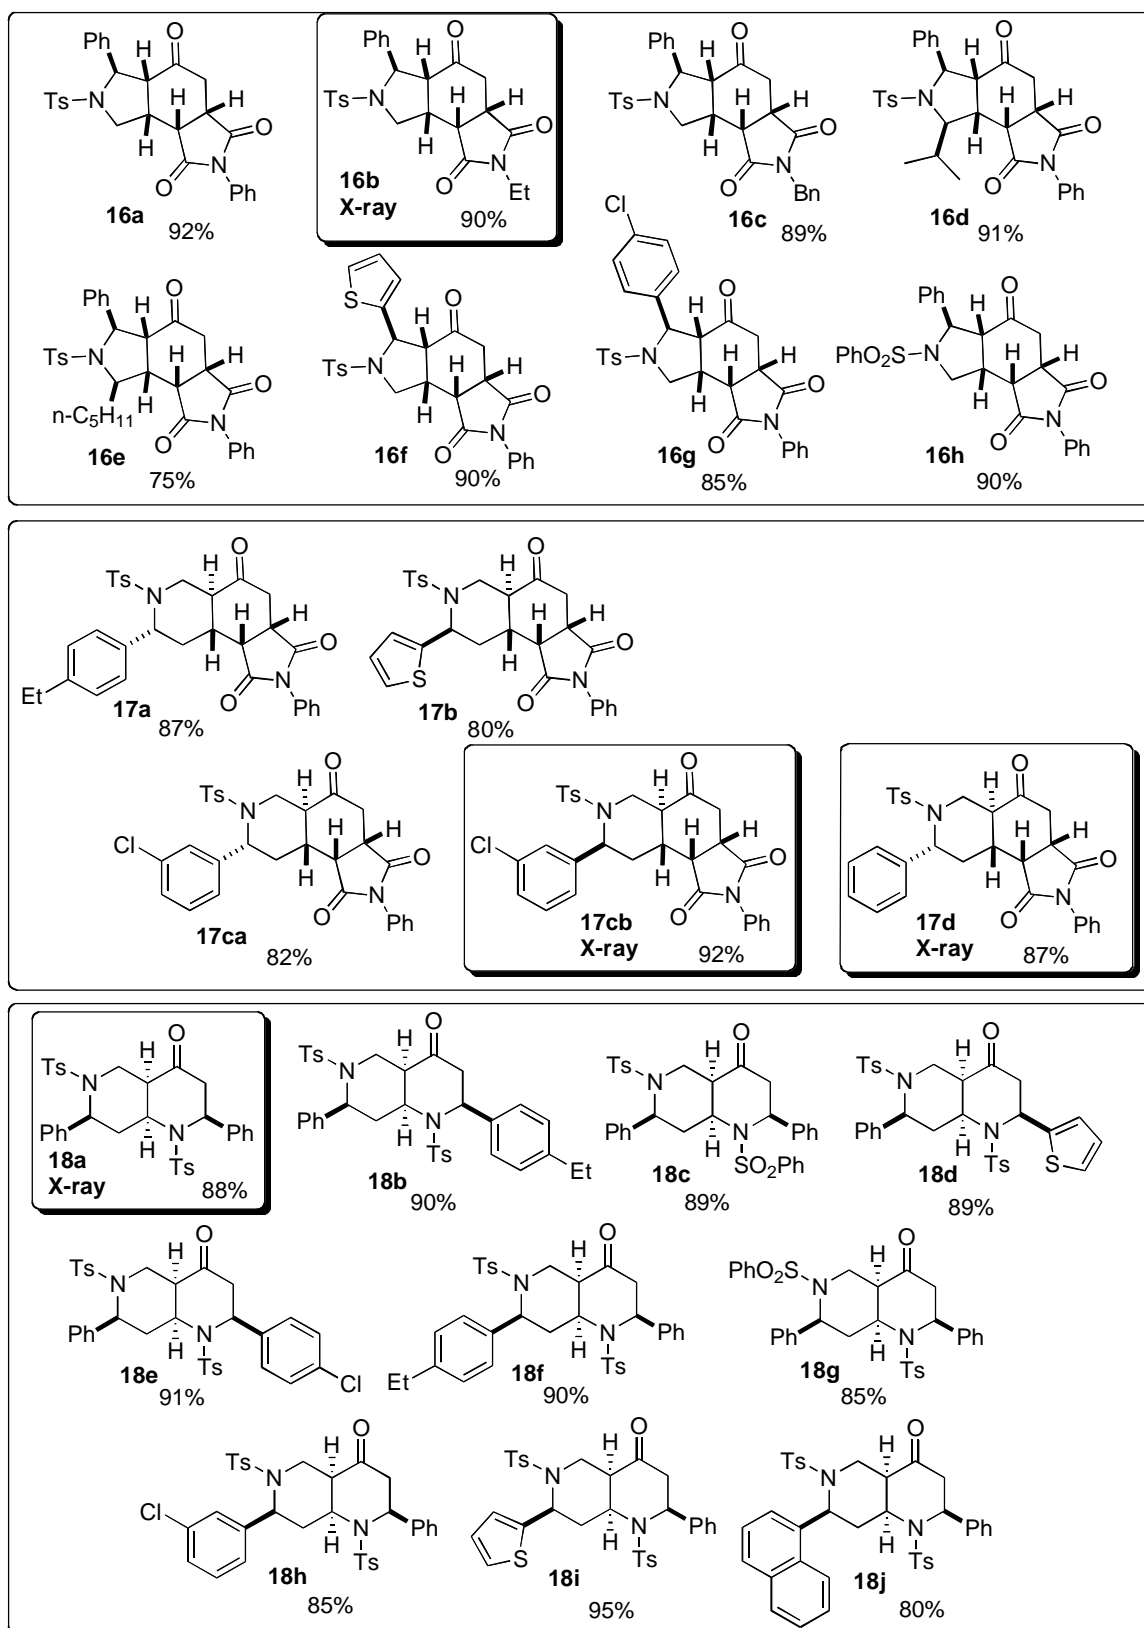

**Figure S3.** Structures of the Ninety-One Library Compounds and the Yields for Their Formation (Continued)

## General Procedure for the Synthesis of 7

A solution of 5–15% MeOH in DCM (1.5 mL) was added to a stirred mixture of the diene (**5**, 0.5 mmol) and maleimide (4.0 eq.) under an Ar atmosphere at room temperature. After the reaction had reached completion (16–48 h, TLC), the mixture was concentrated and the crude residue purified through flash column chromatography (SiO<sub>2</sub>; 30–50% EtOAc in hexanes) to afford the product.

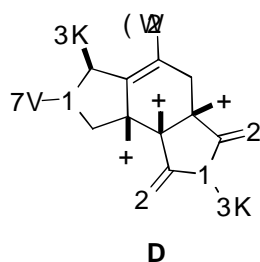

**7a**: 71% yield; white solid; decomposed at 180 °C; IR (film)  $\nu_{\max}$  3062, 2978, 2924, 1713, 1381, 1165, 663  $\text{cm}^{-1}$ ; <sup>1</sup>H NMR (400 MHz, CDCl<sub>3</sub>)  $\delta$  7.55 (d,  $J$  = 8.3 Hz, 2H), 7.46–7.40 (m, 3H), 7.32–7.21 (m, 5H, overlap with solvent residual peak), 7.16 (d,  $J$  = 7.9 Hz, 2H), 7.08–7.05 (m, 2H), 5.21 (t,  $J$  = 2.1 Hz, 1H), 4.04 (dd,  $J$  = 9.9, 8.1 Hz, 1H), 3.70–3.57 (m, 2H), 3.43–3.31 (m, 4H), 2.95 (dd,  $J$  = 16.0, 1.6 Hz, 1H), 2.37 (s, 3H), 2.27–2.20 (m, 1H), 0.96 (t,  $J$  = 7.2 Hz, 3H); <sup>13</sup>C NMR (125 MHz, CDCl<sub>3</sub>)  $\delta$  177.4, 175.3, 145.0, 143.1, 142.0, 133.8, 131.4, 129.2, 128.9, 128.5, 127.9, 127.7, 127.2, 127.1, 126.1, 118.6, 63.9, 63.5, 50.9, 40.8, 40.1, 36.4, 23.5, 21.4, 14.8; MS (MALDI) calcd. for C<sub>31</sub>H<sub>30</sub>N<sub>2</sub>O<sub>5</sub>SNa [M + Na]<sup>+</sup> 565.18, found 565.19; HRMS (ESI) calcd. for C<sub>31</sub>H<sub>31</sub>N<sub>2</sub>O<sub>5</sub>S [M + H]<sup>+</sup> 543.1953, found 543.1945.

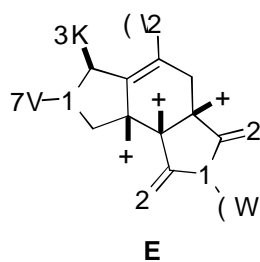

**7b**: 70% yield; yellow solid; decomposed at 170 °C; IR (film)  $\nu_{\max}$  3031, 2978, 2938, 1699, 1348, 1162, 667  $\text{cm}^{-1}$ ; <sup>1</sup>H NMR (400 MHz, CDCl<sub>3</sub>)  $\delta$  7.49 (d,  $J$  = 8.2 Hz, 2H), 7.22–7.15 (m, 7H), 5.07 (t,  $J$  = 2.0 Hz, 1H), 3.91 (dd,  $J$  = 10.0, 8.0 Hz, 1H), 3.70 (dd,  $J$  = 9.8, 7.7 Hz, 1H), 3.56–3.48 (m, 1H), 3.37 (q,  $J$  = 7.2 Hz, 2H), 3.30–3.13 (m, 3H), 3.06 (t,  $J$  = 6.8 Hz, 1H), 2.77

(dd,  $J = 15.7, 1.5$  Hz, 1H), 2.35 (s, 3H), 2.13–2.06 (m, 1H), 0.94 (t,  $J = 7.1$  Hz, 3H), 0.88 (t,  $J = 7.0$  Hz, 3H);  $^{13}\text{C}$  NMR (100 MHz,  $\text{CDCl}_3$ )  $\delta$  178.4, 176.3, 145.1, 143.2, 142.1, 134.0, 129.3, 127.9, 127.8, 127.4, 127.2, 119.0, 64.0, 63.6, 50.6, 40.6, 40.1, 36.7, 33.9, 23.9, 21.5, 14.9, 13.0; MS (MALDI) calcd. for  $\text{C}_{27}\text{H}_{30}\text{N}_2\text{O}_5\text{SNa}$   $[\text{M} + \text{Na}]^+$  517.18, found 517.17; HRMS (ESI) calcd. for  $\text{C}_{27}\text{H}_{31}\text{N}_2\text{O}_5\text{S}$   $[\text{M} + \text{H}]^+$  495.1943, found 495.1961.

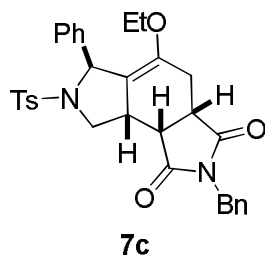

**7c:** 76% yield; yellow solid; decomposed at 170 °C; IR (film)  $\nu_{\text{max}}$  3029, 2976, 2917, 1706, 1349, 1166, 667  $\text{cm}^{-1}$ ;  $^1\text{H}$  NMR (400 MHz,  $\text{CDCl}_3$ )  $\delta$  7.45 (d,  $J = 8.5$  Hz, 2H), 7.32–7.29 (m, 3H), 7.25–7.22 (m, 2H), 7.18–7.12 (m, 7H), 5.09 (t,  $J = 1.9$  Hz, 1H), 4.62 (AB d,  $J = 14.3$  Hz, 1H), 4.45 (AB d,  $J = 14.3$  Hz, 1H), 4.18–4.14 (m, 1H), 3.93–3.88 (m, 1H), 3.26–3.17 (m, 4H), 3.12 (t,  $J = 7.3$  Hz, 1H), 2.79 (dd,  $J = 15.6, 1.7$  Hz, 1H), 2.35 (s, 3H), 2.16–2.09 (m, 1H), 0.83 (t,  $J = 6.9$  Hz, 3H);  $^{13}\text{C}$  NMR (100 MHz,  $\text{CDCl}_3$ )  $\delta$  178.3, 176.0, 145.2, 143.0, 141.6, 135.6, 134.8, 129.2, 128.7, 128.4, 128.0, 127.9, 127.7, 127.5, 127.2, 119.1, 64.2, 63.8, 49.6, 42.5, 40.6, 40.5, 37.6, 24.7, 21.5, 14.9; MS (MALDI) calcd. for  $\text{C}_{32}\text{H}_{32}\text{N}_2\text{O}_5\text{SNa}$   $[\text{M} + \text{Na}]^+$  579.19, found 579.19; HRMS (ESI) calcd. for  $\text{C}_{32}\text{H}_{33}\text{N}_2\text{O}_5\text{S}$   $[\text{M} + \text{H}]^+$  557.2110, found 557.2112.

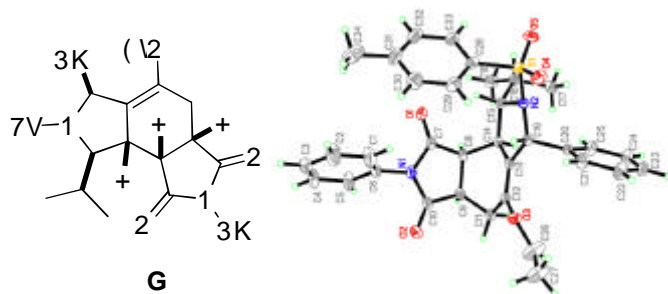

**7d:** 65% yield; white solid; m.p. 209–210 °C; IR (film)  $\nu_{\text{max}}$  3061, 2959, 1709, 1334, 1195  $\text{cm}^{-1}$ ;  $^1\text{H}$  NMR (500 MHz,  $\text{acetone-}d_6$ )  $\delta$  7.68 (d,  $J = 8.3$  Hz, 2H), 7.49–7.46 (m, 2H), 7.42–7.39 (m, 1H), 7.33–7.32 (m, 2H), 7.24–7.14 (m, 7H), 5.44 (t,  $J = 2.3$  Hz, 1H), 4.97 (t,  $J = 6.5$  Hz, 1H), 3.57–3.47 (m, 3H), 3.44–3.38 (m, 1H), 3.19–3.16 (m, 1H), 2.83–2.76 (m, 1H, overlap with  $\text{H}_2\text{O}$  peak), 2.53–2.48 (m, 1H), 2.30 (s, 3H), 2.07–2.03 (m, 1H, overlap with solvent residual peak),

1.02 (d,  $J = 6.9$  Hz, 3H), 0.91 (d,  $J = 6.8$  Hz, 3H), 0.81 (t,  $J = 7.0$  Hz, 3H);  $^{13}\text{C}$  NMR (125 MHz, acetone- $d_6$ )  $\delta$  177.8, 176.0, 145.2, 143.2, 142.3, 135.6, 132.7, 129.2, 128.4, 128.3, 127.9, 127.8, 127.5, 126.8, 126.6, 118.5, 66.2, 63.8, 63.1, 42.0, 41.2, 40.7, 33.2, 24.4, 20.5, 19.4, 16.3, 14.3; MS (MALDI) calcd. for  $\text{C}_{34}\text{H}_{36}\text{N}_2\text{O}_5\text{SNa}$   $[\text{M} + \text{Na}]^+$  607.22, found 607.16; HRMS (ESI) calcd. for  $\text{C}_{34}\text{H}_{37}\text{N}_2\text{O}_5\text{S}$   $[\text{M} + \text{H}]^+$  585.2423, found 585.2393.

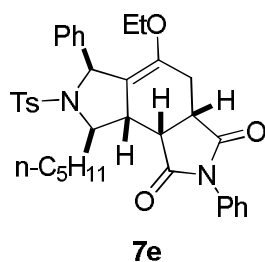

**7e**: 62% yield; white solid; m.p. 139–140 °C; IR (film)  $\nu_{\text{max}}$  2955, 2921, 2857, 1708, 1383, 1153, 663  $\text{cm}^{-1}$ ;  $^1\text{H}$  NMR (500 MHz, acetone- $d_6$ )  $\delta$  7.64 (d,  $J = 8.2$  Hz, 2H), 7.49–7.45 (m, 2H), 7.43–7.38 (m, 3H), 7.26–7.24 (m, 2H), 7.20–7.16 (m, 1H), 7.11 (d,  $J = 8.0$  Hz, 2H), 7.08–7.06 (m, 2H), 5.37 (t,  $J = 2.3$  Hz, 1H), 4.91–4.88 (m, 1H), 3.57–3.46 (m, 3H), 3.40–3.34 (m, 1H), 3.14–3.11 (m, 1H), 2.82–2.76 (m, 1H, overlap with  $\text{H}_2\text{O}$  peak), 2.39–2.34 (m, 1H), 2.27 (s, 3H), 2.19–2.13 (m, 1H), 1.81–1.73 (m, 1H), 1.54–1.48 (m, 2H), 1.40–1.29 (m, 4H), 0.88 (t,  $J = 7.1$  Hz, 3H), 0.83 (t,  $J = 7.0$  Hz, 3H);  $^{13}\text{C}$  NMR (125 MHz, acetone- $d_6$ )  $\delta$  177.8, 175.8, 145.0, 143.6, 143.0, 135.5, 132.5, 129.2, 128.4, 128.0, 127.9, 127.6, 127.5, 126.6, 126.5, 118.9, 64.4, 63.1, 61.6, 45.0, 41.5, 40.6, 38.3, 31.5, 25.1, 24.5, 22.3, 20.6, 14.3, 13.3; MS (MALDI) calcd. for  $\text{C}_{36}\text{H}_{40}\text{N}_2\text{O}_5\text{SNa}$   $[\text{M} + \text{Na}]^+$  635.26, found 635.11; HRMS (ESI) calcd. for  $\text{C}_{36}\text{H}_{41}\text{N}_2\text{O}_5\text{S}$   $[\text{M} + \text{H}]^+$  613.2736, found 613.2703.

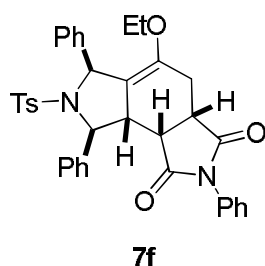

**7f**: 71% yield; white solid; m.p. 182–183 °C; IR (film)  $\nu_{\text{max}}$  3061, 3028, 2981, 1708, 1387, 1163, 663  $\text{cm}^{-1}$ ;  $^1\text{H}$  NMR (500 MHz,  $\text{CDCl}_3$ )  $\delta$  7.59–7.58 (m, 2H), 7.50–7.41 (m, 5H), 7.37–7.25 (m, 8H), 7.14–7.11 (m, 2H), 7.02 (d,  $J = 8.0$  Hz, 2H), 5.74 (d,  $J = 8.1$  Hz, 1H), 5.51 (t,  $J = 2.5$  Hz,

1H), 3.56–3.50 (m, 1H), 3.26–3.13 (m, 4H), 2.83 (dd,  $J = 15.5, 1.2$  Hz, 1H), 2.29 (s, 3H), 2.25–2.20 (m, 1H), 0.82 (t,  $J = 7.0$  Hz, 3H);  $^{13}\text{C}$  NMR (125 MHz,  $\text{CDCl}_3$ ) d 177.5, 175.5, 145.1, 143.0, 142.9, 141.8, 134.8, 131.5, 129.0, 128.9, 128.6, 128.4, 128.2, 128.0, 127.9, 127.4, 127.2, 127.1, 126.2, 118.3, 65.4, 64.7, 63.8, 49.6, 40.6, 39.7, 25.4, 21.4, 16.7; MS (MALDI) calcd. for  $\text{C}_{37}\text{H}_{34}\text{N}_2\text{O}_5\text{SNa}$   $[\text{M} + \text{Na}]^+$  641.21, found 641.23; HRMS (ESI) calcd. for  $\text{C}_{37}\text{H}_{35}\text{N}_2\text{O}_5\text{S}$   $[\text{M} + \text{H}]^+$  619.2266, found 619.2261.

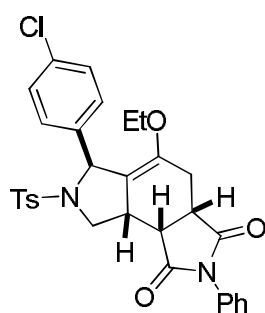

**7g**

**7g**: 56% yield; white solid; m.p. 184–185 °C; IR (film)  $\nu_{\text{max}}$  2979, 2896, 1712, 1385, 1162, 669  $\text{cm}^{-1}$ ;  $^1\text{H}$  NMR (500 MHz,  $\text{CDCl}_3$ ) d 7.56 (d,  $J = 8.2$  Hz, 2H), 7.45–7.38 (m, 3H), 7.26–7.21 (m, 4H), 7.18 (d,  $J = 8.1$  Hz, 2H), 7.03 (d,  $J = 7.1$  Hz, 2H), 5.12 (s, 1H), 4.03 (t,  $J = 9.0$  Hz, 1H), 3.64–3.59 (m, 2H), 3.47–3.36 (m, 2H), 3.33–3.30 (m, 2H), 2.95 (d,  $J = 16.0$  Hz, 1H), 2.38 (s, 3H), 2.22–2.18 (m, 1H), 0.97 (t,  $J = 7.0$  Hz, 3H);  $^{13}\text{C}$  NMR (125 MHz,  $\text{CDCl}_3$ ) d 177.4, 175.3, 145.4, 143.5, 140.7, 133.5, 132.8, 131.4, 129.4, 129.0, 128.65, 128.60, 128.1, 127.8, 126.1, 117.7, 63.5, 63.3, 51.1, 40.8, 40.0, 36.2, 23.3, 21.5, 14.9; MS (MALDI) calcd. for  $\text{C}_{31}\text{H}_{29}\text{ClN}_2\text{O}_5\text{SNa}$   $[\text{M} + \text{Na}]^+$  599.14, found 599.15; HRMS (ESI) calcd. for  $\text{C}_{31}\text{H}_{30}\text{ClN}_2\text{O}_5\text{S}$   $[\text{M} + \text{H}]^+$  577.1564, found 577.1543.

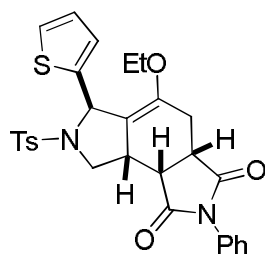

**7h**

**7h**: 75% yield; white solid; m.p. 179–180 °C; IR (film)  $\nu_{\max}$  3066, 2979, 2896, 1706, 1385, 1163, 664  $\text{cm}^{-1}$ ;  $^1\text{H}$  NMR (500 MHz, acetone- $d_6$ )  $\delta$  7.53 (d,  $J = 8.2$  Hz, 2H), 7.48–7.45 (m, 2H), 7.42–7.38 (m, 1H), 7.23–7.21 (m, 3H), 7.11–7.08 (m, 2H), 7.03 (dq,  $J = 3.6, 0.5$  Hz, 1H), 6.87 (dd,  $J = 5.1, 3.5$  Hz, 1H), 5.65 (t,  $J = 1.8$  Hz, 1H), 3.79 (dd,  $J = 7.7, 0.8$  Hz, 2H), 3.73–3.58 (m, 2H), 3.54–3.52 (m, 2H), 3.43–3.39 (m, 1H), 2.90–2.78 (m, 1H, overlap with  $\text{H}_2\text{O}$  peak), 2.36–2.30 (m, 1H), 2.33 (s, 3H), 0.98 (t,  $J = 7.0$  Hz, 3H);  $^{13}\text{C}$  NMR (125 MHz, acetone- $d_6$ )  $\delta$  177.7, 175.5, 145.8, 145.7, 143.1, 134.7, 132.5, 129.2, 128.6, 128.0, 127.5, 126.5, 125.8, 125.4, 124.4, 117.5, 63.2, 59.0, 49.8, 40.7, 40.1, 36.1, 23.3, 20.5, 14.4; MS (MALDI) calcd. for  $\text{C}_{29}\text{H}_{28}\text{N}_2\text{O}_5\text{S}_2\text{Na}$   $[\text{M} + \text{Na}]^+$  571.13, found 570.90; HRMS (ESI) calcd. for  $\text{C}_{29}\text{H}_{29}\text{N}_2\text{O}_5\text{S}_2$   $[\text{M} + \text{H}]^+$  549.1518, found 549.1511.

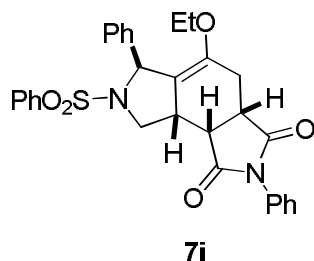

**7i**: 70% yield; white solid; m.p. 171–172 °C; IR (film)  $\nu_{\max}$  3059, 2983, 2913, 1704, 1389, 1164, 693  $\text{cm}^{-1}$ ;  $^1\text{H}$  NMR (500 MHz, acetone- $d_6$ )  $\delta$  7.69–7.67 (m, 2H), 7.62–7.59 (m, 1H), 7.48–7.44 (m, 4H), 7.41–7.37 (m, 1H), 7.34–7.32 (m, 2H), 7.24–7.16 (m, 3H), 7.00–6.98 (m, 2H), 5.21 (t,  $J = 2.3$  Hz, 1H), 4.00–3.96 (m, 1H), 3.72–3.69 (m, 1H), 3.61–3.50 (m, 4H), 3.39–3.33 (m, 1H), 2.83–2.79 (m, 1H, overlap with  $\text{H}_2\text{O}$  peak), 2.32–2.27 (m, 1H), 0.86 (t,  $J = 7.0$  Hz, 3H);  $^{13}\text{C}$  NMR (125 MHz, acetone- $d_6$ )  $\delta$  177.6, 175.7, 145.4, 142.8, 137.0, 132.5, 132.4, 128.8, 128.6, 128.0, 127.58, 127.55, 127.5, 126.7, 126.5, 118.8, 64.0, 63.0, 51.1, 40.8, 40.2, 36.2, 23.3, 14.3; MS (MALDI) calcd. for  $\text{C}_{30}\text{H}_{28}\text{N}_2\text{O}_5\text{SNa}$   $[\text{M} + \text{Na}]^+$  551.16, found 551.37; HRMS (ESI) calcd. for  $\text{C}_{30}\text{H}_{29}\text{N}_2\text{O}_5\text{S}$   $[\text{M} + \text{H}]^+$  529.1797, found 529.1796.

### General Procedure for the Synthesis of **8**

*N*-Phenyltriazolinedione (2.0 eq.) was added to a solution of the diene (**5**, 0.5 mmol) in DCM (2.0 mL) at 0 °C. After the reaction had reached completion (10–60 min, TLC), the mixture was

concentrated and the crude residue purified through flash column chromatography (SiO<sub>2</sub>; 40–60% EtOAc in hexanes) to afford the product.

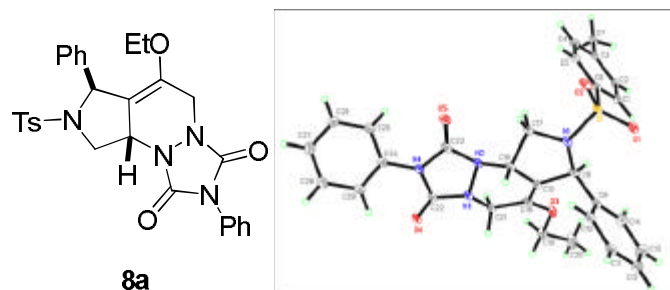

**8a**: 56% yield; white solid; m.p. 178–179 °C; IR (film)  $\nu_{\max}$  3062, 2980, 2916, 1719, 1420, 1163, 665 cm<sup>-1</sup>; <sup>1</sup>H NMR (500 MHz, CDCl<sub>3</sub>)  $\delta$  7.68 (d,  $J$  = 8.2 Hz, 2H), 7.48–7.44 (m, 4H), 7.41–7.37 (m, 3H), 7.34–7.25 (m, 5H), 5.57 (s, 1H), 4.59 (t,  $J$  = 8.0 Hz, 1H), 4.40 (d,  $J$  = 15.3 Hz, 1H), 4.37 (dd,  $J$  = 9.2, 8.0 Hz, 1H), 3.85 (d,  $J$  = 15.3 Hz, 1H), 3.78 (qd,  $J$  = 7.0, 2.3 Hz, 1H), 3.72 (qd,  $J$  = 7.0, 2.3 Hz, 1H), 3.35 (t,  $J$  = 9.2 Hz, 1H), 2.43 (s, 3H), 1.23 (t,  $J$  = 7.0 Hz, 3H); <sup>13</sup>C NMR (125 MHz, CDCl<sub>3</sub>)  $\delta$  153.6, 151.1, 143.8, 141.1, 140.4, 133.8, 130.6, 129.5, 129.2, 128.38, 128.37, 127.8, 127.6, 126.4, 125.2, 115.2, 64.8, 61.3, 54.4, 52.2, 41.9, 21.5, 15.1; MS (MALDI) calcd. for C<sub>29</sub>H<sub>28</sub>N<sub>4</sub>O<sub>5</sub>SNa [M + Na]<sup>+</sup> 567.17, found 567.15; HRMS (ESI) calcd. for C<sub>29</sub>H<sub>29</sub>N<sub>4</sub>O<sub>5</sub>S [M + H]<sup>+</sup> 545.1858, found 545.1840.

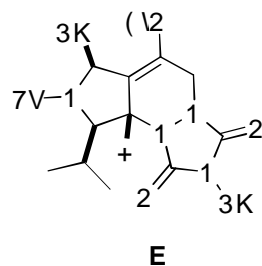

**8b**: 63% yield; white solid; m.p. 100–101 °C; IR (film)  $\nu_{\max}$  3061, 2966, 2914, 1719, 1418, 1163, 664 cm<sup>-1</sup>; <sup>1</sup>H NMR (500 MHz, CDCl<sub>3</sub>)  $\delta$  7.78 (d,  $J$  = 8.1 Hz, 2H), 7.50–7.47 (m, 6H), 7.41–7.38 (m, 1H), 7.35 (t,  $J$  = 7.4 Hz, 2H), 7.29 (t,  $J$  = 7.3 Hz, 1H), 7.23 (d,  $J$  = 8.0 Hz, 2H), 6.02 (s, 1H), 4.60 (dd,  $J$  = 9.1, 2.8 Hz, 1H), 4.33 (d,  $J$  = 14.6 Hz, 1H), 4.24 (s, 1H), 3.82 (qd,  $J$  = 7.0, 2.2 Hz, 1H), 3.76 (qd,  $J$  = 7.0, 2.2 Hz, 1H), 3.21 (dd,  $J$  = 15.4, 1.8 Hz, 1H), 2.36 (s, 3H), 1.30–1.25 (m, 1H), 1.24 (t,  $J$  = 7.0 Hz, 3H), 0.94 (d,  $J$  = 6.8 Hz, 3H), 0.80 (d,  $J$  = 6.8 Hz, 3H); <sup>13</sup>C NMR (125 MHz, CDCl<sub>3</sub>)  $\delta$  151.7, 151.5, 143.4, 143.3, 138.4, 135.4, 130.7, 129.2, 128.7,



128.5, 128.3, 128.2, 127.8, 126.9, 125.0, 113.0, 68.3, 65.3, 62.7, 62.2, 43.0, 33.0, 21.4, 20.5, 19.5, 15.4; MS (MALDI) calcd. for  $C_{32}H_{34}N_4O_5SNa$   $[M + Na]^+$  609.21, found 609.20; HRMS (ESI) calcd. for  $C_{32}H_{35}N_4O_5S$   $[M + H]^+$  587.2328, found 587.2346.

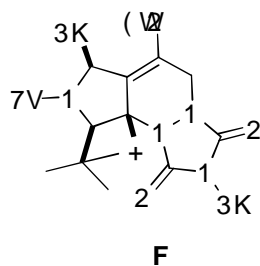

**8c**: 75% yield; white solid; m.p. 219–220 °C; IR (film)  $\nu_{max}$  3059, 2960, 2906, 1719, 1417, 1163, 598  $cm^{-1}$ ;  $^1H$  NMR (500 MHz,  $CDCl_3$ ) d 7.83 (d,  $J = 8.2$  Hz, 2H), 7.54–7.47 (m, 6H), 7.43–7.40 (m, 1H), 7.35 (t,  $J = 7.7$  Hz, 2H), 7.27 (t,  $J = 7.4$  Hz, 1H), 7.21 (d,  $J = 8.0$  Hz, 2H), 6.08 (s, 1H), 5.04 (d,  $J = 2.8$  Hz, 1H), 4.41–4.36 (m, 2H), 3.84–3.78 (m, 2H), 3.33 (d,  $J = 14.6$  Hz, 1H), 2.36 (s, 3H), 1.24 (t,  $J = 7.0$  Hz, 3H), 0.71 (s, 9H);  $^{13}C$  NMR (125 MHz,  $CDCl_3$ ) d 152.2, 150.2, 143.8, 143.4, 138.9, 134.9, 130.7, 129.2, 128.8, 128.6, 128.3, 128.2, 127.4, 127.1, 125.0, 114.0, 69.7, 64.6, 63.8, 60.8, 43.7, 35.1, 28.1, 21.4, 15.5; MS (MALDI) calcd. for  $C_{33}H_{36}N_4O_5SNa$   $[M + Na]^+$  623.23, found 623.24; HRMS (ESI) calcd. for  $C_{33}H_{37}N_4O_5S$   $[M + H]^+$  601.2484, found 601.2480.

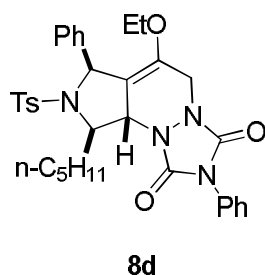

**8d**: 82% yield; semi-solid; IR (film)  $\nu_{max}$  3060, 2920, 2852, 1718, 1420, 1164, 665  $cm^{-1}$ ;  $^1H$  NMR (500 MHz,  $CDCl_3$ ) d 7.75 (d,  $J = 8.2$  Hz, 2H), 7.49–7.44 (m, 6H), 7.40–7.32 (m, 3H), 7.29–7.24 (m, 3H), 5.90 (s, 1H), 4.51 (dt,  $J = 10.3, 3.7$  Hz, 1H), 4.35 (dd,  $J = 15.4, 1.6$  Hz, 1H), 4.03 (d,  $J = 2.3$  Hz, 1H), 3.79 (qd,  $J = 7.0, 2.1$  Hz, 1H), 3.64 (qd,  $J = 7.0, 2.1$  Hz, 1H), 3.25 (dd,  $J = 15.4, 2.1$  Hz, 1H), 2.39 (s, 3H), 1.83–1.77 (m, 1H), 1.52–1.41 (m, 2H), 1.26–1.03 (m, 5H), 1.22 (t,  $J = 7.0$  Hz, 3H), 0.80 (t,  $J = 7.2$  Hz, 3H);  $^{13}C$  NMR (125 MHz,  $CDCl_3$ ) d 153.4, 151.0,

143.4, 142.4, 138.5, 135.3, 130.6, 129.2, 129.0, 128.4, 128.3, 128.2, 127.8, 126.6, 125.1, 111.8, 65.0, 64.7, 63.4, 61.8, 41.9, 35.9, 31.3, 25.6, 22.2, 21.4, 15.3, 14.0; MS (MALDI) calcd. for  $C_{34}H_{38}N_4O_5SNa [M + Na]^+$  637.24, found 637.26.

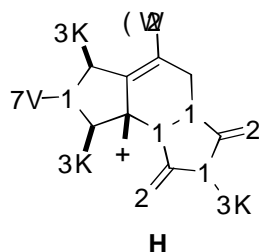

**8e**: 81% yield; yellow solid; m.p. 106–107 °C; IR (film)  $\nu_{\max}$  3062, 2981, 2914, 1722, 1418, 1163, 663  $cm^{-1}$ ;  $^1H$  NMR (500 MHz,  $CDCl_3$ ) d 7.57 (d,  $J = 7.6$  Hz, 2H), 7.52 (d,  $J = 8.2$  Hz, 2H), 7.42–7.31 (m, 8H), 7.18–7.14 (m, 7H), 6.15 (s, 1H), 5.13 (d,  $J = 6.5$  Hz, 1H), 4.80–4.79 (m, 1H), 4.43 (dd,  $J = 15.4, 1.3$  Hz, 1H), 3.86 (qd,  $J = 7.0, 2.2$  Hz, 1H), 3.79–3.73 (m, 2H), 2.39 (s, 3H), 1.29 (t,  $J = 7.0$  Hz, 3H);  $^{13}C$  NMR (125 MHz,  $CDCl_3$ ) d 152.4, 151.8, 143.4, 142.4, 139.3, 138.9, 135.4, 130.6, 129.1, 129.0, 128.9, 128.5, 128.3, 127.9, 127.8, 127.7, 127.6, 127.3, 125.4, 112.7, 68.3, 65.0, 64.2, 61.5, 42.3, 21.5, 15.3; MS (MALDI) calcd. for  $C_{35}H_{32}N_4O_5SNa [M + Na]^+$  643.20, found 643.16; HRMS (ESI) calcd. for  $C_{35}H_{33}N_4O_5S [M + H]^+$  621.2171, found 621.2122.

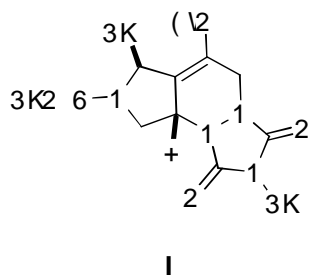

**8f**: 83% yield; white solid; m.p. 89–90 °C; IR (film)  $\nu_{\max}$  3063, 2980, 2916, 1718, 1420, 1167, 690  $cm^{-1}$ ;  $^1H$  NMR (500 MHz,  $CDCl_3$ ) d 7.79 (d,  $J = 7.5$  Hz, 2H), 7.60–7.26 (m, 13H), 5.61 (s, 1H), 4.58 (t,  $J = 7.3$  Hz, 1H), 4.41–4.36 (m, 2H), 3.85–3.69 (m, 3H), 3.40 (t,  $J = 9.2$  Hz, 1H), 1.23 (t,  $J = 7.0$  Hz, 3H);  $^{13}C$  NMR (125 MHz,  $CDCl_3$ ) d 153.6, 151.1, 141.2, 140.2, 136.9, 132.9, 130.6, 129.2, 128.9, 128.4, 128.3, 127.7, 127.6, 126.4, 125.2, 114.2, 64.8, 61.4, 54.4, 52.2, 41.9, 15.1; MS (MALDI) calcd. for  $C_{28}H_{26}N_4O_5SNa [M + Na]^+$  553.15, found 553.16; HRMS (ESI) calcd. for  $C_{28}H_{27}N_4O_5S [M + H]^+$  531.1702, found 531.1713.

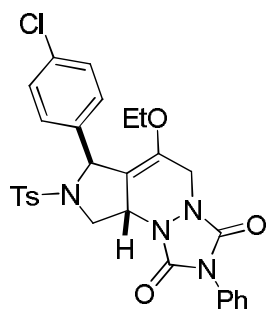

**8g**

**8g**: 35% yield; white solid; m.p. 212–213 °C; IR (film)  $\nu_{\max}$  3064, 2982, 2897, 1719, 1420, 1164, 661  $\text{cm}^{-1}$ ;  $^1\text{H}$  NMR (500 MHz,  $\text{CDCl}_3$ ) d 7.68 (d,  $J = 8.2$  Hz, 2H), 7.50–7.28 (m, 11H), 5.49 (s, 1H), 4.57–4.54 (m, 1H), 4.41 (dt,  $J = 15.5, 2.0$  Hz, 1H), 4.37 (dd,  $J = 9.3, 7.2$  Hz, 1H), 3.87 (d,  $J = 15.4$  Hz, 1H), 3.79 (qd,  $J = 7.0, 2.2$  Hz, 1H), 3.74 (qd,  $J = 7.0, 2.2$  Hz, 1H), 3.29 (t,  $J = 9.2$  Hz, 1H), 2.44 (s, 3H), 1.23 (t,  $J = 7.0$  Hz, 3H);  $^{13}\text{C}$  NMR (125 MHz,  $\text{CDCl}_3$ ) d 153.6, 151.2, 144.0, 141.5, 139.1, 133.5, 133.4, 130.6, 129.6, 129.2, 128.5, 128.4, 127.9, 127.8, 125.2, 114.6, 64.7, 60.8, 54.2, 52.3, 41.9, 21.5, 15.1; MS (MALDI) calcd. for  $\text{C}_{29}\text{H}_{27}\text{ClN}_4\text{O}_5\text{SNa}$   $[\text{M} + \text{Na}]^+$  601.13, found 601.16.

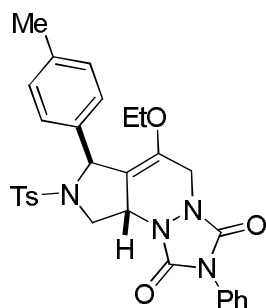

**8h**

**8h**: 53% yield; white solid; m.p. 195–196 °C; IR (film)  $\nu_{\max}$  3055, 2981, 2918, 1718, 1420, 1164, 665  $\text{cm}^{-1}$ ;  $^1\text{H}$  NMR (500 MHz,  $\text{CDCl}_3$ ) d 7.69 (d,  $J = 8.2$  Hz, 2H), 7.48–7.44 (m, 4H), 7.40–7.36 (m, 1H), 7.30–7.28 (m, 4H), 7.13 (d,  $J = 7.9$  Hz, 2H), 5.53 (s, 1H), 4.60–4.57 (m, 1H), 4.38 (dt,  $J = 15.9, 2.0$  Hz, 1H), 4.36 (dd,  $J = 9.4, 7.2$  Hz, 1H), 3.84 (dq,  $J = 15.4, 1.1$  Hz, 1H), 3.77 (qd,  $J = 6.7, 2.1$  Hz, 1H), 3.71 (qd,  $J = 6.7, 2.1$  Hz, 1H), 3.32 (t,  $J = 9.2$  Hz, 1H), 2.43 (s, 3H), 2.34 (s, 3H), 1.23 (t,  $J = 6.7$  Hz, 3H);  $^{13}\text{C}$  NMR (125 MHz,  $\text{CDCl}_3$ ) d 153.6, 151.1, 143.7, 141.0, 137.5, 137.3, 133.8, 130.6, 129.5, 129.2, 129.1, 128.4, 127.8, 126.3, 125.2, 115.4, 64.8,

61.2, 54.4, 52.2, 42.0, 21.5, 21.0, 15.1; MS (MALDI) calcd. for  $C_{30}H_{30}N_4O_5SNa$   $[M + Na]^+$  581.18, found 581.16; HRMS (ESI) calcd. for  $C_{30}H_{31}N_4O_5S$   $[M + H]^+$  559.2015, found 559.2031.

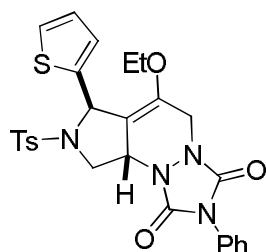

**8i**

**8i**: 75% yield; yellow solid; m.p. 104–105 °C; IR (film)  $\nu_{\max}$  3065, 2981, 1718, 1421, 1164, 663  $cm^{-1}$ ;  $^1H$  NMR (500 MHz,  $CDCl_3$ ) d 7.68 (d,  $J = 8.0$  Hz, 2H), 7.45–7.44 (m, 4H), 7.38–7.35 (m, 1H), 7.27 (d,  $J = 8.1$  Hz, 2H), 7.20 (d,  $J = 4.8$  Hz, 1H), 7.07 (d,  $J = 2.9$  Hz, 1H), 6.93 (t,  $J = 4.2$  Hz, 1H), 5.89 (s, 1H), 4.63 (t,  $J = 7.3$  Hz, 1H), 4.42 (d,  $J = 15.4$  Hz, 1H), 4.26 (dd,  $J = 9.1, 7.5$  Hz, 1H), 3.84 (d,  $J = 15.6$  Hz, 1H), 3.81–3.73 (m, 2H), 3.33 (t,  $J = 9.1$  Hz, 1H), 2.40 (s, 3H), 1.23 (t,  $J = 6.9$  Hz, 3H);  $^{13}C$  NMR (125 MHz,  $CDCl_3$ ) d 153.6, 151.2, 144.6, 143.9, 141.6, 134.0, 130.7, 129.6, 129.2, 128.3, 127.8, 126.7, 125.2, 125.1, 125.0, 114.2, 65.0, 57.0, 54.4, 52.0, 42.0, 21.5, 15.1; MS (MALDI) calcd. for  $C_{27}H_{26}N_4O_5S_2Na$   $[M + Na]^+$  573.12, found 573.16; HRMS (ESI) calcd. for  $C_{27}H_{27}N_4O_5S_2$   $[M + H]^+$  551.1423, found 551.1404.

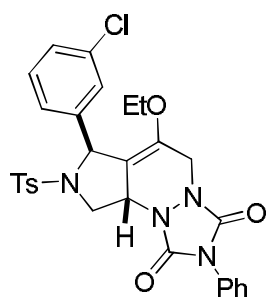

**8j**

**8j**: 40% yield; yellow solid; m.p. 143–144 °C; IR (film)  $\nu_{\max}$  3063, 2981, 1718, 1420, 1164, 661  $cm^{-1}$ ;  $^1H$  NMR (500 MHz,  $CDCl_3$ ) d 7.68 (d,  $J = 8.1$  Hz, 2H), 7.47–7.21 (m, 11H), 5.48 (s, 1H), 4.55 (t,  $J = 7.4$  Hz, 1H), 4.41–4.36 (m, 2H), 3.85 (d,  $J = 15.4$  Hz, 1H), 3.82–3.69 (m, 2H), 3.30 (t,  $J = 9.1$  Hz, 1H), 2.42 (s, 3H), 1.24 (t,  $J = 7.0$  Hz, 3H);  $^{13}C$  NMR (125 MHz,  $CDCl_3$ ) d 153.6,

151.1, 144.1, 142.6, 141.6, 134.2, 133.5, 130.6, 129.7, 129.6, 129.2, 128.4, 127.8, 127.7, 126.6, 125.2, 124.6, 114.3, 64.6, 60.8, 54.2, 52.4, 41.9, 21.5, 15.1; MS (MALDI) calcd. for  $C_{29}H_{27}ClN_4O_5SNa$   $[M + Na]^+$  601.13, found 601.11.

### General Procedure for the Synthesis of **9**

The diene (**5**, 0.5 mmol) in DCM (0.5 mL) was added dropwise to a solution of tetracyanoethylene (2.0 eq.) in DCM (2.0 mL) at 0 °C under an Ar atmosphere. After the reaction had reached completion (30–60 min, TLC), the resulting mixture was concentrated and the crude residue purified through flash column chromatography ( $SiO_2$ ; 25–40% EtOAc in hexanes) to afford the product.

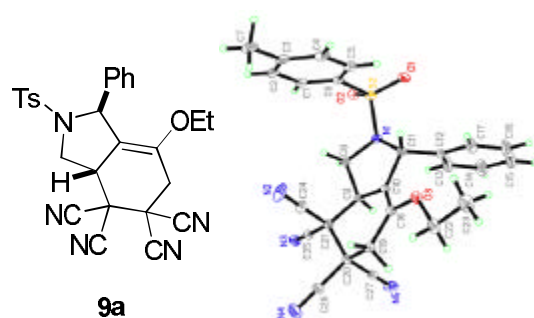

**9a**: 57% yield; yellow solid; m.p. 156–157 °C; IR (film)  $\nu_{max}$  3032, 2984, 2254, 1710, 1354, 1164  $cm^{-1}$ ;  $^1H$  NMR (500 MHz,  $CDCl_3$ ) d 7.57 (d,  $J = 8.2$  Hz, 2H), 7.32–7.22 (m, 7H), 5.41 (d,  $J = 1.3$  Hz, 1H), 4.21 (dd,  $J = 9.6, 7.7$  Hz, 1H), 3.87–3.84 (m, 1H), 3.70–3.59 (m, 2H), 3.48 (t,  $J = 9.6$  Hz, 1H), 3.17 (d,  $J = 17.7$  Hz, 1H), 3.08 (ddd,  $J = 17.7, 3.1, 1.8$  Hz, 1H), 2.40 (s, 3H), 1.11 (t,  $J = 7.0$  Hz, 3H);  $^{13}C$  NMR (125 MHz,  $CDCl_3$ ) d 144.4, 140.0, 139.0, 133.6, 129.7, 128.5, 128.1, 127.6, 126.9, 115.5, 110.0, 109.6, 109.4, 107.6, 65.0, 63.2, 50.3, 42.0, 40.6, 39.4, 32.0, 21.5, 14.7; MS (MALDI) calcd. for  $C_{27}H_{23}N_5O_3SNa$   $[M + Na]^+$  520.14, found 520.13.

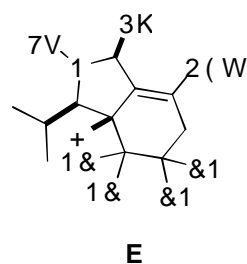

**9b**: 61% yield; white solid; m.p. 171–172 °C; IR (film)  $\nu_{\max}$  3058, 2968, 2928, 2252, 1713, 1351, 1162  $\text{cm}^{-1}$ ;  $^1\text{H}$  NMR (500 MHz,  $\text{CDCl}_3$ ) d 7.82 (d,  $J = 8.2$  Hz, 2H), 7.33–7.28 (m, 7H), 5.82 (s, 1H), 4.03 (dd,  $J = 7.0, 4.0$  Hz, 1H), 3.85 (qd,  $J = 7.0, 2.0$  Hz, 1H), 3.50 (qd,  $J = 7.0, 2.0$  Hz, 1H), 3.37–3.35 (m, 1H), 3.29 (d,  $J = 17.5$  Hz, 1H), 3.12 (dd,  $J = 17.5, 3.2$  Hz, 1H), 2.42 (s, 3H), 2.02–1.95 (m, 1H), 1.22 (t,  $J = 7.0$  Hz, 3H), 1.00 (d,  $J = 6.9$  Hz, 3H), 0.84 (d,  $J = 6.9$  Hz, 3H);  $^{13}\text{C}$  NMR (125 MHz,  $\text{CDCl}_3$ ) d 144.5, 140.0, 137.1, 134.4, 129.9, 128.7, 128.4, 128.1, 126.5, 113.1, 110.6, 110.1, 109.9, 108.0, 69.5, 65.0, 61.8, 46.0, 41.5, 40.8, 33.6, 31.7, 21.4, 19.6, 19.0, 15.2; MS (MALDI) calcd. for  $\text{C}_{30}\text{H}_{29}\text{N}_5\text{O}_3\text{SNa}$   $[\text{M} + \text{Na}]^+$  562.19, found 562.17; HRMS (ESI) calcd. for  $\text{C}_{30}\text{H}_{30}\text{N}_5\text{O}_3\text{S}$   $[\text{M} + \text{H}]^+$  540.2069, found 540.2076.

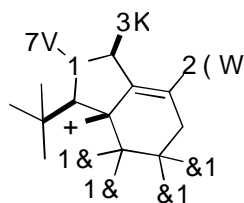

**F**

**9c**: 75% yield; white solid; decomposed at 230 °C; IR (film)  $\nu_{\max}$  3062, 2980, 2251, 1702, 1346, 1160  $\text{cm}^{-1}$ ;  $^1\text{H}$  NMR (500 MHz,  $\text{CDCl}_3$ ) d 7.91 (d,  $J = 8.3$  Hz, 2H), 7.36 (d,  $J = 8.0$  Hz, 2H), 7.25–7.23 (m, 3H), 6.99–6.97 (m, 2H), 5.79 (s, 1H), 4.49 (d,  $J = 5.5$  Hz, 1H), 3.86 (qd,  $J = 7.0, 2.2$  Hz, 1H), 3.62–3.60 (m, 1H), 3.56 (qd,  $J = 7.0, 2.2$  Hz, 1H), 3.35 (d,  $J = 17.5$  Hz, 1H), 3.24 (dd,  $J = 17.5, 3.1$  Hz, 1H), 2.46 (s, 3H), 1.19 (t,  $J = 7.0$  Hz, 3H), 0.82 (s, 9H);  $^{13}\text{C}$  NMR (125 MHz,  $\text{CDCl}_3$ ) d 144.5, 140.7, 137.2, 135.2, 129.8, 129.1, 128.7, 127.9, 126.6, 113.8, 111.4, 110.3, 110.2, 108.5, 71.8, 64.9, 62.0, 44.6, 42.4, 41.8, 35.4, 31.6, 28.2, 21.5, 15.2; MS (MALDI) calcd. for  $\text{C}_{31}\text{H}_{31}\text{N}_5\text{O}_3\text{SNa}$   $[\text{M} + \text{Na}]^+$  576.20, found 576.21; HRMS (ESI) calcd. for  $\text{C}_{31}\text{H}_{32}\text{N}_5\text{O}_3\text{S}$   $[\text{M} + \text{H}]^+$  554.2226, found 554.2220.

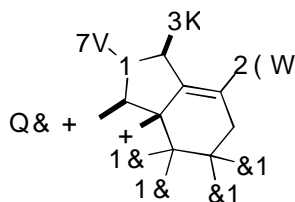

**G**

**9d**: 57% yield; white solid; m.p. 110–111 °C; IR (film)  $\nu_{\max}$  3065, 2930, 2861, 2256, 1714, 1351, 1164  $\text{cm}^{-1}$ ;  $^1\text{H}$  NMR (500 MHz,  $\text{CDCl}_3$ ) d 7.72 (d,  $J = 8.2$  Hz, 2H), 7.41–7.28 (m, 7H), 5.74 (s, 1H), 4.07–4.04 (m, 1H), 3.86 (qd,  $J = 7.0, 2.0$  Hz, 1H), 3.52 (qd,  $J = 7.0, 2.0$  Hz, 1H), 3.38–3.37 (m, 1H), 3.22 (d,  $J = 17.5$  Hz, 1H), 3.10 (dd,  $J = 17.5, 2.9$  Hz, 1H), 2.40 (s, 3H), 2.11–2.04 (m, 1H), 1.77–1.72 (m, 1H), 1.33–1.18 (m, 6H), 1.20 (t,  $J = 7.0$  Hz, 3H), 0.82 (t,  $J = 6.7$  Hz, 3H);  $^{13}\text{C}$  NMR (125 MHz,  $\text{CDCl}_3$ ) d 144.4, 139.5, 138.0, 134.2, 129.8, 128.7, 128.1, 128.0, 126.6, 113.6, 110.0, 109.8, 109.6, 107.8, 65.1, 63.8, 62.0, 46.1, 40.8, 40.2, 34.2, 32.0, 31.3, 23.5, 22.2, 21.4, 15.0, 13.8; MS (MALDI) calcd. for  $\text{C}_{32}\text{H}_{33}\text{N}_5\text{O}_3\text{SNa}$   $[\text{M} + \text{Na}]^+$  590.22, found 590.21.

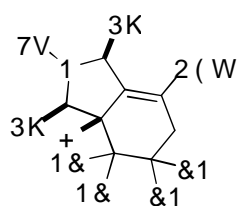

**H**

**9e**: 46% yield; white solid; m.p. 234–235 °C; IR (film)  $\nu_{\max}$  3033, 2984, 2895, 2251, 1712, 1356, 1164  $\text{cm}^{-1}$ ;  $^1\text{H}$  NMR (500 MHz,  $\text{CDCl}_3$ ) d 7.52 (d,  $J = 7.4$  Hz, 2H), 7.43 (t,  $J = 7.4$  Hz, 2H), 7.39–7.34 (m, 2H), 7.29–7.28 (m, 4H), 7.05 (d,  $J = 8.4$  Hz, 2H), 7.00 (d,  $J = 8.4$  Hz, 2H), 5.94 (d,  $J = 1.1$  Hz, 1H), 4.78 (d,  $J = 9.8$  Hz, 1H), 3.80–3.74 (m, 2H), 3.69 (ddd,  $J = 9.8, 4.1, 2.4$  Hz, 1H), 3.20 (s, 2H), 2.32 (s, 3H), 1.23 (t,  $J = 7.0$  Hz, 3H);  $^{13}\text{C}$  NMR (125 MHz,  $\text{CDCl}_3$ ) d 143.7, 139.7, 139.6, 135.5, 134.8, 129.7, 129.1, 129.0, 128.8, 128.2, 128.0, 127.4, 127.3, 113.9, 109.8, 109.4, 108.2, 108.0, 68.1, 65.1, 62.8, 51.6, 40.0, 32.2, 21.4, 14.9; MS (MALDI) calcd. for  $\text{C}_{33}\text{H}_{27}\text{N}_5\text{O}_3\text{SNa}$   $[\text{M} + \text{Na}]^+$  596.17, found 596.23.

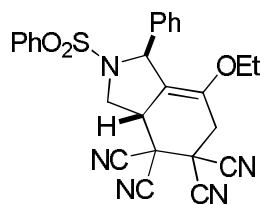

**9f**

**9f**: 58% yield; green solid; m.p. 176–177 °C; IR (film)  $\nu_{\max}$  3064, 2984, 2894, 2254, 1710, 1355, 1168  $\text{cm}^{-1}$ ;  $^1\text{H}$  NMR (500 MHz,  $\text{CDCl}_3$ ) d 7.68–7.66 (m, 2H), 7.57 (t,  $J = 7.5$  Hz, 1H), 7.45 (t,  $J = 7.5$  Hz, 2H), 7.28–7.25 (m, 5H), 5.46 (d,  $J = 1.5$  Hz, 1H), 4.23 (dd,  $J = 9.4, 7.7$  Hz, 1H), 3.89–

3.84 (m, 1H), 3.72–3.62 (m, 2H), 3.57–3.50 (m, 1H), 3.17 (dt,  $J = 17.7, 1.7$  Hz, 1H), 3.10 (ddd,  $J = 17.7, 3.4, 1.8$  Hz, 1H), 1.13 (t,  $J = 7.0$  Hz, 3H);  $^{13}\text{C}$  NMR (125 MHz,  $\text{CDCl}_3$ ) d 140.0, 138.8, 136.8, 133.3, 129.1, 128.6, 128.2, 127.4, 126.9, 115.5, 110.0, 109.6, 109.4, 107.6, 65.0, 63.3, 50.3, 42.1, 40.6, 39.3, 32.1, 14.8; MS (MALDI) calcd. for  $\text{C}_{26}\text{H}_{21}\text{N}_5\text{O}_3\text{SNa}$   $[\text{M} + \text{Na}]^+$  506.12, found 506.10; HRMS (ESI) calcd. for  $\text{C}_{26}\text{H}_{25}\text{N}_6\text{O}_3\text{S}$   $[\text{M} + \text{NH}_4]^+$  501.1709, found 501.1715.

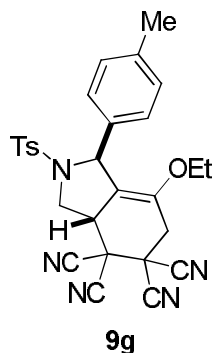

**9g**: 37% yield; yellow solid; m.p. 114–115 °C; IR (film)  $\nu_{\text{max}}$  3027, 2984, 2921, 2255, 1710, 1353, 1165  $\text{cm}^{-1}$ ;  $^1\text{H}$  NMR (500 MHz,  $\text{CDCl}_3$ ) d 7.58 (d,  $J = 8.2$  Hz, 2H), 7.49 (d,  $J = 8.2$  Hz, 2H), 7.17 (d,  $J = 8.0$  Hz, 2H), 7.09 (d,  $J = 8.0$  Hz, 2H), 5.37 (s, 1H), 4.21 (dd,  $J = 9.2, 7.7$  Hz, 1H), 3.89–3.86 (m, 1H), 3.70–3.60 (m, 2H), 3.46 (t,  $J = 9.2$  Hz, 1H), 3.17 (d,  $J = 17.8$  Hz, 1H), 3.07 (d,  $J = 17.8$  Hz, 1H), 2.40 (s, 3H), 2.31 (s, 3H), 1.11 (t,  $J = 7.0$  Hz, 3H);  $^{13}\text{C}$  NMR (125 MHz,  $\text{CDCl}_3$ ) d 144.4, 139.9, 137.8, 136.2, 133.5, 129.7, 129.2, 127.6, 126.8, 115.6, 110.1, 109.8, 109.4, 107.7, 65.0, 63.1, 50.4, 42.0, 40.7, 39.4, 31.9, 21.5, 21.0, 14.8; MS (MALDI) calcd. for  $\text{C}_{28}\text{H}_{25}\text{N}_5\text{O}_3\text{SNa}$   $[\text{M} + \text{Na}]^+$  534.16, found 534.20.

### General Procedure for the Synthesis of 10a- d

Toluene (2.0 mL) was added to a mixture of the diene (**5**, 0.5 mmol) and 2,6-dichlorobenzoquinone or benzoquinone (4.0 eq.) under an Ar atmosphere. The mixture was then stirred at 80 °C. After the reaction had reached completion (2–5 h, TLC), the mixture was concentrated and the crude residue purified through flash column chromatography ( $\text{SiO}_2$ ; 25% EtOAc in hexanes) to afford the product.



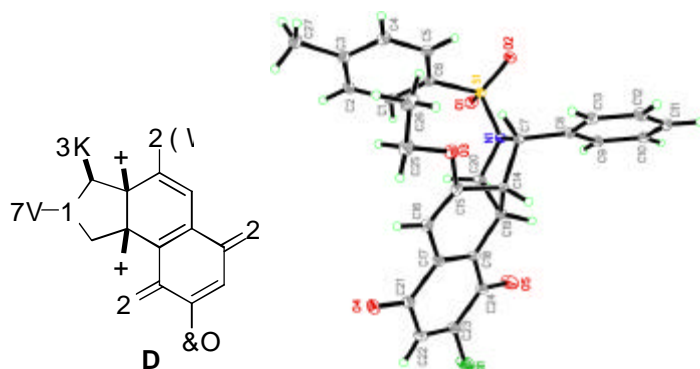

**10a:** 60% yield; deep-blue solid; m.p. 152–153 °C; IR (film)  $\nu_{\max}$  3070, 2985, 2939, 1659, 1551, 1165  $\text{cm}^{-1}$ ;  $^1\text{H}$  NMR (500 MHz,  $\text{CDCl}_3$ ) d 7.64 (d,  $J = 8.2$  Hz, 2H), 7.41 (d,  $J = 7.4$  Hz, 2H), 7.35 (d,  $J = 7.4$  Hz, 2H), 7.28–7.23 (m, 3H), 6.86 (s, 1H), 5.45 (d,  $J = 1.3$  Hz, 1H), 5.41 (s, 1H), 4.00 (dd,  $J = 9.3, 8.3$  Hz, 1H), 3.90 (qd,  $J = 7.0, 2.4$  Hz, 1H), 3.77 (td,  $J = 9.8, 8.3$  Hz, 1H), 3.59 (qd,  $J = 7.0, 2.4$  Hz, 1H), 3.18 (t,  $J = 9.8$  Hz, 1H), 3.08 (d,  $J = 9.3$  Hz, 1H), 2.41 (s, 3H), 1.39 (t,  $J = 7.0$  Hz, 3H);  $^{13}\text{C}$  NMR (125 MHz,  $\text{CDCl}_3$ ) d 183.4, 177.4, 163.8, 144.9, 143.6, 141.9, 137.9, 134.4, 132.1, 129.4, 128.5, 127.6, 127.4, 126.6, 125.9, 89.1, 65.9, 65.1, 53.1, 51.6, 34.4, 21.5, 14.0; MS (MALDI) calcd. for  $\text{C}_{27}\text{H}_{24}\text{ClNO}_5\text{SNa}$   $[\text{M} + \text{Na}]^+$  532.10, found 532.08; HRMS (ESI) calcd. for  $\text{C}_{27}\text{H}_{25}\text{ClNO}_5\text{S}$   $[\text{M} + \text{H}]^+$  510.1142, found 510.1153.

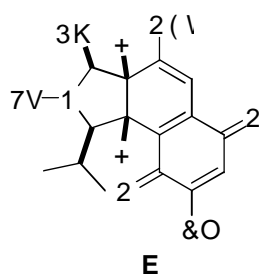

**10b:** 68% yield; deep-blue solid; m.p. 224–225 °C; IR (film)  $\nu_{\max}$  3060, 2980, 2929, 1658, 1538, 1165  $\text{cm}^{-1}$ ;  $^1\text{H}$  NMR (500 MHz,  $\text{CDCl}_3$ ) d 7.57 (d,  $J = 8.2$  Hz, 2H), 7.40–7.34 (m, 4H), 7.31–7.28 (m, 1H), 7.17 (d,  $J = 7.9$  Hz, 2H), 6.70 (s, 1H), 5.48 (s, 1H), 4.45 (d,  $J = 9.6$  Hz, 1H), 4.29 (d,  $J = 8.4$  Hz, 1H), 3.87 (q,  $J = 7.0$  Hz, 2H), 3.46 (d,  $J = 9.3$  Hz, 1H), 3.01 (t,  $J = 9.4$  Hz, 1H), 2.34 (s, 3H), 2.11–2.04 (m, 1H), 1.36 (d,  $J = 6.9$  Hz, 3H), 1.25 (d,  $J = 6.6$  Hz, 3H), 1.12 (t,  $J = 7.0$  Hz, 3H);  $^{13}\text{C}$  NMR (125 MHz,  $\text{CDCl}_3$ ) d 183.0, 177.9, 167.1, 145.5, 143.6, 141.4, 139.1, 133.8, 130.9, 129.4, 128.3, 127.6, 126.6, 126.1, 87.9, 73.6, 72.0, 64.8, 50.0, 43.8, 35.0, 21.2, 20.9, 20.0, 13.7; MS (MALDI) calcd. for  $\text{C}_{30}\text{H}_{30}\text{ClNO}_5\text{SNa}$   $[\text{M} + \text{Na}]^+$  574.14, found 574.10.

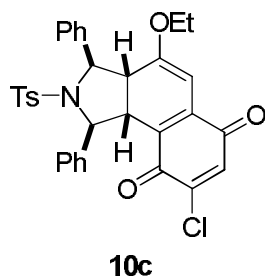

**10c:** 50% yield; deep-blue solid; m.p. 102–103 °C; IR (film)  $\nu_{\max}$  3063, 3027, 2983, 1659, 1542, 1166  $\text{cm}^{-1}$ ;  $^1\text{H}$  NMR (500 MHz,  $\text{CDCl}_3$ ) d 7.59 (d,  $J = 7.5$  Hz, 2H), 7.52–7.48 (m, 4H), 7.43 (t,  $J = 7.5$  Hz, 2H), 7.35–7.29 (m, 4H), 7.18 (d,  $J = 8.0$  Hz, 2H), 6.80 (s, 1H), 5.57 (s, 1H), 5.31 (d,  $J = 4.0$  Hz, 1H), 4.84 (d,  $J = 7.4$  Hz, 1H), 3.92 (qd,  $J = 7.0, 2.4$  Hz, 1H), 3.80 (t,  $J = 8.0$  Hz, 1H), 3.73 (qd,  $J = 7.0, 2.4$  Hz, 1H), 3.17 (dd,  $J = 8.5, 4.3$  Hz, 1H), 2.39 (s, 3H), 1.30 (t,  $J = 7.0$  Hz, 3H);  $^{13}\text{C}$  NMR (125 MHz,  $\text{CDCl}_3$ ) d 183.2, 176.7, 165.3, 145.0, 143.6, 141.3, 139.6, 138.6, 133.8, 131.6, 129.2, 128.5, 128.2, 128.1, 128.0, 127.6, 127.2, 126.7, 125.6, 88.9, 68.9, 68.7, 65.2, 50.1, 45.6, 21.5, 14.0; MS (MALDI) calcd. for  $\text{C}_{33}\text{H}_{28}\text{ClNO}_5\text{SNa}$   $[\text{M} + \text{Na}]^+$  608.13, found 608.17.

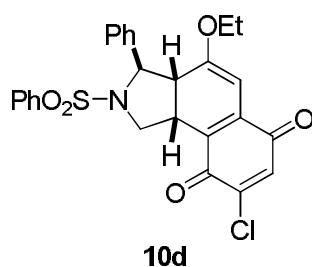

**10d:** 52% yield; deep-blue solid; m.p. 128–129 °C; IR (film)  $\nu_{\max}$  3060, 2983, 2936, 1658, 1549, 1348, 1166  $\text{cm}^{-1}$ ;  $^1\text{H}$  NMR (500 MHz,  $\text{CDCl}_3$ ) d 7.77–7.75 (m, 2H), 7.59–7.55 (m, 1H), 7.46 (t,  $J = 7.8$  Hz, 2H), 7.40 (d,  $J = 7.3$  Hz, 2H), 7.36 (t,  $J = 7.8$  Hz, 2H), 7.27 (t,  $J = 7.3$  Hz, 1H), 6.86 (s, 1H), 5.47 (s, 1H), 5.45 (d,  $J = 1.5$  Hz, 1H), 4.02 (dd,  $J = 9.1, 8.4$  Hz, 1H), 3.89 (qd,  $J = 7.0, 2.4$  Hz, 1H), 3.79 (td,  $J = 9.8, 7.4$  Hz, 1H), 3.59 (qd,  $J = 7.0, 2.4$  Hz, 1H), 3.16 (t,  $J = 9.8$  Hz, 1H), 3.09 (d,  $J = 9.2$  Hz, 1H), 1.04 (t,  $J = 7.0$  Hz, 3H);  $^{13}\text{C}$  NMR (125 MHz,  $\text{CDCl}_3$ ) d 183.2, 177.4, 163.6, 144.8, 141.7, 137.9, 137.2, 132.7, 132.2, 128.7, 128.5, 127.5, 127.4, 126.5, 125.8, 89.1, 65.8, 65.1, 53.0, 51.6, 34.1, 14.1; MS (MALDI) calcd. for  $\text{C}_{26}\text{H}_{22}\text{ClNO}_5\text{SNa}$   $[\text{M} + \text{Na}]^+$  518.08, found 518.04.

## Compound 10e

A solution of the diene **5a** (0.5 mmol) and benzoquinone (4.0 eq.) in toluene (2.0 mL) was stirred at 80 °C under Ar. After the reaction had reached completion (TLC), the mixture was concentrated and the crude product dissolved in a minimal amount of CHCl<sub>3</sub>. Silica gel (2 g) purged in triethylamine was added and the mixture stirred at room temperature overnight.<sup>1</sup> After evaporating the solvent, the crude residue was purified through flash column chromatography (SiO<sub>2</sub>; 20% EtOAc in hexanes) to afford the product.

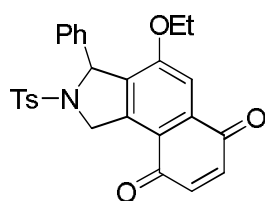

**10e**

**10e**: 56% yield; yellow solid; decomposed at 180 °C; IR (film)  $\nu_{\max}$  3062, 2985, 2931, 1666, 1589, 1335, 1088 cm<sup>-1</sup>; <sup>1</sup>H NMR (500 MHz, CDCl<sub>3</sub>) d 7.45 (d,  $J$  = 8.2 Hz, 2H), 7.34 (s, 1H), 7.21–7.10 (m, 7H), 6.90 (t,  $J$  = 2.5 Hz, 2H), 6.11 (d,  $J$  = 2.9 Hz, 1H), 5.28 (d,  $J$  = 16.8 Hz, 1H), 5.11 (dd,  $J$  = 16.8, 3.1 Hz, 1H), 4.09 (qd,  $J$  = 7.0, 2.3 Hz, 1H), 3.93 (qd,  $J$  = 7.0, 2.3 Hz, 1H), 2.33 (s, 3H), 1.19 (t,  $J$  = 7.0 Hz, 3H); <sup>13</sup>C NMR (125 MHz, CDCl<sub>3</sub>) d 184.55, 184.54, 157.8, 143.0, 139.8, 139.5, 138.8, 137.8, 135.9, 135.5, 134.7, 129.3, 128.0, 127.8, 127.7, 127.0, 120.2, 108.6, 66.6, 64.6, 54.9, 21.3, 14.0; MS (MALDI) calcd. for C<sub>27</sub>H<sub>24</sub>NO<sub>5</sub>S [M + H]<sup>+</sup> 474.14, found 474.12; HRMS (ESI) calcd. for C<sub>27</sub>H<sub>25</sub>NO<sub>5</sub>S [M + H]<sup>+</sup> 474.1375, found 474.1368.

## General Procedure for the Synthesis of 11

A solution of 5–15% MeOH in DCM (1.5 mL) was added to a mixture of the diene (**6**, 0.5 mmol) and maleimide (4.0 eq.) under an Ar atmosphere and then the mixture was stirred at room temperature. After the reaction had reached completion (16–48 h, TLC), the mixture was concentrated and the crude residue purified through flash column chromatography (SiO<sub>2</sub>; 30–50% EtOAc in hexanes) to afford the product.

<sup>1</sup> Kaliappan, K. P.; Ravikumar, V. *Org. Biomol. Chem.* **2005**, *3*, 848.

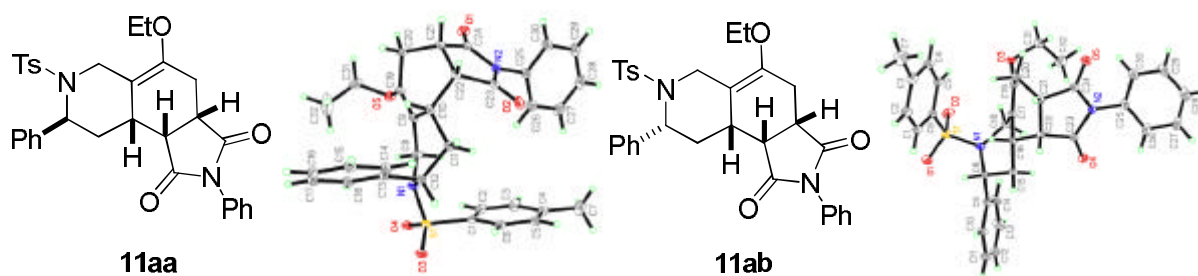

84% yield; dr = 2:1 (**11aa**:**11ab**)

**11aa**: white solid; m.p. 196–197 °C; IR (film)  $\nu_{\max}$  3062, 2977, 1709, 1384, 1161, 693  $\text{cm}^{-1}$ ;  $^1\text{H}$  NMR (500 MHz,  $\text{CDCl}_3$ )  $\delta$  7.66 (d,  $J = 8.2$  Hz, 2H), 7.46–7.42 (m, 2H), 7.40–7.37 (m, 1H), 7.31–7.30 (m, 4H), 7.26–7.22 (m, 3H), 7.11–7.08 (m, 2H), 5.15 (dd,  $J = 4.7, 2.8$  Hz, 1H), 4.69 (d,  $J = 13.6$  Hz, 1H), 3.84 (qd,  $J = 7.0, 2.6$  Hz, 1H), 3.77 (qd,  $J = 7.0, 2.6$  Hz, 1H), 3.46 (d,  $J = 13.6$  Hz, 1H), 3.20 (t,  $J = 7.1$  Hz, 1H), 2.98–2.74 (m, 2H), 2.51 (td,  $J = 13.6, 4.9$  Hz, 1H), 2.39 (s, 3H), 2.26–2.17 (m, 2H), 2.12–2.08 (m, 1H), 1.26 (t,  $J = 7.0$  Hz, 3H);  $^{13}\text{C}$  NMR (125 MHz,  $\text{CDCl}_3$ )  $\delta$  177.8, 176.3, 147.3, 143.4, 141.8, 134.9, 131.5, 129.6, 129.1, 128.7, 128.2, 127.3, 126.8, 126.2, 126.1, 111.3, 64.6, 56.6, 42.5, 40.4, 39.6, 30.7, 29.7, 24.9, 21.4, 15.2; MS (MALDI) calcd. for  $\text{C}_{32}\text{H}_{32}\text{N}_2\text{O}_5\text{SNa}$   $[\text{M} + \text{Na}]^+$  579.19, found 579.05; HRMS (ESI) calcd. for  $\text{C}_{32}\text{H}_{33}\text{N}_2\text{O}_5\text{S}$   $[\text{M} + \text{H}]^+$  557.2110, found 557.2102.

**11ab**: white solid; m.p. 139–140 °C; IR (film)  $\nu_{\max}$  3062, 2978, 1713, 1381, 1165, 694  $\text{cm}^{-1}$ ;  $^1\text{H}$  NMR (500 MHz,  $\text{CDCl}_3$ )  $\delta$  7.71 (d,  $J = 8.2$  Hz, 2H), 7.46 (t,  $J = 7.6$  Hz, 2H), 7.38–7.31 (m, 5H), 7.25–7.21 (m, 3H), 7.18–7.16 (m, 2H), 5.05 (d,  $J = 16.1$  Hz, 1H), 4.61 (dd,  $J = 11.8, 6.1$  Hz, 1H), 3.91 (qd,  $J = 7.0, 2.6$  Hz, 1H), 3.76 (d,  $J = 16.1$  Hz, 1H), 3.70 (qd,  $J = 7.0, 2.6$  Hz, 1H), 3.20–3.16 (m, 1H), 3.06 (dd,  $J = 8.9, 6.8$  Hz, 1H), 2.89 (d,  $J = 15.5$  Hz, 1H), 2.46 (s, 3H), 2.33–2.26 (m, 2H), 1.80–1.70 (m, 2H), 1.30 (t,  $J = 7.0$  Hz, 3H);  $^{13}\text{C}$  NMR (125 MHz,  $\text{CDCl}_3$ )  $\delta$  178.0, 175.8, 146.6, 143.4, 142.8, 136.1, 131.5, 129.0, 128.9, 128.6, 128.4, 127.6, 127.1, 126.1, 125.6, 112.2, 64.5, 59.1, 42.3, 39.8, 39.4, 33.7, 33.2, 24.2, 21.5, 15.3; MS (MALDI) calcd. for  $\text{C}_{32}\text{H}_{32}\text{N}_2\text{O}_5\text{SNa}$   $[\text{M} + \text{Na}]^+$  579.19, found 579.23; HRMS (ESI) calcd. for  $\text{C}_{32}\text{H}_{33}\text{N}_2\text{O}_5\text{S}$   $[\text{M} + \text{H}]^+$  557.2110, found 557.2112.

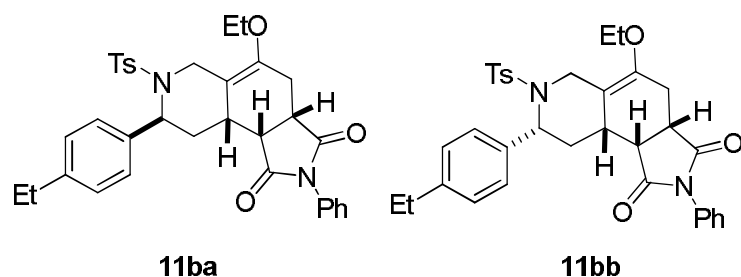

80% yield; dr = 1.3:1 (**11ba**:**11bb**)

**11ba**: yellow solid; m.p. 110–111 °C; IR (film)  $\nu_{\max}$  2965, 2927, 1712, 1383, 1157, 664  $\text{cm}^{-1}$ ;  $^1\text{H}$  NMR (500 MHz, acetone- $d_6$ )  $\delta$  7.75 (d,  $J = 8.0$  Hz, 2H), 7.47 (t,  $J = 7.8$  Hz, 2H), 7.42–7.38 (m, 3H), 7.33 (d,  $J = 7.9$  Hz, 2H), 7.20 (d,  $J = 7.9$  Hz, 2H), 7.15 (d,  $J = 7.8$  Hz, 2H), 5.26 (s, 1H), 4.65 (d,  $J = 13.6$  Hz, 1H), 3.90 (qd,  $J = 7.0, 3.0$  Hz, 1H), 3.81 (qd,  $J = 7.0, 3.0$  Hz, 1H), 3.59 (d,  $J = 13.6$  Hz, 1H), 3.36 (t,  $J = 7.3$  Hz, 1H), 3.10 (dd,  $J = 8.5, 6.5$  Hz, 1H), 2.88 (d,  $J = 15.5$  Hz, 1H), 2.66 (q,  $J = 7.6$  Hz, 2H), 2.48–2.42 (m, 1H), 2.40 (s, 3H), 2.30–2.22 (m, 2H), 2.17–2.12 (m, 1H), 1.26 (t,  $J = 7.6$  Hz, 3H), 1.25 (t,  $J = 7.0$  Hz, 3H);  $^{13}\text{C}$  NMR (125 MHz, acetone- $d_6$ )  $\delta$  177.9, 176.4, 147.6, 143.3, 142.3, 139.6, 135.5, 132.6, 129.6, 128.6, 128.0, 127.4, 127.3, 126.6, 126.3, 111.3, 64.1, 56.4, 42.5, 40.6, 39.8, 30.3, 29.5, 28.0, 24.6, 20.5, 15.1, 14.8; MS (MALDI) calcd. for  $\text{C}_{34}\text{H}_{36}\text{N}_2\text{O}_5\text{SNa}$  [ $\text{M} + \text{Na}$ ] $^+$  607.22, found 607.23; HRMS (ESI) calcd. for  $\text{C}_{34}\text{H}_{37}\text{N}_2\text{O}_5\text{S}$  [ $\text{M} + \text{H}$ ] $^+$  585.2423, found 585.2413.

**11bb**: white solid; m.p. 103–104 °C; IR (film)  $\nu_{\max}$  2966, 2924, 1709, 1384, 1159, 692  $\text{cm}^{-1}$ ;  $^1\text{H}$  NMR (500 MHz, acetone- $d_6$ )  $\delta$  7.77 (d,  $J = 8.1$  Hz, 2H), 7.45–7.36 (m, 7H), 7.22–7.19 (m, 4H), 4.99 (d,  $J = 16.2$  Hz, 1H), 4.67 (t,  $J = 9.0$  Hz, 1H), 3.94–3.88 (m, 2H), 3.72 (qd,  $J = 7.0, 3.0$  Hz, 1H), 3.30 (t,  $J = 7.2$  Hz, 1H), 3.16 (dd,  $J = 8.8, 7.1$  Hz, 1H), 2.80 (d,  $J = 15.4$  Hz, 1H), 2.65 (q,  $J = 7.6$  Hz, 2H), 2.47 (s, 3H), 2.30–2.27 (m, 2H), 2.09–2.07 (m, 2H), 1.26 (t,  $J = 7.0$  Hz, 3H), 1.24 (t,  $J = 7.6$  Hz, 3H);  $^{13}\text{C}$  NMR (125 MHz, acetone- $d_6$ )  $\delta$  178.1, 175.9, 146.7, 143.0, 142.5, 142.1, 136.4, 132.6, 128.9, 128.6, 128.0, 127.53, 127.50, 126.6, 125.7, 112.0, 63.9, 59.0, 42.32, 40.0, 39.3, 33.5, 33.4, 28.1, 23.9, 20.5, 15.2, 14.8; MS (MALDI) calcd. for  $\text{C}_{34}\text{H}_{36}\text{N}_2\text{O}_5\text{SNa}$  [ $\text{M} + \text{Na}$ ] $^+$  607.22, found 607.17; HRMS (ESI) calcd. for  $\text{C}_{34}\text{H}_{37}\text{N}_2\text{O}_5\text{S}$  [ $\text{M} + \text{H}$ ] $^+$  585.2423, found 585.2408.

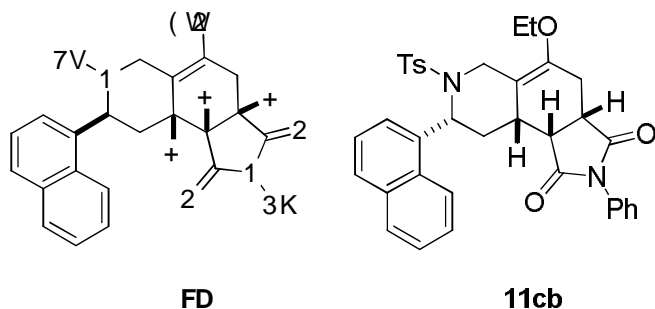

67% yield; dr = 2.5:1 (**11ca**:**11cb**)

**11ca**: yellow solid; m.p. 154–155 °C; IR (film)  $\nu_{\max}$  3060, 2974, 1709, 1386, 1161, 654  $\text{cm}^{-1}$ ;  $^1\text{H}$  NMR (500 MHz, acetone- $d_6$ )  $\delta$  8.22 (d,  $J = 8.5$  Hz, 1H), 7.87 (d,  $J = 8.1$  Hz, 1H), 7.76–7.71 (m, 3H), 7.57 (t,  $J = 7.9$  Hz, 2H), 7.48 (t,  $J = 7.4$  Hz, 1H), 7.41–7.30 (m, 6H), 7.08 (d,  $J = 8.7$  Hz, 2H), 6.04 (s, 1H), 4.89 (d,  $J = 13.2$  Hz, 1H), 3.88 (qd,  $J = 7.0, 3.0$  Hz, 1H), 3.77 (qd,  $J = 7.0, 3.0$  Hz, 1H), 3.43 (d,  $J = 13.2$  Hz, 1H), 3.14–3.10 (m, 1H), 2.82–2.77 (m, 2H), 2.67 (td,  $J = 13.9, 5.0$  Hz, 1H), 2.38 (s, 3H), 2.20–2.10 (m, 2H), 2.03–2.01 (m, 1H), 1.23 (t,  $J = 7.0$  Hz, 3H);  $^{13}\text{C}$  NMR (125 MHz, acetone- $d_6$ )  $\delta$  178.0, 176.5, 148.1, 143.5, 138.0, 135.0, 133.9, 132.6, 129.8, 129.6, 128.9, 128.6, 128.1, 127.4, 127.3, 126.7, 126.2, 125.4, 124.9, 124.6, 122.6, 111.4, 64.3, 53.8, 42.7, 40.7, 39.9, 30.2, 29.0, 25.1, 20.5, 14.8; MS (MALDI) calcd. for  $\text{C}_{36}\text{H}_{34}\text{N}_2\text{O}_5\text{SNa}$  [ $\text{M} + \text{Na}$ ] $^+$  629.21, found 629.19; HRMS (ESI) calcd. for  $\text{C}_{36}\text{H}_{38}\text{N}_3\text{O}_5\text{S}$  [ $\text{M} + \text{NH}_4$ ] $^+$  624.2532, found 624.2496.

**11cb**: white solid; decomposed at 230 °C; IR (film)  $\nu_{\max}$  3060, 2977, 1708, 1385, 1159, 692  $\text{cm}^{-1}$ ;  $^1\text{H}$  NMR (500 MHz, acetone- $d_6$ )  $\delta$  8.24 (d,  $J = 8.4$  Hz, 1H), 7.92 (d,  $J = 8.0$  Hz, 1H), 7.78–7.77 (m, 4H), 7.56–7.48 (m, 3H), 7.40–7.28 (m, 5H), 7.10 (d,  $J = 7.5$  Hz, 2H), 5.46 (dd,  $J = 12.4, 5.1$  Hz, 1H), 5.07 (d,  $J = 16.2$  Hz, 1H), 4.05 (d,  $J = 16.2$  Hz, 1H), 3.88 (qd,  $J = 7.0, 2.8$  Hz, 1H), 3.69 (qd,  $J = 7.0, 2.8$  Hz, 1H), 3.31–3.27 (m, 1H), 3.17 (dd,  $J = 8.7, 7.1$  Hz, 1H), 2.78 (d,  $J = 17.0$  Hz, 1H, overlap with  $\text{H}_2\text{O}/\text{HDO}$  peak), 2.54 (dt,  $J = 14.3, 4.1$  Hz, 1H), 2.45 (s, 3H), 2.22 (dd,  $J = 26.9, 13.6$  Hz, 1H), 1.97–1.94 (m, 1H), 1.75–1.70 (m, 1H), 1.24 (t,  $J = 7.0$  Hz, 3H);  $^{13}\text{C}$  NMR (125 MHz, acetone- $d_6$ )  $\delta$  178.1, 175.8, 146.8, 143.1, 140.8, 136.2, 133.8, 132.6, 129.7, 129.0, 128.7, 128.5, 128.0, 127.6, 127.1, 126.6, 126.0, 125.6, 125.2, 123.0, 122.4, 112.2, 63.9, 56.0, 42.3, 40.0, 39.7, 33.8, 32.9, 23.9, 20.5, 14.8; MS (MALDI) calcd. for  $\text{C}_{36}\text{H}_{34}\text{N}_2\text{O}_5\text{SNa}$  [ $\text{M} + \text{Na}$ ] $^+$  629.21, found 629.24; HRMS (ESI) calcd. for  $\text{C}_{36}\text{H}_{35}\text{N}_2\text{O}_5\text{S}$  [ $\text{M} + \text{H}$ ] $^+$  607.2266, found 607.2220.

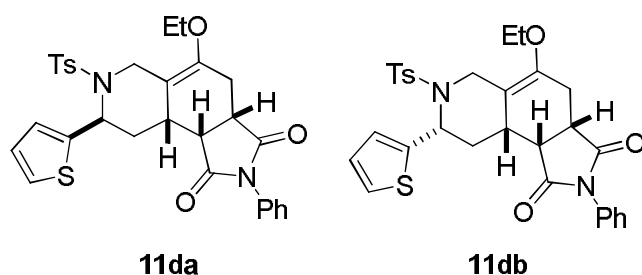

80% yield; dr = 6:1 (**11da**:**11db**)

**11da**: white solid; m.p. 189–190 °C; IR (film)  $\nu_{\max}$  2974, 1709, 1383, 1161, 667  $\text{cm}^{-1}$ ;  $^1\text{H}$  NMR (500 MHz,  $\text{CDCl}_3$ ) d 7.66 (d,  $J = 6.7$  Hz, 2H), 7.46–7.43 (m, 2H), 7.40–7.37 (m, 1H), 7.22 (d,  $J = 7.6$  Hz, 2H), 7.18–7.17 (m, 1H), 7.10 (d,  $J = 7.6$  Hz, 2H), 6.94–6.93 (m, 2H), 5.44 (s, 1H), 4.41 (d,  $J = 14.2$  Hz, 1H), 3.85–3.72 (m, 3H), 3.26–3.22 (m, 1H), 3.09–3.05 (m, 1H), 2.94 (dd,  $J = 15.8, 3.8$  Hz, 1H), 2.56–2.52 (m, 1H), 2.40–2.33 (m, 4H), 2.25–2.16 (m, 2H), 1.23 (td,  $J = 7.0, 1.6$  Hz, 3H);  $^{13}\text{C}$  NMR (125 MHz,  $\text{CDCl}_3$ ) d 177.6, 176.3, 147.1, 145.7, 143.6, 135.1, 131.5, 129.6, 129.0, 128.6, 127.3, 126.9, 126.2, 124.3, 124.2, 110.4, 64.5, 53.1, 42.2, 40.3, 39.6, 31.2, 30.0, 24.3, 21.4, 15.2; MS (MALDI) calcd. for  $\text{C}_{30}\text{H}_{30}\text{N}_2\text{O}_5\text{S}_2\text{Na}$   $[\text{M} + \text{Na}]^+$  585.15, found 585.18; HRMS (ESI) calcd. for  $\text{C}_{30}\text{H}_{31}\text{N}_2\text{O}_5\text{S}_2$   $[\text{M} + \text{H}]^+$  563.1674, found 563.1896.

**11db**: semi-solid; IR (film)  $\nu_{\max}$  2977, 1709, 1384, 1158, 658  $\text{cm}^{-1}$ ;  $^1\text{H}$  NMR (400 MHz,  $\text{CDCl}_3$ ) d 7.67 (d,  $J = 8.2$  Hz, 2H), 7.44–7.33 (m, 3H), 7.22 (d,  $J = 8.0$  Hz, 2H), 7.18–7.12 (m, 3H), 7.06 (d,  $J = 3.4$  Hz, 1H), 6.93 (dd,  $J = 5.0, 3.4$  Hz, 1H), 4.96 (dd,  $J = 10.4, 7.6$  Hz, 1H), 4.85 (d,  $J = 16.2$  Hz, 1H), 3.85 (qd,  $J = 7.0, 2.7$  Hz, 1H), 3.67–3.59 (m, 2H), 3.16–3.11 (m, 1H), 3.03 (dd,  $J = 9.0, 6.8$  Hz, 1H), 2.82 (d,  $J = 15.3$  Hz, 1H), 2.41 (s, 3H), 2.41–2.38 (m, 2H), 1.71–1.60 (m, 2H), 1.23 (t,  $J = 7.0$  Hz, 3H);  $^{13}\text{C}$  NMR (100 MHz,  $\text{CDCl}_3$ ) d 178.1, 176.0, 147.3, 147.3, 143.1, 136.3, 131.6, 129.15, 129.13, 128.8, 127.7, 126.7, 126.2, 124.1, 123.9, 112.0, 64.6, 54.7, 42.3, 39.8, 38.7, 33.1, 33.0, 24.3, 21.6, 15.4; MS (MALDI) calcd. for  $\text{C}_{30}\text{H}_{30}\text{N}_2\text{O}_5\text{S}_2\text{Na}$   $[\text{M} + \text{Na}]^+$  585.15, found 585.13; HRMS (ESI) calcd. for  $\text{C}_{30}\text{H}_{31}\text{N}_2\text{O}_5\text{S}_2$   $[\text{M} + \text{H}]^+$  563.1674, found 563.1671.

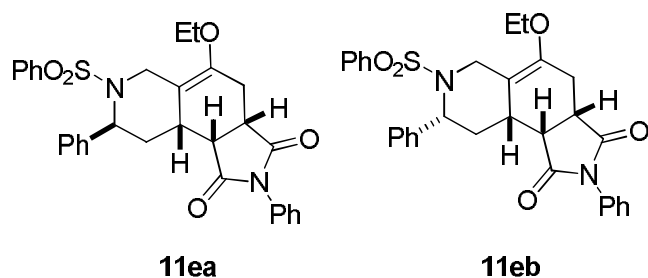

70% yield; dr = 2:1 (**11ea:11eb**)

**11ea**: semi-solid; IR (film)  $\nu_{\max}$  3061, 2919, 1712, 1384, 1159, 691  $\text{cm}^{-1}$ ;  $^1\text{H}$  NMR (500 MHz,  $\text{CDCl}_3$ ) d 7.80 (d,  $J = 7.2$  Hz, 2H), 7.60–7.39 (m, 6H), 7.34–7.22 (m, 5H), 7.13 (d,  $J = 7.5$  Hz, 2H), 5.24 (dd,  $J = 4.4, 2.8$  Hz, 1H), 4.76 (d,  $J = 13.6$  Hz, 1H), 3.91–3.77 (m, 2H), 3.55 (d,  $J = 13.6$  Hz, 1H), 3.21 (t,  $J = 7.3$  Hz, 1H), 2.98–2.94 (m, 2H), 2.59 (td,  $J = 13.6, 4.7$  Hz, 1H), 2.25–2.13 (m, 3H), 1.29 (t,  $J = 7.0$  Hz, 3H);  $^{13}\text{C}$  NMR (125 MHz,  $\text{CDCl}_3$ ) d 177.8, 176.3, 147.5, 141.6, 138.0, 132.6, 131.6, 129.0, 128.9, 128.6, 128.2, 127.2, 126.9, 126.2, 126.1, 111.0, 64.6, 56.7, 42.5, 40.4, 39.7, 30.8, 29.7, 24.9, 15.2; MS (MALDI) calcd. for  $\text{C}_{31}\text{H}_{30}\text{N}_2\text{O}_5\text{SNa}$  [ $\text{M} + \text{Na}$ ] $^+$  565.18, found 565.14.

**11eb**: semi-solid; IR (film)  $\nu_{\max}$  3064, 2936, 1711, 1384, 1158, 692  $\text{cm}^{-1}$ ;  $^1\text{H}$  NMR (500 MHz,  $\text{CDCl}_3$ ) d 7.78 (d,  $J = 7.4$  Hz, 2H), 7.53 (t,  $J = 7.4$  Hz, 1H), 7.43–7.30 (m, 10H), 7.12 (d,  $J = 7.7$  Hz, 2H), 5.02 (d,  $J = 16.2$  Hz, 1H), 4.58 (dd,  $J = 11.4, 6.5$  Hz, 1H), 3.86 (qd,  $J = 7.0, 2.6$  Hz, 1H), 3.73 (d,  $J = 16.2$  Hz, 1H), 3.65 (qd,  $J = 7.0, 2.6$  Hz, 1H), 3.11 (t,  $J = 7.4$  Hz, 1H), 3.00 (dd,  $J = 8.8, 6.9$  Hz, 1H), 2.82 (d,  $J = 15.4$  Hz, 1H), 2.30–2.24 (m, 2H), 1.71–1.63 (m, 2H), 1.25 (t,  $J = 7.0$  Hz, 3H);  $^{13}\text{C}$  NMR (125 MHz,  $\text{CDCl}_3$ ) d 178.0, 175.8, 146.7, 143.2, 139.0, 132.2, 131.5, 129.0, 128.6, 128.4, 128.3, 127.5, 127.2, 126.1, 125.6, 111.8, 64.5, 59.2, 42.2, 39.7, 39.5, 33.7, 33.2, 24.2, 15.3; MS (MALDI) calcd. for  $\text{C}_{31}\text{H}_{30}\text{N}_2\text{O}_5\text{SNa}$  [ $\text{M} + \text{Na}$ ] $^+$  565.18, found 565.11; HRMS (ESI) calcd. for  $\text{C}_{31}\text{H}_{34}\text{N}_3\text{O}_5\text{S}$  [ $\text{M} + \text{NH}_4$ ] $^+$  560.2219, found 560.2226.

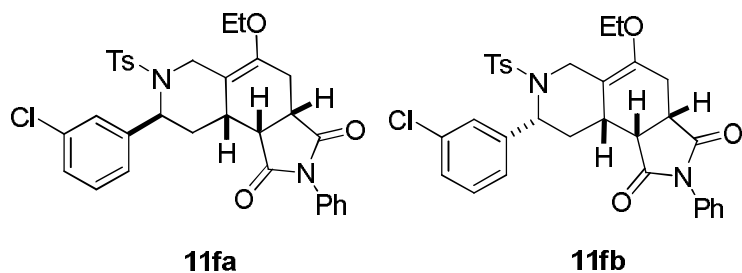

70% yield; dr = 1.4:1 (**11fa:11fb**)

**11fa**: semi-solid; IR (film)  $\nu_{\max}$  3064, 2978, 2925, 1713, 1382, 1158, 666  $\text{cm}^{-1}$ ;  $^1\text{H}$  NMR (500 MHz,  $\text{CDCl}_3$ ) d 7.63 (d,  $J = 8.2$  Hz, 2H), 7.44–7.35 (m, 3H), 7.26–7.18 (m, 6H), 7.10–7.08 (m, 2H), 5.10 (dd,  $J = 4.3, 2.9$  Hz, 1H), 4.69 (d,  $J = 13.6$  Hz, 1H), 3.85 (qd,  $J = 7.0, 2.9$  Hz, 1H), 3.78 (qd,  $J = 7.0, 2.9$  Hz, 1H), 3.42 (d,  $J = 13.6$  Hz, 1H), 3.22–3.18 (m, 1H), 2.95 (dd,  $J = 8.8, 6.3$  Hz, 2H), 2.53 (td,  $J = 13.6, 4.8$  Hz, 1H), 2.39 (s, 3H), 2.18–2.16 (m, 2H), 2.08–2.03 (m, 1H), 1.25 (t,



$J = 7.0$  Hz, 3H);  $^{13}\text{C}$  NMR (125 MHz,  $\text{CDCl}_3$ )  $\delta$  177.7, 176.2, 147.6, 144.2, 143.6, 134.7, 134.2, 131.5, 129.7, 129.6, 129.0, 128.6, 127.2, 127.1, 126.4, 126.2, 124.5, 110.8, 64.6, 56.2, 42.5, 40.4, 39.6, 30.6, 29.8, 25.0, 21.5, 15.2; MS (MALDI) calcd. for  $\text{C}_{32}\text{H}_{31}\text{ClN}_2\text{O}_5\text{SNa}$   $[\text{M} + \text{Na}]^+$  613.15, found 613.17; HRMS (ESI) calcd. for  $\text{C}_{32}\text{H}_{32}\text{ClN}_2\text{O}_5\text{S}$   $[\text{M} + \text{H}]^+$  591.1720, found 591.1721.

**11fb**: semi-solid; IR (film)  $\nu_{\text{max}}$  3061, 2921, 1712, 1384, 1158, 657  $\text{cm}^{-1}$ ;  $^1\text{H}$  NMR (500 MHz,  $\text{CDCl}_3$ )  $\delta$  7.65 (d,  $J = 8.1$  Hz, 2H), 7.41 (t,  $J = 7.4$  Hz, 2H), 7.35 (t,  $J = 7.4$  Hz, 1H), 7.31 (s, 1H), 7.24–7.18 (m, 5H), 7.12 (d,  $J = 7.4$  Hz, 2H), 5.01 (d,  $J = 16.2$  Hz, 1H), 4.51 (dd,  $J = 11.5, 6.4$  Hz, 1H), 3.86 (qd,  $J = 7.0, 2.7$  Hz, 1H), 3.71–3.62 (m, 2H), 3.15 (t,  $J = 7.4$  Hz, 1H), 3.03 (dd,  $J = 8.8, 6.8$  Hz, 1H), 2.85 (d,  $J = 15.4$  Hz, 1H), 2.41 (s, 3H), 2.30–2.16 (m, 2H), 1.74–1.65 (m, 2H), 1.25 (t,  $J = 7.0$  Hz, 3H);  $^{13}\text{C}$  NMR (125 MHz,  $\text{CDCl}_3$ )  $\delta$  177.9, 175.8, 146.8, 145.4, 143.1, 135.9, 134.3, 131.4, 129.8, 129.03, 129.00, 128.6, 127.5, 127.3, 126.1, 125.9, 123.9, 111.8, 64.6, 58.7, 42.2, 39.7, 39.4, 33.7, 33.1, 24.2, 21.5, 15.3; MS (MALDI) calcd. for  $\text{C}_{32}\text{H}_{31}\text{ClN}_2\text{O}_5\text{SNa}$   $[\text{M} + \text{Na}]^+$  613.15, found 613.10; HRMS (ESI) calcd. for  $\text{C}_{32}\text{H}_{32}\text{ClN}_2\text{O}_5\text{S}$   $[\text{M} + \text{H}]^+$  591.1720, found 591.1708.

### General Procedure for the Synthesis of 12

A solution of the diene (**6**, 0.5 mmol) in DCM (0.5 mL) was added dropwise to a solution of *N*-phenyltriazolinedione (2.0 eq.) in DCM (2.0 mL) at  $-78$  °C under an Ar atmosphere. After the reaction had reached completion (3–5 h, TLC), the mixture was concentrated and the crude residue purified through flash column chromatography ( $\text{SiO}_2$ ; 30–50% EtOAc in hexanes) to afford the product.

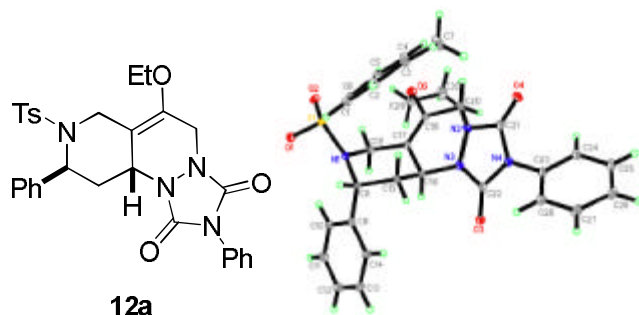

**12a:** 56% yield; white solid; m.p. 170–171 °C; IR (film)  $\nu_{\max}$  3055, 2978, 2900, 1713, 1419, 1157, 656  $\text{cm}^{-1}$ ;  $^1\text{H}$  NMR (500 MHz,  $\text{CDCl}_3$ ) d 7.82 (d,  $J = 8.2$  Hz, 2H), 7.56 (d,  $J = 8.0$  Hz, 2H), 7.49–7.45 (m, 4H), 7.40–7.33 (m, 3H), 7.30–7.28 (m, 3H), 5.40 (d,  $J = 3.7$  Hz, 1H), 5.15 (d,  $J = 15.5$  Hz, 1H), 4.39 (d,  $J = 10.3$  Hz, 1H), 4.16 (td,  $J = 15.5, 2.2$  Hz, 1H), 3.92–3.78 (m, 3H), 3.36–3.29 (m, 2H), 2.44 (s, 3H), 1.51 (td,  $J = 12.6, 4.8$  Hz, 1H), 1.34 (t,  $J = 7.0$  Hz, 3H);  $^{13}\text{C}$  NMR (125 MHz,  $\text{CDCl}_3$ ) d 152.1, 151.5, 143.5, 141.1, 137.6, 136.5, 130.8, 129.5, 129.1, 129.0, 128.2, 127.5, 127.2, 126.7, 125.1, 109.6, 65.9, 54.5, 50.8, 42.0, 38.8, 30.3, 21.5, 15.2; MS (MALDI) calcd. for  $\text{C}_{30}\text{H}_{30}\text{N}_4\text{O}_5\text{SNa}$   $[\text{M} + \text{Na}]^+$  581.18, found 581.23; HRMS (ESI) calcd. for  $\text{C}_{30}\text{H}_{31}\text{N}_4\text{O}_5\text{S}$   $[\text{M} + \text{H}]^+$  559.2015, found 559.2015.

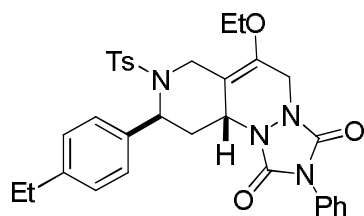

**12b**

**12b:** 60% yield; yellow solid; m.p. 110–111 °C; IR (film)  $\nu_{\max}$  2966, 2923, 1716, 1418, 1158, 663  $\text{cm}^{-1}$ ;  $^1\text{H}$  NMR (500 MHz,  $\text{CDCl}_3$ ) d 7.81 (d,  $J = 8.2$  Hz, 2H), 7.48–7.43 (m, 6H), 7.35 (t,  $J = 7.0$  Hz, 1H), 7.29 (d,  $J = 8.0$  Hz, 2H), 7.21 (d,  $J = 8.0$  Hz, 2H), 5.37 (d,  $J = 2.7$  Hz, 1H), 5.14 (d,  $J = 15.5$  Hz, 1H), 4.40 (d,  $J = 10.5$  Hz, 1H), 4.15 (d,  $J = 15.5$  Hz, 1H), 3.91–3.78 (m, 3H), 3.35 (d,  $J = 15.5$  Hz, 1H), 3.28 (d,  $J = 12.6$  Hz, 1H), 2.62 (q,  $J = 7.6$  Hz, 2H), 2.42 (s, 3H), 1.49 (td,  $J = 12.6, 4.9$  Hz, 1H), 1.33 (t,  $J = 7.0$  Hz, 3H), 1.21 (t,  $J = 7.6$  Hz, 3H);  $^{13}\text{C}$  NMR (125 MHz,  $\text{CDCl}_3$ ) d 152.1, 151.5, 143.6, 143.4, 141.0, 137.7, 133.6, 130.8, 129.4, 129.0, 128.5, 128.1, 127.2, 126.6, 125.1, 109.7, 65.9, 54.4, 50.8, 42.0, 38.8, 30.4, 28.2, 21.5, 15.4, 15.2; MS (MALDI) calcd. for  $\text{C}_{32}\text{H}_{34}\text{N}_4\text{O}_5\text{SNa}$   $[\text{M} + \text{Na}]^+$  609.21, found 609.16.

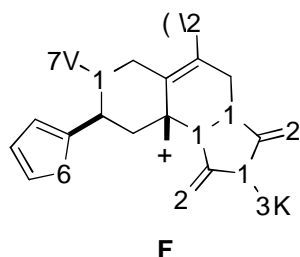

**F**

**12c:** 85% yield; yellow solid; m.p. 117–118 °C; IR (film)  $\nu_{\max}$  2980, 2930, 1716, 1420, 1160, 664  $\text{cm}^{-1}$ ;  $^1\text{H}$  NMR (500 MHz,  $\text{CDCl}_3$ ) d 7.79 (d,  $J = 8.3$  Hz, 2H), 7.48–7.42 (m, 4H), 7.36–7.33

(m, 1H), 7.28 (d,  $J = 8.1$  Hz, 2H), 7.24 (d,  $J = 5.0$  Hz, 1H), 7.09–7.08 (m, 1H), 6.95–6.94 (m, 1H), 5.52 (d,  $J = 4.1$  Hz, 1H), 5.13 (d,  $J = 15.4$  Hz, 1H), 4.56 (d,  $J = 9.8$  Hz, 1H), 4.14 (td,  $J = 15.3, 2.1$  Hz, 1H), 3.98 (d,  $J = 15.4$  Hz, 1H), 3.90–3.80 (m, 2H), 3.53 (d,  $J = 5.5$  Hz, 1H), 3.15 (ddd,  $J = 12.9, 3.9, 1.9$  Hz, 1H), 2.42 (s, 3H), 1.66 (td,  $J = 12.5, 5.1$  Hz, 1H), 1.33 (t,  $J = 7.0$  Hz, 3H);  $^{13}\text{C}$  NMR (125 MHz,  $\text{CDCl}_3$ ) d 152.0, 151.6, 143.7, 142.1, 141.4, 137.1, 130.8, 129.5, 129.1, 128.2, 127.4, 127.3, 125.8, 125.6, 125.1, 109.3, 65.9, 52.5, 50.8, 42.1, 38.8, 32.4, 21.5, 15.3; MS (MALDI) calcd. for  $\text{C}_{28}\text{H}_{28}\text{N}_4\text{O}_5\text{S}_2\text{Na}$   $[\text{M} + \text{Na}]^+$  587.14, found 587.12; HRMS (ESI) calcd. for  $\text{C}_{28}\text{H}_{32}\text{N}_5\text{O}_5\text{S}_2$   $[\text{M} + \text{NH}_4]^+$  582.1845, found 582.1837.

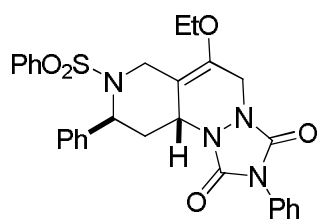

**12d**

**12d**: 70% yield; white solid; m.p. 168–169 °C; IR (film)  $\nu_{\text{max}}$  3059, 2980, 2896, 1716, 1420, 1161, 639  $\text{cm}^{-1}$ ;  $^1\text{H}$  NMR (500 MHz,  $\text{CDCl}_3$ ) d 7.95 (d,  $J = 7.5$  Hz, 2H), 7.59–7.37 (m, 12H), 7.28 (t,  $J = 7.3$  Hz, 1H), 5.43 (d,  $J = 3.2$  Hz, 1H), 5.16 (d,  $J = 15.6$  Hz, 1H), 4.39 (d,  $J = 10.3$  Hz, 1H), 4.16 (d,  $J = 15.6$  Hz, 1H), 3.89–3.79 (m, 3H), 3.37–3.29 (m, 2H), 1.47 (td,  $J = 12.6, 9.0$  Hz, 1H), 1.34 (t,  $J = 7.0$  Hz, 3H);  $^{13}\text{C}$  NMR (125 MHz,  $\text{CDCl}_3$ ) d 152.1, 151.5, 141.1, 140.6, 136.4, 132.7, 130.7, 129.1, 129.0, 128.9, 128.2, 127.6, 127.1, 126.6, 125.1, 109.4, 65.8, 54.6, 50.7, 42.0, 38.9, 30.3, 15.3; MS (MALDI) calcd. for  $\text{C}_{29}\text{H}_{28}\text{N}_4\text{O}_5\text{SNa}$   $[\text{M} + \text{Na}]^+$  567.17, found 567.15; HRMS (ESI) calcd. for  $\text{C}_{29}\text{H}_{32}\text{N}_5\text{O}_5\text{S}$   $[\text{M} + \text{NH}_4]^+$  562.2125, found 562.2115.

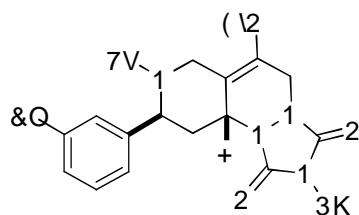

**H**

**12e**: 55% yield; white solid; m.p. 193–194 °C; IR (film)  $\nu_{\text{max}}$  3056, 2980, 2854, 1716, 1420, 1159, 665  $\text{cm}^{-1}$ ;  $^1\text{H}$  NMR (500 MHz,  $\text{CDCl}_3$ ) d 7.81 (d,  $J = 8.2$  Hz, 2H), 7.51–7.25 (m, 11H), 5.36 (s, 1H), 5.19 (d,  $J = 15.6$  Hz, 1H), 4.36 (d,  $J = 11.1$  Hz, 1H), 4.18 (d,  $J = 15.6$  Hz, 1H), 3.94–3.81 (m, 3H), 3.33 (d,  $J = 15.6$  Hz, 1H), 3.25 (ddd,  $J = 11.9, 3.5, 2.1$  Hz, 1H), 2.45 (s, 3H),

1.51 (td,  $J = 12.7, 4.7$  Hz, 1H), 1.36 (t,  $J = 7.0$  Hz, 3H);  $^{13}\text{C}$  NMR (125 MHz,  $\text{CDCl}_3$ ) d 152.1, 151.5, 143.7, 141.3, 138.9, 137.4, 135.2, 130.7, 130.2, 129.5, 129.1, 128.2, 127.8, 127.2, 127.0, 125.1, 124.7, 109.2, 65.9, 54.2, 50.6, 42.0, 38.9, 30.4, 21.5, 15.3; MS (MALDI) calcd. for  $\text{C}_{30}\text{H}_{29}\text{ClN}_4\text{O}_5\text{SNa}$   $[\text{M} + \text{Na}]^+$  615.14, found 615.19.

### General Procedure for the Synthesis of 13

A solution of the diene (**5**, 0.5 mmol) in DCM (0.5 mL) was added dropwise to a solution of tetracyanoethylene (2.0 eq.) in DCM (2.0 mL) at  $-78$  °C under an Ar atmosphere. After the reaction had reached completion (3–5 h, TLC), the mixture was concentrated and the dr ratio determined using  $^1\text{H}$  NMR spectroscopy. The crude residue was purified through flash column chromatography ( $\text{SiO}_2$ ; 25% EtOAc in hexanes) to afford the product.

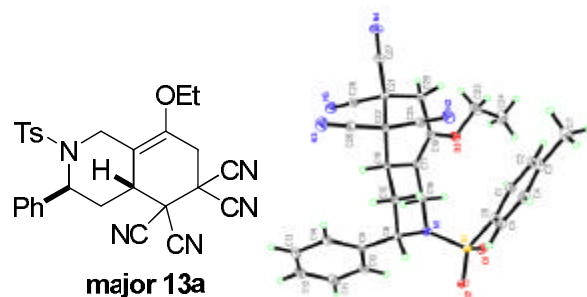

**13a**: 56% yield; dr > 10:1; white solid; IR (film)  $\nu_{\text{max}}$  3055, 2985, 2931, 1682, 1342, 1157, 663  $\text{cm}^{-1}$ ;  $^1\text{H}$  NMR (500 MHz,  $\text{CDCl}_3$ ) d 7.75 (d,  $J = 8.2$  Hz, 2H), 7.45 (d,  $J = 7.6$  Hz, 2H), 7.39–7.33 (m, 3H), 7.30 (d,  $J = 8.2$  Hz, 2H), 5.52 (d,  $J = 4.2$  Hz, 1H), 5.14 (d,  $J = 16.6$  Hz, 1H), 3.89–3.78 (m, 2H), 3.34 (dd,  $J = 16.6, 1.7$  Hz, 1H), 3.17 (d,  $J = 12.5$  Hz, 1H), 3.11–3.02 (m, 2H), 2.72 (ddd,  $J = 13.4, 4.0, 2.2$  Hz, 1H), 2.39 (s, 3H), 1.78 (td,  $J = 13.1, 1.8$  Hz, 1H), 1.36 (t,  $J = 7.0$  Hz, 3H);  $^{13}\text{C}$  NMR (125 MHz,  $\text{CDCl}_3$ ) d 144.4, 139.8, 137.0, 135.0, 130.0, 129.6, 128.1, 126.7, 126.0, 110.3, 110.1, 109.6, 109.4, 108.0, 65.5, 53.5, 43.7, 37.9, 37.7, 36.8, 31.7, 28.1, 21.4, 15.1; MS (MALDI) calcd. for  $\text{C}_{28}\text{H}_{25}\text{N}_5\text{O}_3\text{SNa}$   $[\text{M} + \text{Na}]^+$  534.16, found 534.14.

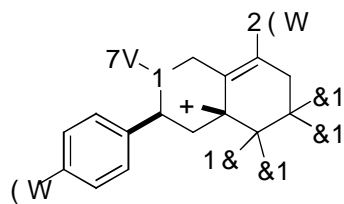

**P DNRU E**

**13b:** 70% yield; dr = 10:1 ( $^1\text{H}$  NMR); semi-solid; IR (film)  $\nu_{\text{max}}$  2967, 2929, 2252, 1683, 1352, 1161, 663  $\text{cm}^{-1}$ ;  $^1\text{H}$  NMR (500 MHz,  $\text{CDCl}_3$ ) d 7.75 (d,  $J = 8.2$  Hz, 2H), 7.58 (minor, d,  $J = 8.2$  Hz, 0.2H), 7.30–7.25 (m, 6H), 5.48 (d,  $J = 3.5$  Hz, 1H), 5.13 (d,  $J = 16.6$  Hz, 1H), 5.03 (minor, dd,  $J = 11.2, 7.1$  Hz, 0.1H), 4.94 (minor, d,  $J = 18.3$  Hz, 0.1H), 3.85–3.77 (m, 2H), 3.34 (d,  $J = 17.8$  Hz, 1H), 3.19–3.11 (m, 2H), 3.05–3.01 (m, 1H), 2.71–2.65 (m, 3H), 2.38 (s, 3H), 1.74 (td,  $J = 13.0, 5.1$  Hz, 1H), 1.34 (t,  $J = 7.0$  Hz, 3H), 1.25 (t,  $J = 7.6$  Hz, 3H);  $^{13}\text{C}$  NMR (125 MHz,  $\text{CDCl}_3$ ) d 144.5, 144.3, 139.9, 137.0, 132.1, 130.0, 129.1, 126.7, 126.1, 110.4, 110.3, 109.5, 109.4, 108.2, 65.4, 53.4, 43.8, 37.8, 37.7, 36.7, 31.5, 28.2, 28.1, 21.4, 15.3, 15.1; MS (MALDI) calcd. for  $\text{C}_{30}\text{H}_{29}\text{N}_5\text{O}_3\text{SNa}$   $[\text{M} + \text{Na}]^+$  562.19, found 562.16.

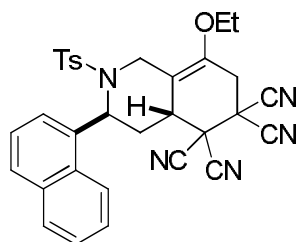

**major 13c**

**13c:** 68% yield; dr = 9.1:1 ( $^1\text{H}$  NMR); white solid; IR (film)  $\nu_{\text{max}}$  3053, 2978, 2919, 2255, 1684, 1341, 1160, 666  $\text{cm}^{-1}$ ;  $^1\text{H}$  NMR (500 MHz,  $\text{CDCl}_3$ ) d 8.22 (d,  $J = 8.5$  Hz, 1H), 7.96 (minor, d,  $J = 8.5$  Hz, 0.14H), 7.91 (d,  $J = 8.0$  Hz, 1H), 7.81 (d,  $J = 8.0$  Hz, 1H), 7.67–7.51 (m, 4H), 7.34–7.28 (m, 2H), 7.21 (d,  $J = 8.0$  Hz, 2H), 7.12 (minor, d,  $J = 8.0$  Hz, 0.28H), 6.33 (d,  $J = 5.5$  Hz, 1H), 5.72 (minor, dd,  $J = 11.6, 6.0$  Hz, 0.11H), 4.93 (d,  $J = 16.5$  Hz, 1H), 3.86–3.78 (m, 3H), 3.35 (d,  $J = 11.6$  Hz, 1H), 3.16 (s, 2H), 2.75–2.71 (m, 1H), 2.37 (s, 3H), 2.35–2.29 (m, 1H), 1.30 (t,  $J = 7.0$  Hz, 3H);  $^{13}\text{C}$  NMR (125 MHz,  $\text{CDCl}_3$ ) d 144.3, 140.2, 135.6, 134.3, 133.0, 130.2, 129.7, 129.3, 129.2, 127.3, 126.8, 126.1, 124.7, 124.6, 122.8, 110.3, 110.1, 109.6, 108.9, 108.2, 65.4, 51.7, 43.8, 39.8, 38.1, 36.7, 31.8, 31.5, 21.5, 15.1; MS (MALDI) calcd. for  $\text{C}_{32}\text{H}_{27}\text{N}_5\text{O}_3\text{SNa}$   $[\text{M} + \text{Na}]^+$  584.17, found 584.16.

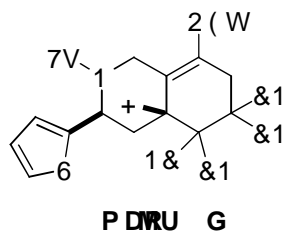

**13d:** 85% yield; dr = 3.3:1 ( $^1\text{H}$  NMR); yellow solid; IR (film)  $\nu_{\text{max}}$  2979, 2927, 2250, 1684, 1377, 1163, 664  $\text{cm}^{-1}$ ;  $^1\text{H}$  NMR (500 MHz,  $\text{CDCl}_3$ ) d 7.69 (d,  $J = 8.2$  Hz, 2H), 7.61 (minor, d,  $J = 8.2$  Hz, 0.6H), 7.31–7.22 (m, 3H), 7.02–7.01 (m, 1H), 6.96–6.94 (m, 1H), 5.66 (d,  $J = 4.1$  Hz, 1H), 5.46 (minor, dd,  $J = 10.5, 7.8$  Hz, 0.3H), 5.12 (d,  $J = 16.5$  Hz, 1H), 4.78 (minor, d,  $J = 18.2$  Hz, 0.3H), 3.91–3.79 (m, 2H), 3.52 (dd,  $J = 16.5, 1.5$  Hz, 1H), 3.36 (d,  $J = 12.5$  Hz, 1H), 3.18–3.05 (m, 2H), 2.56 (ddd,  $J = 13.2, 4.1, 1.9$  Hz, 1H), 2.38 (s, 3H), 1.89 (td,  $J = 13.0, 5.2$  Hz, 1H), 1.34 (t,  $J = 7.0$  Hz, 3H);  $^{13}\text{C}$  NMR (125 MHz,  $\text{CDCl}_3$ ) d 144.6, 140.2, 136.4, 130.1, 130.0, 127.8, 126.9, 126.4, 125.6, 110.2, 109.5, 109.4, 109.0, 108.1, 65.5, 51.6, 43.8, 37.8, 37.7, 36.9, 31.6, 30.4, 21.5, 15.1; MS (MALDI) calcd. for  $\text{C}_{26}\text{H}_{23}\text{N}_5\text{O}_3\text{S}_2\text{Na}$   $[\text{M} + \text{Na}]^+$  540.11, found 540.02.

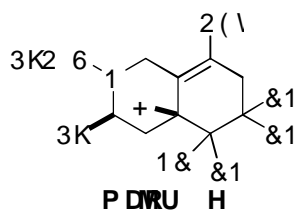

**13e:** 68% yield; dr > 10:1; white solid; IR (film)  $\nu_{\text{max}}$  3063, 2983, 2254, 1683, 1352, 1164, 640  $\text{cm}^{-1}$ ;  $^1\text{H}$  NMR (500 MHz,  $\text{CDCl}_3$ ) d 7.88 (d,  $J = 8.2$  Hz, 2H), 7.60 (t,  $J = 7.2$  Hz, 1H), 7.52 (t,  $J = 7.6$  Hz, 2H), 7.45 (t,  $J = 7.6$  Hz, 2H), 7.37–7.34 (m, 3H), 5.56 (d,  $J = 4.2$  Hz, 1H), 5.13 (d,  $J = 16.8$  Hz, 1H), 3.85 (qd,  $J = 7.0, 2.4$  Hz, 1H), 3.78 (qd,  $J = 7.0, 2.4$  Hz, 1H), 3.35 (dd,  $J = 16.6, 1.7$  Hz, 1H), 3.17 (d,  $J = 12.4$  Hz, 1H), 3.12–3.02 (m, 2H), 2.77 (ddd,  $J = 13.4, 4.0, 2.2$  Hz, 1H), 1.85 (td,  $J = 13.1, 5.1$  Hz, 1H), 1.34 (t,  $J = 7.0$  Hz, 3H);  $^{13}\text{C}$  NMR (125 MHz,  $\text{CDCl}_3$ ) d 140.0, 139.9, 134.9, 133.3, 129.6, 129.4, 128.2, 126.7, 126.0, 110.3, 110.1, 109.4, 109.3, 108.0, 65.5, 53.6, 43.7, 37.9, 37.7, 36.7, 31.6, 28.6, 15.1; MS (MALDI) calcd. for  $\text{C}_{27}\text{H}_{23}\text{N}_5\text{O}_3\text{SNa}$   $[\text{M} + \text{Na}]^+$  520.14, found 520.10.

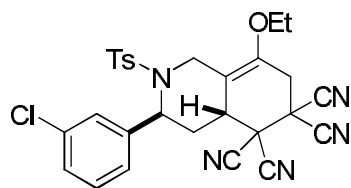

**major 13f**

**13f:** 68% yield; dr = 5.7:1 ( $^1\text{H}$  NMR); white solid; IR (film)  $\nu_{\text{max}}$  2983, 2910, 2252, 1684, 1352, 1162, 663  $\text{cm}^{-1}$ ;  $^1\text{H}$  NMR (500 MHz,  $\text{CDCl}_3$ ) d 7.74 (d,  $J = 8.2$  Hz, 2H), 7.59 (minor, d,  $J = 8.2$  Hz, 0.34H), 7.38–7.18 (m, 6H), 5.48 (d,  $J = 3.6$  Hz, 1H), 5.17 (d,  $J = 16.7$  Hz, 1H), 3.89–3.80 (m, 2H), 3.32 (d,  $J = 16.7$  Hz, 1H), 3.13–3.02 (m, 3H), 2.66–2.65 (m, 1H), 2.39 (s, 3H), 1.76 (td,  $J = 13.0, 5.1$  Hz, 1H), 1.36 (t,  $J = 7.0$  Hz, 3H);  $^{13}\text{C}$  NMR (125 MHz,  $\text{CDCl}_3$ ) d 144.8, 140.1, 137.4, 136.7, 135.9, 130.8, 130.0, 128.5, 126.8, 126.7, 123.8, 110.2, 110.1, 109.3, 109.0, 108.0, 65.5, 53.2, 43.6, 38.0, 37.7, 36.7, 31.6, 28.3, 21.4, 15.1; MS (MALDI) calcd. for  $\text{C}_{28}\text{H}_{24}\text{ClN}_5\text{O}_3\text{SNa}$   $[\text{M} + \text{Na}]^+$  568.12, found 568.15.

### General Procedure for the Synthesis of 14

A solution of the diene (**6**, 0.5 mmol) and benzoquinone (4.0 eq.) in toluene (2.0 mL) was stirred at 80 °C under Ar. After the reaction had reached completion (5–10 h, TLC), the mixture was concentrated and the crude residue purified through flash column chromatography ( $\text{SiO}_2$ ; 25% EtOAc in hexanes) to afford the product.

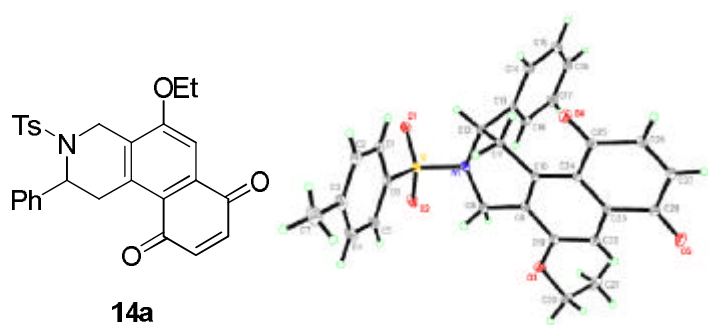

**14a**

**14a:** 63% yield; yellow solid; m.p. 204–205 °C; IR (film)  $\nu_{\text{max}}$  3055, 2985, 2931, 1659, 1581, 1319, 1103, 694  $\text{cm}^{-1}$ ;  $^1\text{H}$  NMR (500 MHz,  $\text{CDCl}_3$ ) d 7.69 (d,  $J = 8.2$  Hz, 2H), 7.38 (s, 1H), 7.21–7.15 (m, 7H), 6.84 (d,  $J = 10.1$  Hz, 1H), 6.80 (d,  $J = 10.1$  Hz, 1H), 5.48 (d,  $J = 6.2$  Hz, 1H), 4.90 (d,  $J = 18.8$  Hz, 1H), 4.20–4.11 (m, 3H), 3.95 (d,  $J = 18.8$  Hz, 1H), 3.26 (dd,  $J = 18.6, 6.2$

Hz, 1H), 2.34 (s, 3H), 1.44 (t,  $J = 7.0$  Hz, 3H);  $^{13}\text{C}$  NMR (125 MHz,  $\text{CDCl}_3$ ) d 186.1, 185.1, 158.4, 143.3, 140.7, 138.5, 137.8, 137.2, 136.0, 133.9, 129.5, 128.4, 127.8, 127.4, 127.1, 126.9, 122.2, 106.1, 64.5, 52.8, 39.2, 28.8, 21.4, 14.4; MS (MALDI) calcd. for  $\text{C}_{28}\text{H}_{26}\text{NO}_5\text{S}$   $[\text{M} + \text{H}]^+$  488.15, found 488.13.

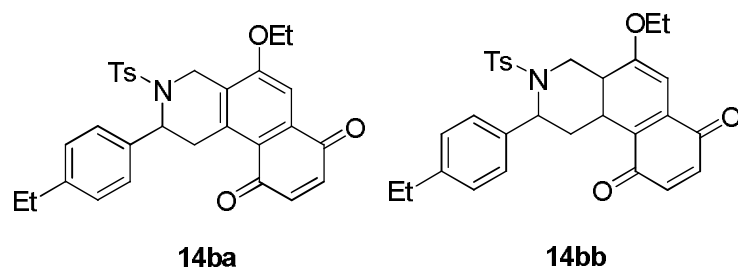

**14ba**: 30% yield; yellow solid; decomposed at 190 °C; IR (film)  $\nu_{\text{max}}$  2966, 2932, 1654, 1578, 1314, 1159, 683  $\text{cm}^{-1}$ ;  $^1\text{H}$  NMR (500 MHz,  $\text{CDCl}_3$ ) d 7.68 (d,  $J = 8.3$  Hz, 2H), 7.38 (s, 1H), 7.17 (d,  $J = 8.3$  Hz, 2H), 7.08 (d,  $J = 8.2$  Hz, 2H), 7.03 (d,  $J = 8.2$  Hz, 2H), 6.84 (d,  $J = 10.1$  Hz, 1H), 6.80 (d,  $J = 10.1$  Hz, 1H), 5.45 (d,  $J = 6.3$  Hz, 1H), 4.90 (d,  $J = 18.8$  Hz, 1H), 4.19–4.14 (m, 2H), 4.10 (d,  $J = 18.6$  Hz, 1H), 3.94 (d,  $J = 18.8$  Hz, 1H), 3.26 (dd,  $J = 18.6, 6.3$  Hz, 1H), 2.55 (q,  $J = 7.6$  Hz, 2H), 2.33 (s, 3H), 1.44 (t,  $J = 7.0$  Hz, 3H), 1.16 (t,  $J = 7.6$  Hz, 3H);  $^{13}\text{C}$  NMR (125 MHz,  $\text{CDCl}_3$ ) d 186.0, 185.1, 158.4, 143.4, 143.2, 140.7, 137.9, 137.3, 135.9, 135.6, 133.8, 129.5, 127.9, 127.0, 126.9, 122.2, 106.1, 64.5, 52.6, 39.2, 29.0, 28.2, 21.3, 15.2, 14.4; MS (MALDI) calcd. for  $\text{C}_{30}\text{H}_{30}\text{NO}_5\text{S}$   $[\text{M} + \text{H}]^+$  516.18, found 516.12; HRMS (ESI) calcd. for  $\text{C}_{30}\text{H}_{31}\text{NO}_5\text{S}$   $[\text{M} + \text{H}]^+$  516.1844, found 516.1858.

**14bb**: 20% yield; deep-blue solid; m.p. 175–176 °C; IR (film)  $\nu_{\text{max}}$  2964, 2931, 1645, 1549, 1321, 1157, 663  $\text{cm}^{-1}$ ;  $^1\text{H}$  NMR (500 MHz,  $\text{CDCl}_3$ ) d 7.71 (d,  $J = 8.3$  Hz, 2H), 7.37 (d,  $J = 7.8$  Hz, 2H), 7.25–7.22 (m, 4H), 6.65 (d,  $J = 1.0$  Hz, 2H), 5.61 (d,  $J = 1.6$  Hz, 1H), 5.13 (s, 1H), 4.66 (d,  $J = 14.4$  Hz, 1H), 3.93 (qd,  $J = 7.0, 2.6$  Hz, 1H), 3.76 (qd,  $J = 7.0, 2.6$  Hz, 1H), 3.35–3.29 (m, 1H), 3.20 (dd,  $J = 14.4, 4.0$  Hz, 1H), 2.65 (q,  $J = 7.6$  Hz, 2H), 2.62–2.58 (m, 1H), 2.40 (s, 3H), 2.08 (dt,  $J = 13.0, 3.0$  Hz, 1H), 1.96 (td,  $J = 13.0, 4.8$  Hz, 1H), 1.34 (t,  $J = 7.0$  Hz, 3H), 1.25 (t,  $J = 7.6$  Hz, 3H);  $^{13}\text{C}$  NMR (125 MHz,  $\text{CDCl}_3$ ) d 186.2, 185.2, 164.2, 143.3, 143.0, 138.3, 138.0, 137.2, 135.2, 133.9, 130.1, 129.4, 128.4, 127.2, 127.1, 89.6, 65.0, 54.7, 37.0, 36.9, 28.4, 27.3, 26.3, 21.5, 15.5, 14.0; MS (MALDI) calcd. for  $\text{C}_{30}\text{H}_{32}\text{NO}_5\text{S}$   $[\text{M} + \text{H}]^+$  518.20, found 518.17.



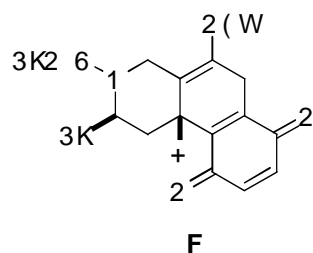

**14c**: 40% yield; deep-blue solid; m.p. 159–160 °C; IR (film)  $\nu_{\max}$  3062, 2980, 1655, 1550, 1302, 1159, 691  $\text{cm}^{-1}$ ;  $^1\text{H}$  NMR (500 MHz,  $\text{CDCl}_3$ )  $\delta$  7.94 (d,  $J = 7.3$  Hz, 2H), 7.75 (d,  $J = 8.0$  Hz, 2H), 7.52 (t,  $J = 7.2$  Hz, 1H), 7.46–7.43 (m, 3H), 7.31 (t,  $J = 7.2$  Hz, 1H), 6.71 (d,  $J = 10.1$  Hz, 1H), 6.68 (d,  $J = 10.1$  Hz, 1H), 5.31 (s, 1H), 5.16 (d,  $J = 15.1$  Hz, 1H), 3.86 (qd,  $J = 7.0, 2.3$  Hz, 1H), 3.77 (qd,  $J = 7.0, 2.3$  Hz, 1H), 3.16 (ddd,  $J = 23.4, 6.5, 2.3$  Hz, 1H), 2.87 (dd,  $J = 23.4, 7.4$  Hz, 2H), 2.77 (dt,  $J = 13.2, 2.3$  Hz, 1H), 1.30 (t,  $J = 7.0$  Hz, 3H), 1.18 (td,  $J = 12.8, 4.9$  Hz, 1H);  $^{13}\text{C}$  NMR (125 MHz,  $\text{CDCl}_3$ )  $\delta$  186.4, 186.1, 142.3, 141.0, 140.6, 138.4, 137.2, 136.7, 135.9, 132.3, 128.8, 128.6, 127.24, 127.20, 127.1, 109.8, 64.0, 55.5, 39.5, 33.0, 32.6, 23.7, 15.3; MS (MALDI) calcd. for  $\text{C}_{27}\text{H}_{26}\text{NO}_5\text{S}$   $[\text{M} + \text{H}]^+$  476.15, found 476.08.

The neat sample of **14c**, upon sitting at room temperature over an extended period of time (6 months), isomerized into compound **14c'**, with the enol ether double bond in conjugation with the benzoquinone motif (cf. compound **14bb**). This new compound **14c'** was crystallized from dichloromethane/pentane solution. Because **14c'** was obtained in a small quantity and was not readily separable from **14c**, its physical and spectroscopic data are not available at this point.

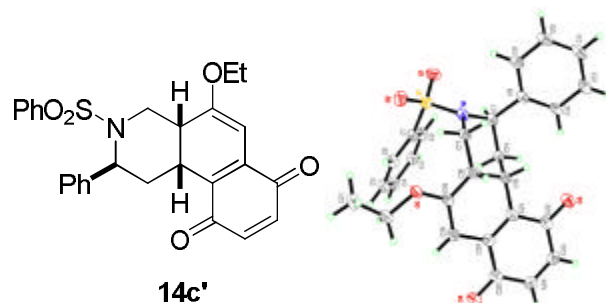

## General Procedure for the Synthesis of 15

A solution of the diene (**6**, 0.5 mmol) and imine (4.0 eq.) in toluene (2.0 mL) was stirred at 65 °C under Ar. After the reaction had reached completion (16–24 h, TLC), the mixture was concentrated and the crude residue purified through flash column chromatography (SiO<sub>2</sub>; 30–50% EtOAc in hexanes) to afford the product.

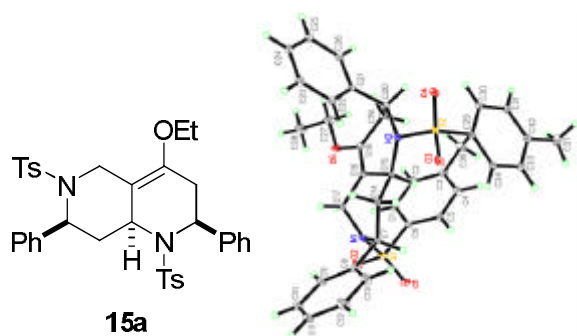

**15a**: 80% yield; white solid; m.p. 192–193 °C; IR (film)  $\nu_{\max}$  3055, 2978, 2931, 1697, 1342, 1157, 656  $\text{cm}^{-1}$ ; <sup>1</sup>H NMR (500 MHz, acetone-*d*<sub>6</sub>) d 7.62 (d, *J* = 8.3 Hz, 2H), 7.56 (d, *J* = 8.2 Hz, 2H), 7.44–7.35 (m, 6H), 7.25 (t, *J* = 7.7 Hz, 2H), 7.19–7.12 (m, 4H), 7.05–7.04 (m, 2H), 5.21 (d, *J* = 5.7 Hz, 1H), 4.83 (dd, *J* = 10.1, 7.5 Hz, 1H), 4.31 (d, *J* = 16.9 Hz, 1H), 4.05 (d, *J* = 16.9 Hz, 1H), 3.95 (d, *J* = 12.4 Hz, 1H), 3.80 (qd, *J* = 7.0, 3.0 Hz, 1H), 3.66 (qd, *J* = 7.0, 3.0 Hz, 1H), 2.65 (d, *J* = 16.7 Hz, 1H), 2.45 (s, 3H), 2.40 (s, 3H), 2.27 (ddd, *J* = 13.0, 7.4, 4.1 Hz, 1H), 1.82 (ddt, *J* = 16.7, 5.8, 2.9 Hz, 1H), 1.22 (td, *J* = 12.7, 10.3 Hz, 1H), 1.08 (t, *J* = 7.0 Hz, 3H); <sup>13</sup>C NMR (125 MHz, acetone-*d*<sub>6</sub>) d 143.6, 143.2, 143.1, 142.0, 140.5, 137.5, 136.9, 129.8, 129.6, 128.0, 127.9, 127.3, 127.1, 127.0, 126.8, 126.7, 126.2, 109.8, 62.8, 58.2, 52.9, 51.8, 42.2, 39.1, 25.3, 20.5, 20.4, 14.5; MS (MALDI) calcd. for C<sub>36</sub>H<sub>38</sub>N<sub>2</sub>O<sub>5</sub>S<sub>2</sub>Na [M + Na]<sup>+</sup> 665.21, found 665.28; HRMS (ESI) calcd. for C<sub>36</sub>H<sub>39</sub>N<sub>2</sub>O<sub>5</sub>S<sub>2</sub> [M + H]<sup>+</sup> 643.2300, found 643.2275.

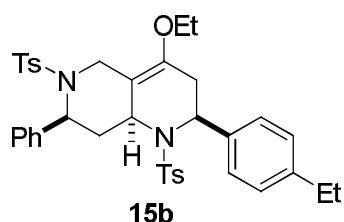

**15b**: 70% yield; white solid; m.p. 178–179 °C; IR (film)  $\nu_{\max}$  3027, 2968, 2925, 1701, 1346, 1161, 656  $\text{cm}^{-1}$ ; <sup>1</sup>H NMR (500 MHz, acetone-*d*<sub>6</sub>) d 7.61 (d, *J* = 8.3 Hz, 2H), 7.56 (d, *J* = 8.3 Hz, 2H), 7.42–7.38 (m, 4H), 7.26 (d, *J* = 8.0 Hz, 2H), 7.16–7.10 (m, 5H), 7.02–6.99 (m, 2H), 5.19 (d,

$J = 5.7$  Hz, 1H), 4.76 (dd,  $J = 9.9, 7.4$  Hz, 1H), 4.20 (d,  $J = 16.5$  Hz, 1H), 4.11 (d,  $J = 16.5$  Hz, 1H), 3.98 (d,  $J = 12.2$  Hz, 1H), 3.81 (qd,  $J = 7.0, 3.0$  Hz, 1H), 3.66 (qd,  $J = 7.0, 3.0$  Hz, 1H), 2.62 (d,  $J = 16.7$  Hz, 1H), 2.53 (q,  $J = 7.6$  Hz, 2H), 2.44 (s, 3H), 2.40 (s, 3H), 2.19 (ddd,  $J = 13.0, 7.3, 4.2$  Hz, 1H), 1.83 (ddt,  $J = 16.6, 6.0, 3.0$  Hz, 1H), 1.20 (td,  $J = 12.7, 10.2$  Hz, 1H), 1.11 (t,  $J = 7.6$  Hz, 3H), 1.08 (t,  $J = 7.0$  Hz, 3H);  $^{13}\text{C}$  NMR (125 MHz, acetone- $d_6$ )  $\delta$  143.5, 143.24, 143.22, 143.1, 141.9, 137.7, 137.6, 136.8, 129.8, 129.6, 127.9, 127.5, 127.4, 127.2, 126.9, 126.7, 126.4, 109.7, 62.9, 58.3, 52.7, 51.7, 42.5, 39.2, 27.9, 25.3, 20.5, 20.4, 15.1, 14.6; MS (MALDI) calcd. for  $\text{C}_{38}\text{H}_{42}\text{N}_2\text{O}_5\text{S}_2\text{Na}$   $[\text{M} + \text{Na}]^+$  693.24, found 693.20; HRMS (ESI) calcd. for  $\text{C}_{38}\text{H}_{46}\text{N}_3\text{O}_5\text{S}_2$   $[\text{M} + \text{H}]^+$  688.2879, found 688.2873.

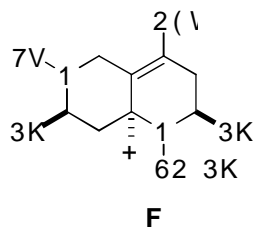

**15c**: 77% yield; white solid; m.p. 151–152 °C; IR (film)  $\nu_{\text{max}}$  3062, 3031, 2979, 1701, 1346, 1163, 664  $\text{cm}^{-1}$ ;  $^1\text{H}$  NMR (500 MHz, acetone- $d_6$ )  $\delta$  7.73–7.60 (m, 7H), 7.40–7.36 (m, 4H), 7.26 (t,  $J = 7.7$  Hz, 2H), 7.19–7.12 (m, 4H), 7.05–7.03 (m, 2H), 5.23 (d,  $J = 5.6$  Hz, 1H), 4.84 (dd,  $J = 10.1, 7.5$  Hz, 1H), 4.32 (d,  $J = 17.0$  Hz, 1H), 4.07 (d,  $J = 17.0$  Hz, 1H), 3.98 (d,  $J = 12.3$  Hz, 1H), 3.80 (qd,  $J = 7.0, 3.0$  Hz, 1H), 3.65 (qd,  $J = 7.0, 3.0$  Hz, 1H), 2.65 (d,  $J = 16.7$  Hz, 1H), 2.40 (s, 3H), 2.27 (ddd,  $J = 12.9, 7.4, 4.1$  Hz, 1H), 1.80 (ddt,  $J = 16.7, 6.0, 3.0$  Hz, 1H), 1.22 (td,  $J = 12.7, 10.3$  Hz, 1H), 1.07 (t,  $J = 7.0$  Hz, 3H);  $^{13}\text{C}$  NMR (125 MHz, acetone- $d_6$ )  $\delta$  143.2, 143.1, 142.0, 140.4, 140.3, 136.9, 132.8, 129.6, 129.4, 128.1, 128.0, 127.3, 127.1, 126.9, 126.7, 126.2, 109.8, 62.8, 58.1, 52.9, 51.8, 42.3, 39.1, 25.3, 20.6, 14.6; MS (MALDI) calcd. for  $\text{C}_{35}\text{H}_{36}\text{N}_2\text{O}_5\text{S}_2\text{Na}$   $[\text{M} + \text{Na}]^+$  651.20, found 651.14; HRMS (ESI) calcd. for  $\text{C}_{35}\text{H}_{37}\text{N}_2\text{O}_5\text{S}_2$   $[\text{M} + \text{H}]^+$  629.2144, found 629.2131.

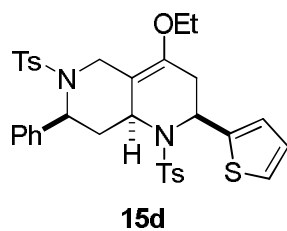

**15d**: 75% yield; white solid; m.p. 186–187 °C; IR (film)  $\nu_{\max}$  3063, 2978, 2918, 1699, 1346, 1161, 667  $\text{cm}^{-1}$ ;  $^1\text{H}$  NMR (500 MHz, acetone- $d_6$ )  $\delta$  7.70 (d,  $J = 8.2$  Hz, 2H), 7.64 (d,  $J = 8.2$  Hz, 2H), 7.49 (d,  $J = 8.0$  Hz, 2H), 7.44 (d,  $J = 7.9$  Hz, 2H), 7.31–7.21 (m, 6H), 6.96–6.90 (m, 2H), 5.46 (d,  $J = 5.7$  Hz, 1H), 4.95 (dd,  $J = 10.6, 7.2$  Hz, 1H), 4.54 (d,  $J = 17.3$  Hz, 1H), 4.13 (d,  $J = 17.3$  Hz, 1H), 3.94 (d,  $J = 11.8$  Hz, 1H), 3.86 (qd,  $J = 7.0, 3.0$  Hz, 1H), 3.74 (qd,  $J = 7.0, 3.0$  Hz, 1H), 2.65 (d,  $J = 16.6$  Hz, 1H), 2.51 (s, 3H), 2.46 (s, 3H), 2.49–2.45 (m, 1H), 2.02–1.97 (m, 1H), 1.62 (td,  $J = 12.7, 10.7$  Hz, 1H), 1.18 (t,  $J = 7.0$  Hz, 3H);  $^{13}\text{C}$  NMR (125 MHz, acetone- $d_6$ )  $\delta$  145.2, 143.7, 143.2, 143.0, 142.3, 137.2, 137.0, 129.8, 129.5, 128.1, 127.1, 126.9, 126.3, 126.0, 125.1, 125.2, 109.4, 62.9, 58.2, 51.6, 50.5, 42.2, 39.4, 28.1, 20.5, 20.4, 14.7; MS (MALDI) calcd. for  $\text{C}_{34}\text{H}_{36}\text{N}_2\text{O}_5\text{S}_3\text{Na}$   $[\text{M} + \text{Na}]^+$  671.17, found 671.13; HRMS (ESI) calcd. for  $\text{C}_{34}\text{H}_{40}\text{N}_3\text{O}_5\text{S}_3$   $[\text{M} + \text{NH}_4]^+$  666.2130, found 666.2122.

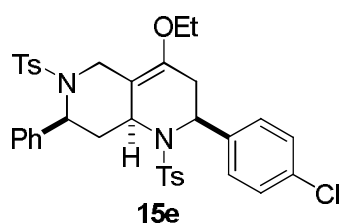

**15e**: 77% yield; white solid; m.p. 181–182 °C; IR (film)  $\nu_{\max}$  3060, 2978, 2913, 1700, 1346, 1162, 660  $\text{cm}^{-1}$ ;  $^1\text{H}$  NMR (500 MHz, acetone- $d_6$ )  $\delta$  7.62 (d,  $J = 8.2$  Hz, 2H), 7.57 (d,  $J = 8.2$  Hz, 2H), 7.44 (d,  $J = 8.0$  Hz, 2H), 7.40–7.35 (m, 4H), 7.30–7.28 (m, 2H), 7.21–7.14 (m, 3H), 7.08–7.06 (m, 2H), 5.20 (d,  $J = 5.4$  Hz, 1H), 4.84 (dd,  $J = 10.2, 7.3$  Hz, 1H), 4.32 (d,  $J = 16.9$  Hz, 1H), 4.08 (d,  $J = 16.9$  Hz, 1H), 3.93 (d,  $J = 12.0$  Hz, 1H), 3.80 (qd,  $J = 7.0, 3.0$  Hz, 1H), 3.65 (qd,  $J = 7.0, 3.0$  Hz, 1H), 2.64 (d,  $J = 16.7$  Hz, 1H), 2.45 (s, 3H), 2.40 (s, 3H), 2.32 (ddd,  $J = 12.9, 7.3, 4.1$  Hz, 1H), 1.81 (ddt,  $J = 16.7, 5.8, 2.9$  Hz, 1H), 1.25 (td,  $J = 12.7, 10.3$  Hz, 1H), 1.08 (t,  $J = 7.0$  Hz, 3H);  $^{13}\text{C}$  NMR (125 MHz, acetone- $d_6$ )  $\delta$  143.8, 143.2, 143.0, 142.0, 139.6, 137.3, 136.9, 132.4, 129.9, 129.6, 129.2, 128.1, 128.0, 127.1, 126.9, 126.8, 126.2, 109.9, 62.9, 58.1, 52.6, 51.8, 42.1, 39.3, 25.5, 20.5, 20.4, 14.5; MS (MALDI) calcd. for  $\text{C}_{36}\text{H}_{37}\text{ClN}_2\text{O}_5\text{S}_2\text{Na}$   $[\text{M} + \text{Na}]^+$  699.17, found 699.14; HRMS (ESI) calcd. for  $\text{C}_{36}\text{H}_{38}\text{ClN}_2\text{O}_5\text{S}_2$   $[\text{M} + \text{H}]^+$  677.1910, found 677.1895.

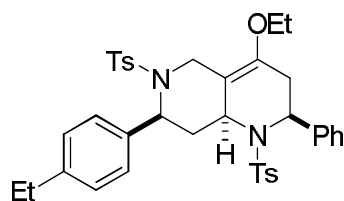

**15f**

**15f:** 69% yield; white solid; m.p. 149–150 °C; IR (film)  $\nu_{\max}$  3029, 2967, 2930, 1701, 1345, 1162, 655  $\text{cm}^{-1}$ ;  $^1\text{H}$  NMR (500 MHz, acetone- $d_6$ )  $\delta$  7.60–7.56 (m, 4H), 7.42 (d,  $J = 7.9$  Hz, 2H), 7.38–7.35 (m, 4H), 7.26 (t,  $J = 7.7$  Hz, 2H), 7.17 (t,  $J = 7.3$  Hz, 1H), 6.99 (d,  $J = 8.2$  Hz, 2H), 6.92 (d,  $J = 8.2$  Hz, 2H), 5.22 (d,  $J = 5.7$  Hz, 1H), 4.81 (dd,  $J = 10.1, 7.4$  Hz, 1H), 4.31 (d,  $J = 17.0$  Hz, 1H), 4.06 (d,  $J = 17.0$  Hz, 1H), 3.98 (d,  $J = 12.2$  Hz, 1H), 3.80 (qd,  $J = 7.0, 3.0$  Hz, 1H), 3.66 (qd,  $J = 7.0, 3.0$  Hz, 1H), 2.64 (d,  $J = 16.7$  Hz, 1H), 2.53 (q,  $J = 7.6$  Hz, 2H), 2.44 (s, 3H), 2.39 (s, 3H), 2.24 (ddd,  $J = 13.0, 7.4, 4.1$  Hz, 1H), 1.81 (ddt,  $J = 16.6, 5.9, 3.0$  Hz, 1H), 1.23 (td,  $J = 12.7, 10.3$  Hz, 1H), 1.14 (t,  $J = 7.6$  Hz, 3H), 1.08 (t,  $J = 7.0$  Hz, 3H);  $^{13}\text{C}$  NMR (125 MHz, acetone- $d_6$ )  $\delta$  143.6, 143.1, 143.0, 142.8, 140.5, 139.1, 137.6, 137.2, 129.8, 129.5, 128.0, 127.4, 127.1, 127.0, 126.8, 126.4, 110.0, 62.8, 58.0, 52.9, 51.8, 42.2, 39.0, 28.0, 25.3, 20.6, 20.5, 15.0, 14.5; MS (MALDI) calcd. for  $\text{C}_{38}\text{H}_{42}\text{N}_2\text{O}_5\text{S}_2\text{Na}$   $[\text{M} + \text{Na}]^+$  693.24, found 693.30; HRMS (ESI) calcd. for  $\text{C}_{38}\text{H}_{46}\text{N}_3\text{O}_5\text{S}_2$   $[\text{M} + \text{NH}_4]^+$  688.2879, found 688.2827.

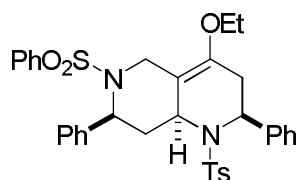

**15g**

**15g:** 78% yield; white solid; m.p. 176–177 °C; IR (film)  $\nu_{\max}$  3062, 2978, 1700, 1346, 1164, 698  $\text{cm}^{-1}$ ;  $^1\text{H}$  NMR (500 MHz, acetone- $d_6$ )  $\delta$  7.81–7.75 (m, 3H), 7.65 (t,  $J = 7.6$  Hz, 2H), 7.58 (t,  $J = 8.2$  Hz, 2H), 7.49 (d,  $J = 8.2$  Hz, 2H), 7.42 (d,  $J = 7.6$  Hz, 2H), 7.31 (t,  $J = 7.6$  Hz, 2H), 7.25–7.18 (m, 4H), 7.13 (d,  $J = 6.7$  Hz, 2H), 5.26 (d,  $J = 5.5$  Hz, 1H), 4.90 (dd,  $J = 10.3, 7.3$  Hz, 1H), 4.47 (d,  $J = 17.2$  Hz, 1H), 4.11 (d,  $J = 17.2$  Hz, 1H), 3.94 (d,  $J = 12.0$  Hz, 1H), 3.87 (qd,  $J = 7.0, 3.0$  Hz, 1H), 3.74 (qd,  $J = 7.0, 3.0$  Hz, 1H), 2.72 (d,  $J = 16.7$  Hz, 1H), 2.51 (s, 3H), 2.36 (ddd,  $J = 12.9, 7.2, 3.9$  Hz, 1H), 1.88–1.84 (m, 1H), 1.30 (td,  $J = 12.7, 10.5$  Hz, 1H), 1.15 (t,  $J = 7.0$  Hz, 3H);  $^{13}\text{C}$  NMR (125 MHz, acetone- $d_6$ )  $\delta$  143.6, 143.3, 142.0, 140.5, 139.8, 137.4, 132.6, 129.9, 129.0, 128.0, 127.9, 127.2, 127.05, 126.99, 126.89, 126.80, 126.1, 109.7, 62.9, 58.3, 53.0, 51.8,

42.2, 39.3, 25.5, 20.4, 14.6; MS (MALDI) calcd. for  $C_{35}H_{36}N_2O_5S_2Na$   $[M + Na]^+$  651.20, found 651.15; HRMS (ESI) calcd. for  $C_{35}H_{40}N_3O_5S_2$   $[M + NH_4]^+$  646.2410, found 646.2392.

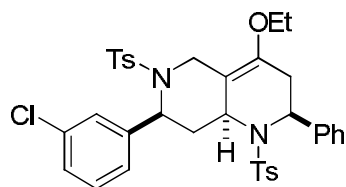

**15h**

**15h:** 78% yield; white solid; m.p. 168–169 °C; IR (film)  $\nu_{max}$  3062, 2978, 2917, 1701, 1346, 1162, 665  $cm^{-1}$ ;  $^1H$  NMR (500 MHz, acetone- $d_6$ )  $\delta$  7.61 (d,  $J = 8.2$  Hz, 2H), 7.58 (d,  $J = 8.3$  Hz, 2H), 7.44–7.35 (m, 6H), 7.26 (t,  $J = 7.6$  Hz, 2H), 7.22–7.16 (m, 3H), 7.02–7.01 (m, 2H), 5.23 (d,  $J = 5.7$  Hz, 1H), 4.77 (dd,  $J = 10.4, 7.1$  Hz, 1H), 4.40 (d,  $J = 16.7$  Hz, 1H), 4.16 (d,  $J = 16.7$  Hz, 1H), 3.95 (d,  $J = 12.2$  Hz, 1H), 3.81 (qd,  $J = 7.0, 3.0$  Hz, 1H), 3.67 (qd,  $J = 7.0, 3.0$  Hz, 1H), 2.65 (d,  $J = 16.7$  Hz, 1H), 2.45 (s, 3H), 2.41 (s, 3H), 2.23 (ddd,  $J = 12.9, 7.0, 4.0$  Hz, 1H), 1.84 (ddt,  $J = 16.7, 5.9, 2.9$  Hz, 1H), 1.16 (td,  $J = 12.7, 10.5$  Hz, 1H), 1.08 (t,  $J = 7.0$  Hz, 3H);  $^{13}C$  NMR (125 MHz, acetone- $d_6$ )  $\delta$  144.4, 143.7, 143.5, 143.4, 140.5, 137.5, 136.5, 133.3, 129.8, 129.7, 129.6, 128.0, 127.3, 127.2, 127.1, 126.9, 126.8, 126.4, 124.9, 109.5, 62.9, 58.0, 53.0, 51.8, 42.4, 39.2, 25.4, 20.5, 20.4, 14.5; MS (MALDI) calcd. for  $C_{36}H_{37}ClN_2O_5S_2Na$   $[M + Na]^+$  699.17, found 699.11; HRMS (ESI) calcd. for  $C_{36}H_{41}ClN_3O_5S_2$   $[M + NH_4]^+$  694.2176, found 694.2164.

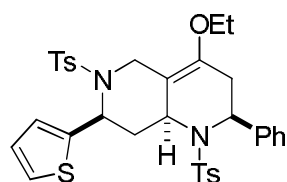

**15i**

**15i:** 70% yield; white solid; m.p. 183–184 °C; IR (film)  $\nu_{max}$  3063, 2978, 1701, 1344, 1162, 655  $cm^{-1}$ ;  $^1H$  NMR (500 MHz, acetone- $d_6$ )  $\delta$  7.68 (d,  $J = 8.3$  Hz, 2H), 7.53 (d,  $J = 8.3$  Hz, 2H), 7.43–7.36 (m, 6H), 7.29 (t,  $J = 7.6$  Hz, 2H), 7.23–7.20 (m, 2H), 6.80 (dd,  $J = 5.1, 3.5$  Hz, 1H), 6.58 (d,  $J = 3.5$  Hz, 1H), 5.34 (t,  $J = 8.7$  Hz, 1H), 5.22 (d,  $J = 5.8$  Hz, 1H), 4.34 (d,  $J = 17.7$  Hz, 1H), 4.00 (d,  $J = 12.2$  Hz, 1H), 3.84 (d,  $J = 17.7$  Hz, 1H), 3.79 (qd,  $J = 7.0, 3.0$  Hz, 1H), 3.64 (qd,  $J = 7.0, 3.0$  Hz, 1H), 2.65 (d,  $J = 16.8$  Hz, 1H), 2.44 (s, 3H), 2.39 (s, 3H), 2.42–2.36 (m, 1H), 1.82 (ddt,  $J = 16.7, 6.1, 3.1$  Hz, 1H), 1.32 (td,  $J = 12.7, 8.8$  Hz, 1H), 1.05 (t,  $J = 7.0$  Hz, 3H);  $^{13}C$  NMR (125 MHz, acetone- $d_6$ )  $\delta$  145.4, 143.6, 143.3, 143.0, 140.4, 137.6, 137.4, 129.8, 129.7, 128.1, 127.4,

127.2, 127.0, 126.7, 126.2, 124.8, 124.7, 109.4, 62.7, 52.7, 52.6, 50.9, 41.1, 38.2, 25.0, 20.5, 20.4, 14.4; MS (MALDI) calcd. for C<sub>34</sub>H<sub>36</sub>N<sub>2</sub>O<sub>5</sub>S<sub>3</sub>Na [M + Na]<sup>+</sup> 671.17, found 671.08.

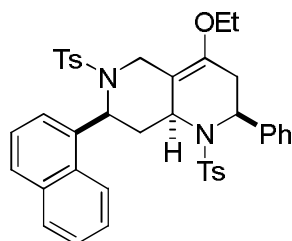

**15j**

**15j**: 65% yield; white solid; m.p. 195–196 °C; IR (film)  $\nu_{\max}$  3029, 2979, 1699, 1341, 1162, 656  $\text{cm}^{-1}$ ; <sup>1</sup>H NMR (400 MHz, CDCl<sub>3</sub>) d 7.82–7.79 (m, 1H), 7.71–7.66 (m, 3H), 7.61 (d, *J* = 8.2 Hz, 1H), 7.38–7.36 (m, 4H), 7.32 (d, *J* = 7.9 Hz, 2H), 7.27–7.20 (m, 5H), 7.12 (t, *J* = 7.3 Hz, 2H), 6.93 (d, *J* = 7.9 Hz, 1H), 5.31–5.24 (m, 2H), 4.63 (d, *J* = 16.2 Hz, 1H), 4.35 (d, *J* = 12.3 Hz, 1H), 4.22 (d, *J* = 16.2 Hz, 1H), 3.89 (qd, *J* = 7.0, 2.8 Hz, 1H), 3.75 (qd, *J* = 7.0, 2.8 Hz, 1H), 2.62 (d, *J* = 16.5 Hz, 1H), 2.46 (s, 3H), 2.36 (ddd, *J* = 13.0, 5.4, 4.0 Hz, 1H), 2.26 (s, 3H), 2.04 (ddt, *J* = 16.6, 6.1, 2.7 Hz, 1H), 1.59–1.50 (m, 1H), 1.24 (t, *J* = 7.0 Hz, 3H); <sup>13</sup>C NMR (100 MHz, CDCl<sub>3</sub>) d 143.6, 143.1, 142.6, 139.7, 137.5, 136.4, 136.0, 133.5, 130.5, 130.0, 128.8, 128.5, 128.4, 128.1, 127.6, 127.5, 127.2, 127.0, 126.1, 125.2, 125.0, 124.6, 123.2, 111.6, 63.8, 57.4, 53.2, 53.0, 44.3, 38.9, 25.9, 21.6, 21.4, 15.3; MS (MALDI) calcd. for C<sub>40</sub>H<sub>40</sub>N<sub>2</sub>O<sub>5</sub>S<sub>2</sub>Na [M + Na]<sup>+</sup> 715.23, found 715.22; HRMS (ESI) calcd. for C<sub>40</sub>H<sub>44</sub>N<sub>3</sub>O<sub>5</sub>S<sub>2</sub> [M + NH<sub>4</sub>]<sup>+</sup> 710.2723, found 710.2686.

### General Procedure for the Synthesis of 16–18

Concentrated HCl (12.1 M, 0.10 mL) was added dropwise to a solution of the enol ether (**7**, **11**, or **15**, 0.17 mmol) in acetone (13 mL). The mixture was stirred overnight at room temperature. The resulting mixture was concentrated and dissolved in DCM (15 mL). The solution was washed with saturated NaHCO<sub>3</sub> (2 × 10 mL) and brine (2 × 10 mL) and then dried (NaSO<sub>4</sub>). The organic phase was concentrated and the crude residue purified through flash column chromatography (SiO<sub>2</sub>; 30–50% EtOAc in hexanes) to afford the product.

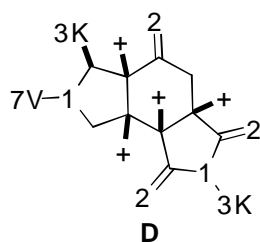

**16a:** 92% yield; white solid; m.p. 118–119 °C; IR (film)  $\nu_{\max}$  3065, 2919, 2871, 1715, 1382, 1165, 670  $\text{cm}^{-1}$ ;  $^1\text{H}$  NMR (400 MHz,  $\text{CDCl}_3$ )  $\delta$  7.59–7.51 (m, 4H), 7.48–7.44 (m, 1H), 7.36–7.25 (m, 9H), 5.37 (s 1H), 3.98 (dd,  $J = 9.4, 8.6$  Hz, 1H), 3.47–3.39 (m, 1H), 3.33–3.28 (m, 2H), 2.96 (dd,  $J = 11.1, 10.0$  Hz, 1H), 2.64–2.58 (m, 2H), 2.44 (s, 3H), 1.94–1.84 (m, 1H);  $^{13}\text{C}$  NMR (100 MHz,  $\text{CDCl}_3$ )  $\delta$  205.0, 176.2, 175.1, 144.3, 140.9, 133.7, 131.1, 129.8, 129.5, 129.2, 128.7, 127.8, 127.4, 126.2, 125.7, 66.2, 57.5, 48.9, 37.6, 37.5, 35.8, 35.6, 21.6; MS (MALDI) calcd. for  $\text{C}_{29}\text{H}_{26}\text{N}_2\text{O}_5\text{SNa}$   $[\text{M} + \text{Na}]^+$  537.14, found 537.16; HRMS (ESI) calcd. for  $\text{C}_{29}\text{H}_{27}\text{N}_2\text{O}_5\text{S}$   $[\text{M} + \text{H}]^+$  515.1640, found 515.1639.

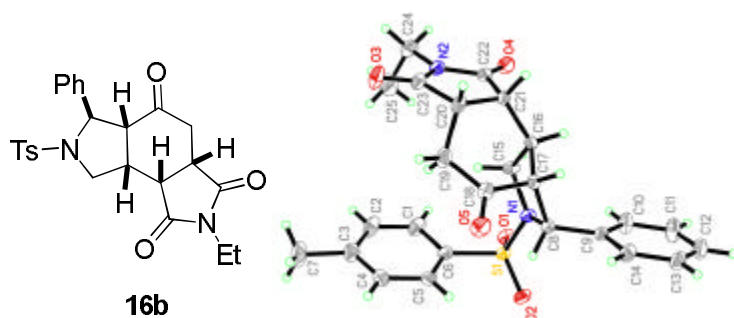

**16b:** 90% yield; white solid; decomposed at 200 °C; IR (film)  $\nu_{\max}$  3062, 2979, 2939, 1702, 1348, 1161, 671  $\text{cm}^{-1}$ ;  $^1\text{H}$  NMR (400 MHz,  $\text{CDCl}_3$ )  $\delta$  7.54 (d,  $J = 8.2$  Hz, 2H), 7.31–7.23 (m, 7H), 5.29 (s 1H), 3.86 (t,  $J = 9.1$  Hz, 1H), 3.59 (q,  $J = 7.2$  Hz, 2H), 3.35–3.29 (m, 1H), 3.13–3.06 (m, 2H), 2.75 (t,  $J = 10.6$  Hz, 1H), 2.57–2.49 (m, 2H), 2.44 (s, 3H), 1.71–1.64 (m, 1H), 1.20 (t,  $J = 7.2$  Hz, 3H);  $^{13}\text{C}$  NMR (100 MHz,  $\text{CDCl}_3$ )  $\delta$  205.4, 177.0, 175.8, 144.3, 140.9, 133.7, 129.8, 128.7, 127.7, 127.4, 125.7, 66.3, 57.3, 48.9, 37.3, 37.2, 35.6, 35.4, 34.2, 21.6, 13.0; MS (MALDI) calcd. for  $\text{C}_{25}\text{H}_{26}\text{N}_2\text{O}_5\text{SNa}$   $[\text{M} + \text{Na}]^+$  489.14, found 489.16; HRMS (ESI) calcd. for  $\text{C}_{25}\text{H}_{30}\text{N}_3\text{O}_5\text{SNa}$   $[\text{M} + \text{NH}_4]^+$  484.1906, found 484.1904.



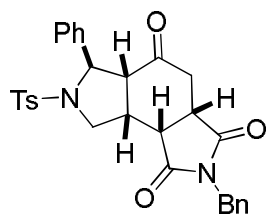

**16c**

**16c:** 89% yield; white solid; m.p. 129–130 °C; IR (film)  $\nu_{\max}$  3030, 2921, 2870, 1706, 1348, 1164, 670  $\text{cm}^{-1}$ ;  $^1\text{H}$  NMR (400 MHz,  $\text{CDCl}_3$ )  $\delta$  7.46–7.40 (m, 5H), 7.34–7.25 (m, 7H), 7.18 (d,  $J = 8.0$  Hz, 2H), 5.20 (s, 1H), 4.73 (AB d,  $J = 13.8$  Hz, 1H), 4.61 (AB d,  $J = 13.8$  Hz, 1H), 3.66 (dd,  $J = 9.9, 8.7$  Hz, 1H), 3.34–3.25 (m, 1H), 3.11–3.06 (m, 2H), 2.52 (d,  $J = 6.7$  Hz, 1H), 2.48–2.37 (m, 5H), 1.39–1.30 (m, 1H);  $^{13}\text{C}$  NMR (100 MHz,  $\text{CDCl}_3$ )  $\delta$  205.5, 176.8, 175.7, 144.2, 141.0, 135.5, 133.2, 129.7, 129.1, 129.0, 128.69, 128.67, 127.7, 127.3, 125.6, 66.5, 57.3, 48.7, 42.8, 37.2, 37.1, 35.7, 35.2, 21.6; MS (MALDI) calcd. for  $\text{C}_{30}\text{H}_{28}\text{N}_2\text{O}_5\text{SNa}$   $[\text{M} + \text{Na}]^+$  551.16, found 551.09; HRMS (ESI) calcd. for  $\text{C}_{30}\text{H}_{29}\text{N}_2\text{O}_5\text{S}$   $[\text{M} + \text{H}]^+$  529.1797, found 529.1797.

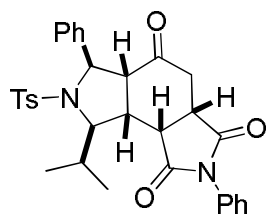

**16d**

**16d:** 91% yield; white solid; decomposed at 265 °C; IR (film)  $\nu_{\max}$  3035, 2959, 2914, 1717, 1389, 1150, 671  $\text{cm}^{-1}$ ;  $^1\text{H}$  NMR (500 MHz,  $\text{CDCl}_3$ )  $\delta$  7.46–7.37 (m, 3H), 7.21–7.06 (m, 9H), 6.90 (d,  $J = 8.0$  Hz, 2H), 5.11 (s, 1H), 4.67 (d,  $J = 8.6$  Hz, 1H), 3.60 (t,  $J = 8.3$  Hz, 1H), 3.21–3.18 (m, 3H), 2.91 (dd,  $J = 12.1, 9.9$  Hz, 1H), 2.68–2.65 (m, 1H), 2.54 (d,  $J = 12.6$  Hz, 1H), 2.56 (s, 3H), 1.07 (d,  $J = 6.3$  Hz, 3H), 1.06 (d,  $J = 6.3$  Hz, 3H);  $^{13}\text{C}$  NMR (125 MHz,  $\text{CDCl}_3$ )  $\delta$  205.9, 176.2, 175.1, 142.2, 139.0, 137.7, 131.3, 129.1, 128.8, 128.55, 128.52, 127.9, 127.6, 127.2, 126.4, 67.5, 65.2, 59.8, 41.4, 41.1, 39.6, 38.2, 31.8, 21.2, 19.7, 15.0; MS (MALDI) calcd. for  $\text{C}_{32}\text{H}_{32}\text{N}_2\text{O}_5\text{SNa}$   $[\text{M} + \text{Na}]^+$  579.19, found 579.10; HRMS (MALDI) calcd. for  $\text{C}_{32}\text{H}_{36}\text{N}_3\text{O}_5\text{S}$   $[\text{M} + \text{NH}_4]^+$  574.2376, found 574.2372.

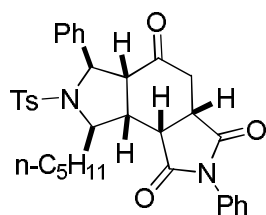

**16e**

**16e:** 75% yield; white solid; m.p. 105–106 °C; IR (film)  $\nu_{\max}$  3030, 2924, 2853, 1716, 1388, 1155, 677  $\text{cm}^{-1}$ ;  $^1\text{H}$  NMR (400 MHz,  $\text{CDCl}_3$ )  $\delta$  7.51–7.47 (m, 2H), 7.44–7.38 (m, 3H), 7.32–7.20 (m, 7H), 7.14 (d,  $J = 8.0$  Hz, 2H), 5.01 (d,  $J = 4.9$  Hz, 1H), 4.22 (td,  $J = 6.5, 3.2$  Hz, 1H), 3.43 (td,  $J = 9.4, 6.4$  Hz, 1H), 3.28 (dd,  $J = 9.5, 5.9$  Hz, 1H), 3.16–3.11 (m, 1H), 3.04 (dd,  $J = 7.9, 5.0$  Hz, 1H), 2.63 (dd,  $J = 15.4, 9.4$  Hz, 1H), 2.37 (s, 3H), 2.01–1.92 (m, 2H), 1.83–1.75 (m, 1H), 1.42–1.38 (m, 2H), 1.29–1.26 (m, 4H), 0.87 (t,  $J = 6.9$  Hz, 3H);  $^{13}\text{C}$  NMR (100 MHz,  $\text{CDCl}_3$ )  $\delta$  206.7, 176.4, 174.6, 143.6, 140.0, 135.7, 131.4, 129.4, 129.3, 129.0, 128.3, 127.6, 127.5, 127.2, 126.2, 66.0, 62.6, 58.0, 42.1, 39.4, 38.9, 36.7, 35.7, 31.8, 24.9, 22.6, 21.5, 14.0; MS (MALDI) calcd. for  $\text{C}_{34}\text{H}_{36}\text{N}_2\text{O}_5\text{SNa}$   $[\text{M} + \text{Na}]^+$  607.22, found 607.21; HRMS (ESI) calcd. for  $\text{C}_{34}\text{H}_{40}\text{N}_3\text{O}_5\text{S}$   $[\text{M} + \text{NH}_4]^+$  602.2689, found 602.2664.

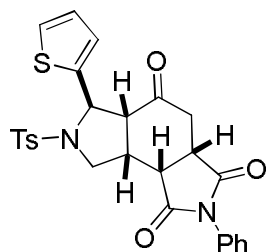

**16f**

**16f:** 90% yield; white solid; m.p. 108–109 °C; IR (film)  $\nu_{\max}$  3063, 2914, 2845, 1711, 1385, 1163, 671  $\text{cm}^{-1}$ ;  $^1\text{H}$  NMR (500 MHz,  $\text{CDCl}_3$ )  $\delta$  7.58–7.49 (m, 5H), 7.31–7.19 (m, 5H), 7.04 (d,  $J = 2.8$  Hz, 1H), 6.93 (t,  $J = 4.2$  Hz, 1H), 5.65 (s, 1H), 3.90 (t,  $J = 9.0$  Hz, 1H), 3.70–3.64 (m, 1H), 3.48–3.38 (m, 2H), 2.98 (t,  $J = 10.4$  Hz, 1H), 2.82 (d,  $J = 6.5$  Hz, 1H), 2.74–2.67 (m, 1H), 2.46 (s, 3H), 2.10 (dd,  $J = 17.1, 9.6$  Hz, 1H);  $^{13}\text{C}$  NMR (125 MHz,  $\text{CDCl}_3$ )  $\delta$  204.3, 176.0, 175.0, 144.5, 144.2, 133.7, 131.0, 129.6, 129.3, 129.0, 127.3, 127.0, 126.1, 125.1, 125.0, 62.2, 57.2, 48.2, 37.6, 37.5, 36.5, 35.6, 21.4; MS (MALDI) calcd. for  $\text{C}_{27}\text{H}_{24}\text{N}_2\text{O}_5\text{S}_2\text{Na}$   $[\text{M} + \text{Na}]^+$  543.10, found 543.00; HRMS (ESI) calcd. for  $\text{C}_{27}\text{H}_{25}\text{N}_2\text{O}_5\text{S}_2$   $[\text{M} + \text{H}]^+$  521.1205, found 521.1199.

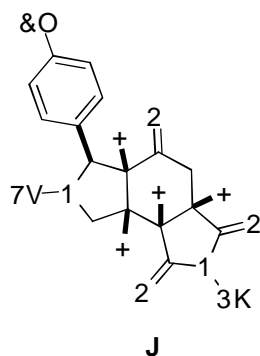

**16g:** 85% yield; white solid; m.p. 158–159 °C; IR (film)  $\nu_{\max}$  3061, 2911, 2845, 1715, 1385, 1165, 670  $\text{cm}^{-1}$ ;  $^1\text{H}$  NMR (500 MHz,  $\text{CDCl}_3$ )  $\delta$  7.60–7.46 (m, 5H), 7.34–7.28 (m, 8H), 5.33 (s, 1H), 3.98 (t,  $J = 8.7$  Hz, 1H), 3.42–3.32 (m, 3H), 2.94 (t,  $J = 10.4$  Hz, 1H), 2.66–2.61 (m, 2H), 2.48 (s, 3H), 1.97–1.92 (m, 1H);  $^{13}\text{C}$  NMR (125 MHz,  $\text{CDCl}_3$ )  $\delta$  204.5, 176.0, 174.9, 144.4, 139.4, 133.5, 133.3, 131.0, 129.7, 129.3, 129.0, 128.7, 127.3, 127.1, 126.0, 65.1, 57.2, 48.9, 37.5, 37.2, 35.7, 35.3, 21.5; MS (MALDI) calcd. for  $\text{C}_{29}\text{H}_{25}\text{ClN}_2\text{O}_5\text{SNa}$   $[\text{M} + \text{Na}]^+$  571.11, found 571.07; HRMS (ESI) calcd. for  $\text{C}_{29}\text{H}_{26}\text{ClN}_2\text{O}_5\text{S}$   $[\text{M} + \text{H}]^+$  549.1251, found 549.1240.

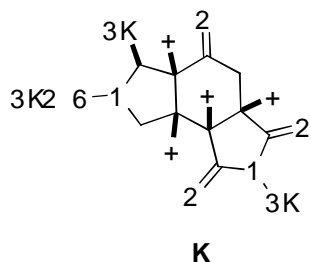

**16h:** 90% yield; white solid; m.p. 209–210 °C; IR (film)  $\nu_{\max}$  3061, 2914, 2846, 1713, 1385, 1165, 695  $\text{cm}^{-1}$ ;  $^1\text{H}$  NMR (500 MHz,  $\text{CDCl}_3$ )  $\delta$  7.67 (d,  $J = 7.5$  Hz, 2H), 7.60 (t,  $J = 7.4$  Hz, 1H), 7.52–7.42 (m, 5H), 7.32–7.23 (m, 7H), 5.36 (s, 1H), 3.96 (t,  $J = 9.0$  Hz, 1H), 3.39–3.34 (m, 1H), 3.30–3.24 (m, 2H), 2.92 (t,  $J = 10.6$  Hz, 1H), 2.60–2.54 (m, 2H), 1.92–1.85 (m, 1H);  $^{13}\text{C}$  NMR (125 MHz,  $\text{CDCl}_3$ )  $\delta$  204.7, 176.1, 175.0, 140.6, 136.4, 133.3, 131.1, 129.3, 129.1, 129.0, 128.6, 127.7, 127.2, 126.1, 125.6, 65.8, 57.3, 48.8, 37.5, 37.3, 35.6, 35.4; MS (MALDI) calcd. for  $\text{C}_{28}\text{H}_{24}\text{N}_2\text{O}_5\text{SNa}$   $[\text{M} + \text{Na}]^+$  523.13, found 523.10; HRMS (ESI) calcd. for  $\text{C}_{28}\text{H}_{25}\text{N}_2\text{O}_5\text{S}$   $[\text{M} + \text{H}]^+$  501.1484, found 501.1485.

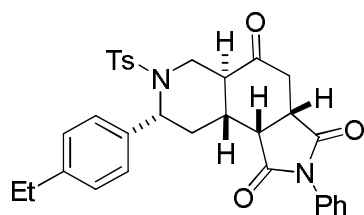

**17a**

**17a:** 87% yield; white solid; m.p. 116–117 °C; IR (film)  $\nu_{\max}$  3059, 2964, 2927, 1712, 1383, 1155, 657  $\text{cm}^{-1}$ ;  $^1\text{H}$  NMR (500 MHz,  $\text{CDCl}_3$ ) d 7.54 (d,  $J = 8.2$  Hz, 2H), 7.44 (t,  $J = 7.2$  Hz, 2H), 7.38 (t,  $J = 7.2$  Hz, 1H), 7.23–7.21 (m, 4H), 7.14 (d,  $J = 8.0$  Hz, 2H), 7.08 (d,  $J = 8.0$  Hz, 2H), 5.05 (dd,  $J = 10.4, 7.5$  Hz, 1H), 3.96 (dd,  $J = 15.0, 2.8$  Hz, 1H), 3.49 (t,  $J = 8.0$  Hz, 1H), 3.42 (dd,  $J = 9.6, 6.1$  Hz, 1H), 3.35 (dd,  $J = 15.0, 8.0$  Hz, 1H), 3.10 (dd,  $J = 17.6, 1.1$  Hz, 1H), 2.71 (dd,  $J = 17.6, 7.5$  Hz, 1H), 2.64–2.58 (m, 3H), 2.40 (s, 3H), 2.40–2.32 (m, 1H), 2.04–1.97 (m, 1H), 1.92–1.87 (m, 1H), 1.21 (t,  $J = 7.6$  Hz, 3H);  $^{13}\text{C}$  NMR (125 MHz,  $\text{CDCl}_3$ ) d 205.1, 176.8, 175.3, 143.5, 143.4, 137.7, 135.9, 131.2, 129.4, 129.1, 128.8, 127.83, 127.79, 126.2, 126.1, 57.6, 47.6, 41.6, 39.6, 37.4, 36.0, 33.4, 32.9, 28.3, 21.5, 15.5; MS (MALDI) calcd. for  $\text{C}_{32}\text{H}_{32}\text{N}_2\text{O}_5\text{SNa}$   $[\text{M} + \text{Na}]^+$  579.19, found 579.23; HRMS (ESI) calcd. for  $\text{C}_{32}\text{H}_{33}\text{N}_2\text{O}_5\text{S}$   $[\text{M} + \text{H}]^+$  557.2110, found 557.2088.

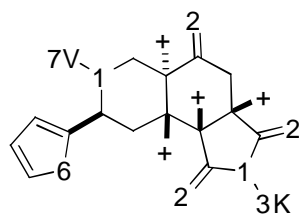

**E**

**17b:** 80% yield; white solid; m.p. 222–223 °C; IR (film)  $\nu_{\max}$  3062, 2919, 2866, 1712, 1385, 1159, 664  $\text{cm}^{-1}$ ;  $^1\text{H}$  NMR (500 MHz,  $\text{CDCl}_3$ ) d 7.70 (d,  $J = 8.2$  Hz, 2H), 7.50 (t,  $J = 7.6$  Hz, 2H), 7.43 (t,  $J = 7.6$  Hz, 1H), 7.24–7.18 (m, 5H), 6.96–6.93 (m, 1H), 6.87–6.86 (m, 1H), 5.64 (s, 1H), 4.22 (dd,  $J = 15.0, 5.1$  Hz, 1H), 3.46–3.42 (m, 1H), 3.26 (dd,  $J = 9.6, 6.1$  Hz, 1H), 3.01–2.95 (m, 2H), 2.60 (dd,  $J = 17.5, 7.9$  Hz, 1H), 2.52–2.45 (m, 1H), 2.42–2.34 (m, 2H), 2.25 (s, 3H), 1.96–1.91 (m, 1H);  $^{13}\text{C}$  NMR (125 MHz,  $\text{CDCl}_3$ ) d 205.8, 176.4, 174.6, 143.8, 142.1, 136.8, 131.2, 129.8, 129.2, 128.9, 127.3, 127.0, 126.2, 125.42, 125.40, 52.1, 45.3, 41.5, 40.8, 37.4, 36.3, 31.5, 31.2, 21.3; MS (MALDI) calcd. for  $\text{C}_{28}\text{H}_{26}\text{N}_2\text{O}_5\text{S}_2\text{Na}$   $[\text{M} + \text{Na}]^+$  557.12, found 557.08; HRMS (ESI) calcd. for  $\text{C}_{28}\text{H}_{30}\text{N}_3\text{O}_5\text{S}_2$   $[\text{M} + \text{NH}_4]^+$  552.1627, found 552.1647.

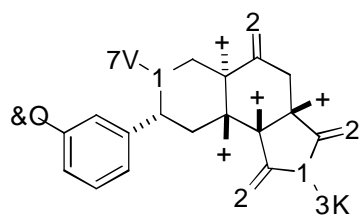

**FD**

**17ca:** 82% yield; white solid; m.p. 223–224 °C; IR (film)  $\nu_{\max}$  3064, 2924, 1712, 1393, 1156, 693  $\text{cm}^{-1}$ ;  $^1\text{H}$  NMR (400 MHz,  $\text{CDCl}_3$ ) d 7.53 (d,  $J = 8.3$  Hz, 2H), 7.45–7.35 (m, 3H), 7.25–7.17 (m, 6H), 7.14–7.10 (m, 2H), 4.96 (dd,  $J = 10.7, 7.2$  Hz, 1H), 3.99 (dd,  $J = 14.9, 2.9$  Hz, 1H), 3.47 (td,  $J = 8.6, 1.4$  Hz, 1H), 3.42–3.31 (m, 2H), 3.07 (dd,  $J = 17.7, 1.4$  Hz, 1H), 2.67 (dd,  $J = 17.7, 7.7$  Hz, 1H), 2.62–2.56 (m, 1H), 2.41 (s, 3H), 2.35–2.25 (m, 1H), 1.95–1.88 (m, 2H);  $^{13}\text{C}$  NMR (100 MHz,  $\text{CDCl}_3$ ) d 205.1, 177.0, 175.5, 144.0, 142.8, 135.7, 134.4, 131.3, 129.9, 129.7, 129.2, 129.0, 127.8, 127.7, 126.5, 126.2, 124.6, 57.7, 47.5, 41.7, 39.9, 37.5, 36.1, 33.4, 33.0, 21.6; MS (MALDI) calcd. for  $\text{C}_{30}\text{H}_{27}\text{ClN}_2\text{O}_5\text{SNa}$   $[\text{M} + \text{Na}]^+$  585.12, found 585.11; HRMS (ESI) calcd. for  $\text{C}_{30}\text{H}_{31}\text{ClN}_3\text{O}_5\text{S}$   $[\text{M} + \text{NH}_4]^+$  580.1673, found 580.1647.

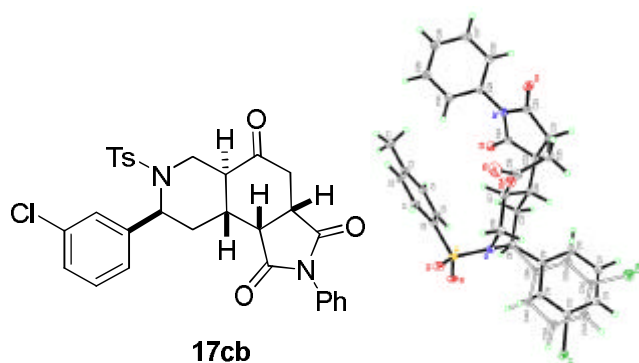

**17cb**

**17cb:** 92% yield; white solid; m.p. 200–201 °C; IR (film)  $\nu_{\max}$  3063, 2922, 1712, 1385, 1158, 665  $\text{cm}^{-1}$ ;  $^1\text{H}$  NMR (500 MHz,  $\text{CDCl}_3$ ) d 7.72 (d,  $J = 8.2$  Hz, 2H), 7.50 (t,  $J = 7.5$  Hz, 2H), 7.44 (t,  $J = 7.3$  Hz, 1H), 7.32–7.15 (m, 8H), 5.44 (s, 1H), 4.29 (dd,  $J = 15.2, 4.9$  Hz, 1H), 3.40 (t,  $J = 8.0$  Hz, 1H), 3.23 (dd,  $J = 9.5, 5.1$  Hz, 1H), 2.95 (d,  $J = 16.6$  Hz, 1H), 2.79 (dd,  $J = 15.3, 11.0$  Hz, 1H), 2.56–2.49 (m, 2H), 2.21 (s, 3H), 2.21–2.19 (m, 2H), 1.86–1.82 (m, 1H);  $^{13}\text{C}$  NMR (125 MHz,  $\text{CDCl}_3$ ) d 205.7, 176.4, 174.4, 144.0, 139.3, 137.2, 135.1, 131.2, 130.4, 130.0, 129.2, 128.8, 127.6, 126.7, 126.6, 126.1, 124.7, 53.8, 45.1, 41.4, 40.9, 37.3, 36.3, 31.3, 28.9, 21.2; MS (MALDI) calcd. for  $\text{C}_{30}\text{H}_{27}\text{ClN}_2\text{O}_5\text{SNa}$   $[\text{M} + \text{Na}]^+$  585.12, found 585.08; HRMS (ESI) calcd. for  $\text{C}_{30}\text{H}_{31}\text{ClN}_3\text{O}_5\text{S}$   $[\text{M} + \text{NH}_4]^+$  580.1673, found 580.1653.

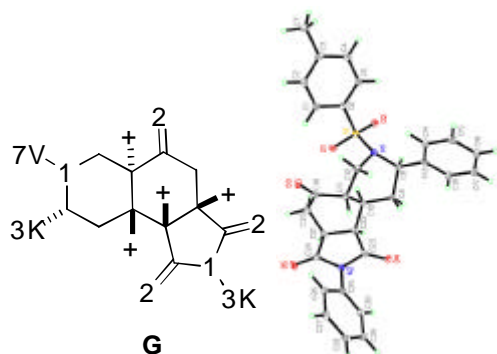

**17d**: 87% yield; yellow solid; decomposed at 200 °C; IR (film)  $\nu_{\max}$  3063, 2919, 1710, 1383, 1156, 656  $\text{cm}^{-1}$ ;  $^1\text{H}$  NMR (500 MHz,  $\text{CDCl}_3$ ) d 7.55 (d,  $J = 8.3$  Hz, 2H), 7.43 (t,  $J = 7.5$  Hz, 2H), 7.38–7.35 (m, 1H), 7.26–7.21 (m, 9H), 5.03 (dd,  $J = 10.6, 7.4$  Hz, 1H), 3.98 (dd,  $J = 15.0, 2.8$  Hz, 1H), 3.47–3.43 (m, 1H), 3.40–3.32 (m, 2H), 3.05 (dd,  $J = 17.7, 1.5$  Hz, 1H), 2.67–2.59 (m, 2H), 2.40 (s, 3H), 2.33–2.26 (m, 1H), 2.01–1.87 (m, 2H);  $^{13}\text{C}$  NMR (100 MHz,  $\text{CDCl}_3$ ) d 205.3, 177.0, 175.5, 143.7, 140.9, 135.9, 131.4, 129.6, 129.2, 128.9, 128.5, 127.9, 127.5, 126.3, 126.2, 58.0, 47.6, 41.7, 39.7, 37.5, 36.1, 33.4, 33.1, 21.6; MS (MALDI) calcd. for  $\text{C}_{30}\text{H}_{28}\text{N}_2\text{O}_5\text{SNa}$  [ $\text{M} + \text{Na}$ ] $^+$  551.16, found 551.15; HRMS (ESI) calcd. for  $\text{C}_{30}\text{H}_{29}\text{N}_2\text{O}_5\text{S}$  [ $\text{M} + \text{H}$ ] $^+$  529.1797, found 529.1805.

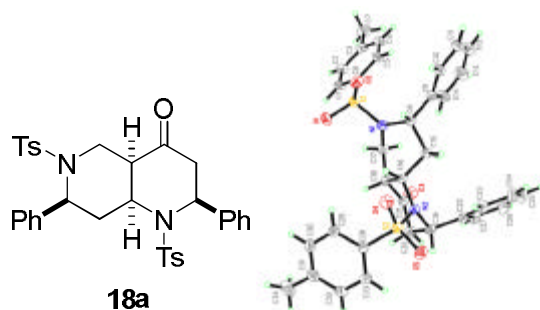

**18a**: 88% yield; white solid; m.p. 205–206 °C; IR (film)  $\nu_{\max}$  3062, 2921, 1714, 1347, 1161, 659  $\text{cm}^{-1}$ ;  $^1\text{H}$  NMR (500 MHz,  $\text{CDCl}_3$ ) d 7.78 (d,  $J = 8.3$  Hz, 2H), 7.44 (d,  $J = 8.3$  Hz, 2H), 7.40–7.37 (m, 4H), 7.23 (t,  $J = 7.5$  Hz, 2H), 7.18–7.16 (m, 3H), 7.12–7.07 (m, 3H), 6.84–6.83 (m, 2H), 5.72 (d,  $J = 6.7$  Hz, 1H), 4.92 (dd,  $J = 11.2, 7.1$  Hz, 1H), 4.63–4.58 (m, 1H), 3.81 (dd,  $J = 15.3, 8.0$  Hz, 1H), 3.43 (dd,  $J = 15.3, 9.2$  Hz, 1H), 2.95 (dd,  $J = 14.8, 2.0$  Hz, 1H), 2.68 (dd,  $J = 17.5, 8.9$  Hz, 1H), 2.49 (s, 3H), 2.38 (s, 3H), 2.23 (dd,  $J = 14.1, 7.2$  Hz, 1H), 1.76 (ddd,  $J = 13.6, 7.0, 2.0$  Hz, 1H), 0.95 (td,  $J = 13.5, 11.4$  Hz, 1H);  $^{13}\text{C}$  NMR (125 MHz,  $\text{CDCl}_3$ ) d 206.6, 144.2, 143.2, 140.2, 139.4, 137.4, 137.0, 130.3, 129.4, 128.5, 128.2, 128.0, 127.3, 127.0, 126.7, 125.8,

58.5, 55.1, 53.3, 45.4, 41.4, 40.5, 36.3, 21.6, 21.4; MS (MALDI) calcd. for  $C_{34}H_{34}N_2O_5S_2Na$  [ $M + Na$ ] $^+$  637.18, found 637.08; HRMS (ESI) calcd. for  $C_{34}H_{35}N_2O_5S_2$  [ $M + H$ ] $^+$  615.1987, found 615.1975.

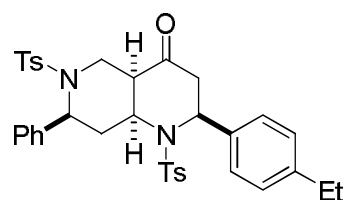

**18b**

**18b:** 90% yield; white solid; m.p. 210–211 °C; IR (film)  $\nu_{max}$  3024, 2964, 2923, 1716, 1347, 1093, 659  $cm^{-1}$ ;  $^1H$  NMR (500 MHz,  $CDCl_3$ ) d 7.75 (d,  $J = 8.3$  Hz, 2H), 7.45 (d,  $J = 8.2$  Hz, 2H), 7.37 (d,  $J = 8.2$  Hz, 2H), 7.26 (d,  $J = 8.0$  Hz, 2H), 7.19 (d,  $J = 8.3$  Hz, 2H), 7.12–7.03 (m, 5H), 6.83 (d,  $J = 6.7$  Hz, 2H), 5.69 (d,  $J = 6.5$  Hz, 1H), 4.90 (dd,  $J = 11.3, 7.1$  Hz, 1H), 4.59–4.54 (m, 1H), 3.81 (dd,  $J = 15.3, 8.0$  Hz, 1H), 3.40 (dd,  $J = 15.3, 9.3$  Hz, 1H), 2.93 (dd,  $J = 14.9, 1.9$  Hz, 1H), 2.66 (dd,  $J = 17.5, 8.9$  Hz, 1H), 2.51 (q,  $J = 7.6$  Hz, 2H), 2.48 (s, 3H), 2.38 (s, 3H), 2.22 (dd,  $J = 14.5, 7.3$  Hz, 1H), 1.75 (ddd,  $J = 13.5, 7.1, 2.1$  Hz, 1H), 1.06 (t,  $J = 7.6$  Hz, 3H), 0.92 (td,  $J = 13.5, 11.5$  Hz, 1H);  $^{13}C$  NMR (125 MHz,  $CDCl_3$ ) d 206.7, 144.4, 144.1, 143.2, 140.2, 137.5, 137.1, 136.6, 130.3, 129.4, 128.1, 128.0, 127.4, 127.3, 127.0, 126.6, 125.8, 58.3, 54.9, 53.1, 45.4, 41.5, 40.5, 36.6, 28.3, 21.6, 21.4, 15.6; MS (MALDI) calcd. for  $C_{36}H_{38}N_2O_5S_2Na$  [ $M + Na$ ] $^+$  665.21, found 665.20; HRMS (ESI) calcd. for  $C_{36}H_{39}N_2O_5S_2$  [ $M + H$ ] $^+$  643.2300, found 643.2287.

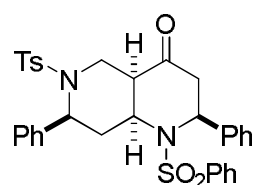

**18c**

**18c:** 89% yield; white solid; m.p. 173–174 °C; IR (film)  $\nu_{max}$  3062, 3027, 2917, 1715, 1347, 1163, 660  $cm^{-1}$ ;  $^1H$  NMR (500 MHz,  $CDCl_3$ ) d 7.89 (d,  $J = 7.4$  Hz, 2H), 7.67 (t,  $J = 7.4$  Hz, 1H), 7.60 (t,  $J = 7.6$  Hz, 2H), 7.45 (d,  $J = 8.2$  Hz, 2H), 7.38 (d,  $J = 7.6$  Hz, 2H), 7.24–7.08 (m, 8H), 6.84 (d,  $J = 6.7$  Hz, 2H), 5.73 (d,  $J = 6.5$  Hz, 1H), 4.93 (dd,  $J = 11.1, 7.1$  Hz, 1H), 4.61 (t,  $J = 10.5$  Hz, 1H), 3.80 (dd,  $J = 15.4, 8.0$  Hz, 1H), 3.44 (dd,  $J = 15.3, 9.2$  Hz, 1H), 2.96 (dd,  $J = 14.8, 1.5$  Hz, 1H), 2.67 (dd,  $J = 17.4, 8.7$  Hz, 1H), 2.37 (s, 3H), 2.22 (dd,  $J = 14.7, 7.1$  Hz, 1H), 1.78

(ddd,  $J = 13.3, 7.0, 1.8$  Hz, 1H), 0.97 (td,  $J = 12.5, 11.6$  Hz, 1H);  $^{13}\text{C}$  NMR (125 MHz,  $\text{CDCl}_3$ )  $\delta$  206.4, 143.3, 140.3, 140.1, 139.2, 137.0, 133.2, 129.7, 129.5, 128.5, 128.2, 128.0, 127.34, 127.31, 127.0, 126.6, 125.8, 58.4, 55.2, 53.4, 45.4, 41.4, 40.4, 36.3, 21.4; MS (MALDI) calcd. for  $\text{C}_{33}\text{H}_{32}\text{N}_2\text{O}_5\text{S}_2\text{Na}$   $[\text{M} + \text{Na}]^+$  623.16, found 623.09; HRMS (ESI) calcd. for  $\text{C}_{33}\text{H}_{33}\text{N}_2\text{O}_5\text{S}_2$   $[\text{M} + \text{H}]^+$  601.1831, found 601.1792.

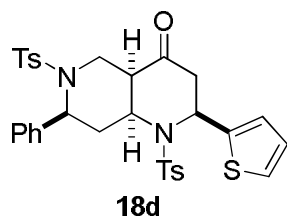

**18d:** 89% yield; white solid; m.p. 192–193 °C; IR (film)  $\nu_{\text{max}}$  3062, 3030, 2915, 1716, 1346, 1160, 660  $\text{cm}^{-1}$ ;  $^1\text{H}$  NMR (500 MHz,  $\text{CDCl}_3$ )  $\delta$  7.77 (d,  $J = 8.2$  Hz, 2H), 7.45 (d,  $J = 8.2$  Hz, 2H), 7.38 (d,  $J = 8.2$  Hz, 2H), 7.18–7.11 (m, 6H), 6.93–6.91 (m, 2H), 6.80–6.75 (m, 2H), 5.84 (d,  $J = 6.7$  Hz, 1H), 4.93 (dd,  $J = 11.3, 7.1$  Hz, 1H), 4.57 (t,  $J = 12.4$  Hz, 1H), 3.88 (dd,  $J = 15.3, 7.9$  Hz, 1H), 3.50 (dd,  $J = 15.4, 9.4$  Hz, 1H), 2.96 (dd,  $J = 14.6, 1.6$  Hz, 1H), 2.78 (dd,  $J = 17.4, 9.0$  Hz, 1H), 2.48 (s, 3H), 2.44–2.39 (m, 1H), 2.37 (s, 3H), 1.98 (ddd,  $J = 13.6, 7.0, 2.4$  Hz, 1H), 1.16 (td,  $J = 13.4, 11.5$  Hz, 1H);  $^{13}\text{C}$  NMR (125 MHz,  $\text{CDCl}_3$ )  $\delta$  205.8, 144.2, 144.1, 143.2, 140.3, 137.2, 137.0, 130.2, 129.5, 128.3, 127.4, 127.0, 126.8, 126.5, 126.4, 125.8, 58.5, 53.3, 52.4, 45.6, 43.1, 40.5, 35.8, 21.5, 21.4; MS (MALDI) calcd. for  $\text{C}_{32}\text{H}_{32}\text{N}_2\text{O}_5\text{S}_3\text{Na}$   $[\text{M} + \text{Na}]^+$  643.14, found 643.15; HRMS (ESI) calcd. for  $\text{C}_{32}\text{H}_{33}\text{N}_2\text{O}_5\text{S}_3$   $[\text{M} + \text{H}]^+$  621.1551, found 621.1517.

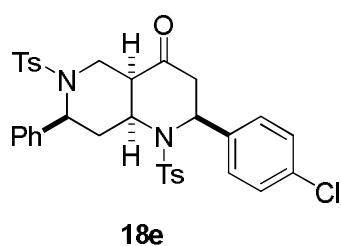

**18e:** 91% yield; white solid; m.p. 217–218 °C; IR (film)  $\nu_{\text{max}}$  3063, 3027, 2917, 1715, 1347, 1162, 659  $\text{cm}^{-1}$ ;  $^1\text{H}$  NMR (500 MHz,  $\text{CDCl}_3$ )  $\delta$  7.78 (d,  $J = 8.1$  Hz, 2H), 7.44 (d,  $J = 8.2$  Hz, 2H), 7.39 (d,  $J = 8.1$  Hz, 2H), 7.33 (d,  $J = 8.5$  Hz, 2H), 7.22–7.10 (m, 7H), 6.86 (d,  $J = 6.3$  Hz, 2H), 5.67 (d,  $J = 6.5$  Hz, 1H), 4.95 (dd,  $J = 11.1, 7.0$  Hz, 1H), 4.64 (t,  $J = 10.3$  Hz, 1H), 3.77 (dd,  $J = 15.4, 8.0$  Hz, 1H), 3.46 (dd,  $J = 15.4, 9.4$  Hz, 1H), 2.90 (dd,  $J = 14.7, 1.9$  Hz, 1H), 2.69 (dd,  $J = 17.4, 8.8$  Hz, 1H), 2.49 (s, 3H), 2.38 (s, 3H), 2.24 (dd,  $J = 14.7, 7.1$  Hz, 1H), 1.81 (ddd,  $J = 13.4,$



6.9, 2.1 Hz, 1H), 0.99 (td,  $J = 13.5, 11.5$  Hz, 1H);  $^{13}\text{C}$  NMR (125 MHz,  $\text{CDCl}_3$ )  $\delta$  206.2, 144.3, 143.3, 140.0, 138.0, 137.1, 137.0, 134.0, 130.4, 129.4, 128.8, 128.7, 128.3, 127.4, 127.1, 126.6, 125.8, 58.4, 54.9, 53.5, 45.5, 41.3, 40.3, 36.5, 21.5, 21.4; MS (MALDI) calcd. for  $\text{C}_{34}\text{H}_{33}\text{ClN}_2\text{O}_5\text{S}_2\text{Na}$   $[\text{M} + \text{Na}]^+$  671.14, found 671.13; HRMS (MALDI) calcd. for  $\text{C}_{34}\text{H}_{34}\text{ClN}_2\text{O}_5\text{S}_2$   $[\text{M} + \text{H}]^+$  649.1597, found 649.1586.

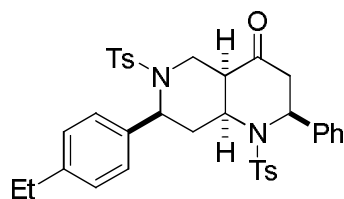

**18f**

**18f:** 90% yield; white solid; m.p. 186–187 °C; IR (film)  $\nu_{\text{max}}$  3057, 2964, 2921, 1716, 1347, 1162, 660  $\text{cm}^{-1}$ ;  $^1\text{H}$  NMR (500 MHz,  $\text{CDCl}_3$ )  $\delta$  7.77 (d,  $J = 8.1$  Hz, 2H), 7.42–7.36 (m, 6H), 7.23 (d,  $J = 7.5$  Hz, 2H), 7.18–7.14 (m, 3H), 6.90 (d,  $J = 8.0$  Hz, 2H), 6.75 (d,  $J = 8.0$  Hz, 2H), 5.71 (d,  $J = 6.4$  Hz, 1H), 4.87 (dd,  $J = 11.1, 7.0$  Hz, 1H), 4.60 (t,  $J = 10.5$  Hz, 1H), 3.78 (dd,  $J = 15.3, 8.0$  Hz, 1H), 3.47 (dd,  $J = 15.3, 9.1$  Hz, 1H), 2.95 (dd,  $J = 15.0, 1.5$  Hz, 1H), 2.68 (dd,  $J = 17.3, 8.7$  Hz, 1H), 2.52 (q,  $J = 7.6$  Hz, 2H), 2.47 (s, 3H), 2.36 (s, 3H), 2.24 (dd,  $J = 14.7, 7.1$  Hz, 1H), 1.76–1.73 (m, 1H), 1.16 (t,  $J = 7.6$  Hz, 3H), 1.01 (td,  $J = 12.5, 11.7$  Hz, 1H);  $^{13}\text{C}$  NMR (125 MHz,  $\text{CDCl}_3$ )  $\delta$  206.6, 144.2, 143.4, 143.0, 139.5, 137.4, 137.22, 137.21, 130.3, 129.4, 128.5, 128.0, 127.6, 127.3, 127.0, 126.6, 126.0, 58.4, 55.2, 53.4, 45.6, 41.1, 40.4, 36.3, 28.3, 21.5, 21.4, 15.4; MS (MALDI) calcd. for  $\text{C}_{36}\text{H}_{38}\text{N}_2\text{O}_5\text{S}_2\text{Na}$   $[\text{M} + \text{Na}]^+$  665.21, found 665.18; HRMS (ESI) calcd. for  $\text{C}_{36}\text{H}_{39}\text{N}_2\text{O}_5\text{S}_2$   $[\text{M} + \text{H}]^+$  643.2300, found 643.2286.

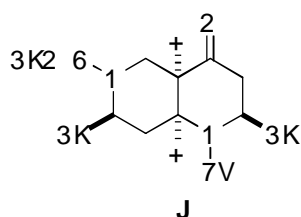

**J**

**18g:** 89% yield; white solid; m.p. 202–203 °C; IR (film)  $\nu_{\text{max}}$  3063, 3027, 2917, 1714, 1348, 1162, 660  $\text{cm}^{-1}$ ;  $^1\text{H}$  NMR (500 MHz,  $\text{CDCl}_3$ )  $\delta$  7.78 (d,  $J = 8.1$  Hz, 2H), 7.52 (d,  $J = 7.5$  Hz, 2H), 7.48 (t,  $J = 7.5$  Hz, 1H), 7.39–7.34 (m, 6H), 7.22 (t,  $J = 7.5$  Hz, 2H), 7.15 (t,  $J = 7.2$  Hz, 1H), 7.12–7.05 (m, 3H), 6.81 (d,  $J = 7.2$  Hz, 2H), 5.74 (d,  $J = 6.5$  Hz, 1H), 4.93 (dd,  $J = 11.2, 7.0$  Hz, 1H), 4.62 (t,  $J = 10.5$  Hz, 1H), 3.83 (dd,  $J = 15.3, 7.9$  Hz, 1H), 3.48 (dd,  $J = 15.3, 9.2$  Hz, 1H),

2.97 (dd,  $J = 14.8, 1.3$  Hz, 1H), 2.69 (dd,  $J = 17.3, 8.7$  Hz, 1H), 2.48 (s, 3H), 2.27 (dd,  $J = 14.7, 7.1$  Hz, 1H), 1.76 (ddd,  $J = 13.5, 6.8, 2.0$  Hz, 1H), 0.98 (td,  $J = 12.5, 11.7$  Hz, 1H);  $^{13}\text{C}$  NMR (125 MHz,  $\text{CDCl}_3$ )  $\delta$  206.5, 144.2, 140.0, 139.9, 139.4, 137.3, 132.3, 130.4, 128.8, 128.5, 128.2, 128.0, 127.4, 127.3, 126.9, 126.7, 125.9, 58.7, 55.1, 53.3, 45.6, 41.4, 40.6, 36.4, 21.5; MS (MALDI) calcd. for  $\text{C}_{33}\text{H}_{32}\text{N}_2\text{O}_5\text{S}_2\text{Na}$   $[\text{M} + \text{Na}]^+$  623.16, found 623.10; HRMS (ESI) calcd. for  $\text{C}_{33}\text{H}_{33}\text{N}_2\text{O}_5\text{S}_2$   $[\text{M} + \text{H}]^+$  601.1831, found 601.1801.

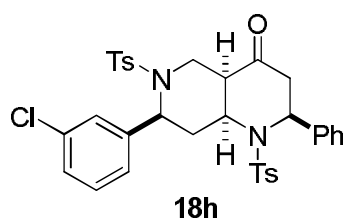

**18h:** 85% yield; white solid; m.p. 183–184 °C; IR (film)  $\nu_{\text{max}}$  3063, 2920, 1714, 1348, 1162, 660  $\text{cm}^{-1}$ ;  $^1\text{H}$  NMR (500 MHz,  $\text{CDCl}_3$ )  $\delta$  7.76 (d,  $J = 8.2$  Hz, 2H), 7.46 (d,  $J = 8.3$  Hz, 2H), 7.39–7.37 (m, 4H), 7.25–7.16 (m, 5H), 7.07–7.01 (m, 2H), 6.75 (d,  $J = 7.4$  Hz, 1H), 6.63 (s, 1H), 5.72 (d,  $J = 6.7$  Hz, 1H), 4.80 (dd,  $J = 11.3, 6.8$  Hz, 1H), 4.59–4.54 (m, 1H), 3.79 (dd,  $J = 15.2, 7.8$  Hz, 1H), 3.46 (dd,  $J = 15.3, 8.9$  Hz, 1H), 2.96 (dd,  $J = 14.8, 1.9$  Hz, 1H), 2.66 (dd,  $J = 17.1, 8.6$  Hz, 1H), 2.47 (s, 3H), 2.38 (s, 3H), 2.24 (dd,  $J = 14.7, 7.1$  Hz, 1H), 1.71 (ddd,  $J = 13.6, 6.8, 2.3$  Hz, 1H), 0.87 (td,  $J = 13.4, 11.5$  Hz, 1H);  $^{13}\text{C}$  NMR (125 MHz,  $\text{CDCl}_3$ )  $\delta$  206.3, 144.2, 143.6, 142.0, 139.4, 137.3, 136.9, 134.0, 130.3, 129.6, 129.5, 128.6, 128.1, 127.5, 127.3, 127.0, 126.6, 126.0, 124.3, 58.0, 55.1, 53.2, 45.4, 41.4, 40.7, 36.4, 21.6, 21.4; MS (MALDI) calcd. for  $\text{C}_{34}\text{H}_{33}\text{ClN}_2\text{O}_5\text{S}_2\text{Na}$   $[\text{M} + \text{Na}]^+$  671.14, found 671.14; HRMS (MALDI) calcd. for  $\text{C}_{34}\text{H}_{34}\text{ClN}_2\text{O}_5\text{S}_2\text{Na}$   $[\text{M} + \text{H}]^+$  649.1597, found 649.1590.

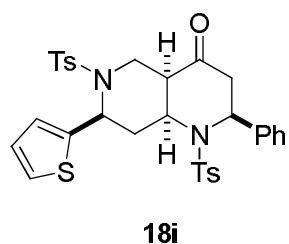

**18i:** 95% yield; white solid; decomposed at 210 °C; IR (film)  $\nu_{\text{max}}$  3063, 2921, 1713, 1347, 1161, 660  $\text{cm}^{-1}$ ;  $^1\text{H}$  NMR (500 MHz,  $\text{CDCl}_3$ )  $\delta$  7.81 (d,  $J = 8.2$  Hz, 2H), 7.51 (d,  $J = 8.3$  Hz, 2H), 7.42–7.38 (m, 4H), 7.29 (t,  $J = 7.5$  Hz, 2H), 7.25–7.20 (m, 3H), 7.02 (dd,  $J = 5.0, 1.1$  Hz, 1H), 6.75 (dd,  $J = 5.0, 3.5$  Hz, 1H), 6.55 (d,  $J = 3.5$  Hz, 1H), 5.77 (d,  $J = 6.7$  Hz, 1H), 5.28 (dd,  $J = 10.8,$

7.7 Hz, 1H), 4.62 (t,  $J = 10.5$  Hz, 1H), 3.66 (dd,  $J = 15.4, 8.1$  Hz, 1H), 3.29 (dd,  $J = 15.4, 9.5$  Hz, 1H), 2.97 (dd,  $J = 14.8, 1.7$  Hz, 1H), 2.69 (dd,  $J = 17.9, 9.0$  Hz, 1H), 2.48 (s, 3H), 2.38 (s, 3H), 2.25 (dd,  $J = 14.4, 7.2$  Hz, 1H), 1.83 (ddd,  $J = 13.6, 7.6, 2.1$  Hz, 1H), 1.03 (td,  $J = 13.5, 11.0$  Hz, 1H);  $^{13}\text{C}$  NMR (125 MHz,  $\text{CDCl}_3$ ) d 206.8, 144.2, 143.7, 143.4, 139.5, 137.4, 136.8, 130.3, 129.5, 128.6, 128.1, 127.5, 127.1, 126.7, 126.3, 125.0, 124.6, 55.0, 53.5, 52.8, 45.3, 41.4, 39.2, 36.1, 21.6, 21.4; MS (MALDI) calcd. for  $\text{C}_{32}\text{H}_{32}\text{N}_2\text{O}_5\text{S}_3\text{Na}$   $[\text{M} + \text{Na}]^+$  643.14, found 643.10; HRMS (ESI) calcd. for  $\text{C}_{32}\text{H}_{33}\text{N}_2\text{O}_5\text{S}_3$   $[\text{M} + \text{H}]^+$  621.1551, found 621.1550.

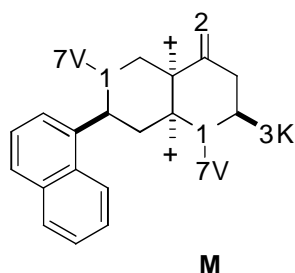

**18j**: 80% yield; white solid; decomposed at 218 °C; IR (film)  $\nu_{\text{max}}$  3062, 2914, 1715, 1348, 1162, 660  $\text{cm}^{-1}$ ;  $^1\text{H}$  NMR (400 MHz,  $\text{CDCl}_3$ ) d 7.83 (d,  $J = 8.2$  Hz, 3H), 7.75 (d,  $J = 7.5$  Hz, 1H), 7.61 (d,  $J = 8.1$  Hz, 1H), 7.52–7.37 (m, 6H), 7.32 (d,  $J = 7.8$  Hz, 2H), 7.16–7.06 (m, 5H), 7.00 (t,  $J = 7.8$  Hz, 2H), 5.71 (d,  $J = 5.9$  Hz, 1H), 5.63 (dd,  $J = 11.6, 6.3$  Hz, 1H), 4.77–4.71 (m, 1H), 4.02 (dd,  $J = 15.4, 7.8$  Hz, 1H), 3.67 (dd,  $J = 15.4, 9.2$  Hz, 1H), 2.97 (dd,  $J = 14.8, 2.3$  Hz, 1H), 2.81 (dd,  $J = 17.3, 8.8$  Hz, 1H), 2.51 (s, 3H), 2.32 (s, 3H), 2.32–2.27 (m, 1H), 1.98 (ddd,  $J = 13.8, 6.2, 2.3$  Hz, 1H), 1.03 (td,  $J = 13.5, 11.9$  Hz, 1H);  $^{13}\text{C}$  NMR (100 MHz,  $\text{CDCl}_3$ ) d 206.7, 144.3, 143.3, 139.2, 137.5, 136.8, 136.3, 133.6, 130.4, 129.8, 129.3, 128.7, 128.6, 128.1, 128.0, 127.3, 127.2, 126.8, 126.4, 125.6, 125.1, 122.8, 122.5, 56.0, 55.3, 53.9, 46.0, 41.7, 41.6, 37.1, 21.7, 21.5; MS (MALDI) calcd. for  $\text{C}_{38}\text{H}_{36}\text{N}_2\text{O}_5\text{S}_2\text{Na}$   $[\text{M} + \text{Na}]^+$  687.20, found 687.23; HRMS (ESI) calcd. for  $\text{C}_{38}\text{H}_{37}\text{N}_2\text{O}_5\text{S}_2$   $[\text{M} + \text{H}]^+$  665.2143, found 665.2134.

**Crystallographic Data for 7d, 8a, 9a, 10a, 11aa, 11ab, 12a, 13a, 14a, 14c', 15a, 16b, 17cb, 17d, and 18a**

Crystallographic data for **7d, 8a, 9a, 10a, 11aa, 11ab, 12a, 13a, 14a, 15a, 16b, 17cb, 17d, 18a,** and **14c'** have been deposited with the Cambridge Crystallographic Data Centre as supplementary numbers CCDC 767099–767112 and CCDC 782217. These data can be obtained online free of charge [or from the Cambridge Crystallographic Data Center, 12, Union Road, Cambridge CB2 1EZ, UK; fax: (+44) 1223-336-033; or [deposit@ccdc.cam.ac.uk](mailto:deposit@ccdc.cam.ac.uk)].

Wang *et al.*

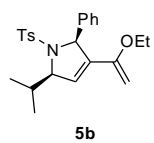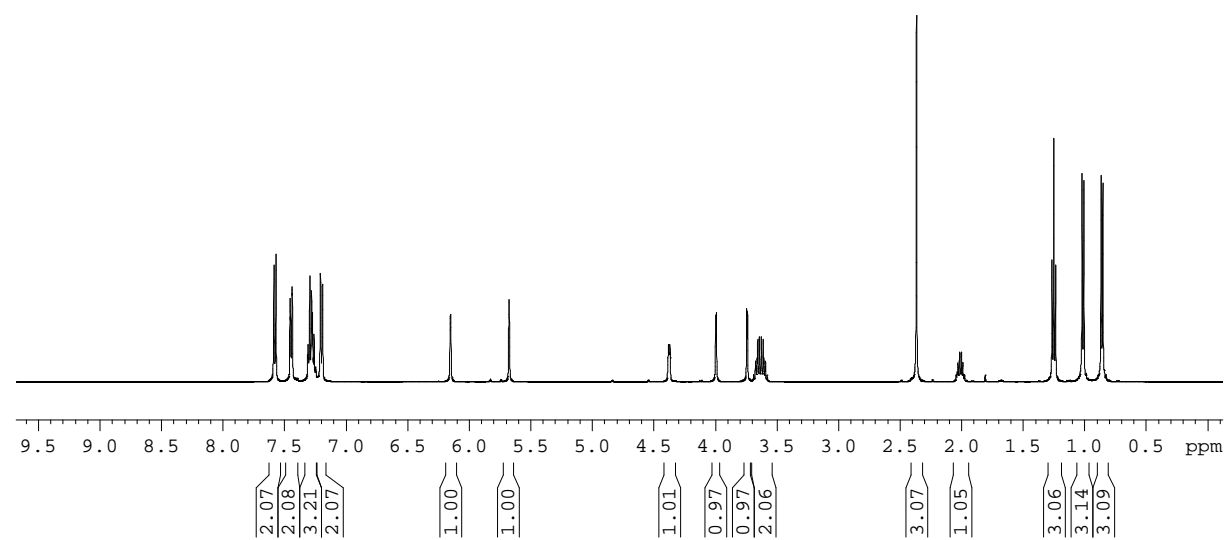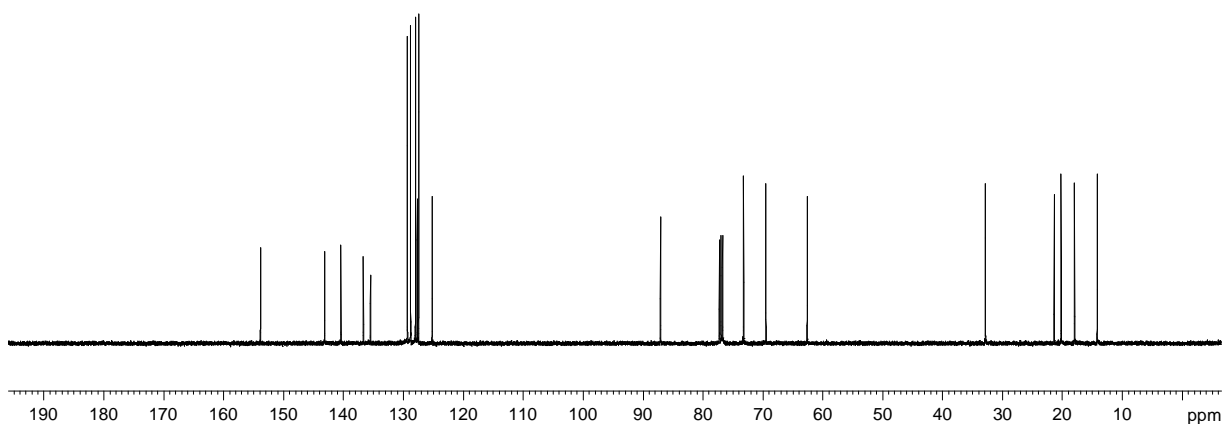

Wang *et al.*

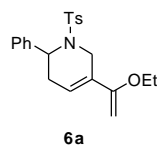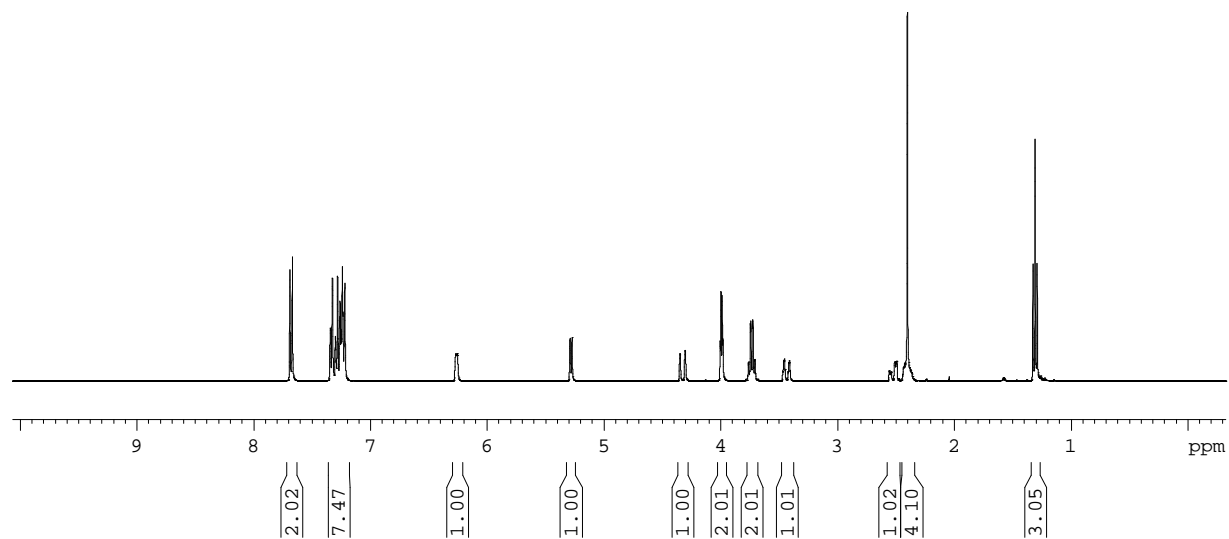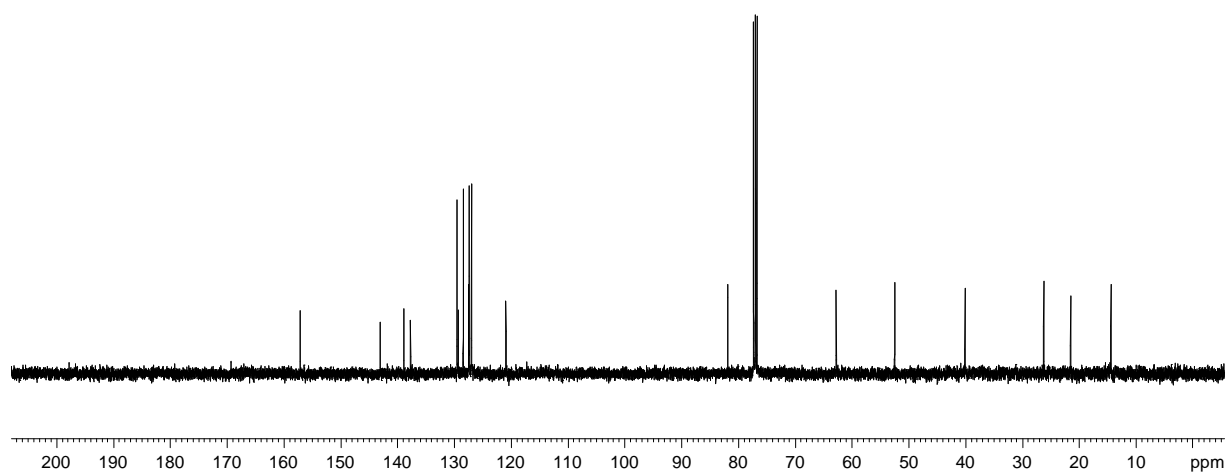

Wang *et al.*

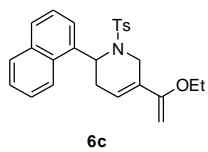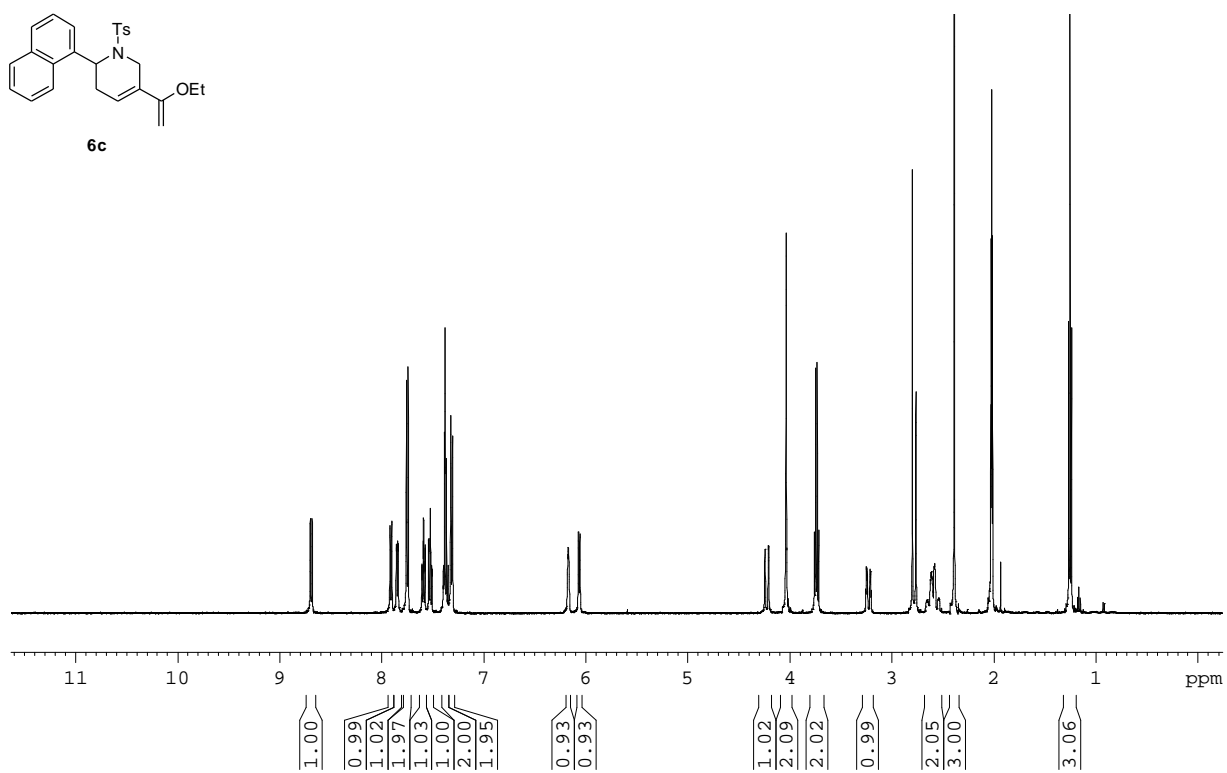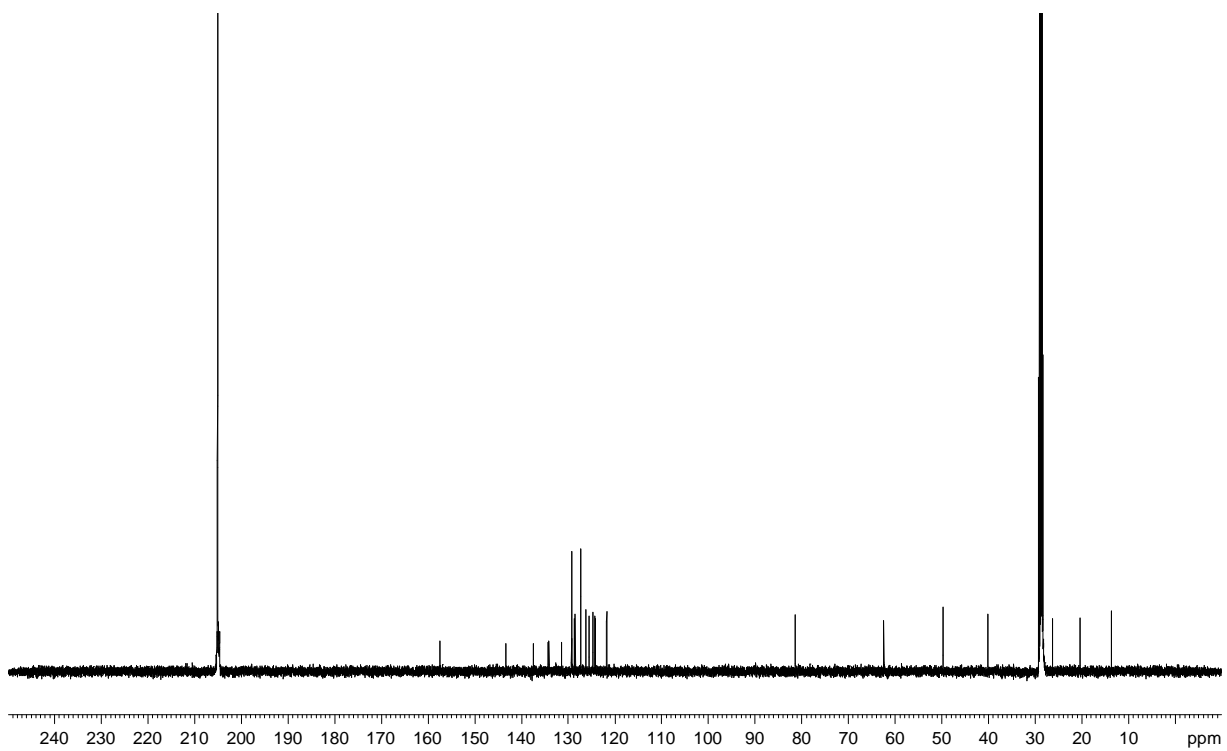

Wang *et al.*

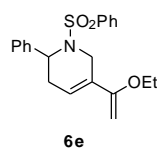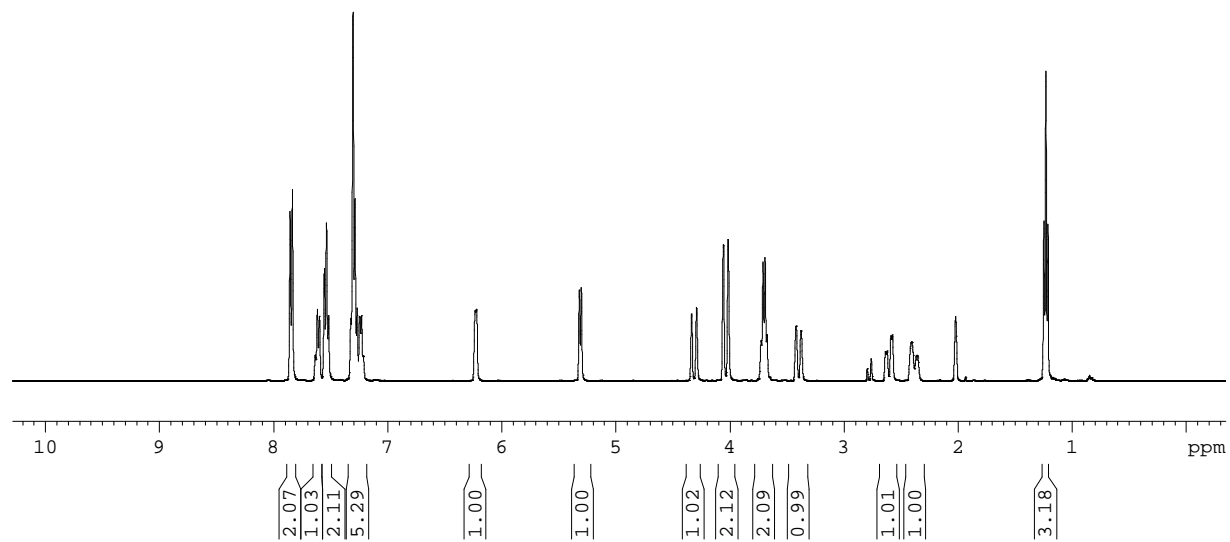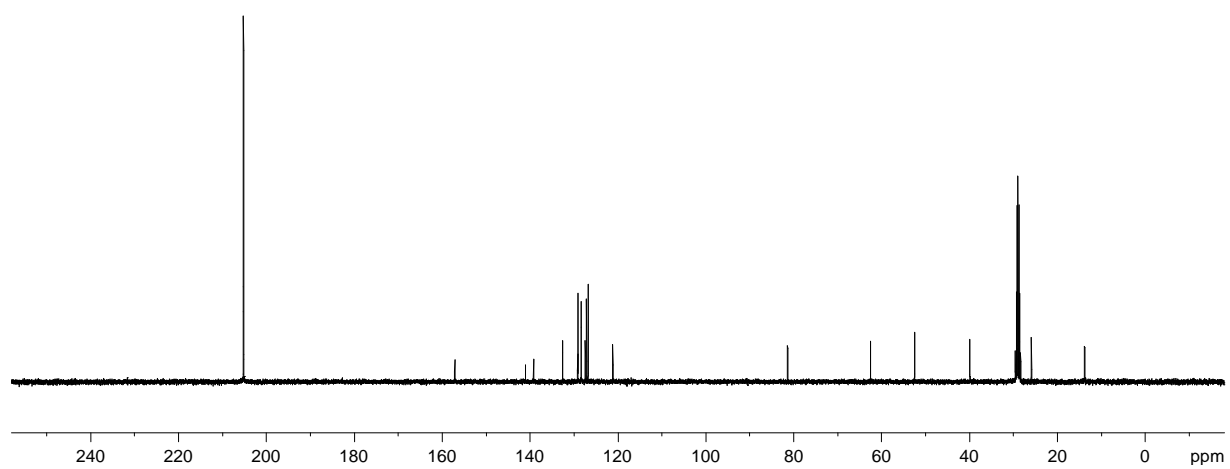



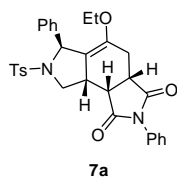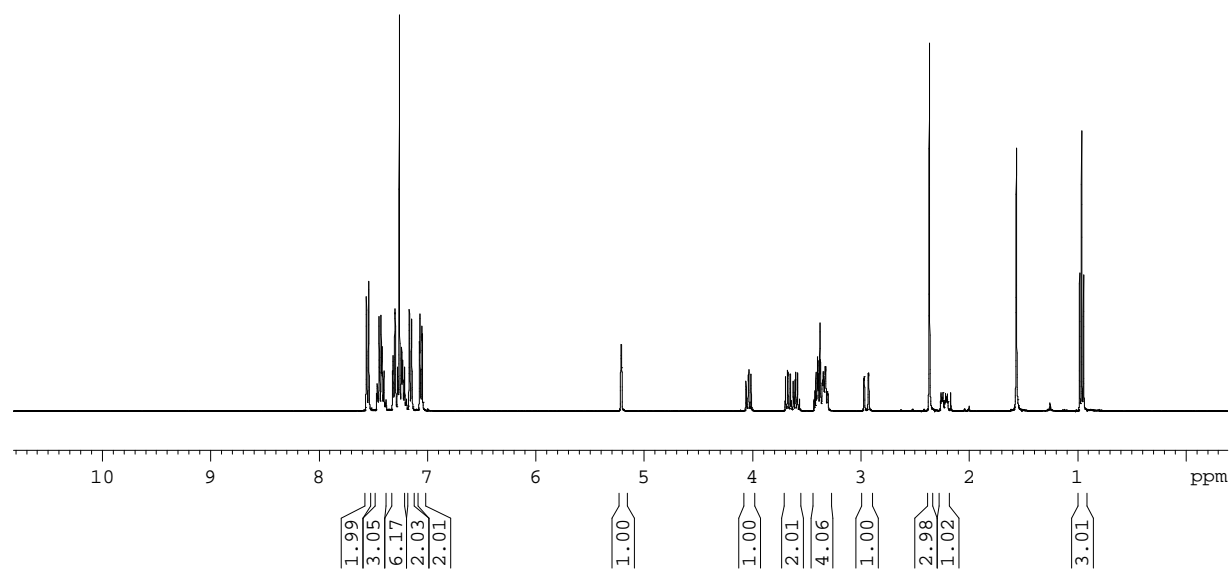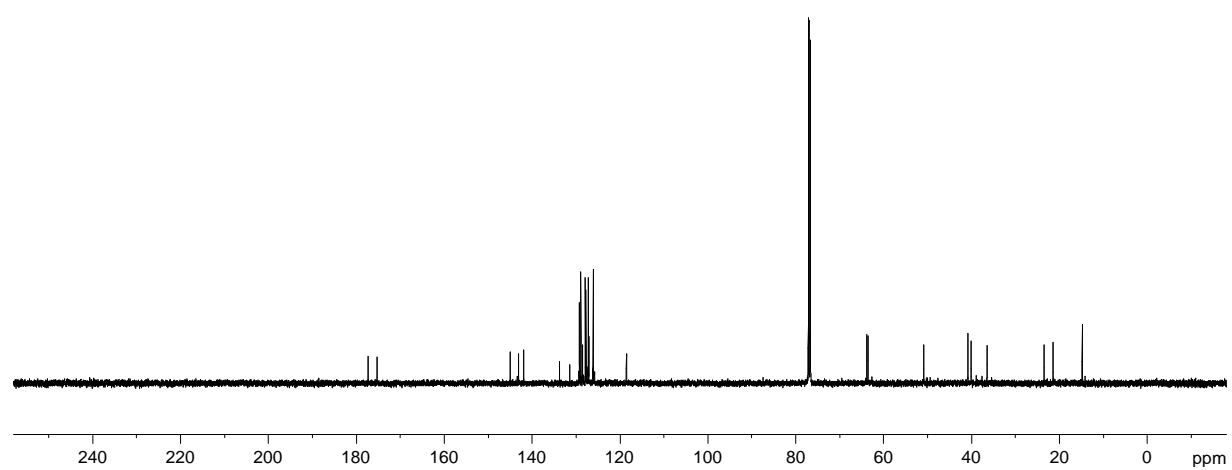

Wang *et al.*

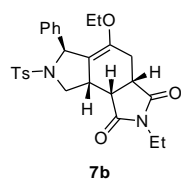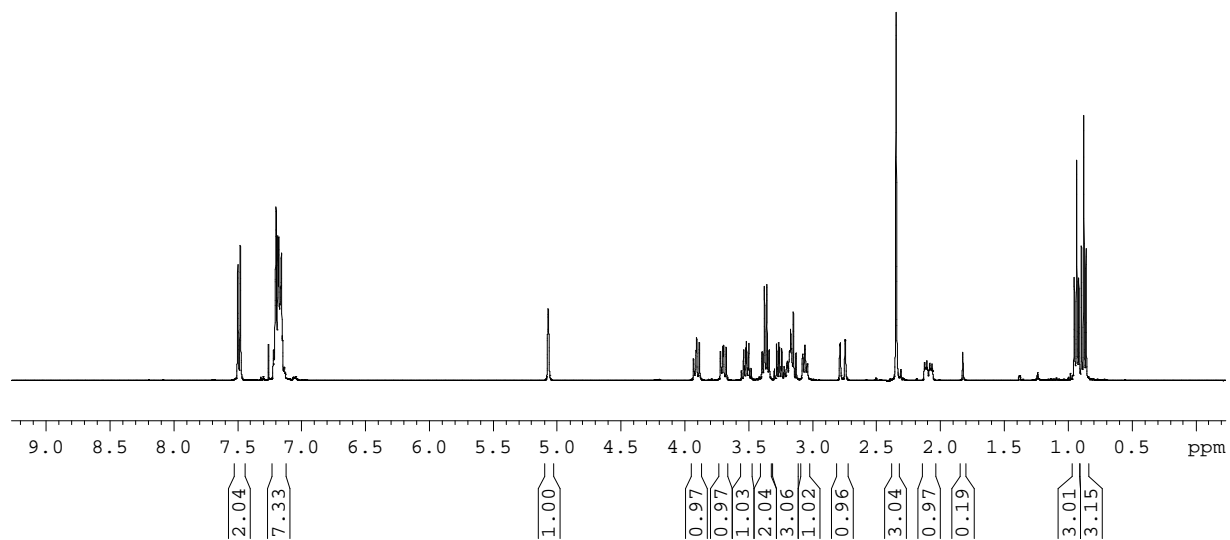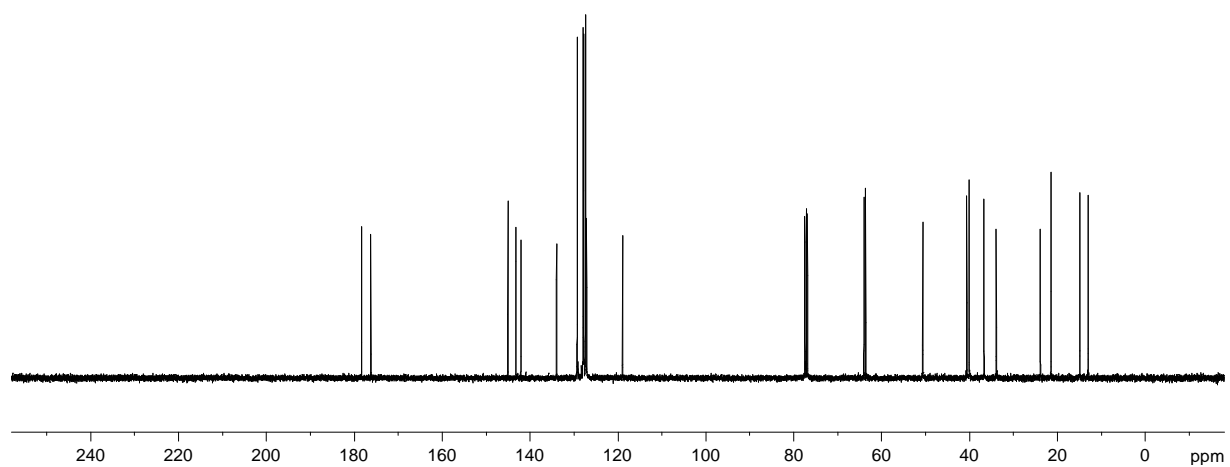

Wang *et al.*

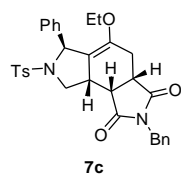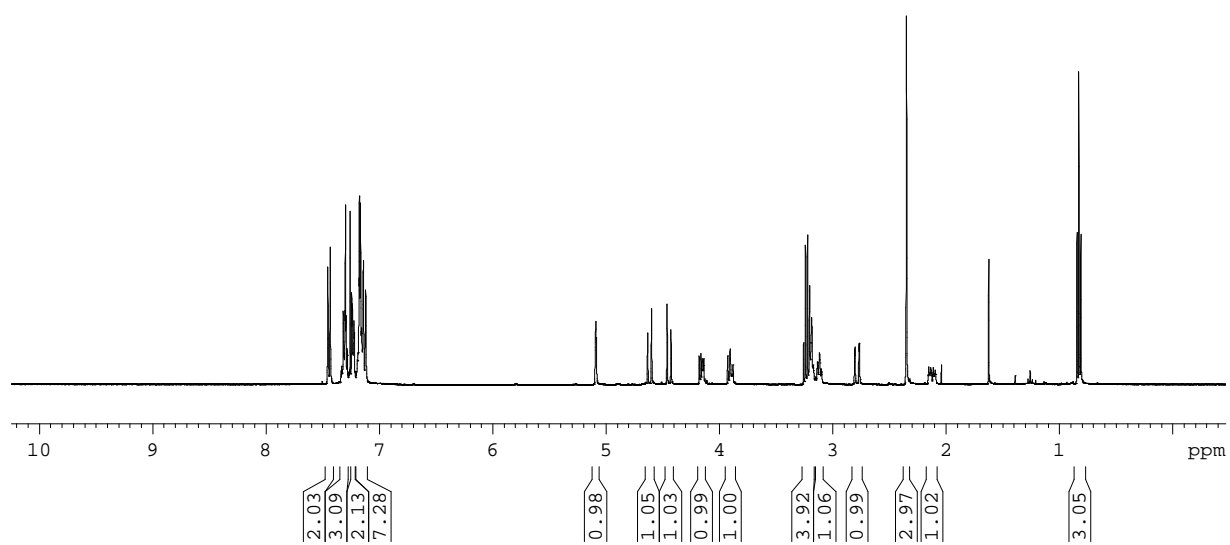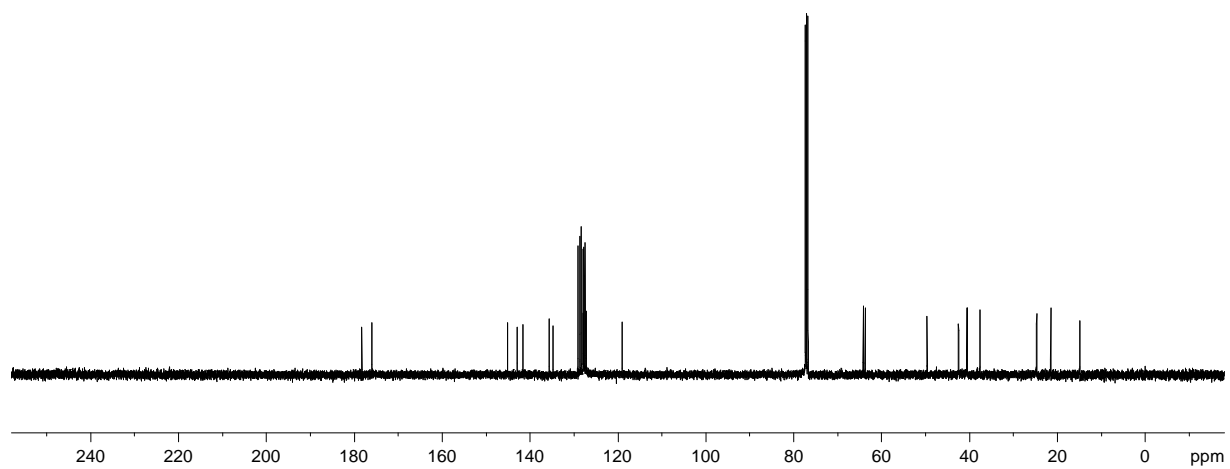

Wang *et al.*

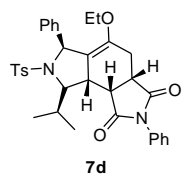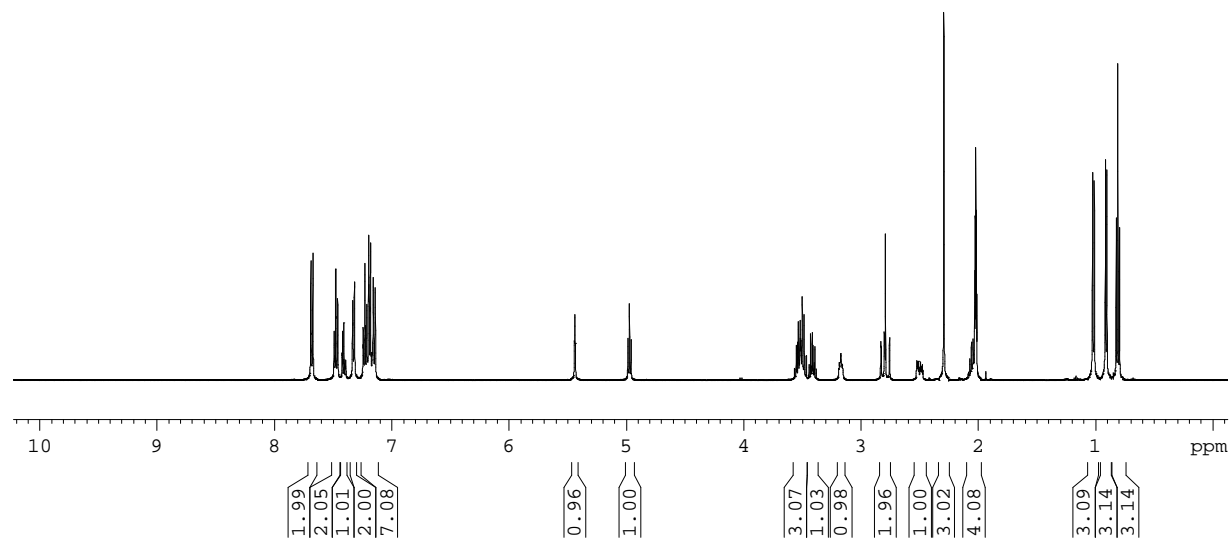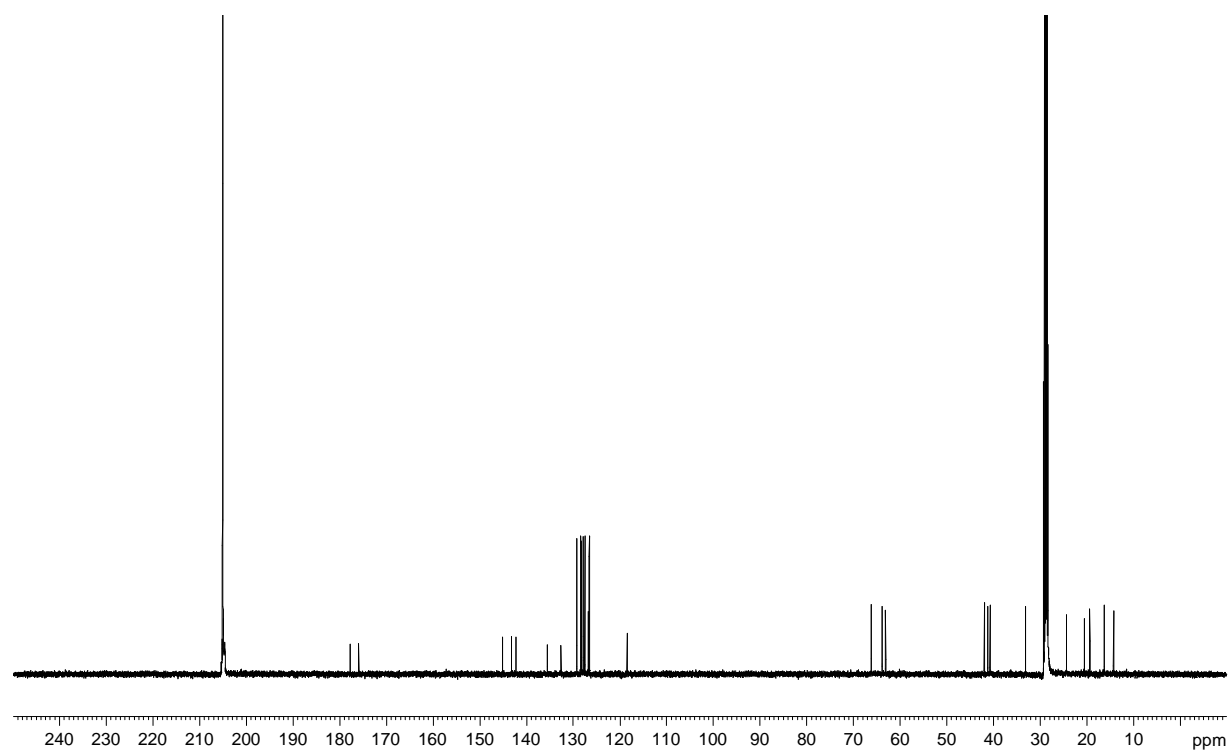

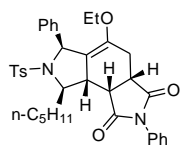

7e

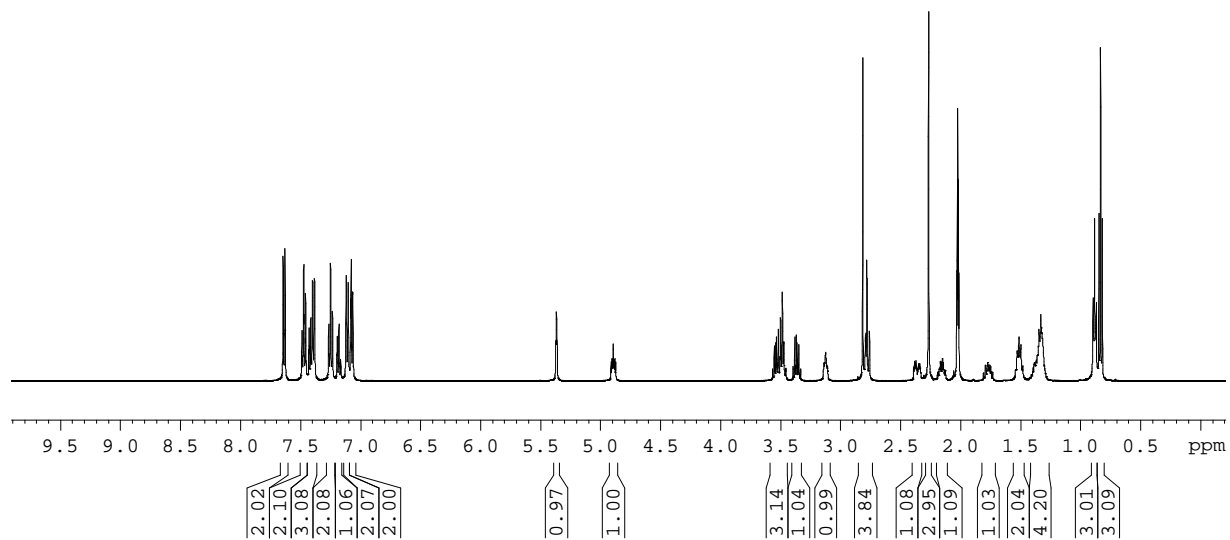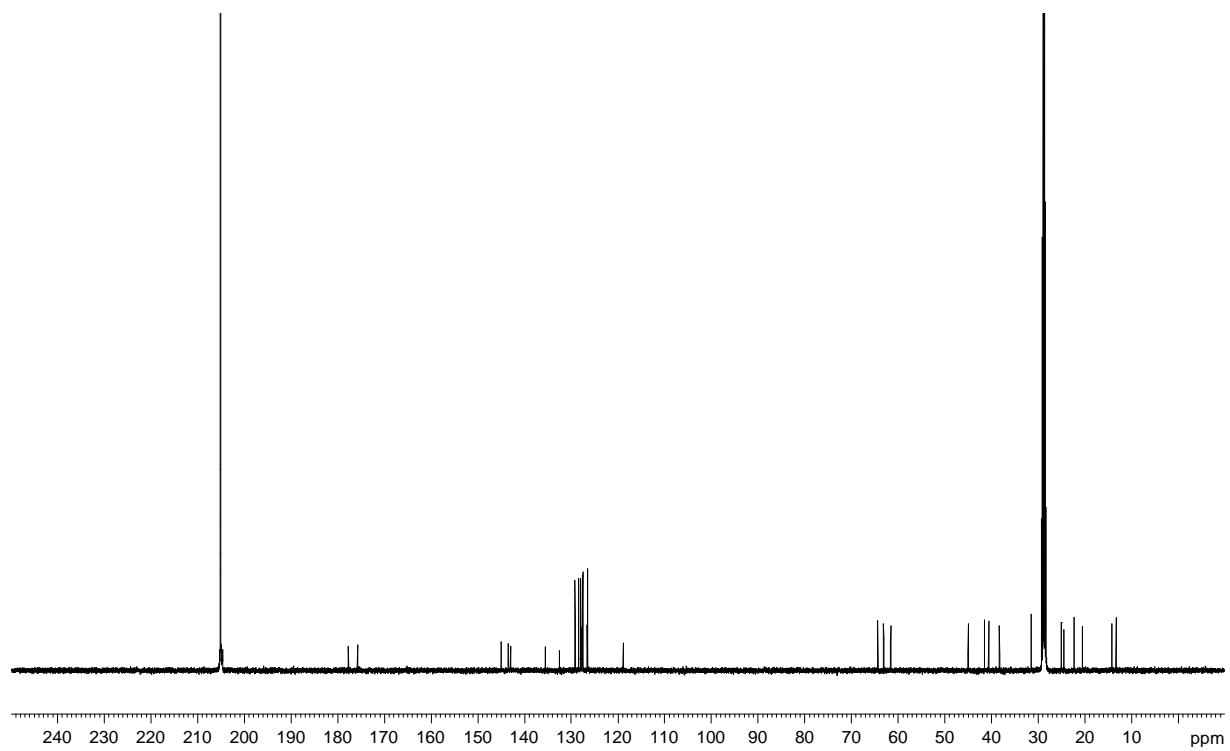

Wang *et al.*

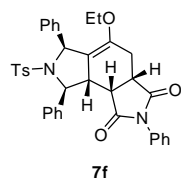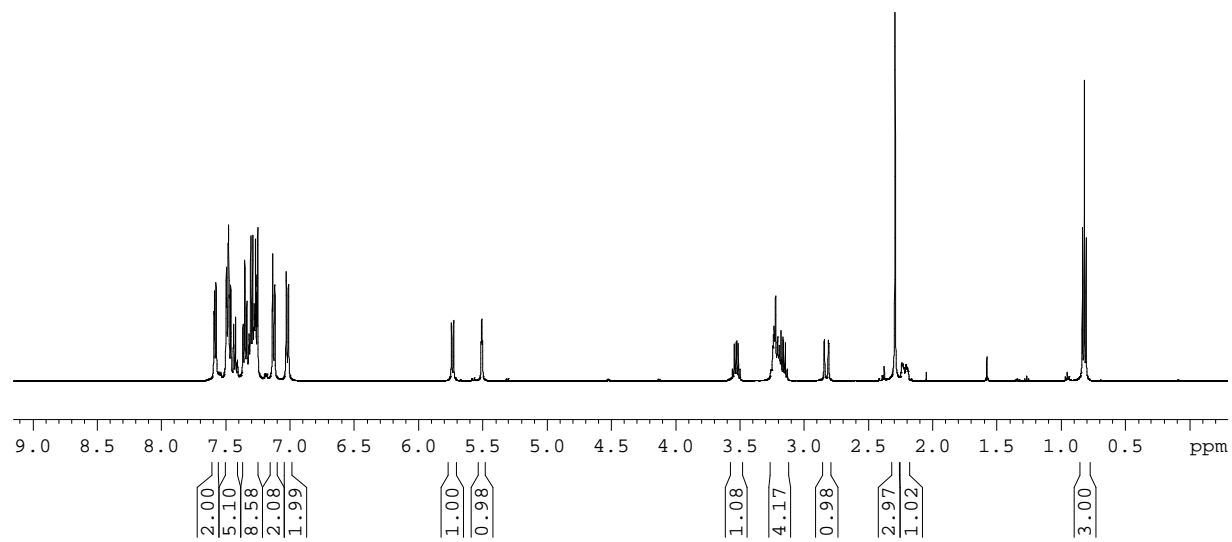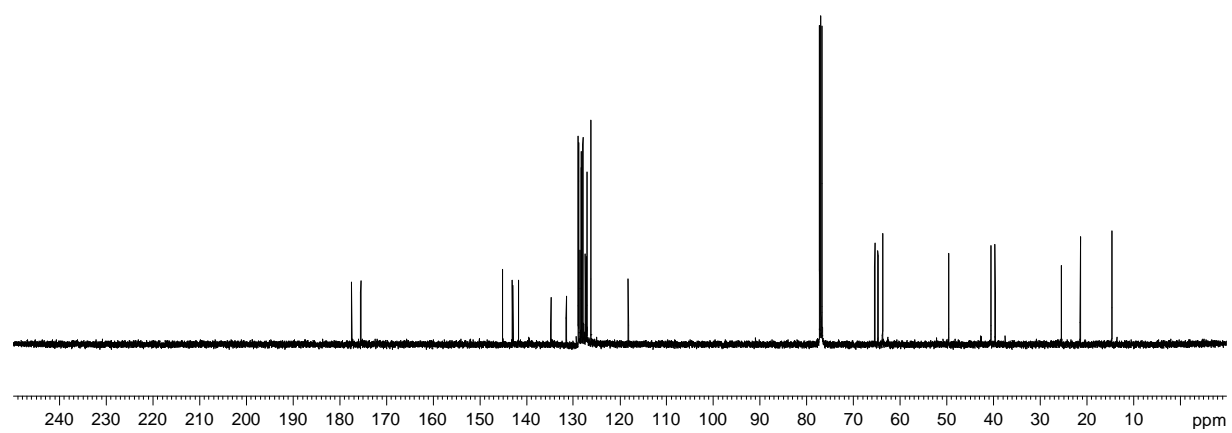

Wang *et al.*

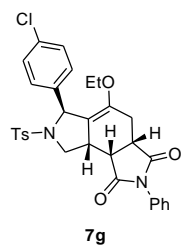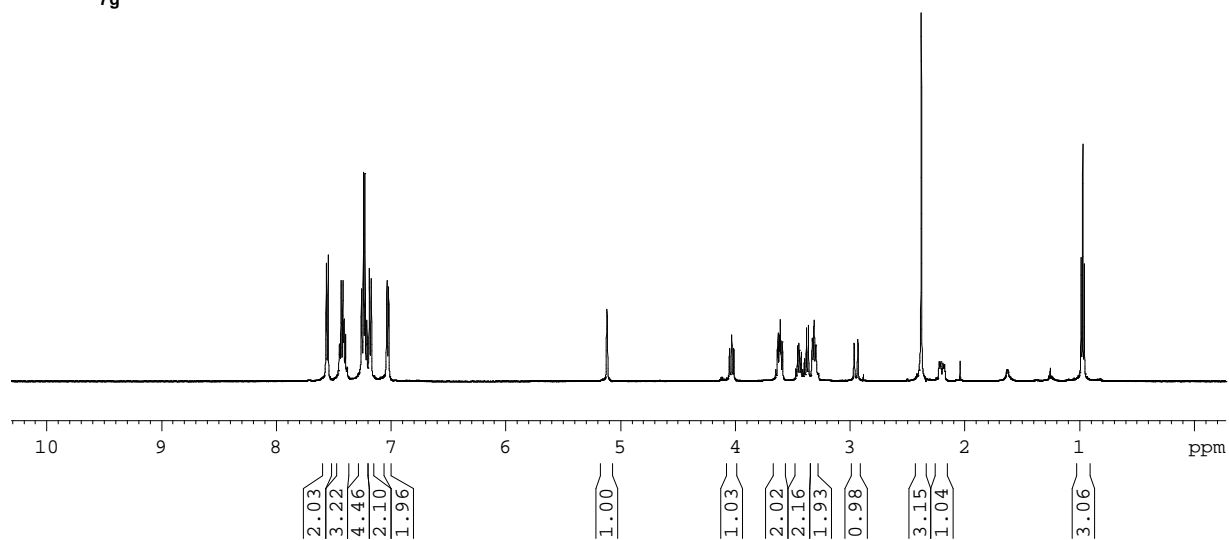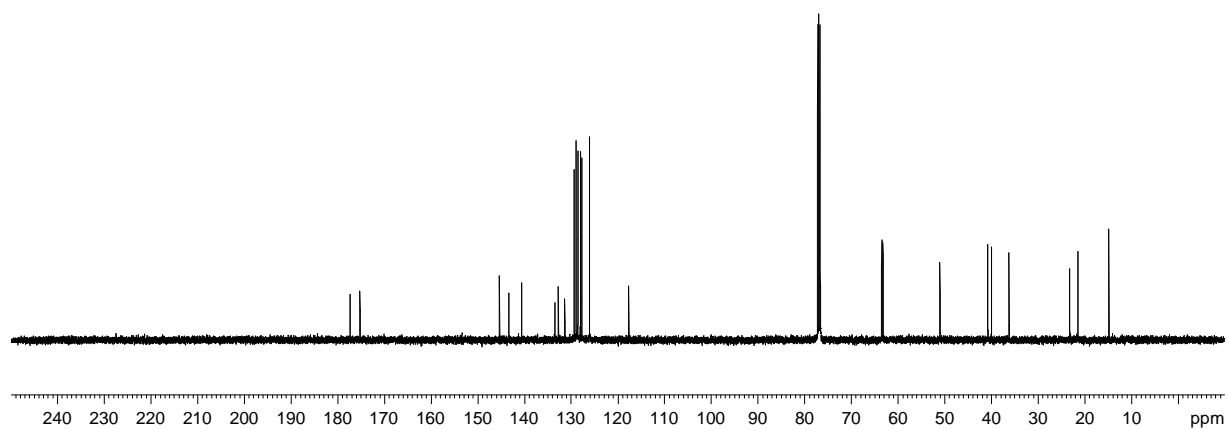

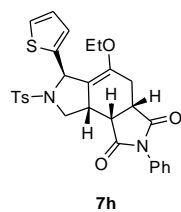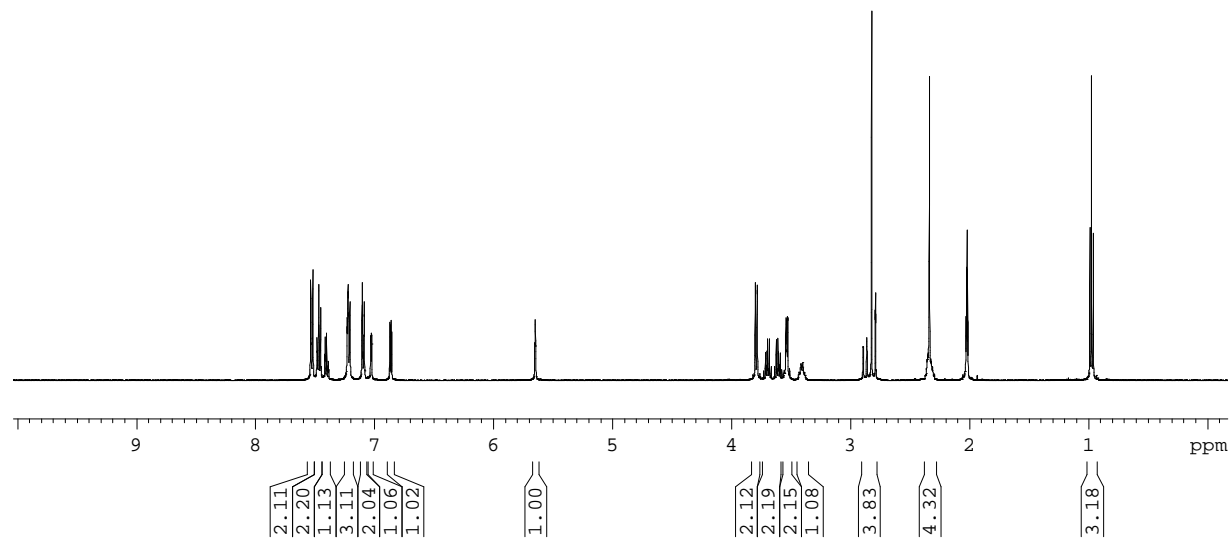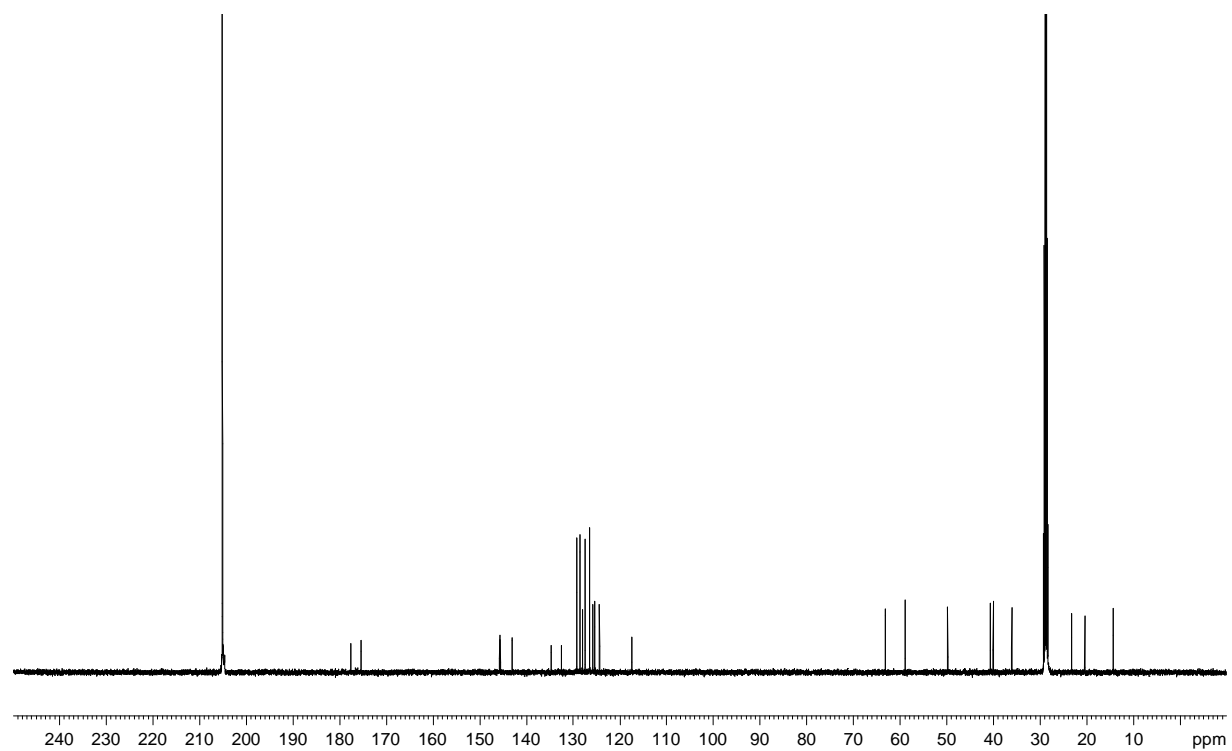



Wang *et al.*

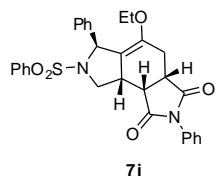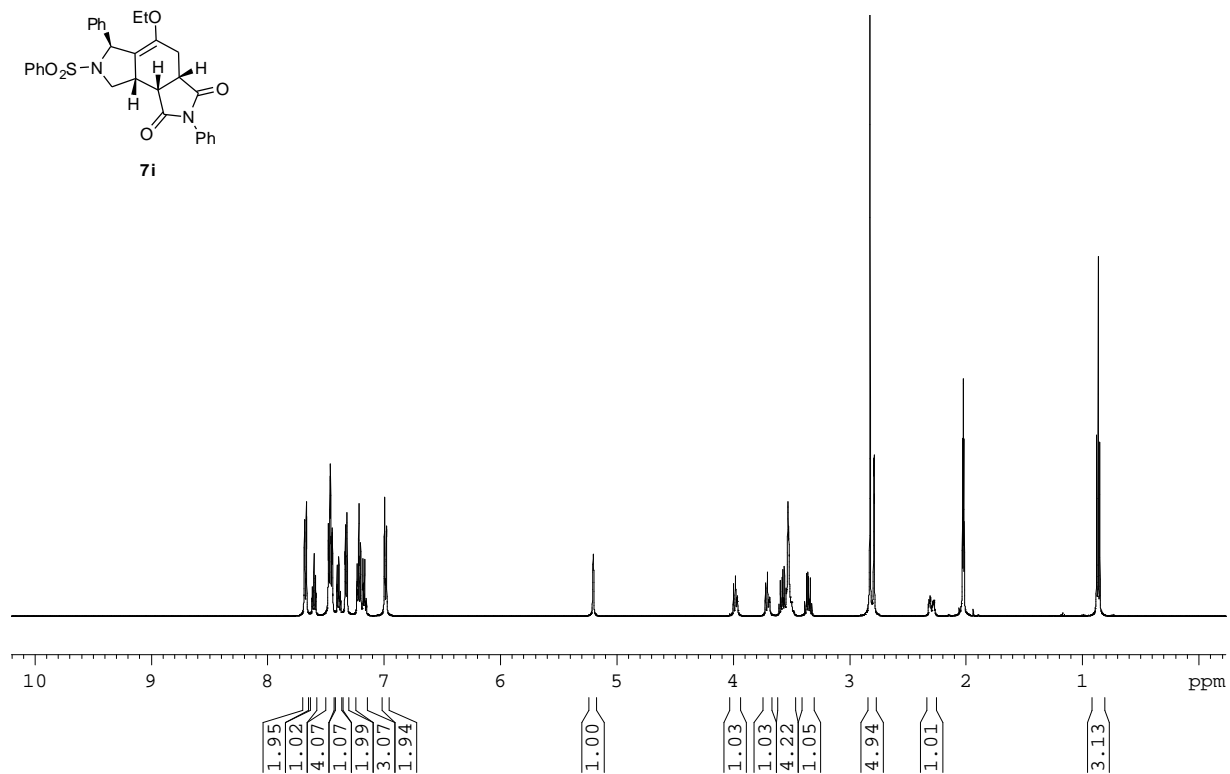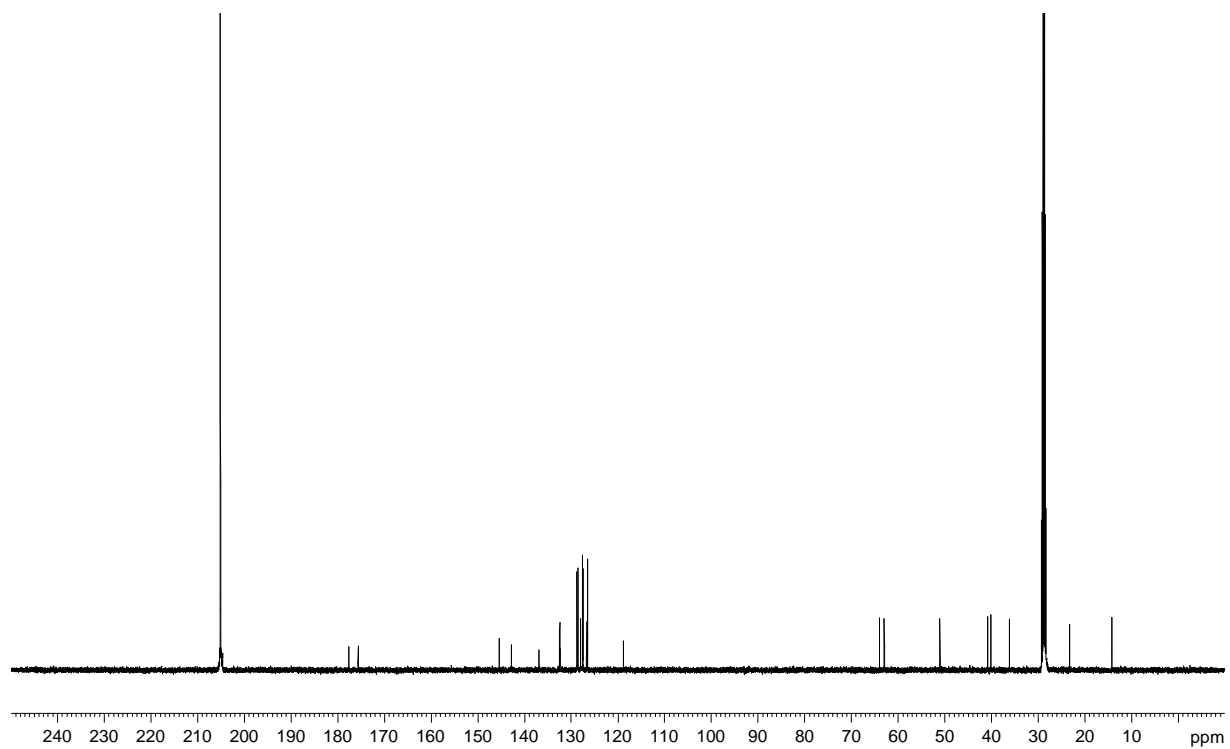

Wang *et al.*

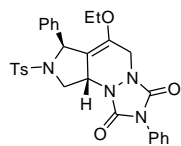

8a

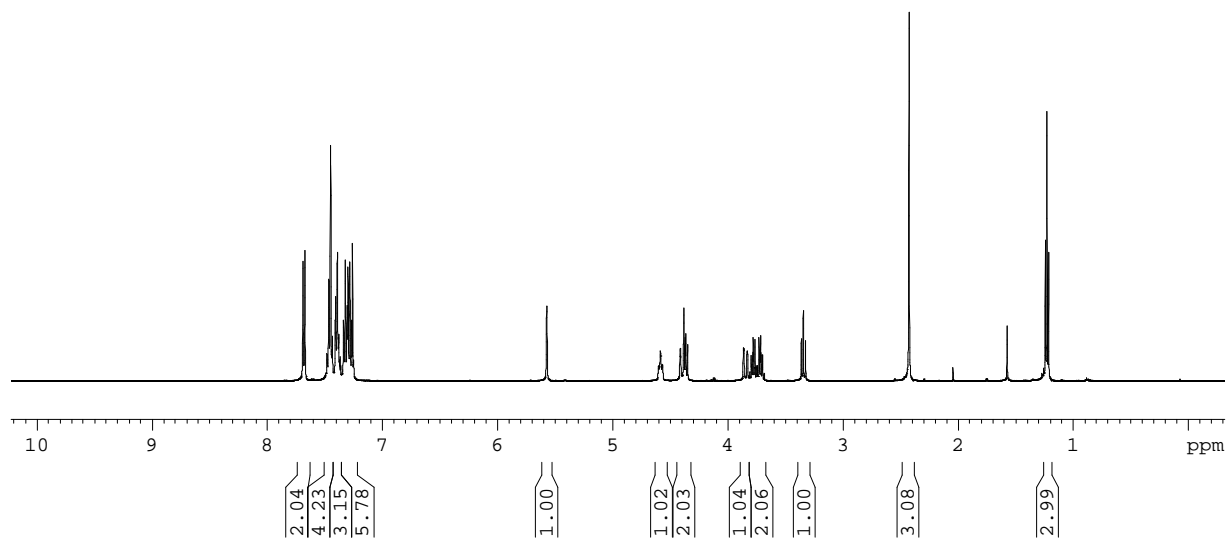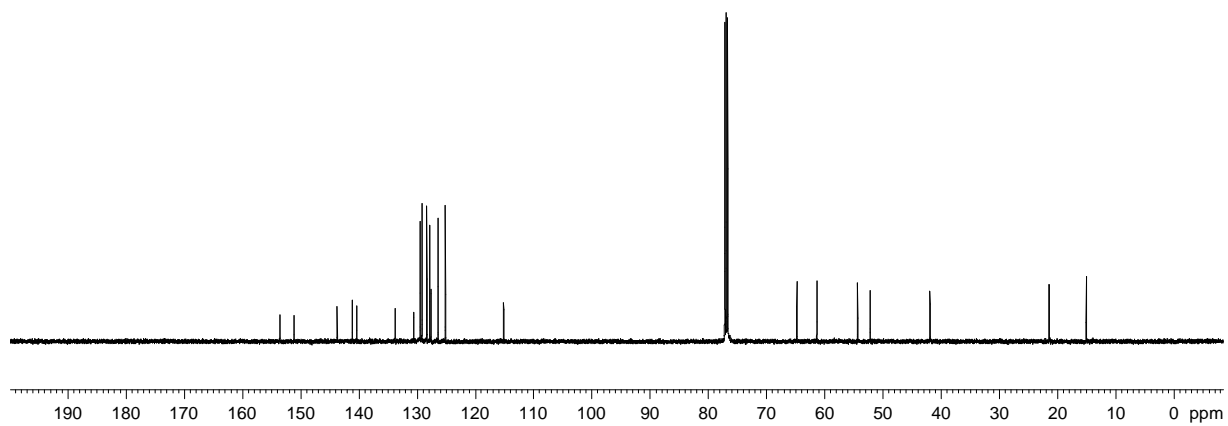

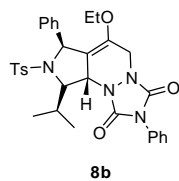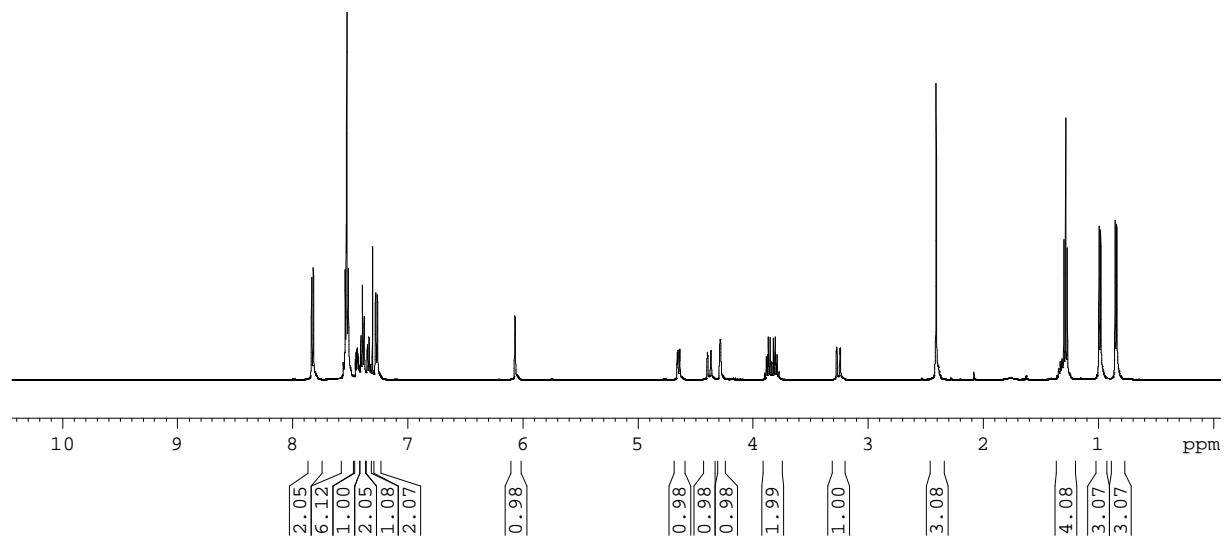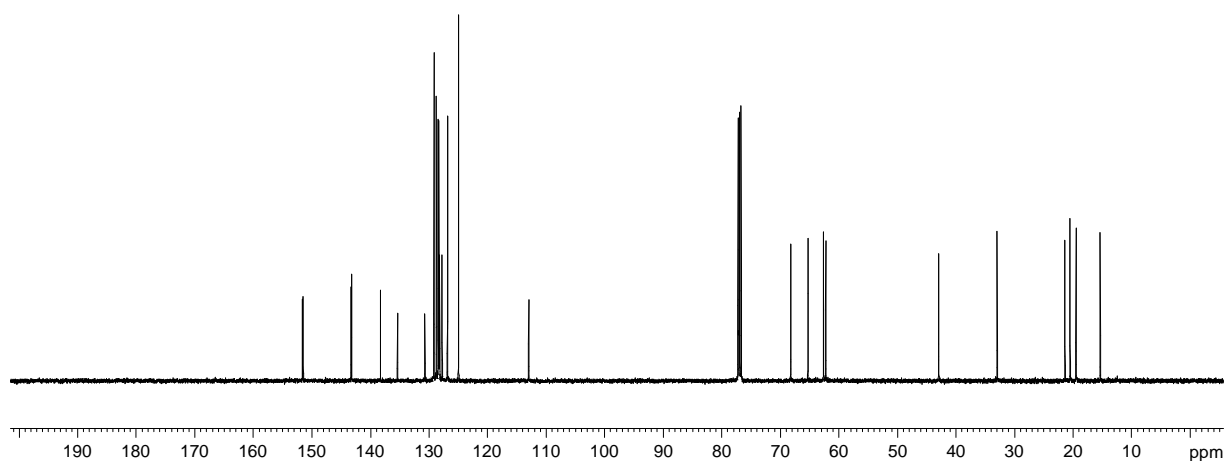

Wang *et al.*

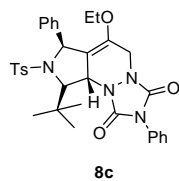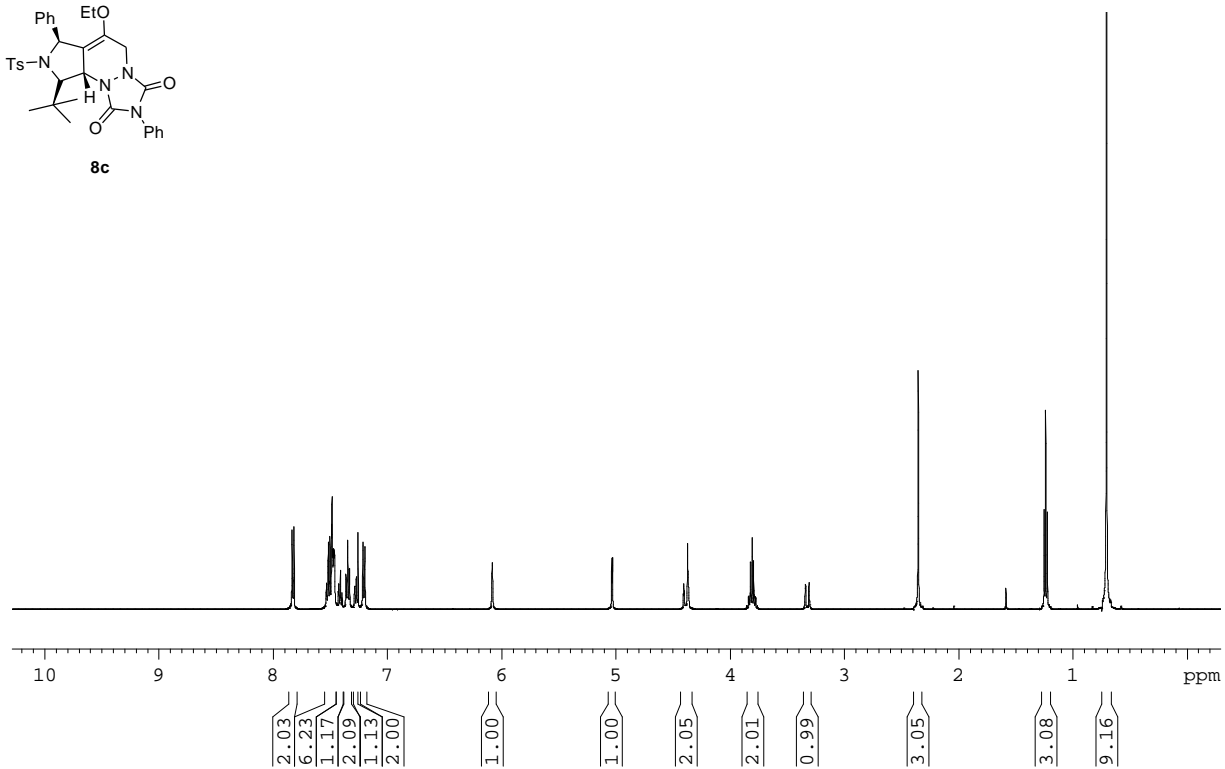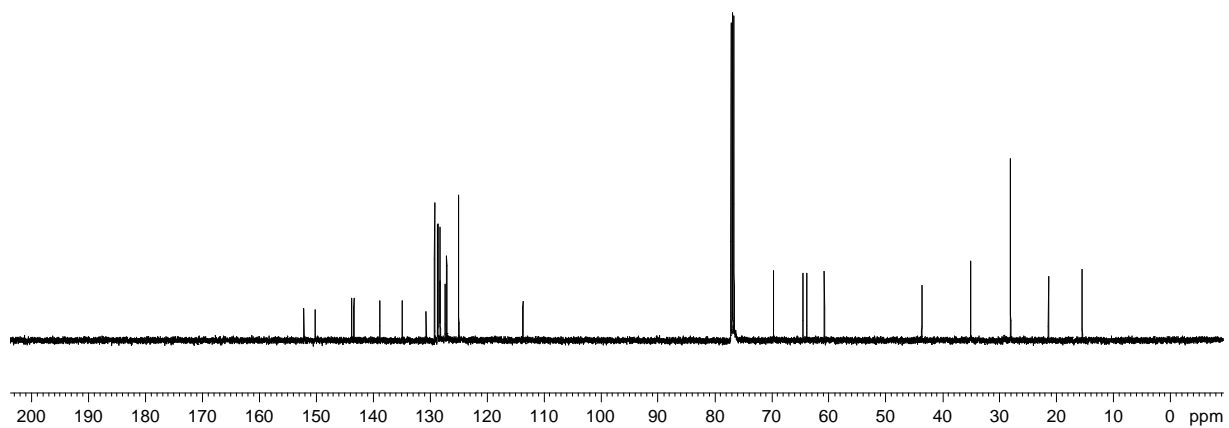

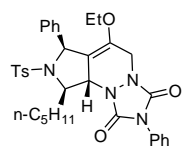

**8d**

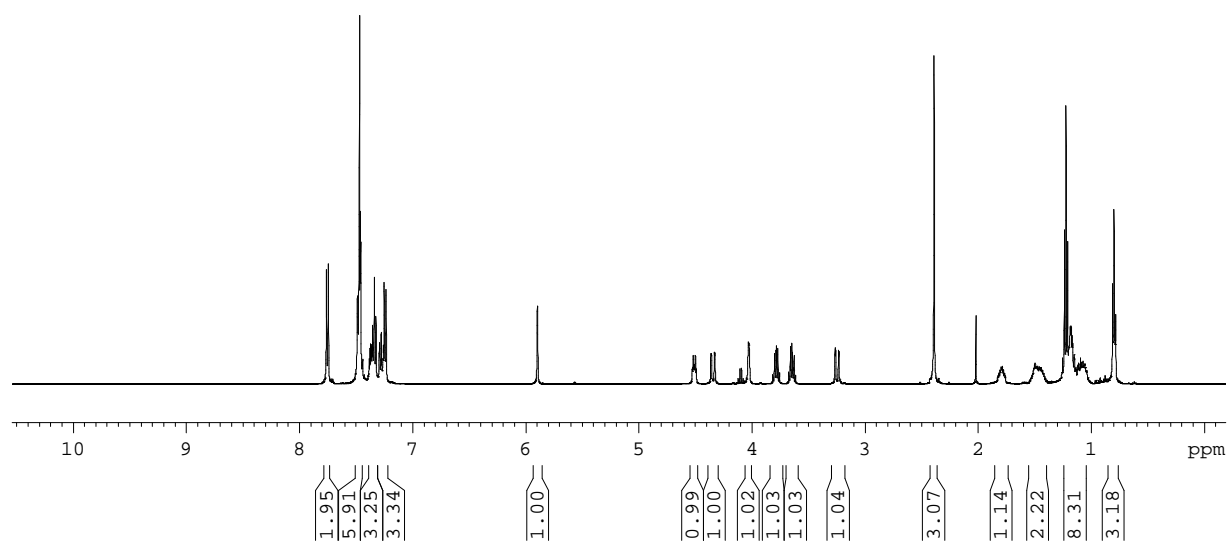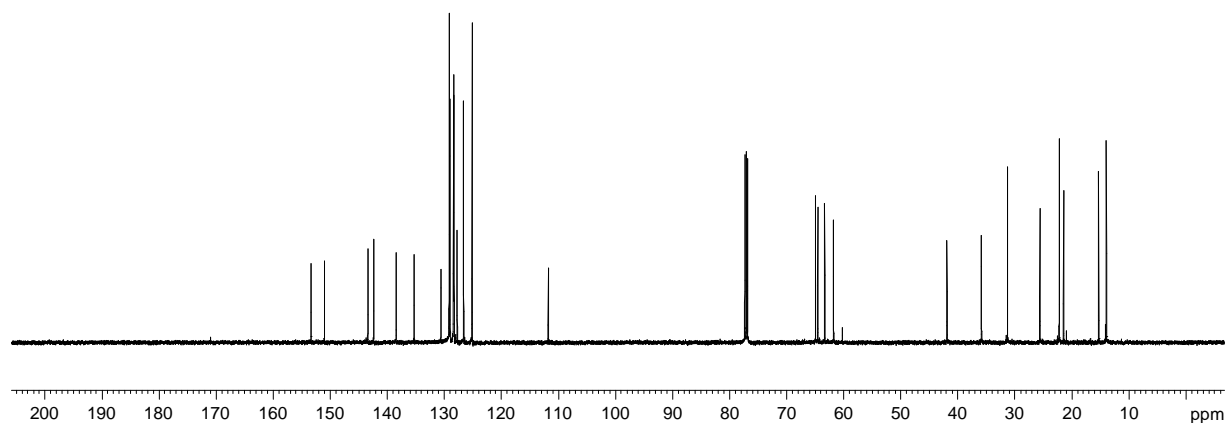

Wang *et al.*

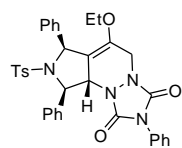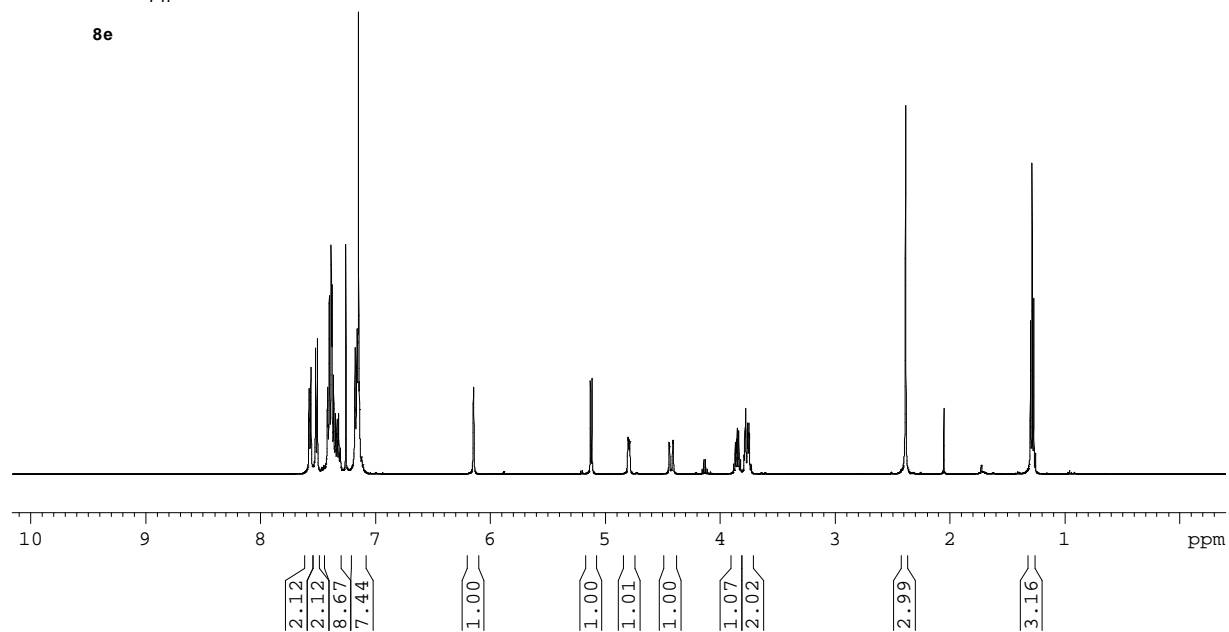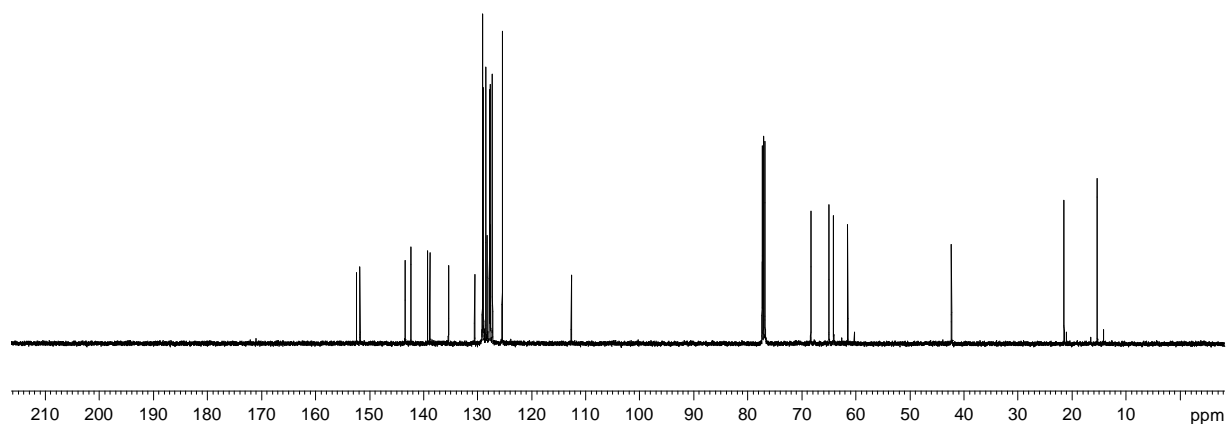

Wang *et al.*

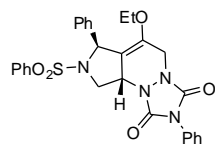

8f

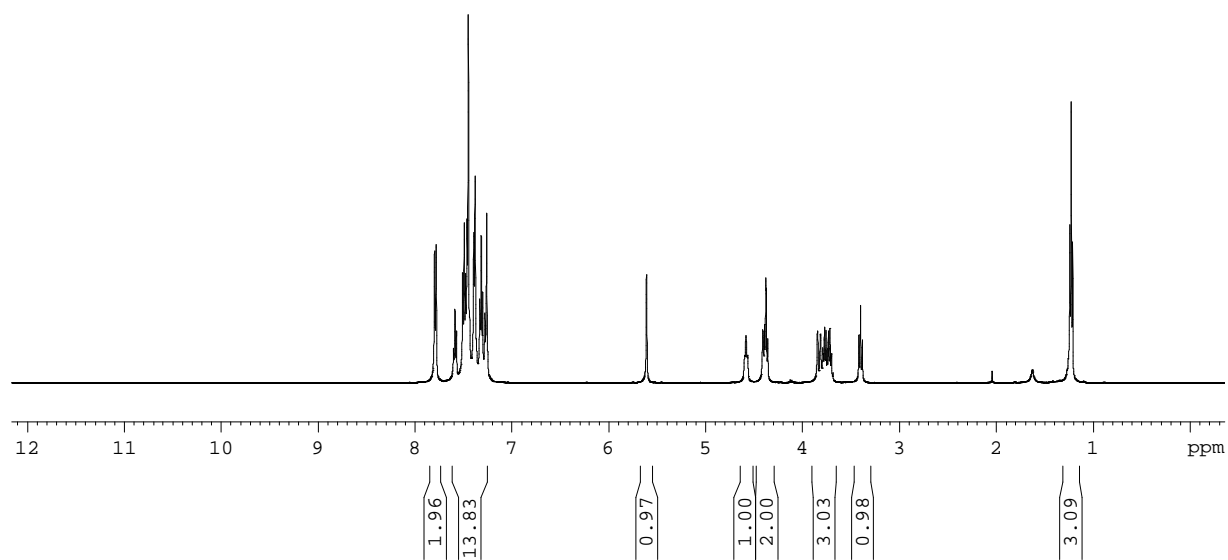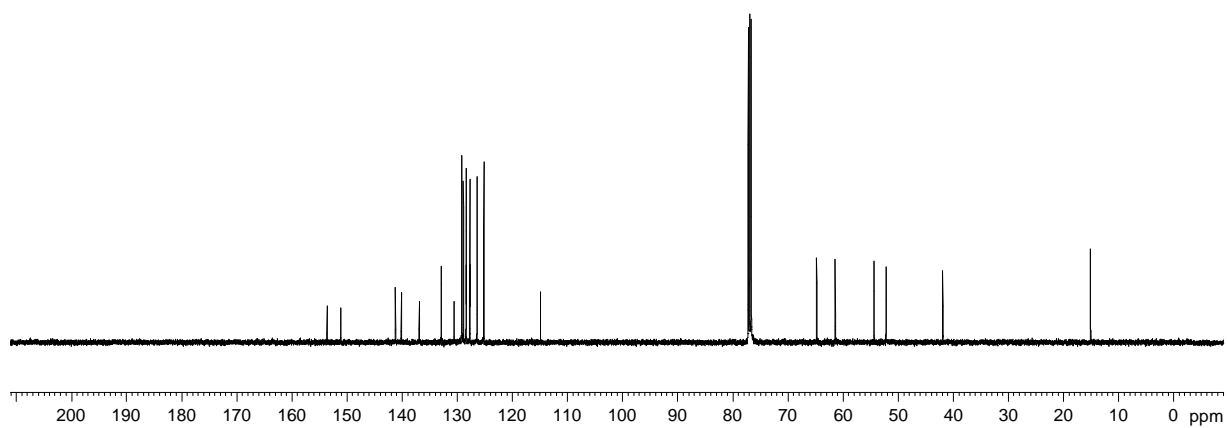

Wang *et al.*

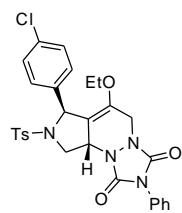

**8g**

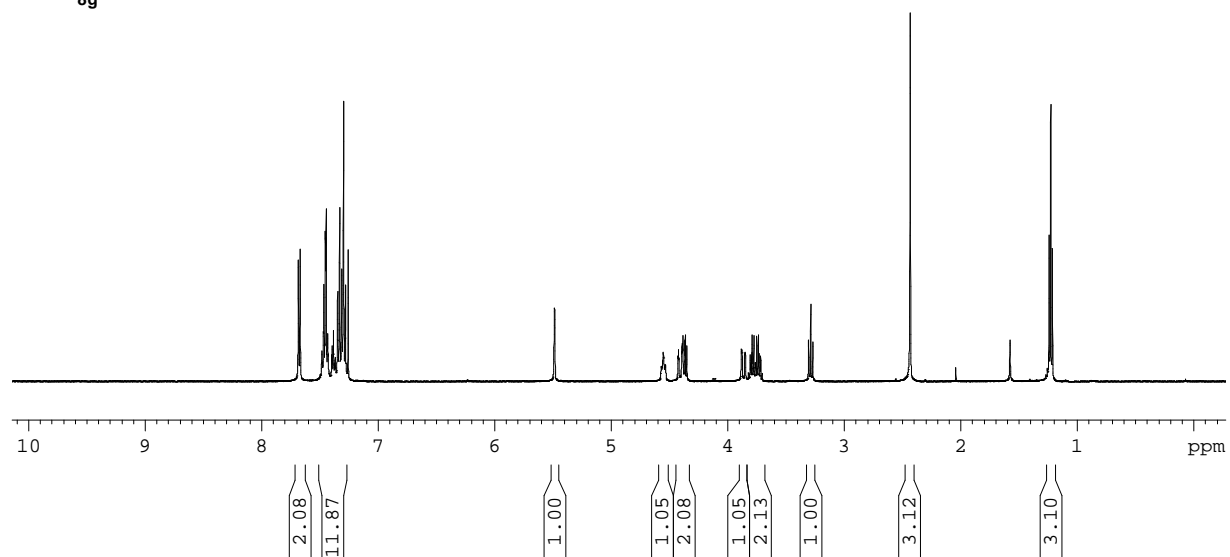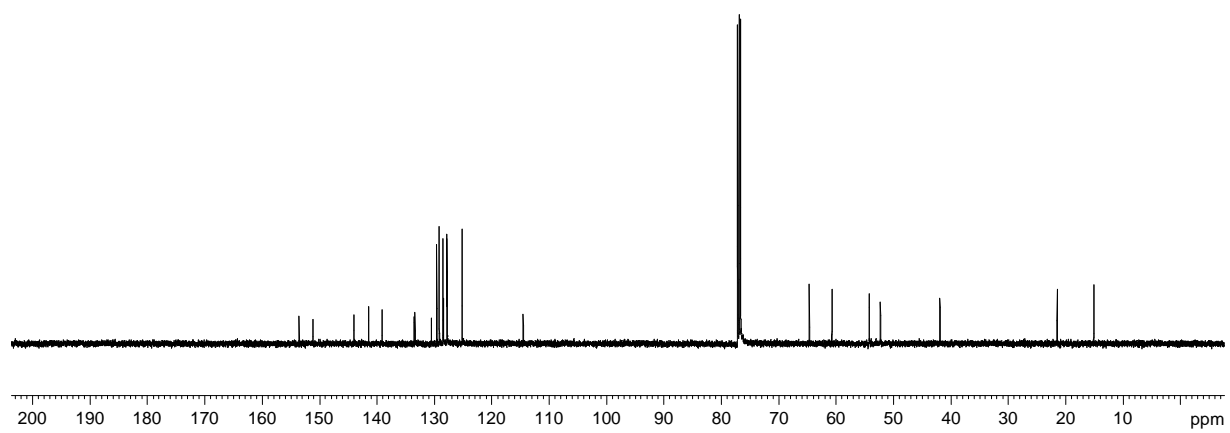



Wang *et al.*

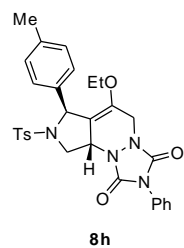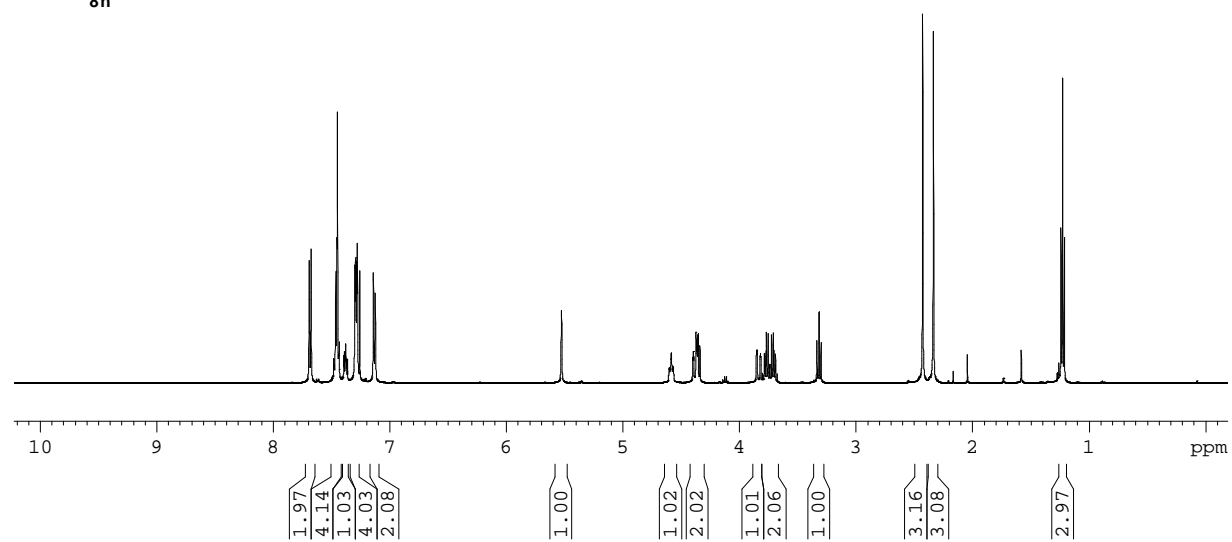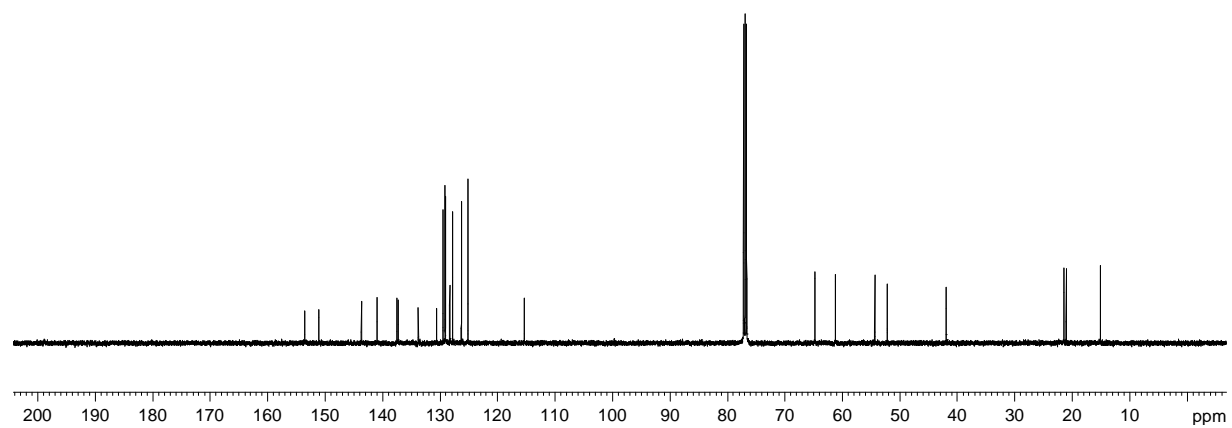

Wang *et al.*

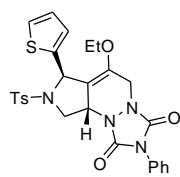

8i

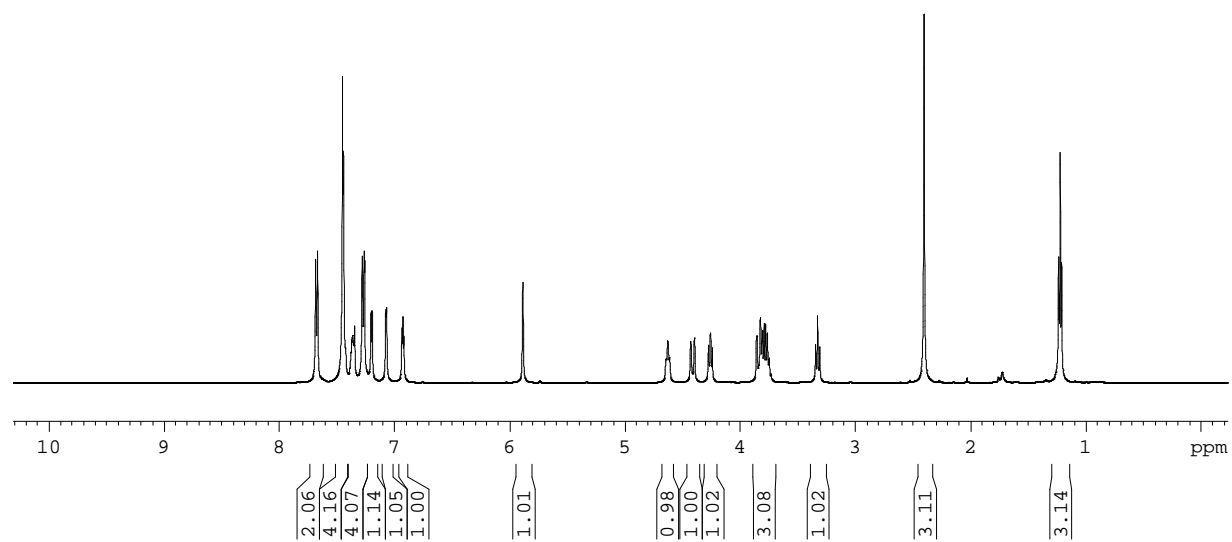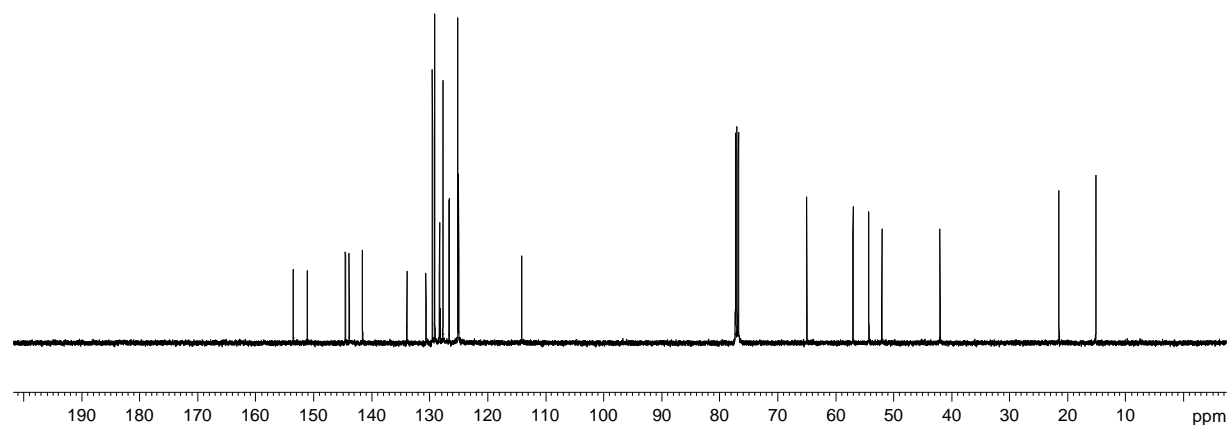

S81

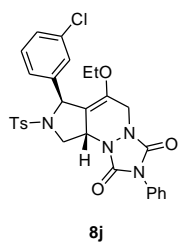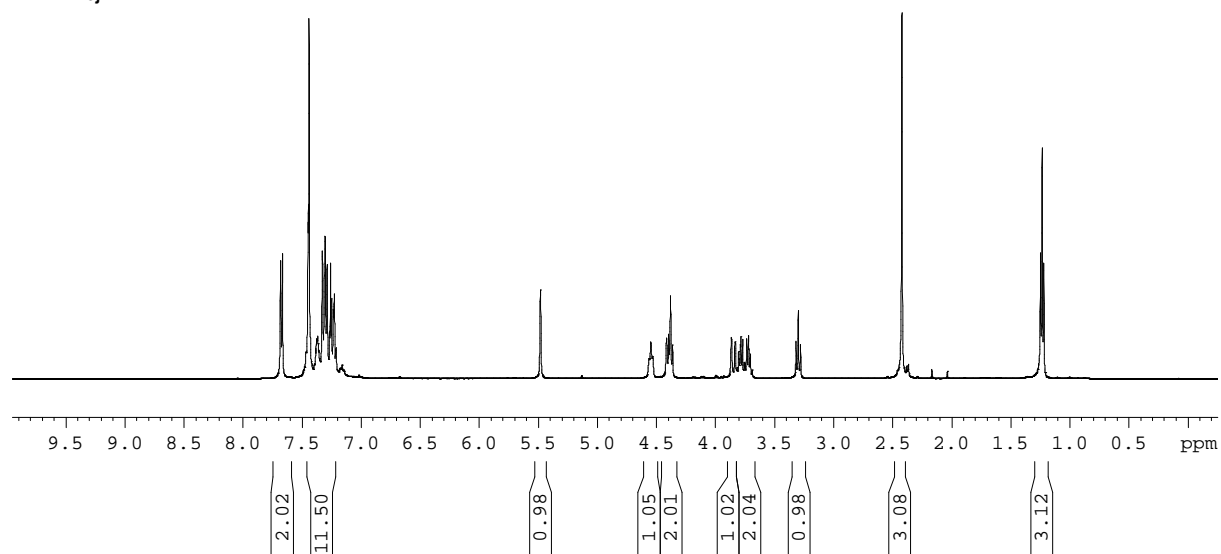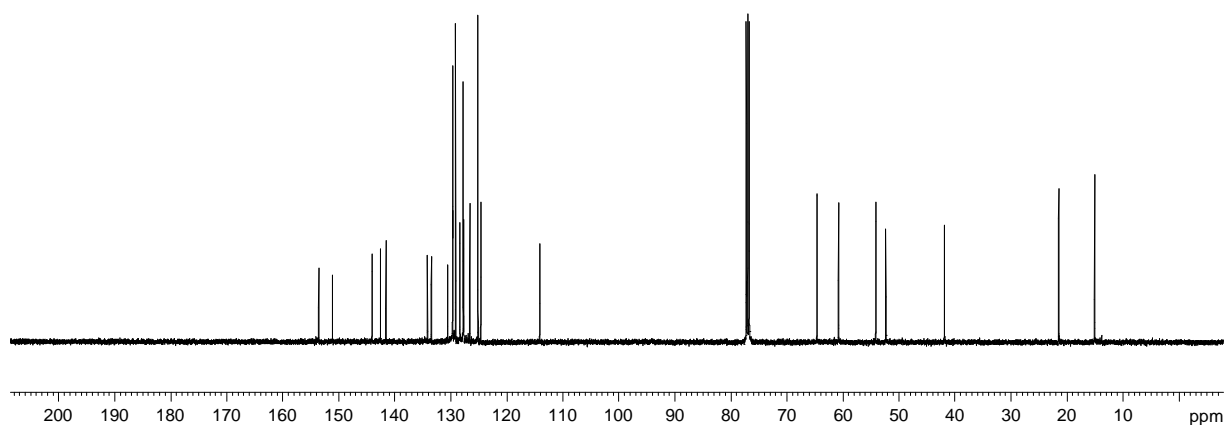

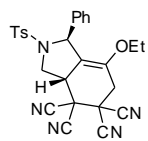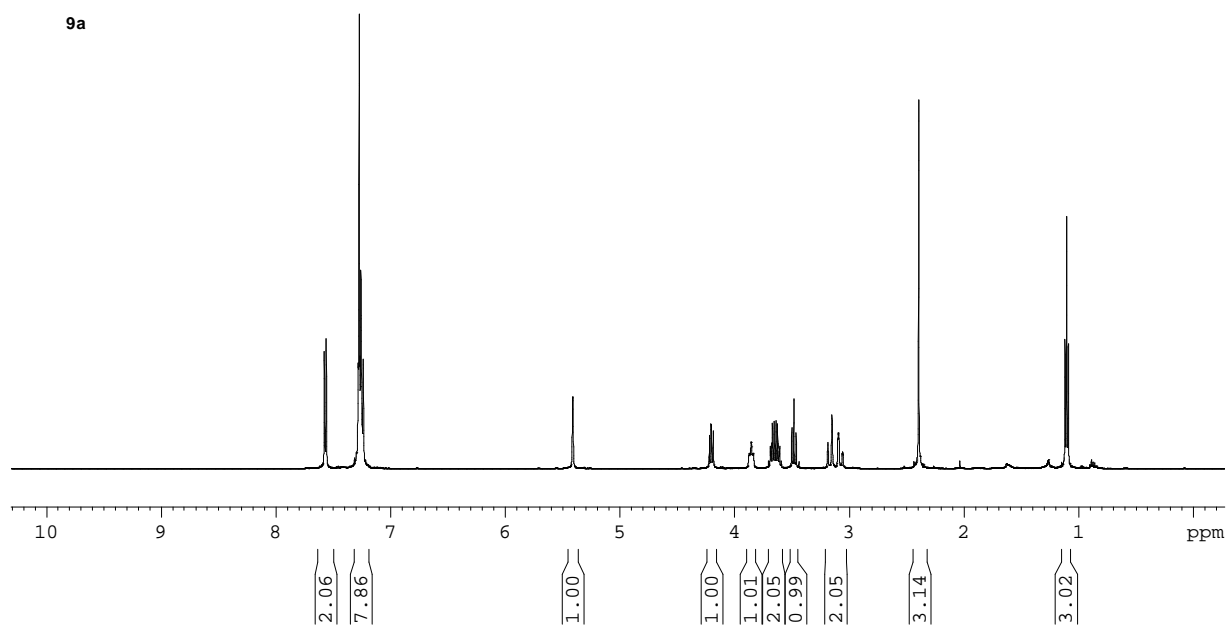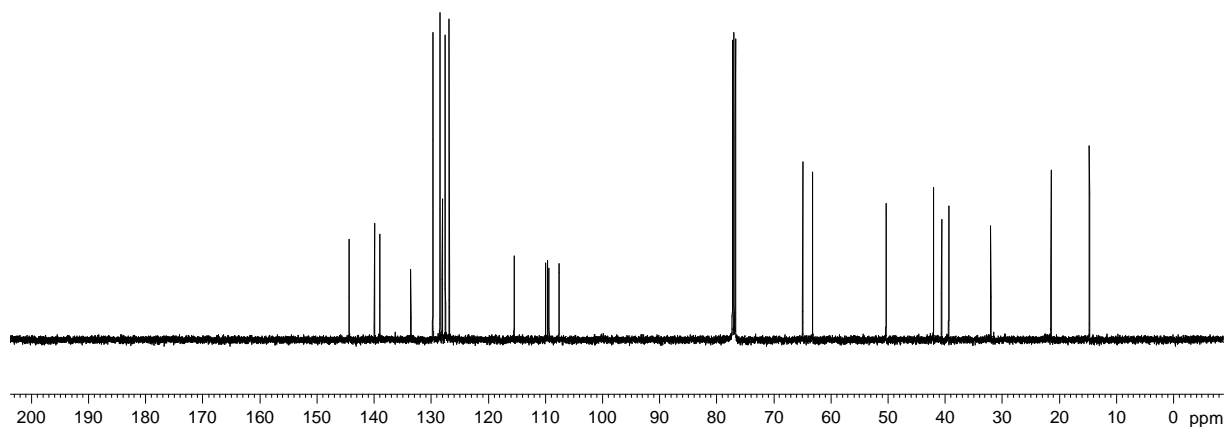

Wang *et al.*

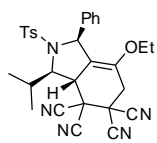

**9b**

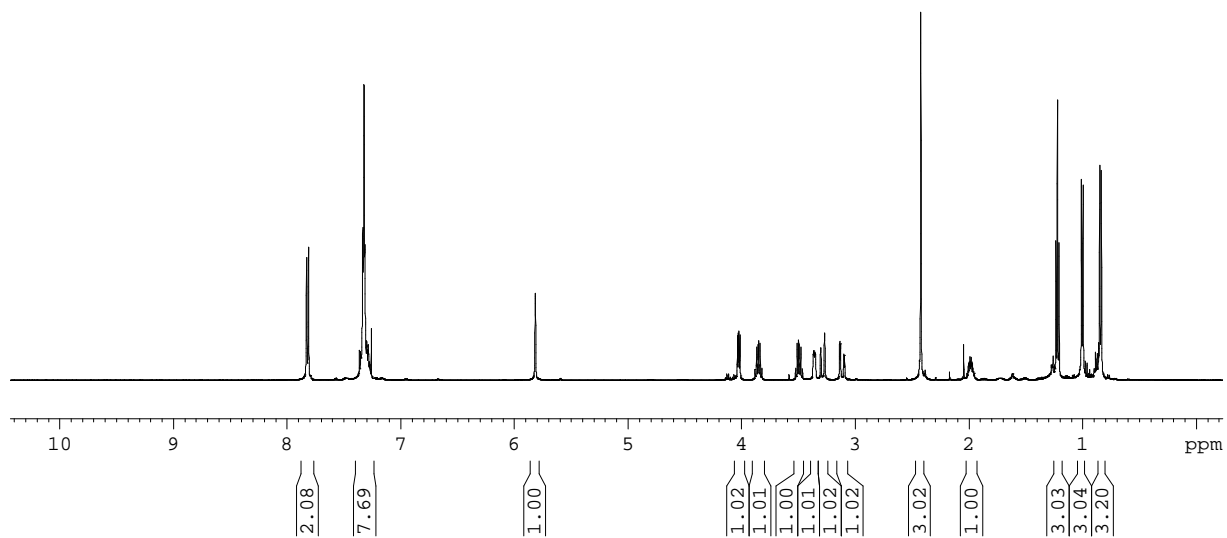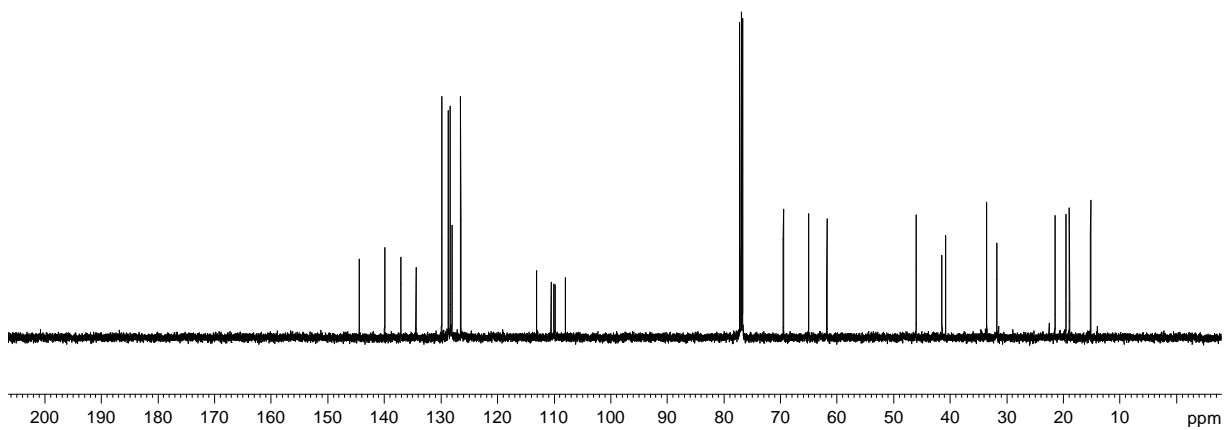

Wang *et al.*

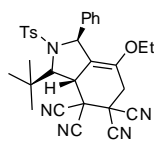

**9c**

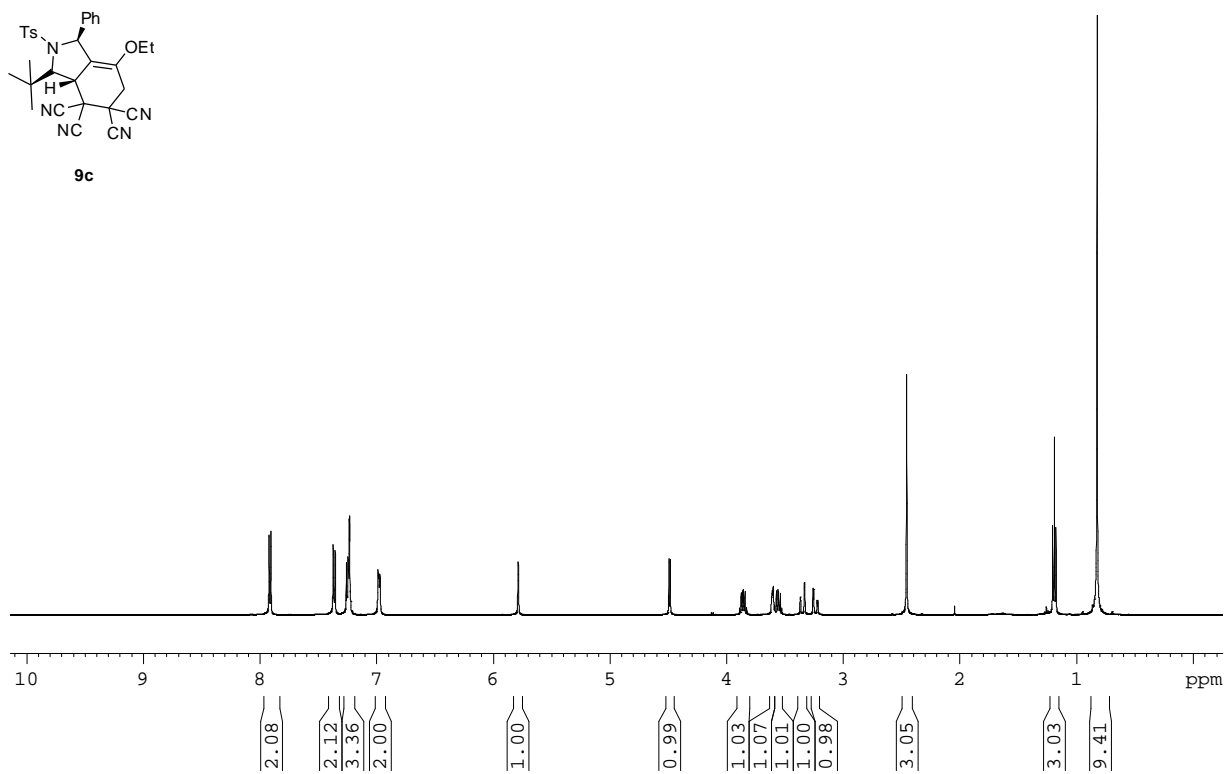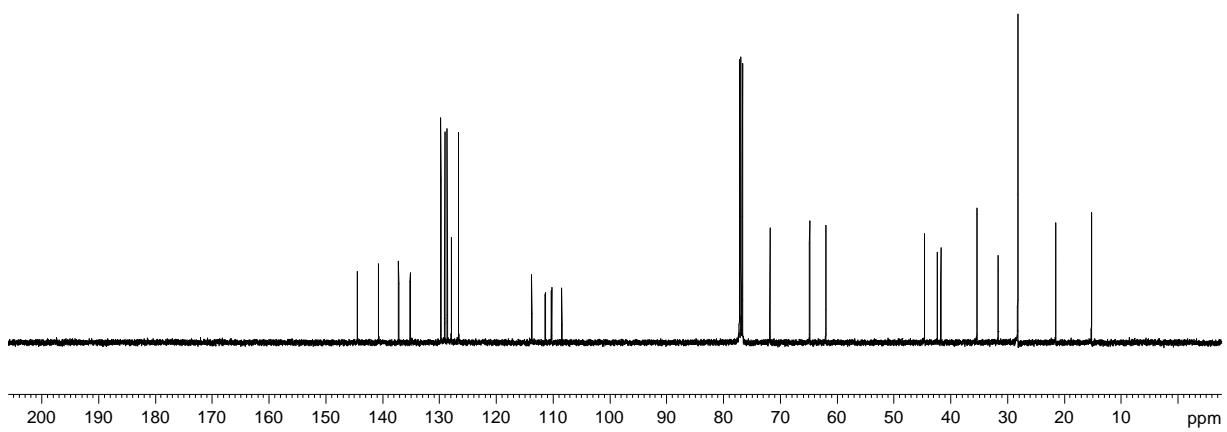

Wang *et al.*

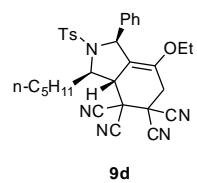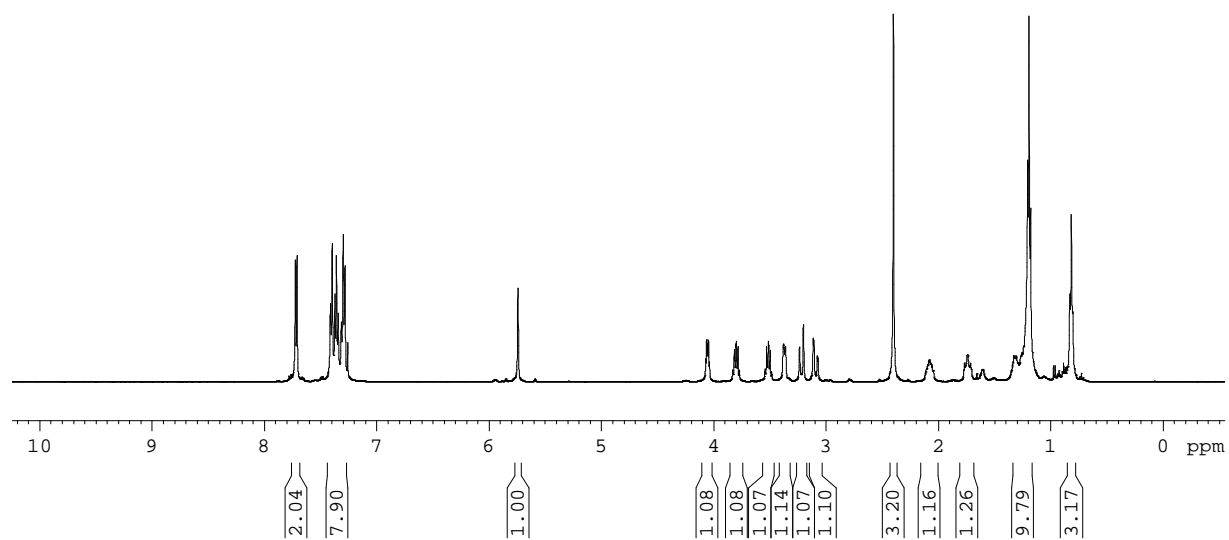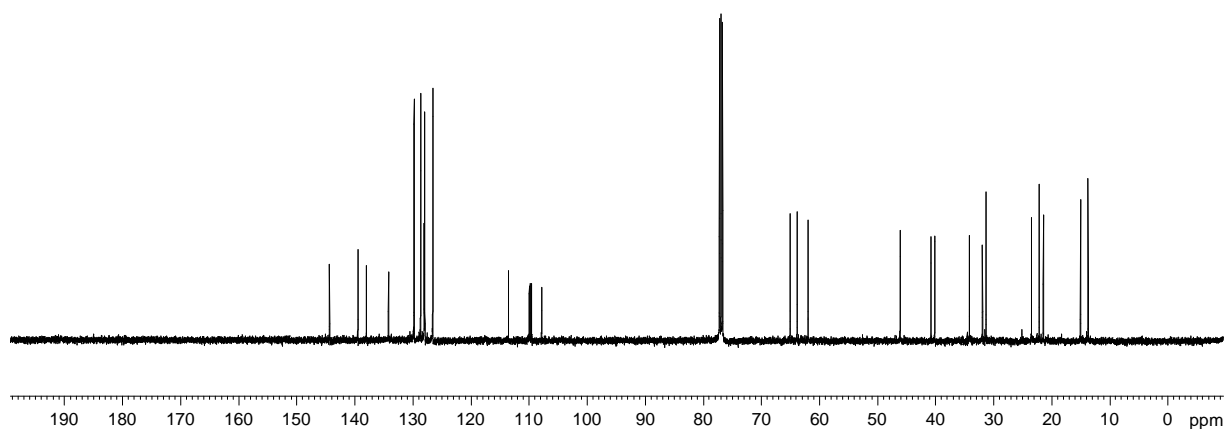

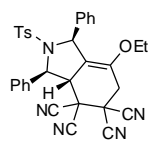

9e

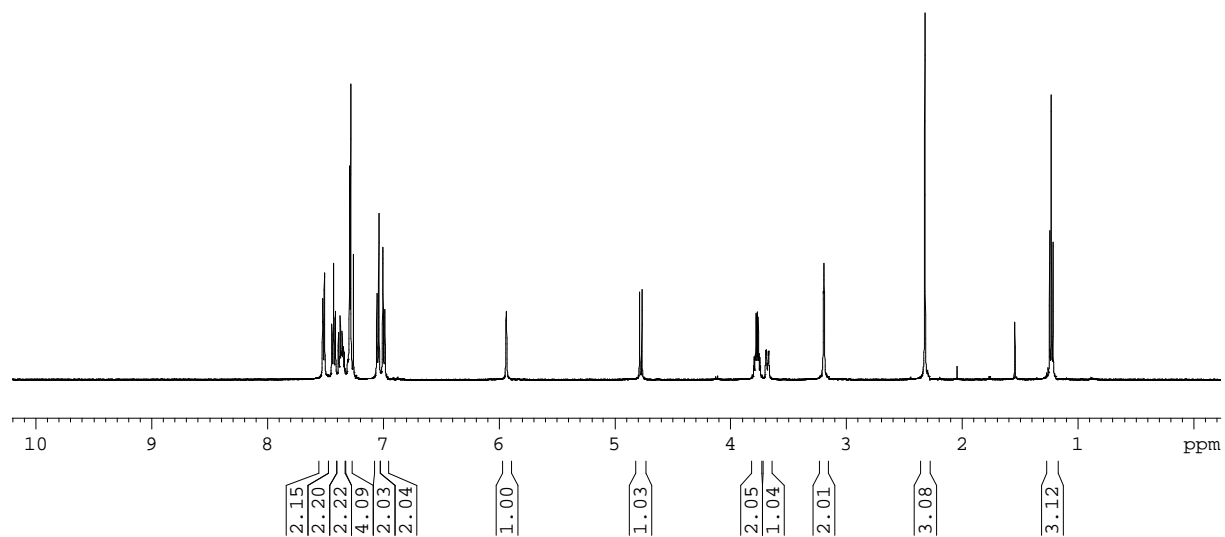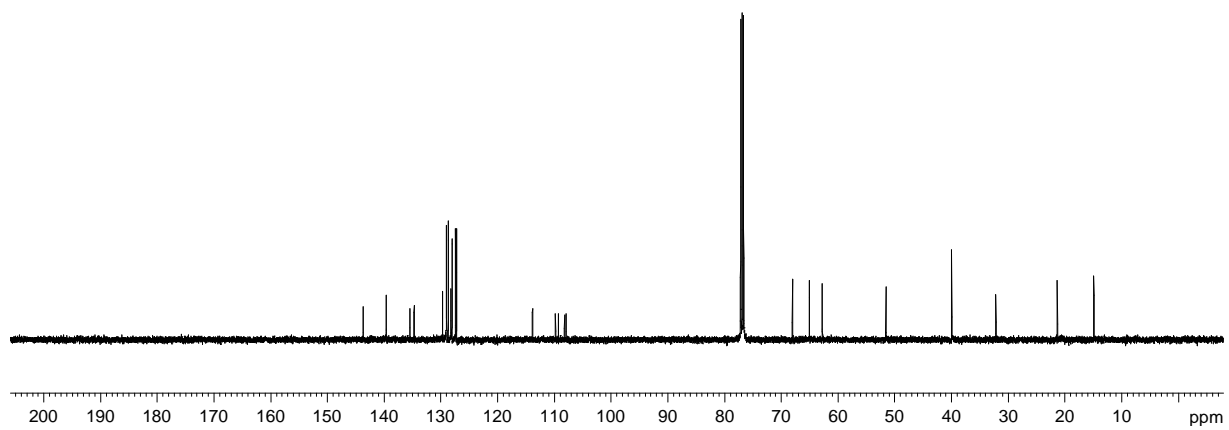



Wang *et al.*

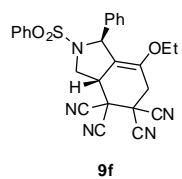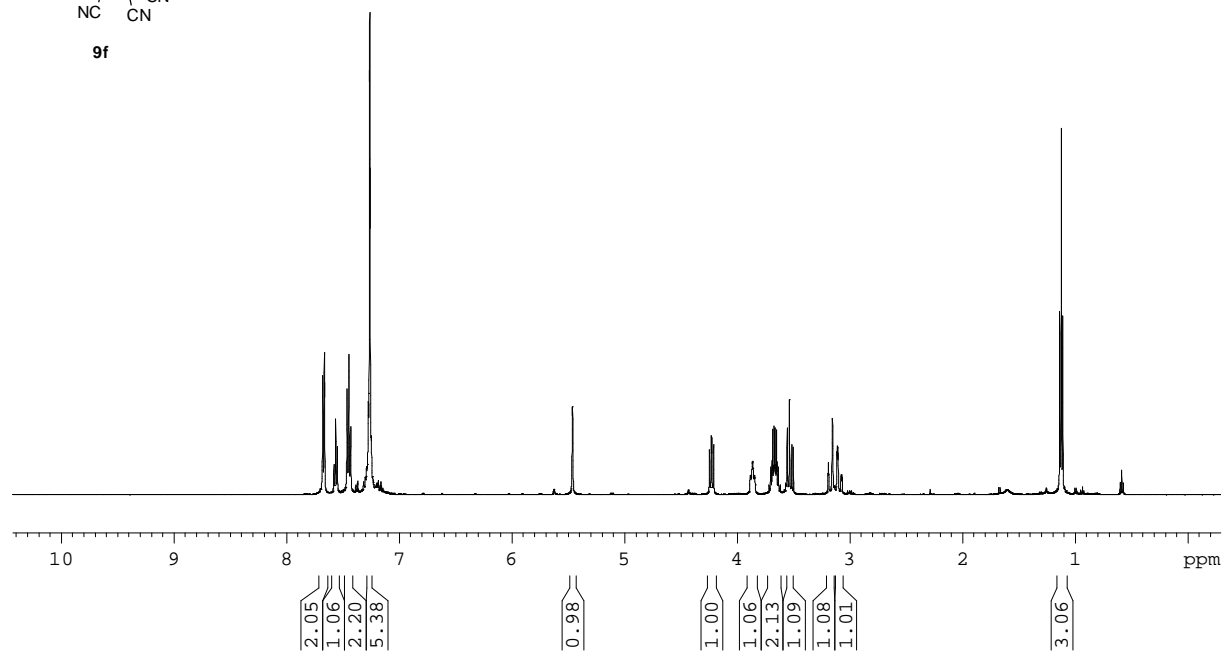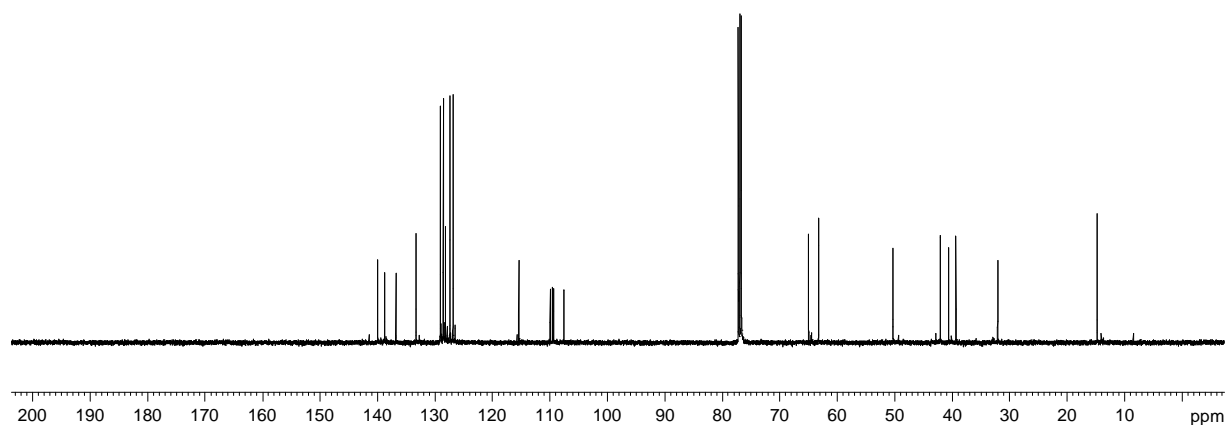

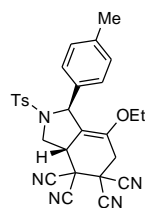

9g

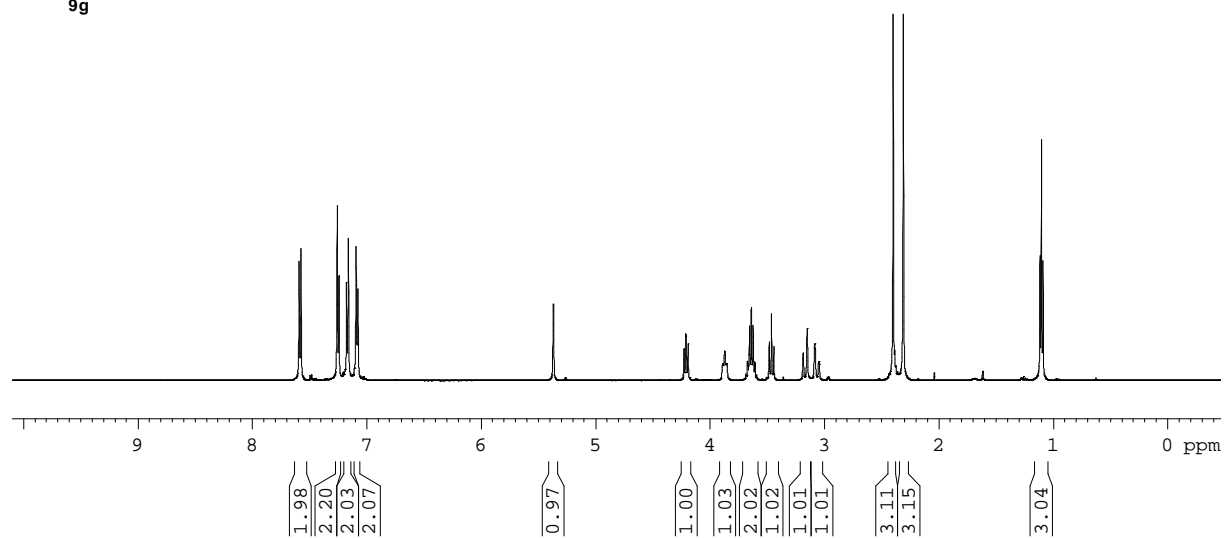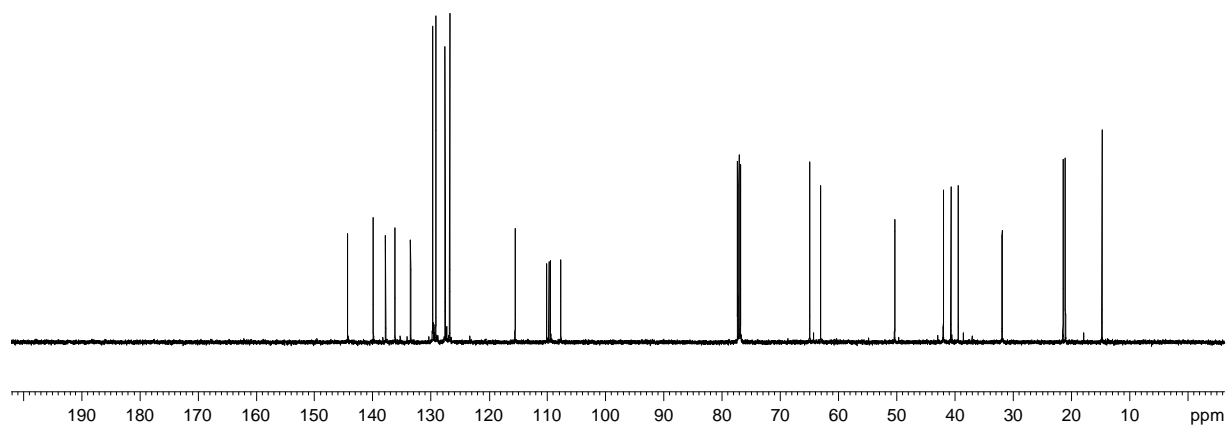

Wang *et al.*

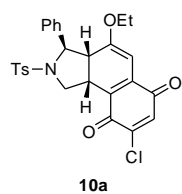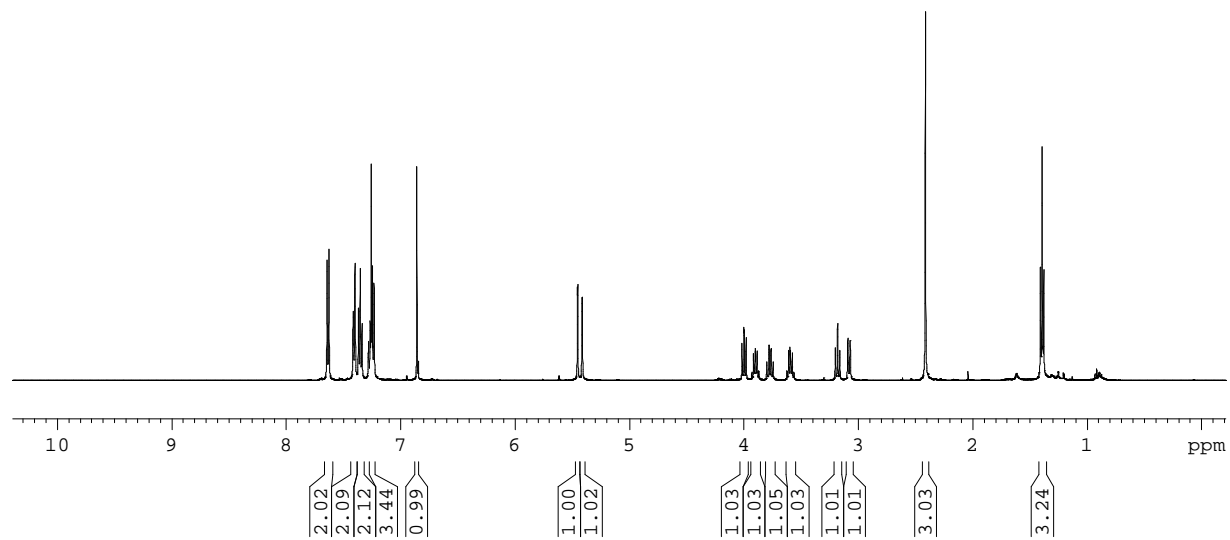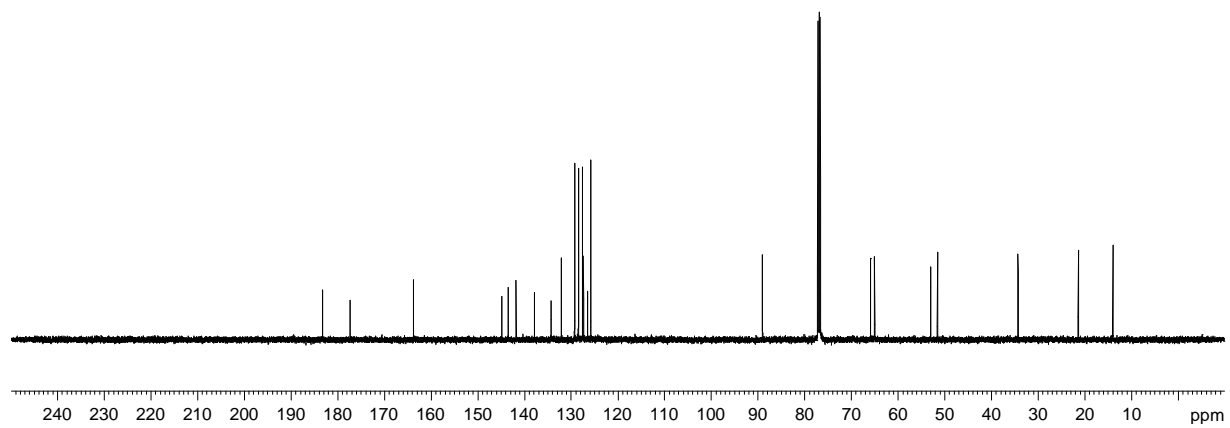

Wang *et al.*

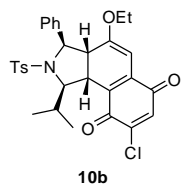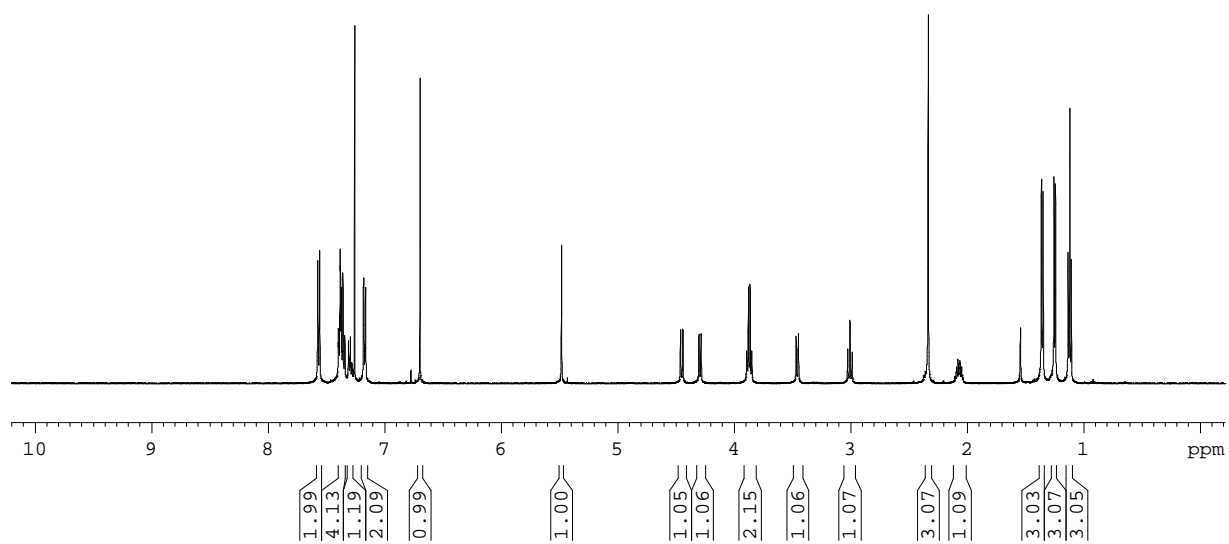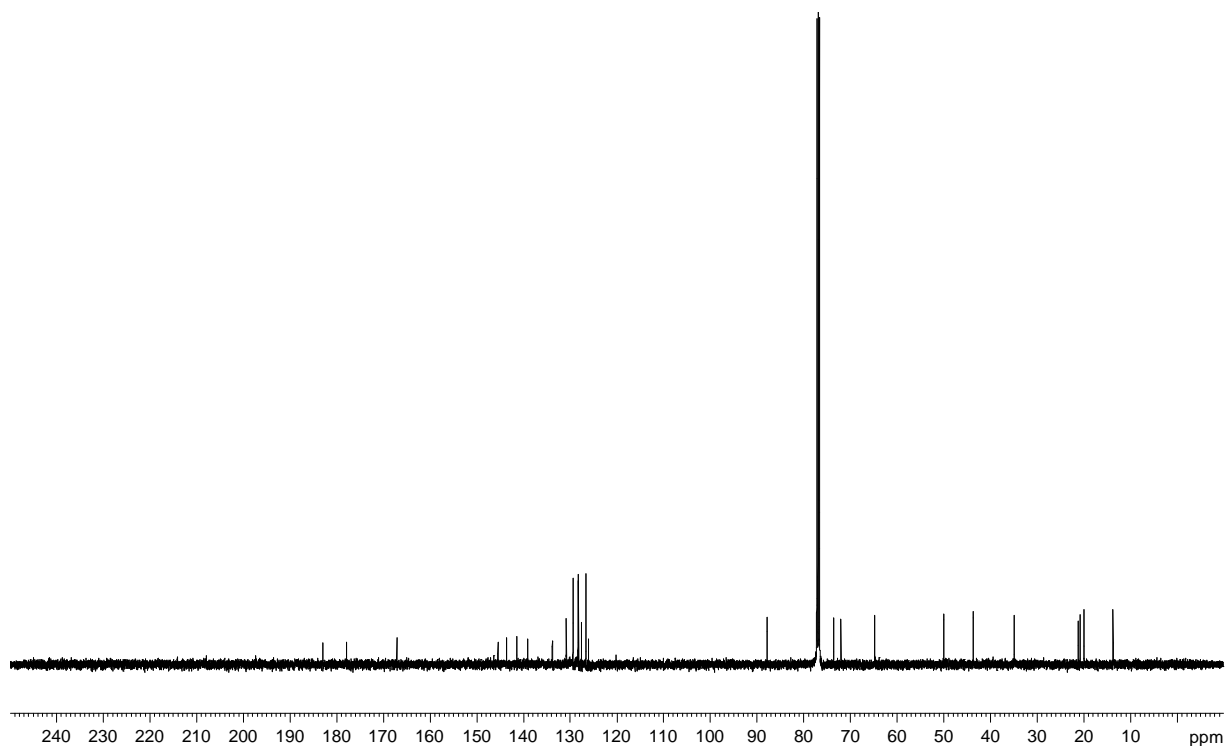

Wang *et al.*

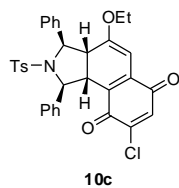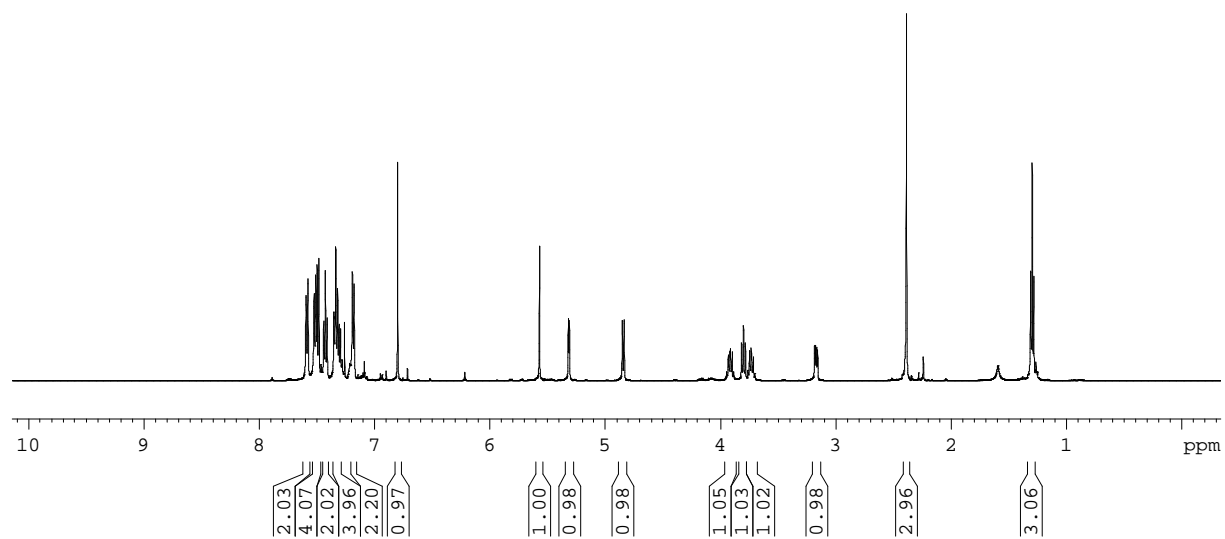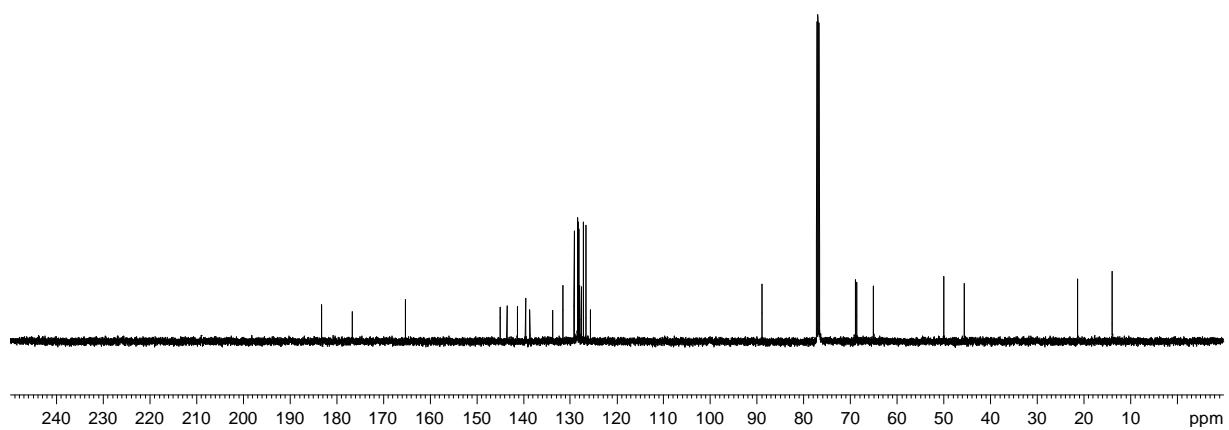

Wang *et al.*

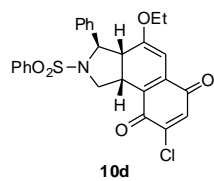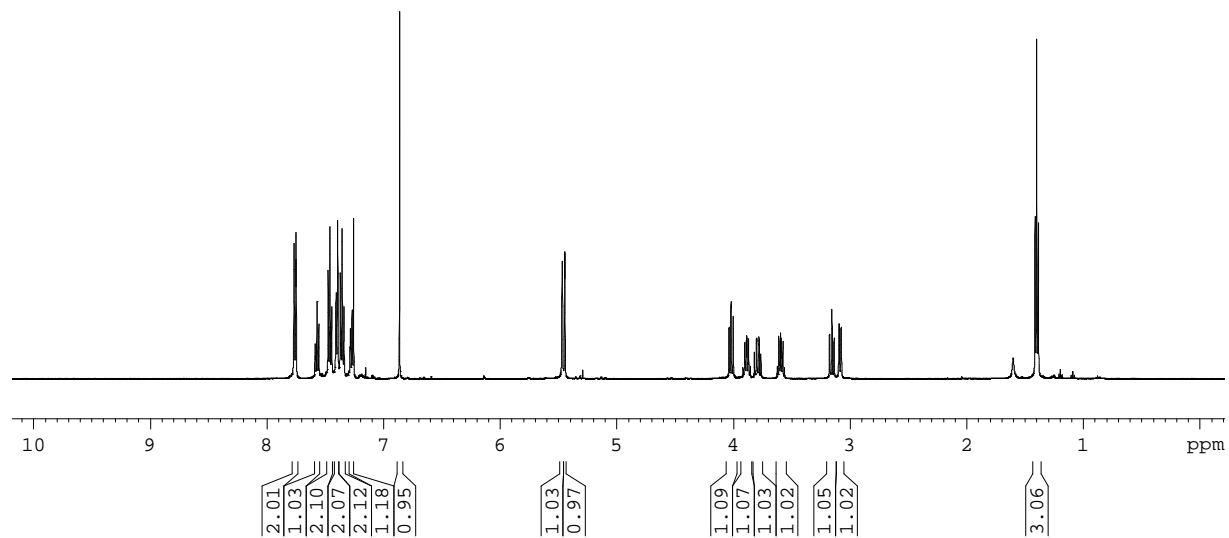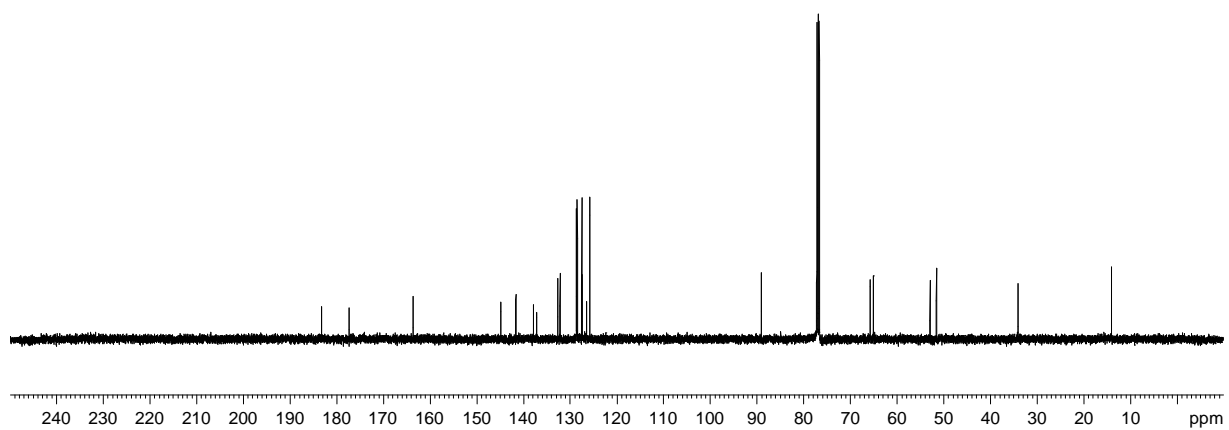

Wang *et al.*

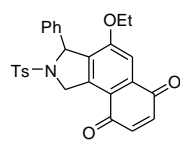

10e

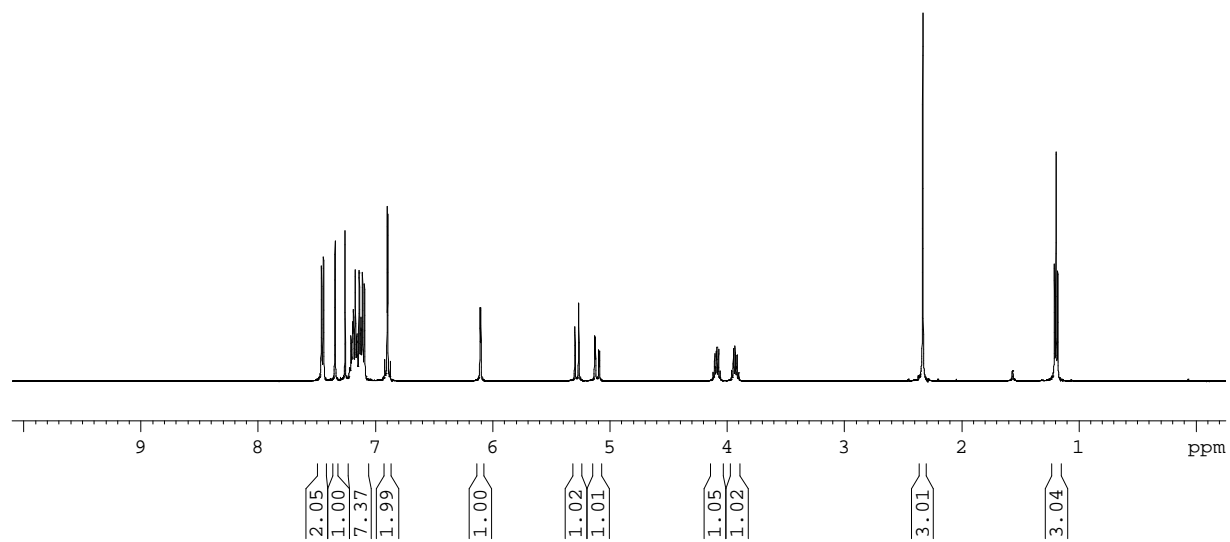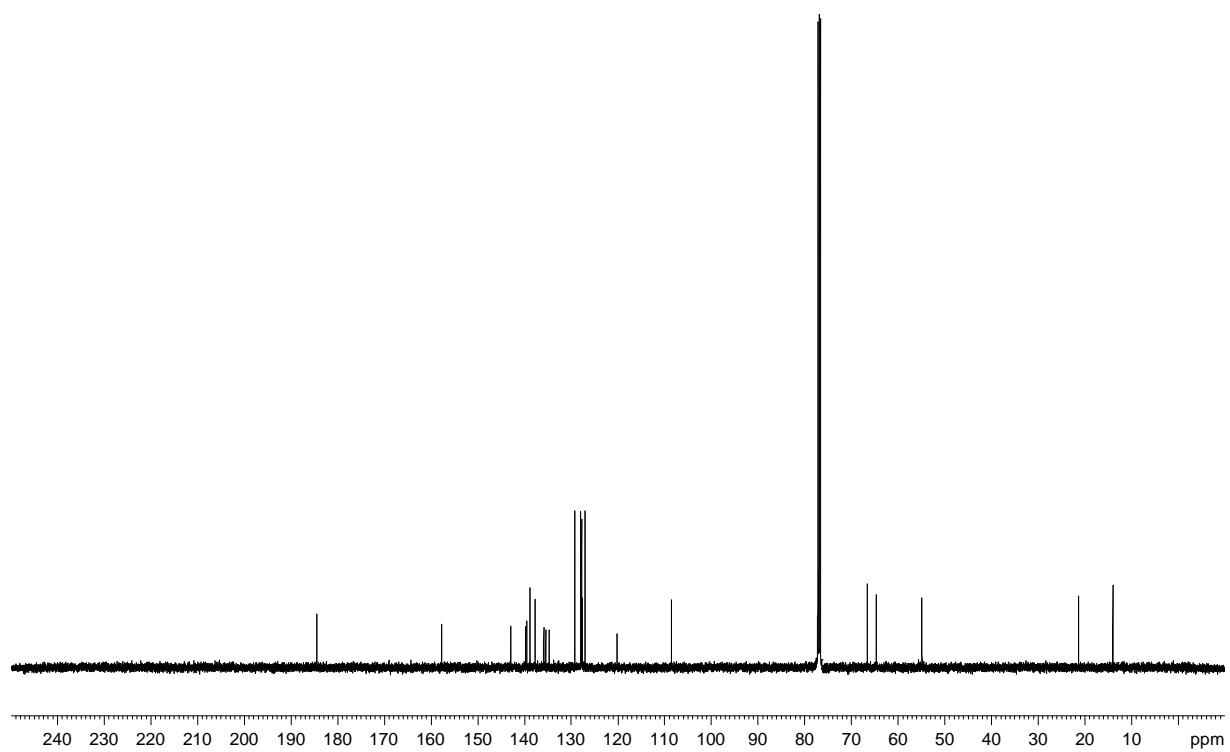

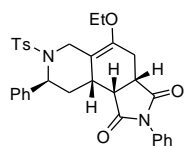

11aa

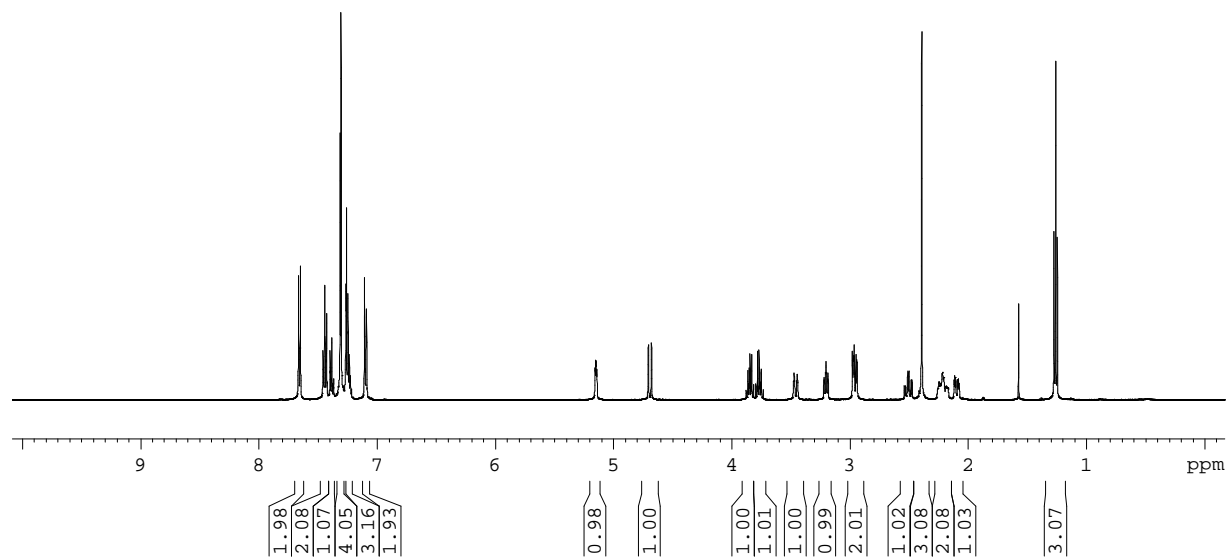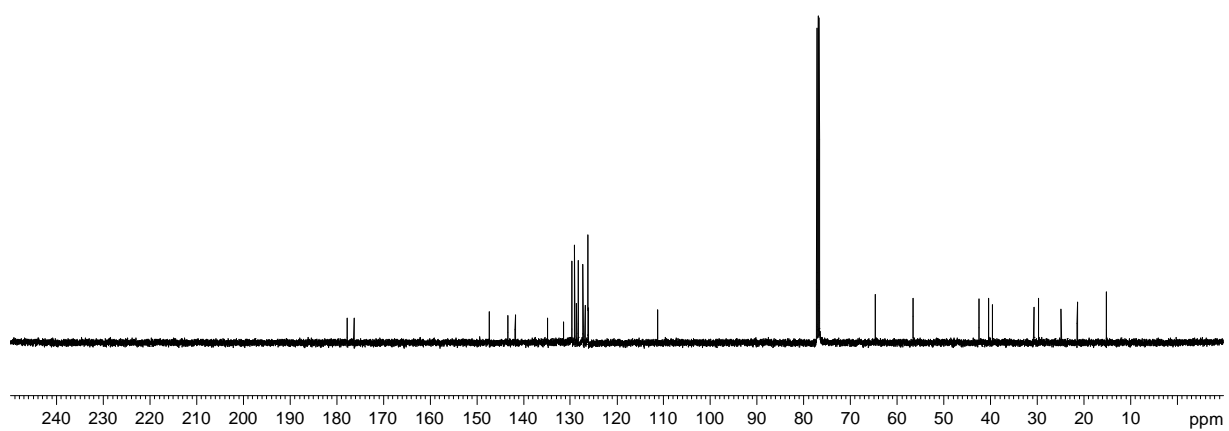



Wang *et al.*

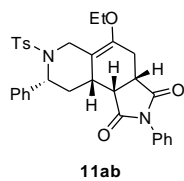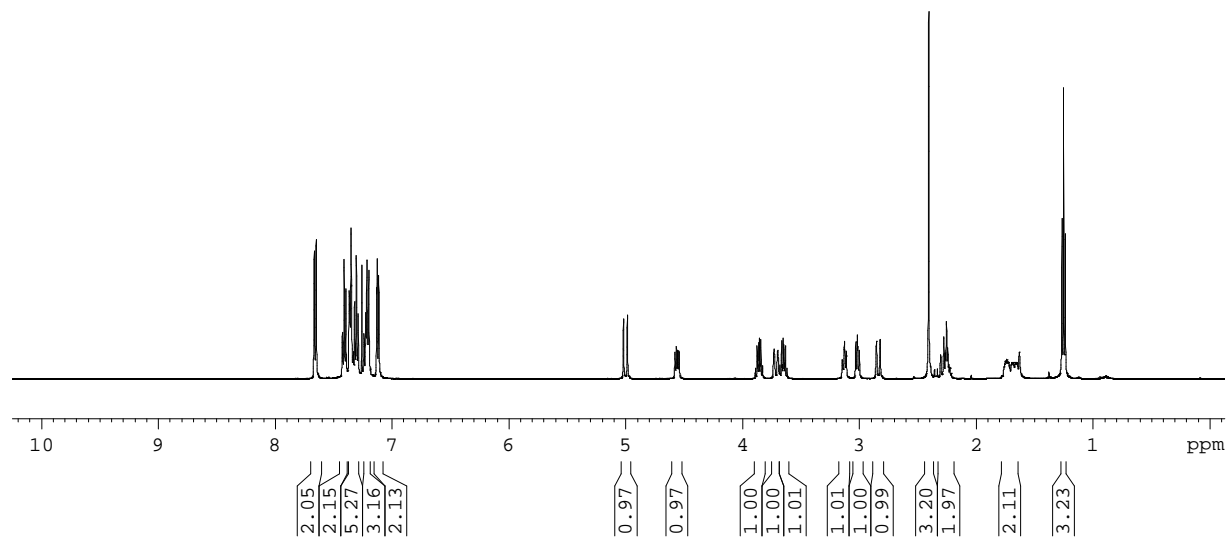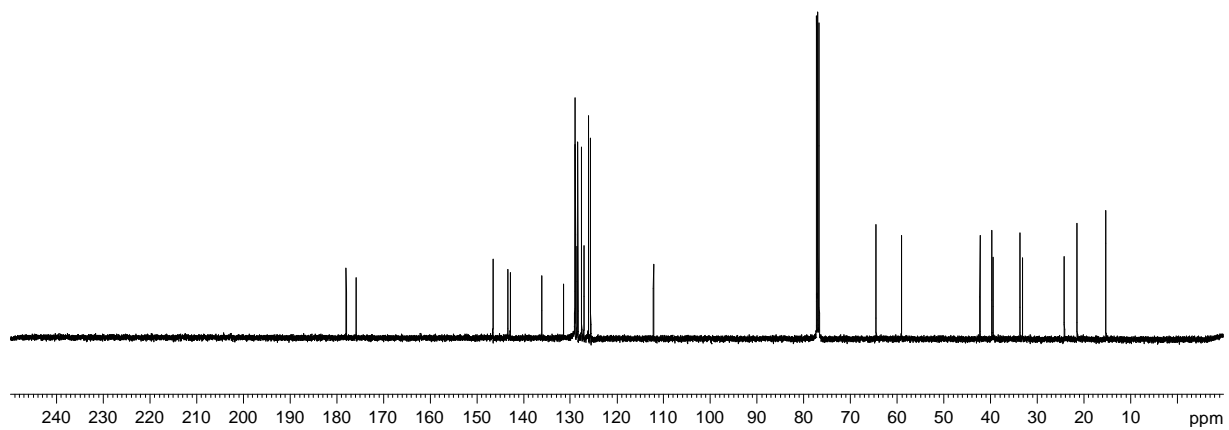

Wang *et al.*

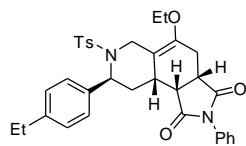

**11ba**

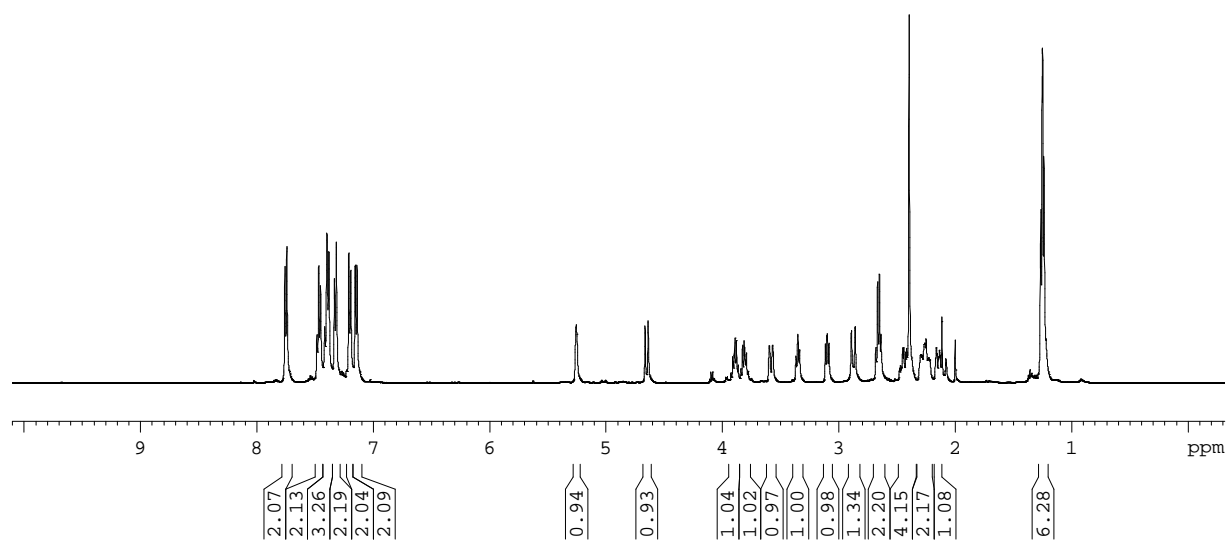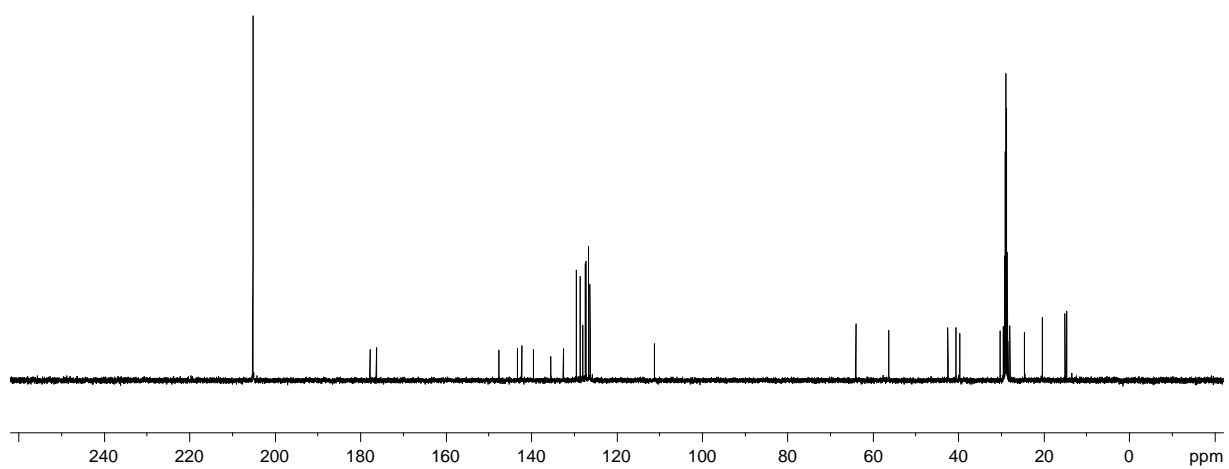

Wang *et al.*

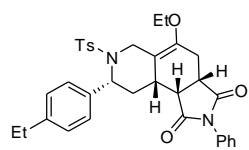

11bb

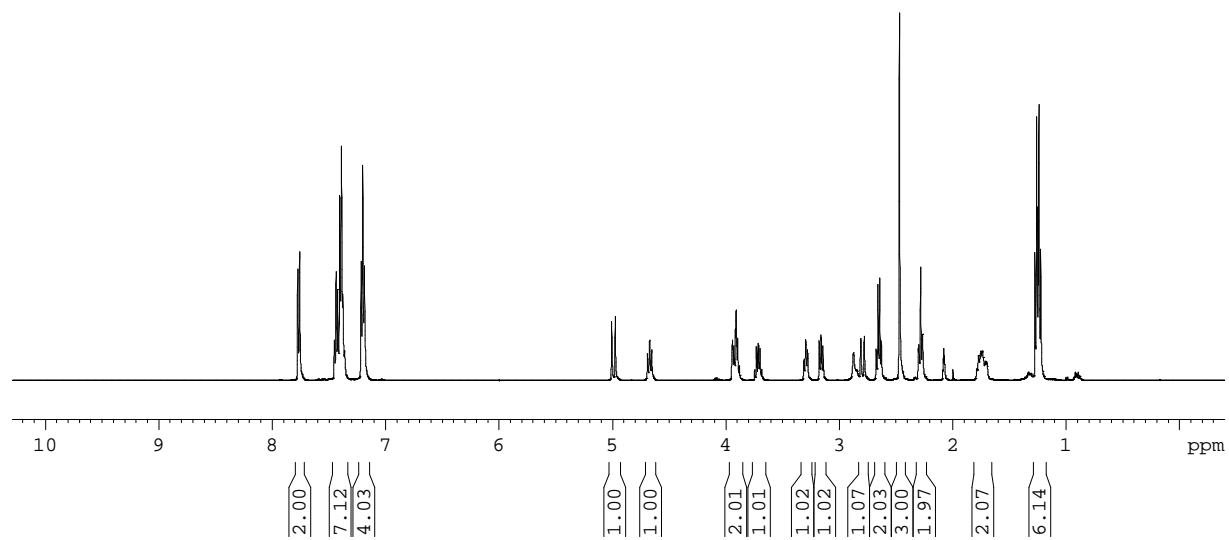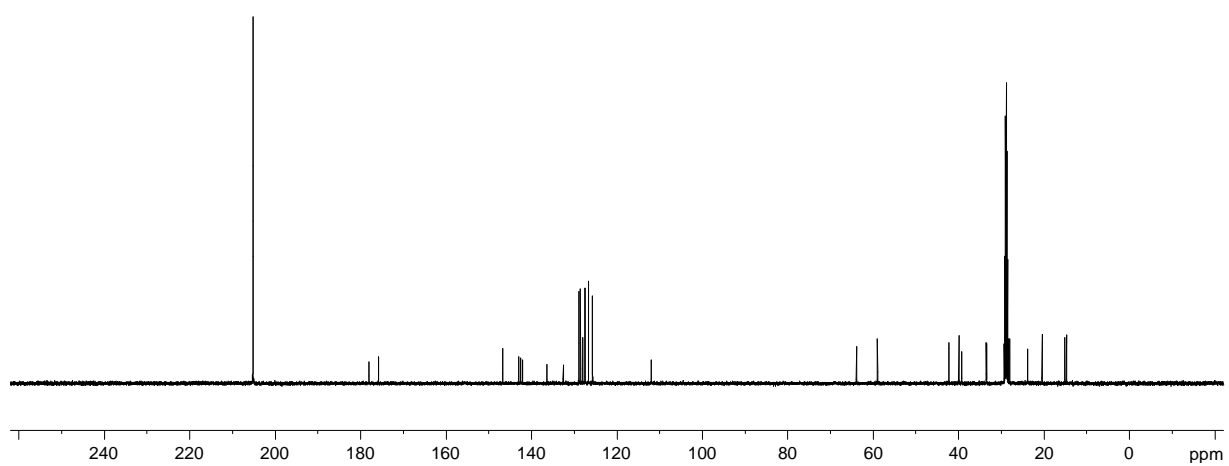

Wang *et al.*

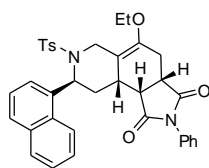

11ca

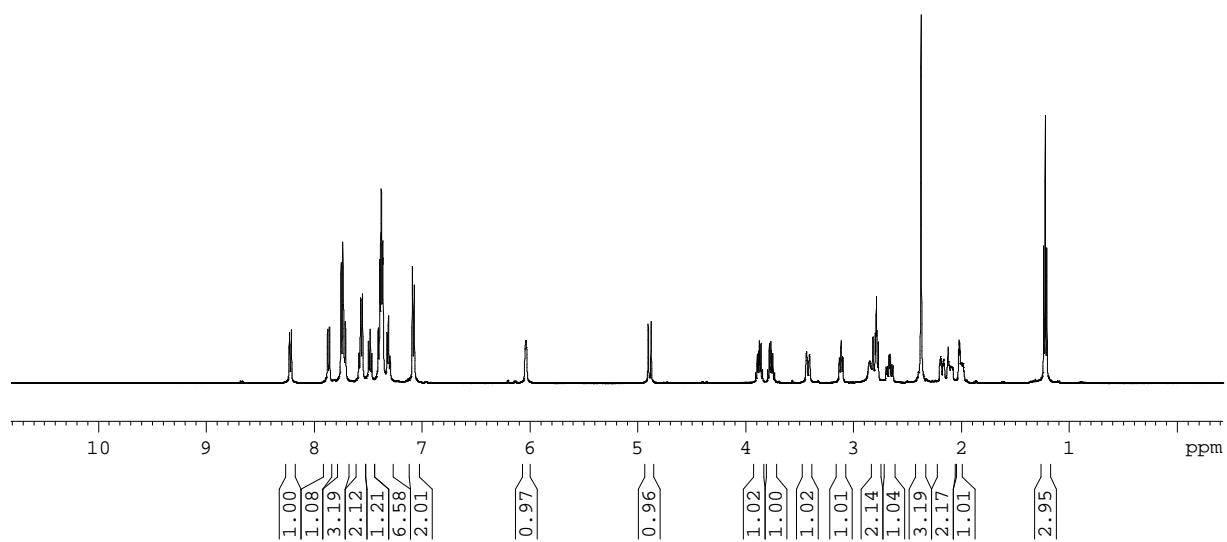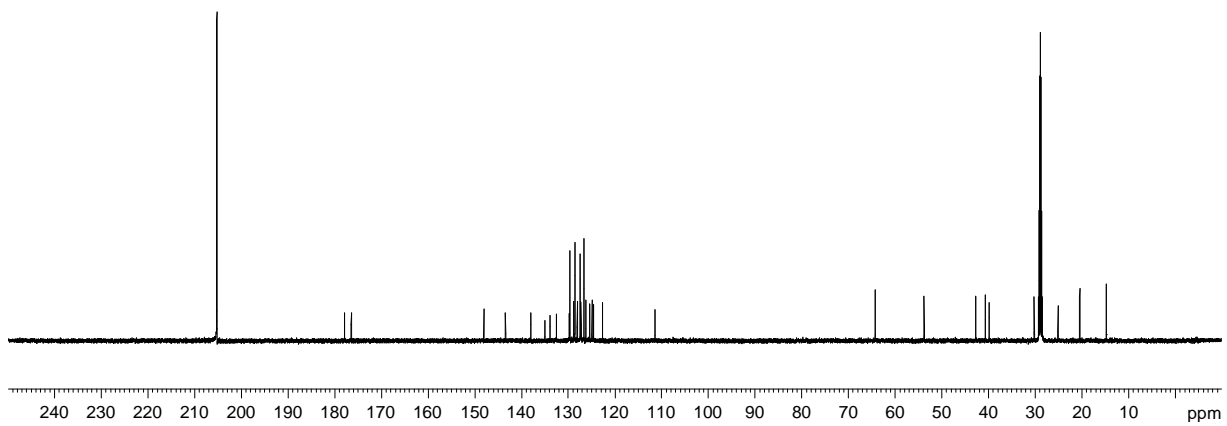

Wang *et al.*

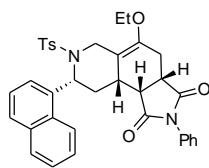

11cb

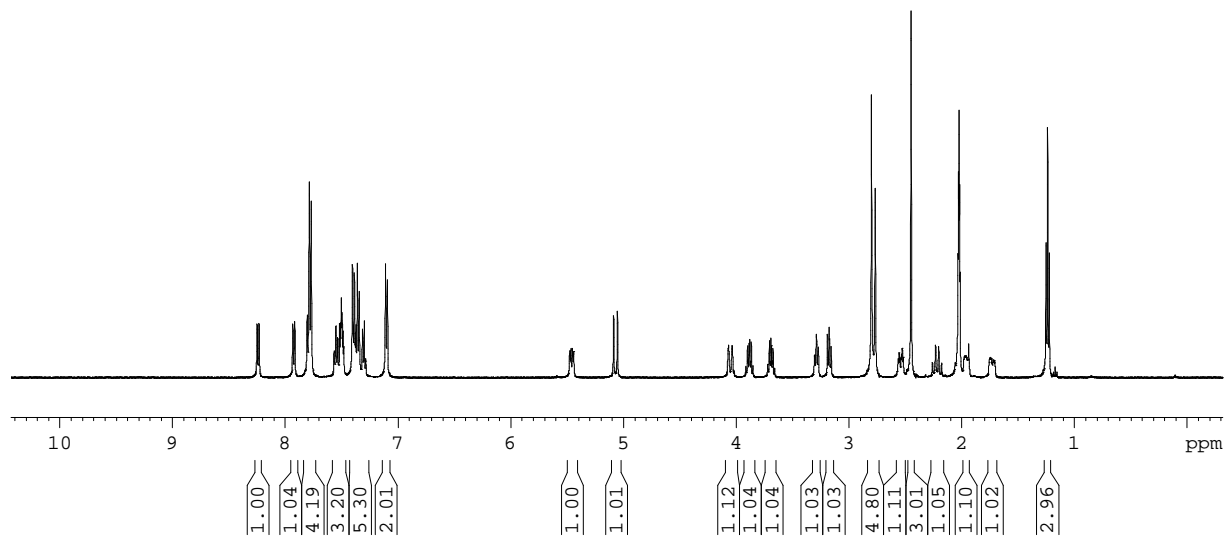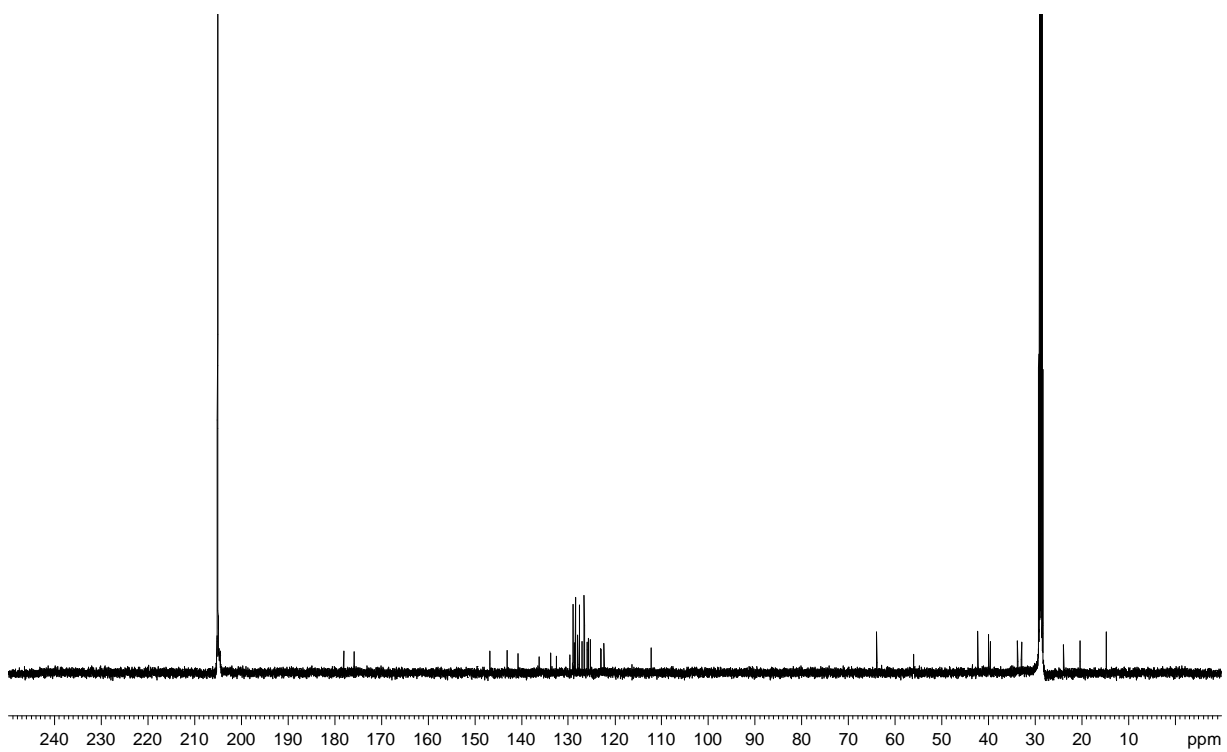

Wang *et al.*

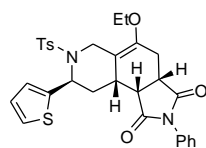

11da

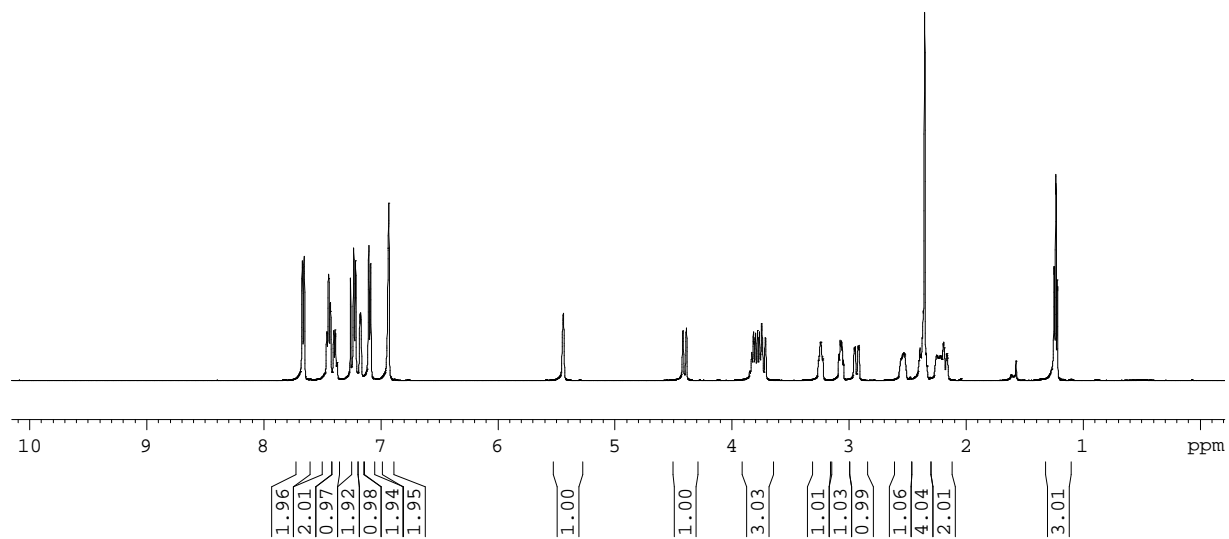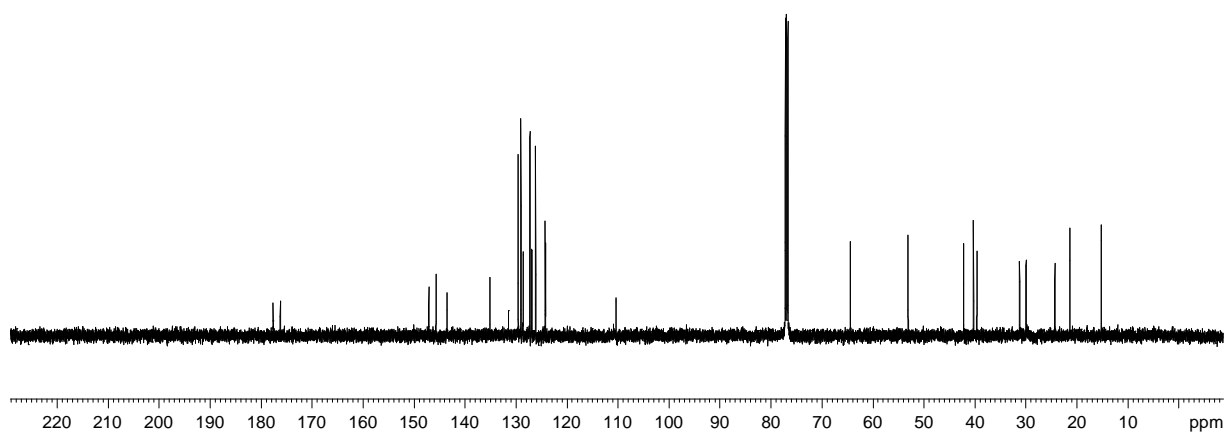

Wang *et al.*

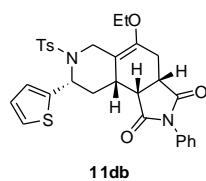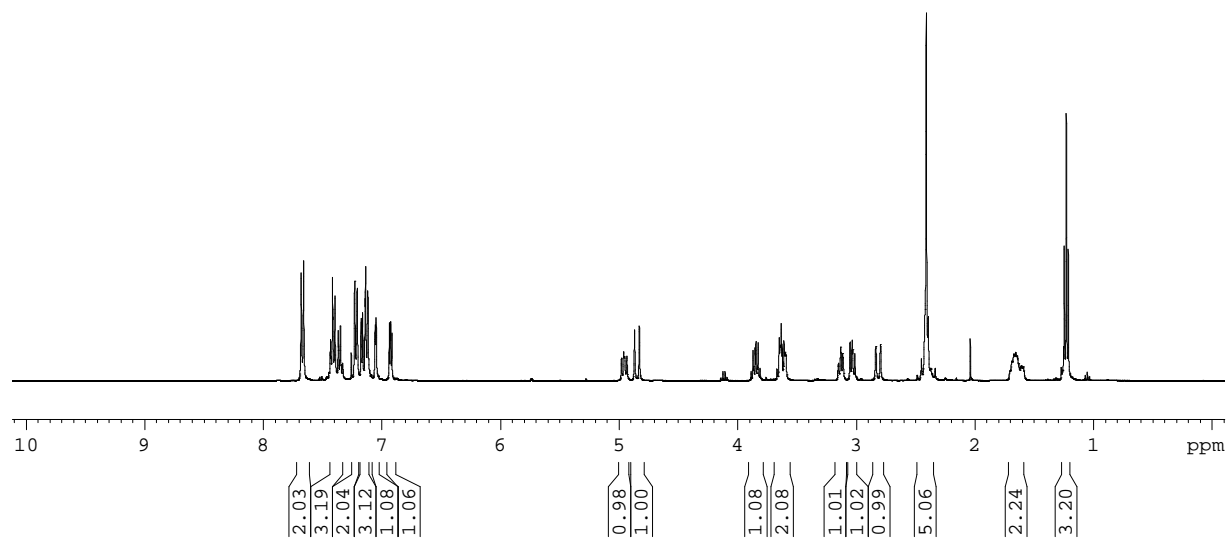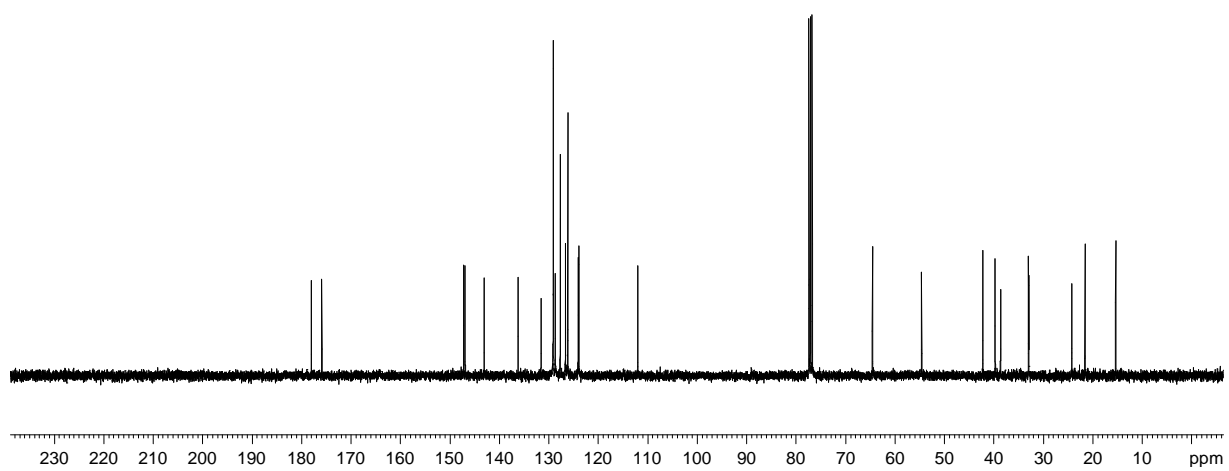

Wang *et al.*

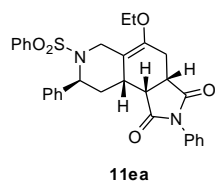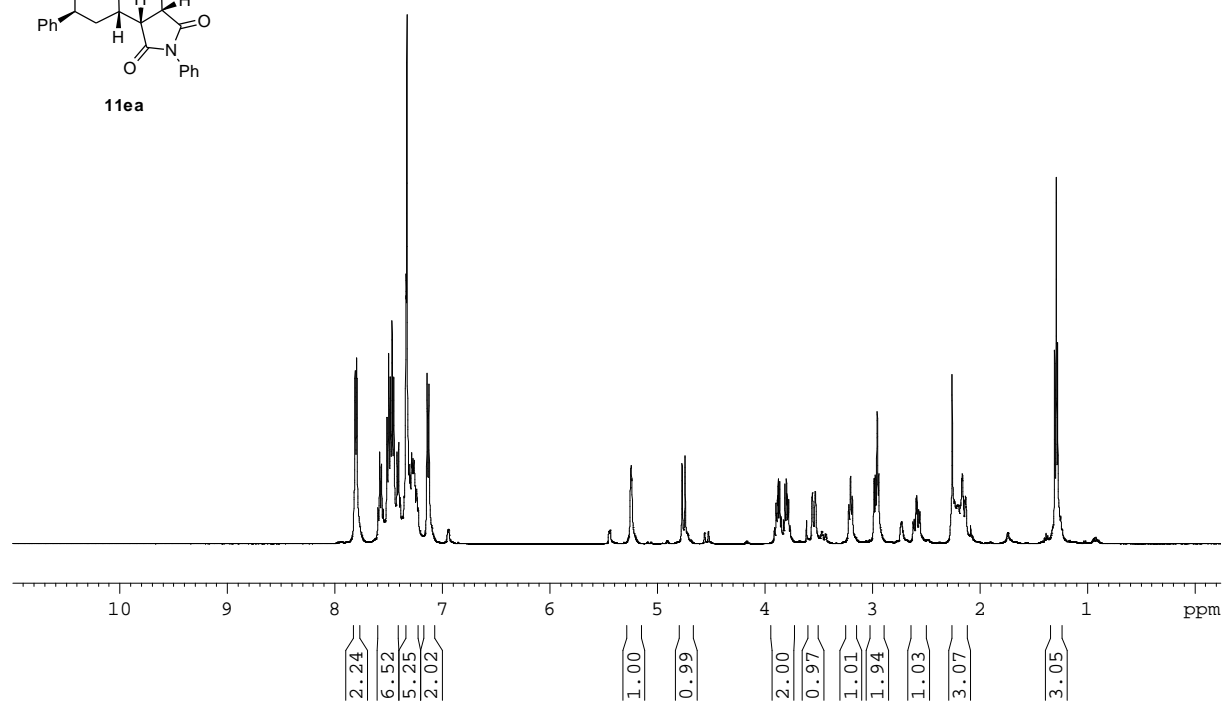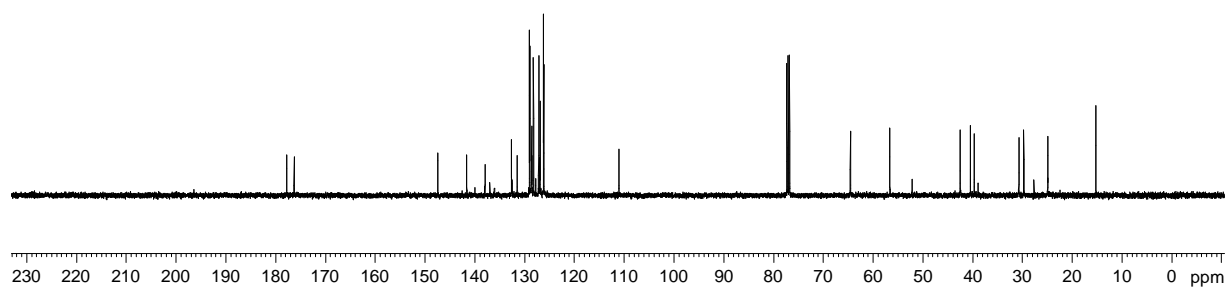



Wang *et al.*

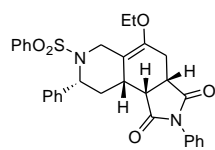

11eb

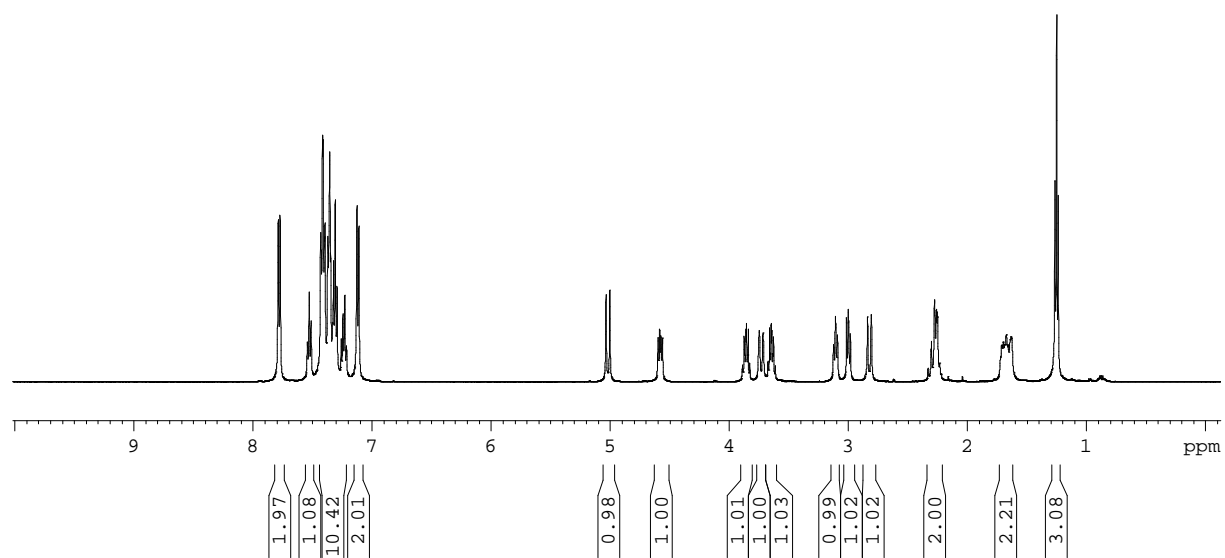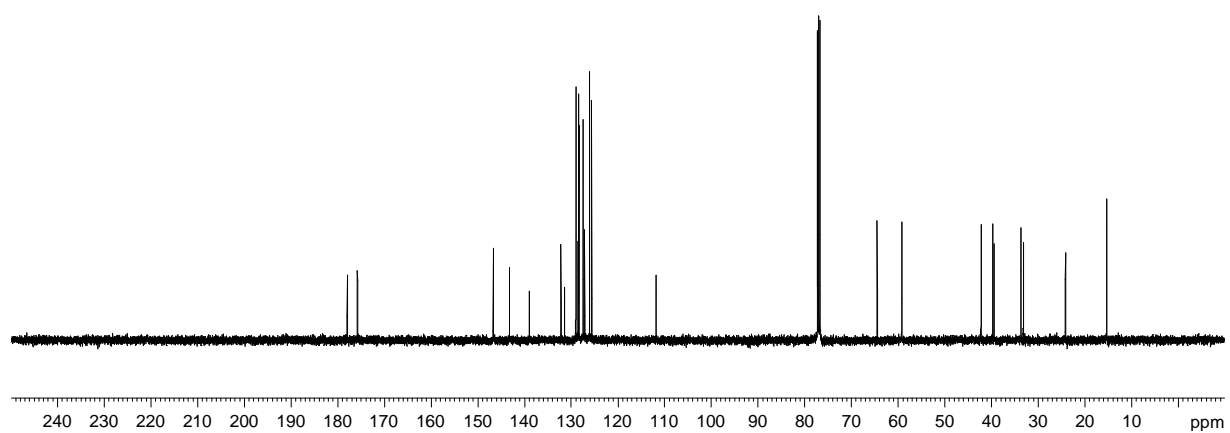

Wang *et al.*

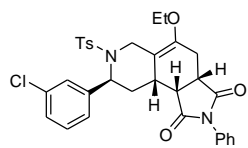

11fa

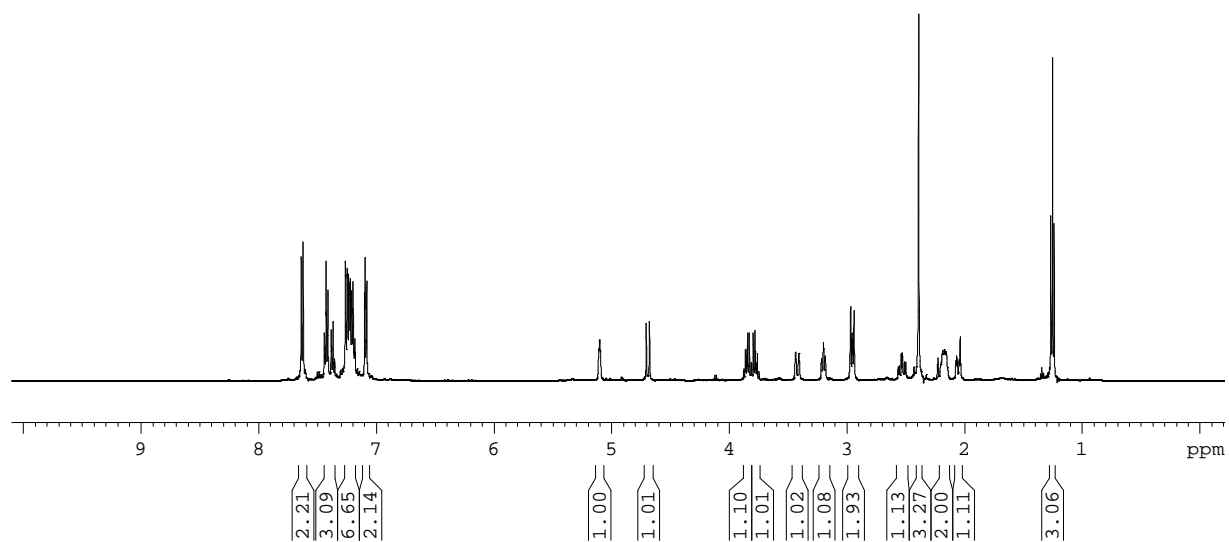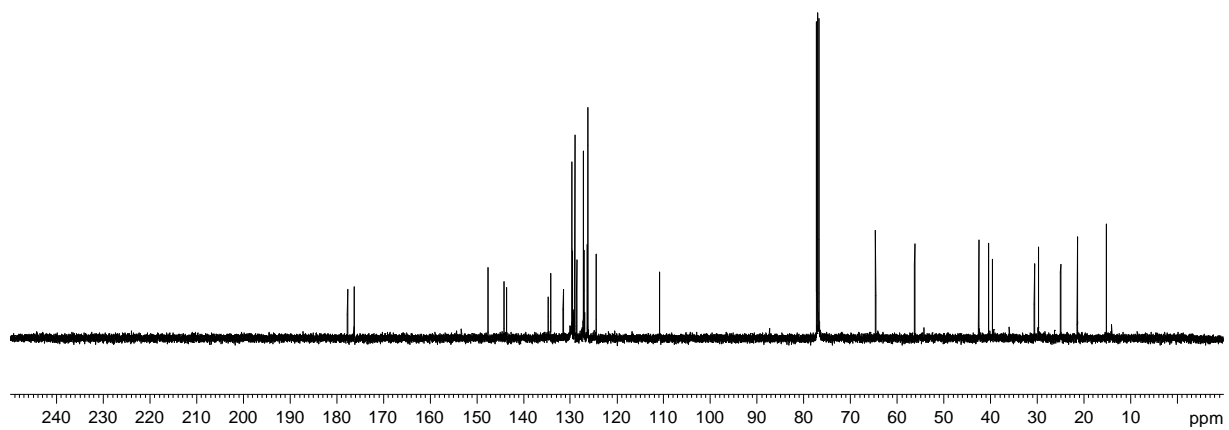

Wang *et al.*

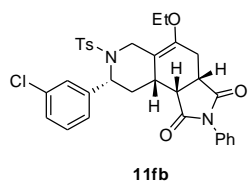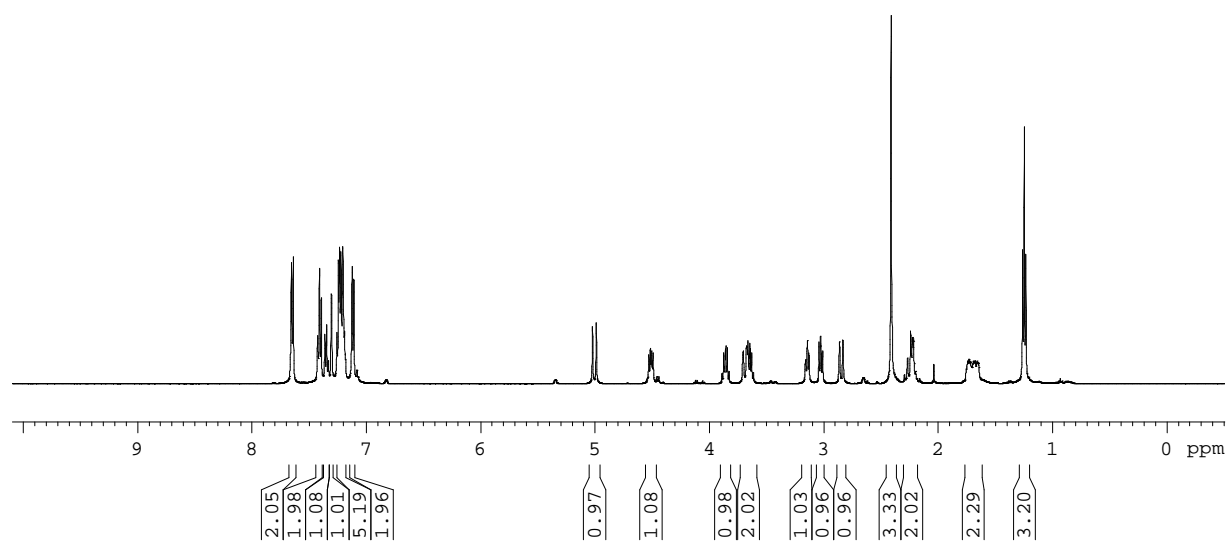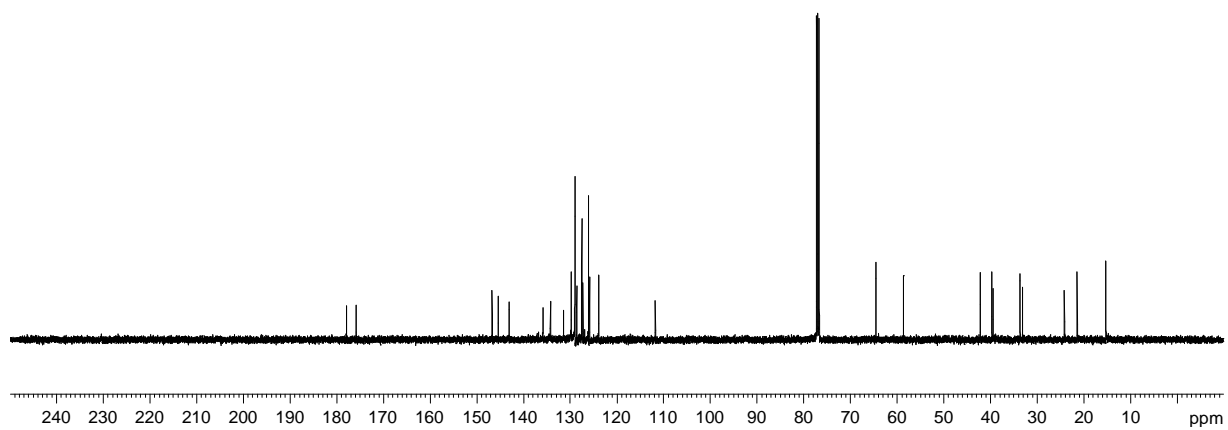

Wang *et al.*

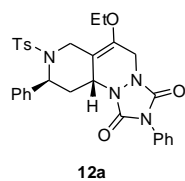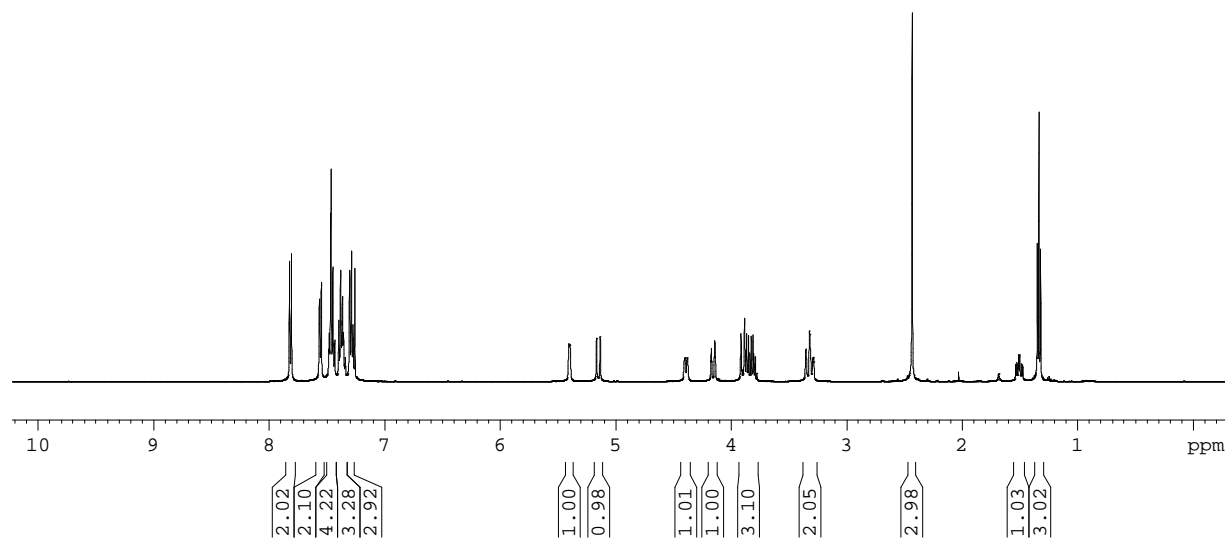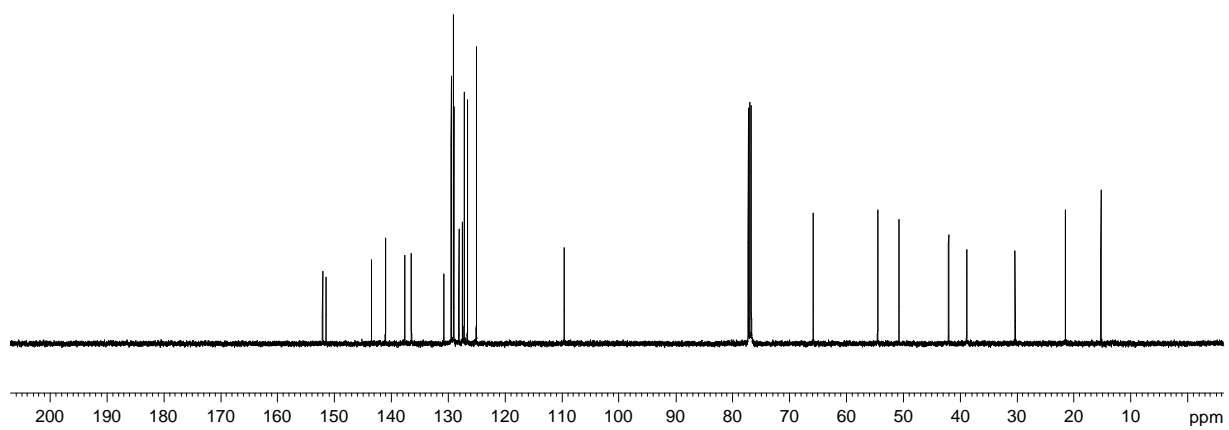

Wang *et al.*

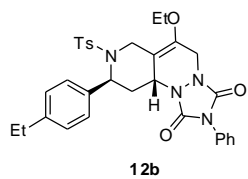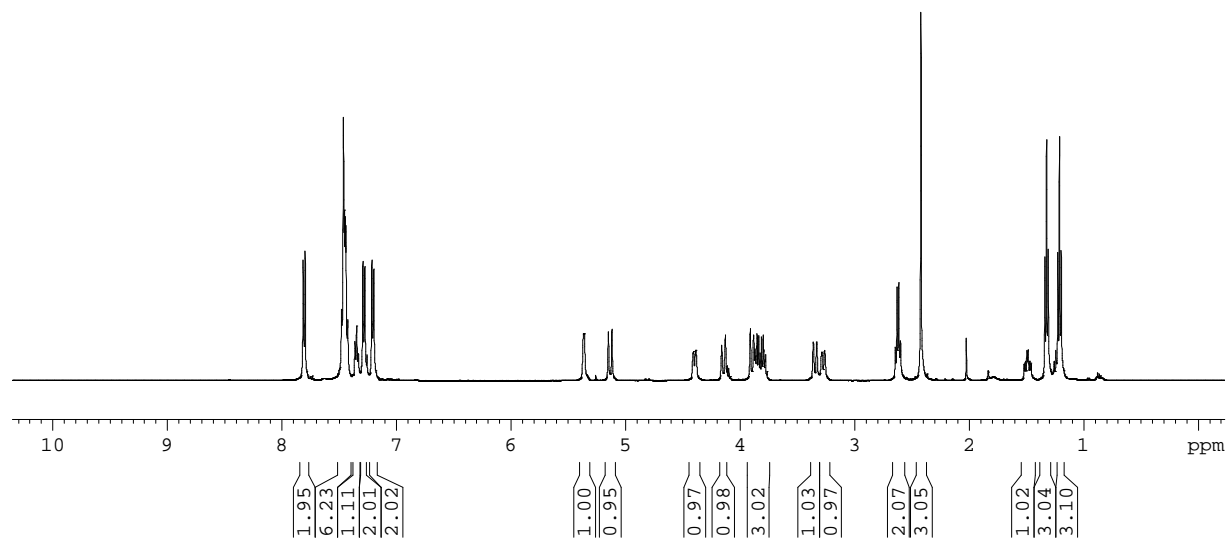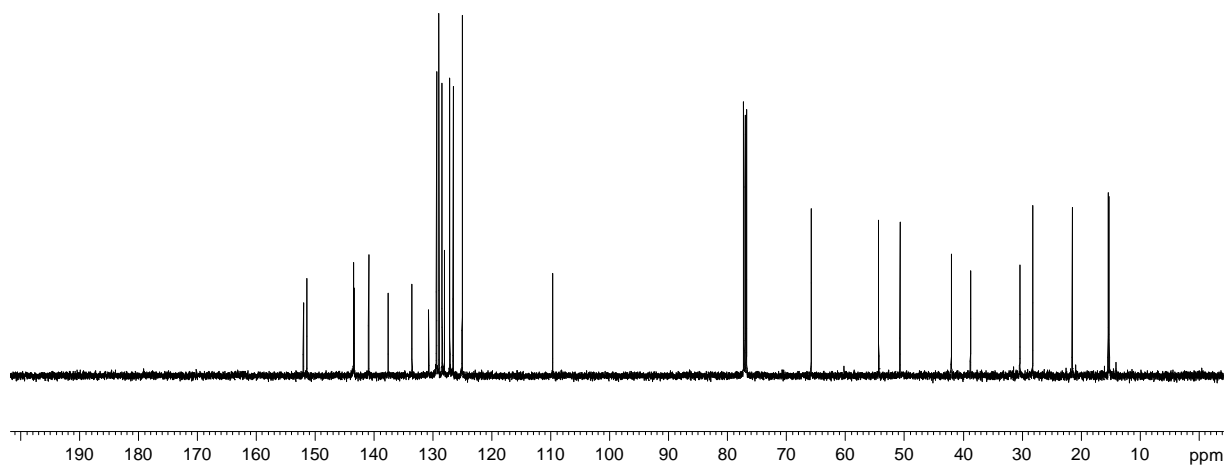

Wang *et al.*

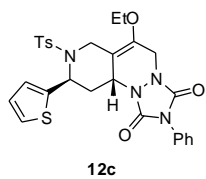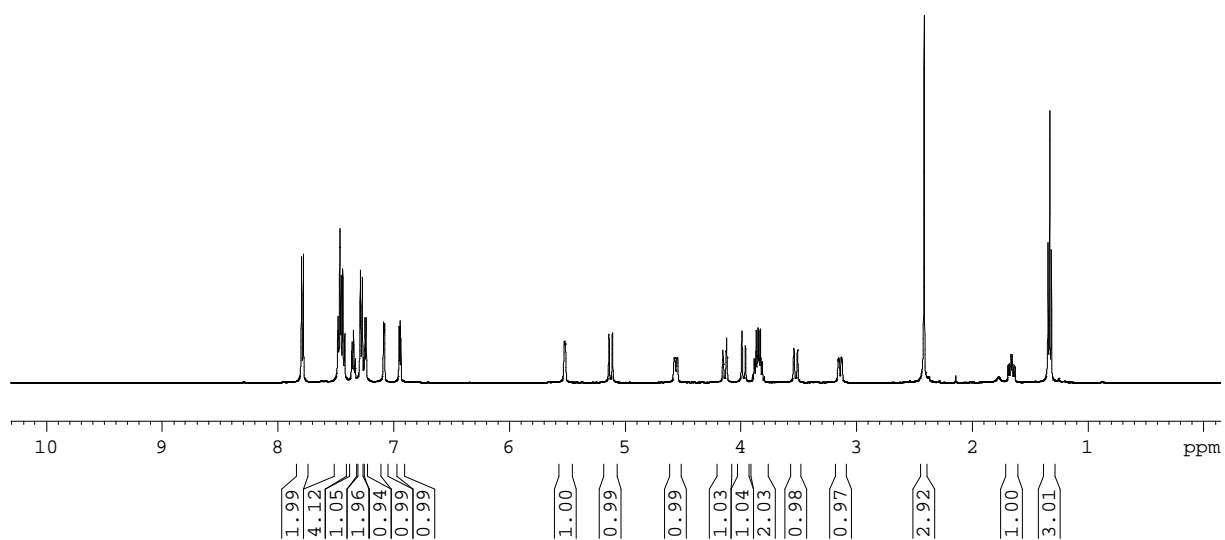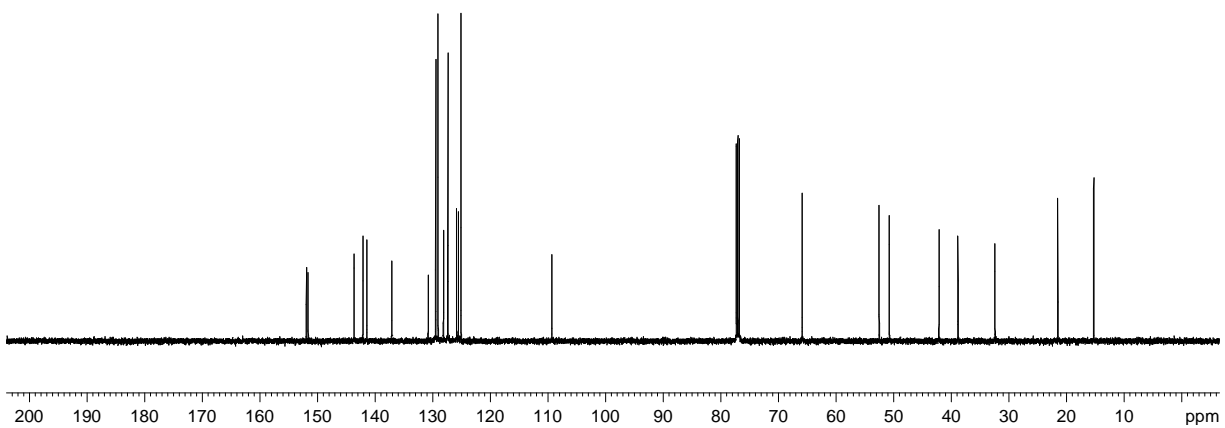

Wang *et al.*

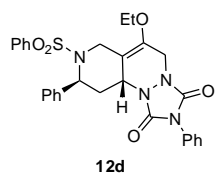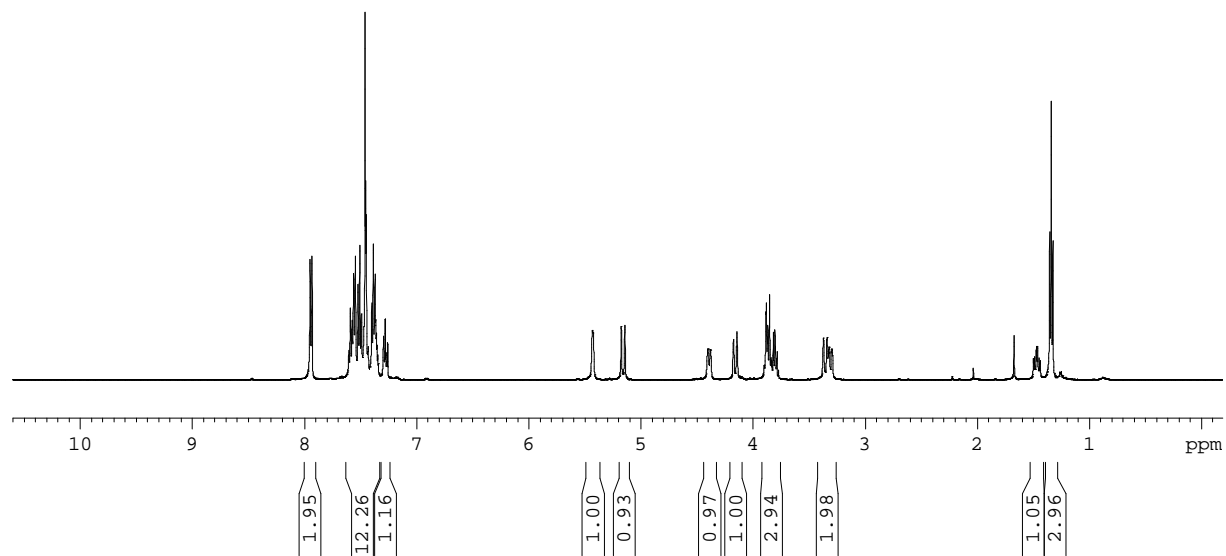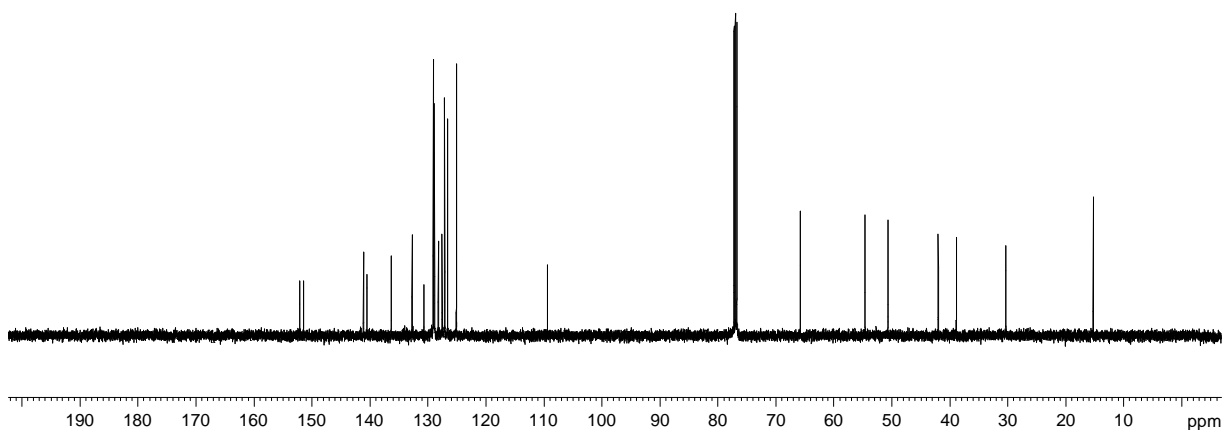

Wang *et al.*

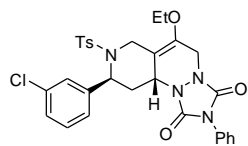

12e

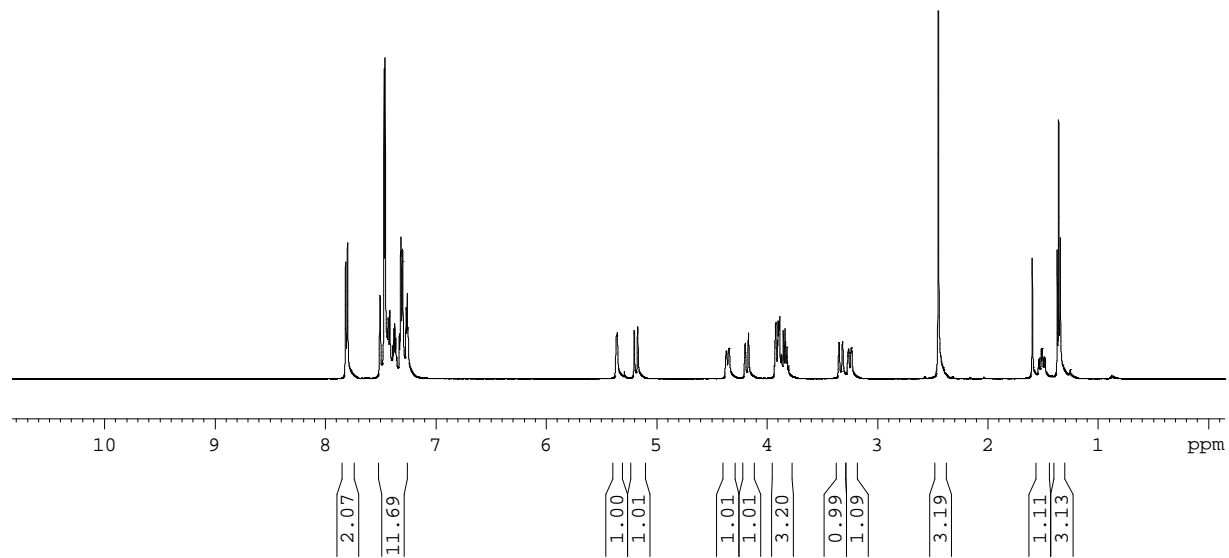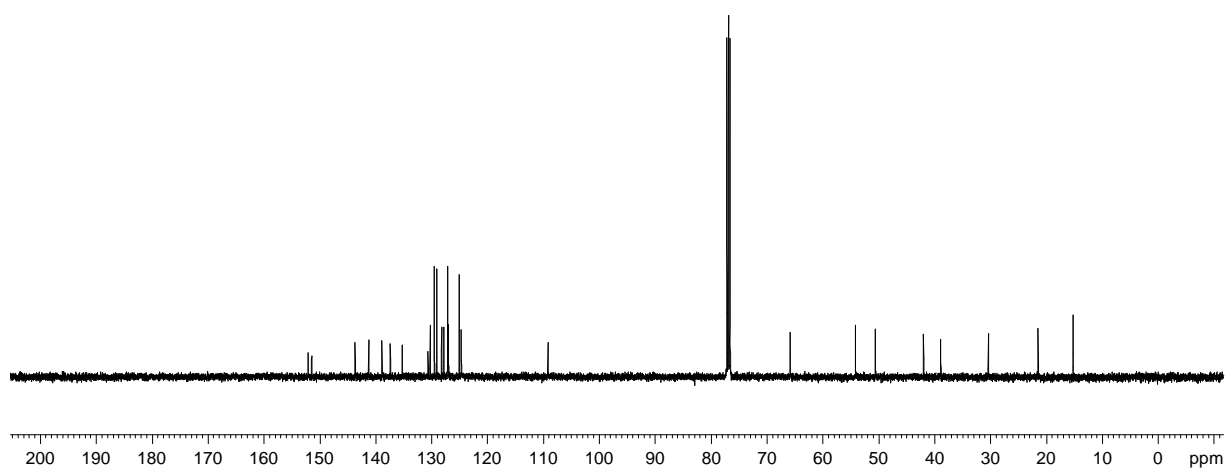



Wang *et al.*

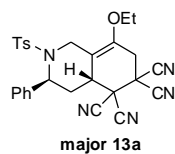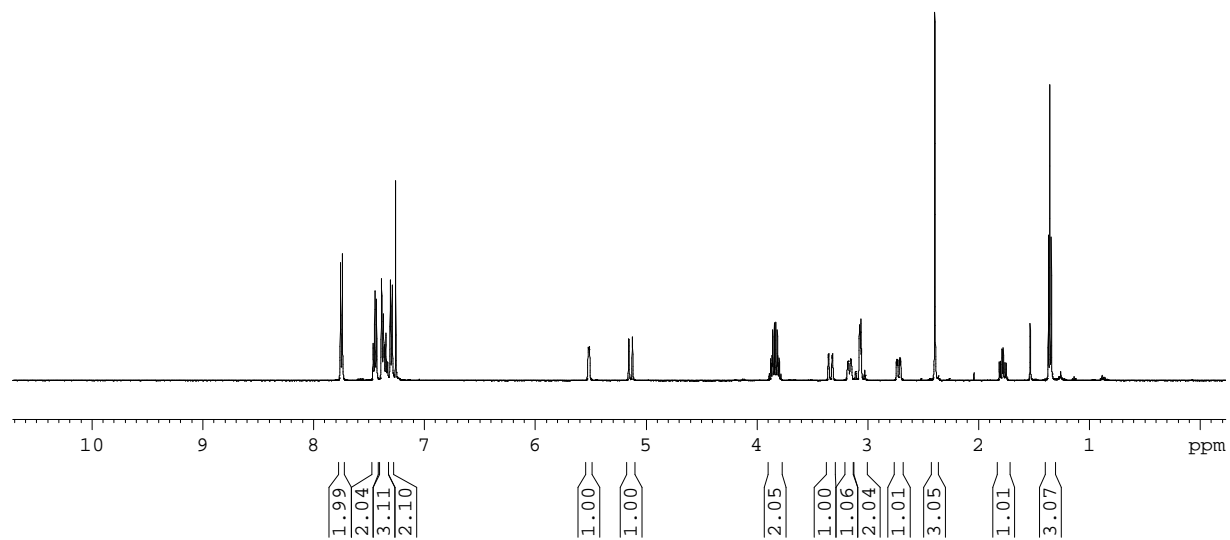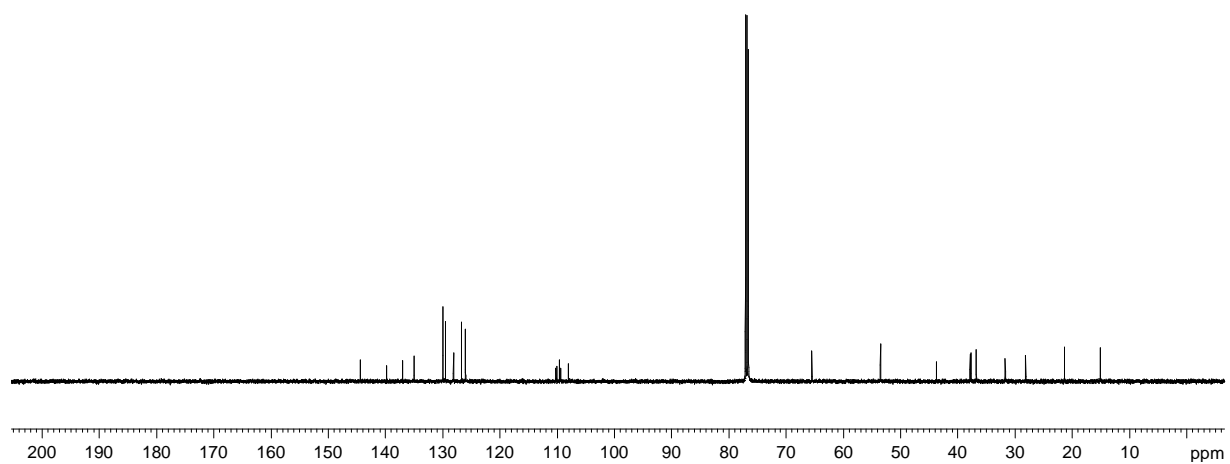

Wang *et al.*

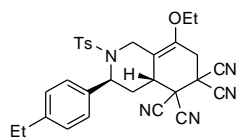

major 13b

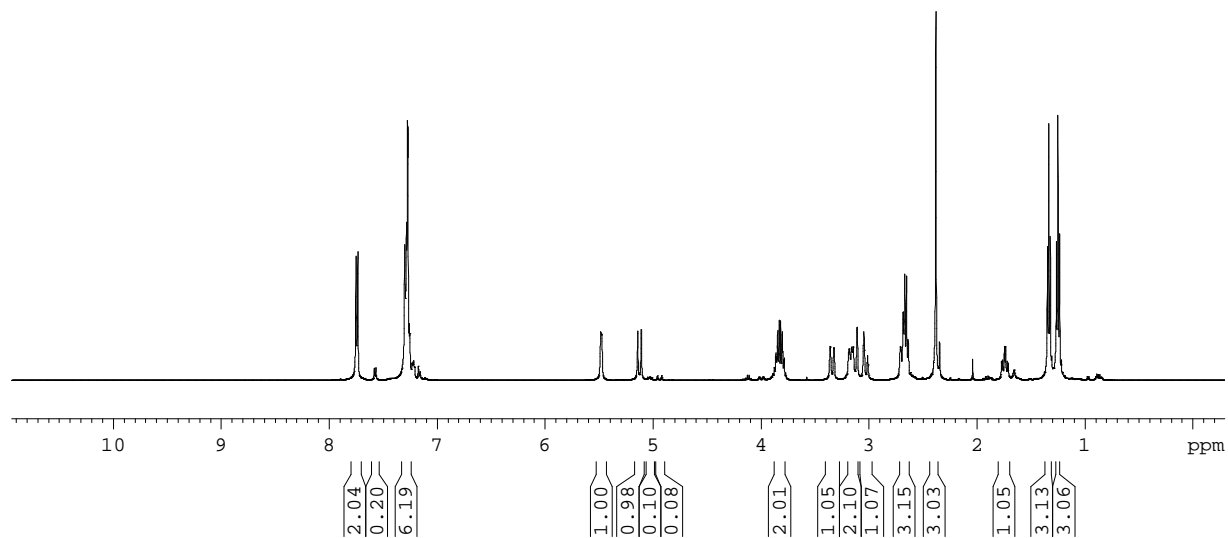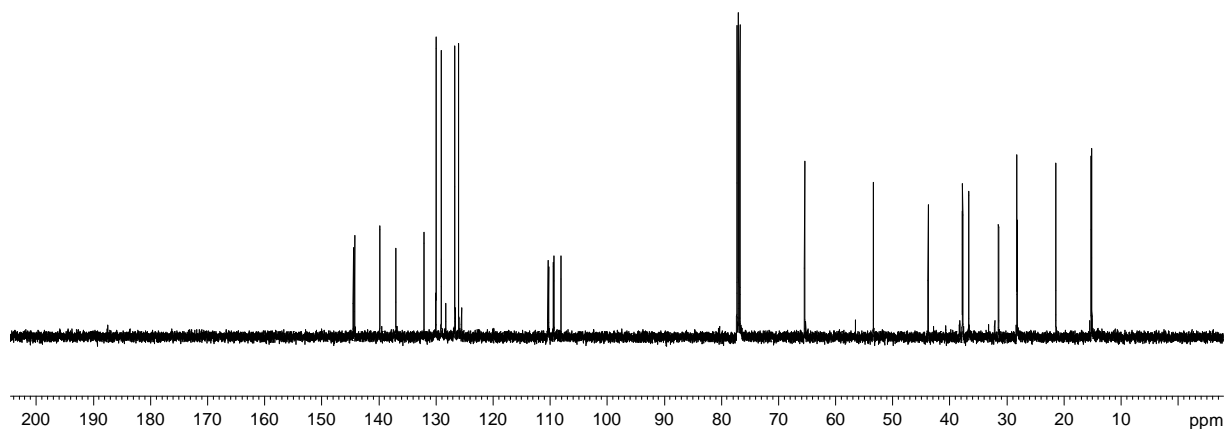

Wang *et al.*

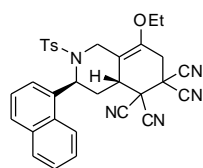

major 13c

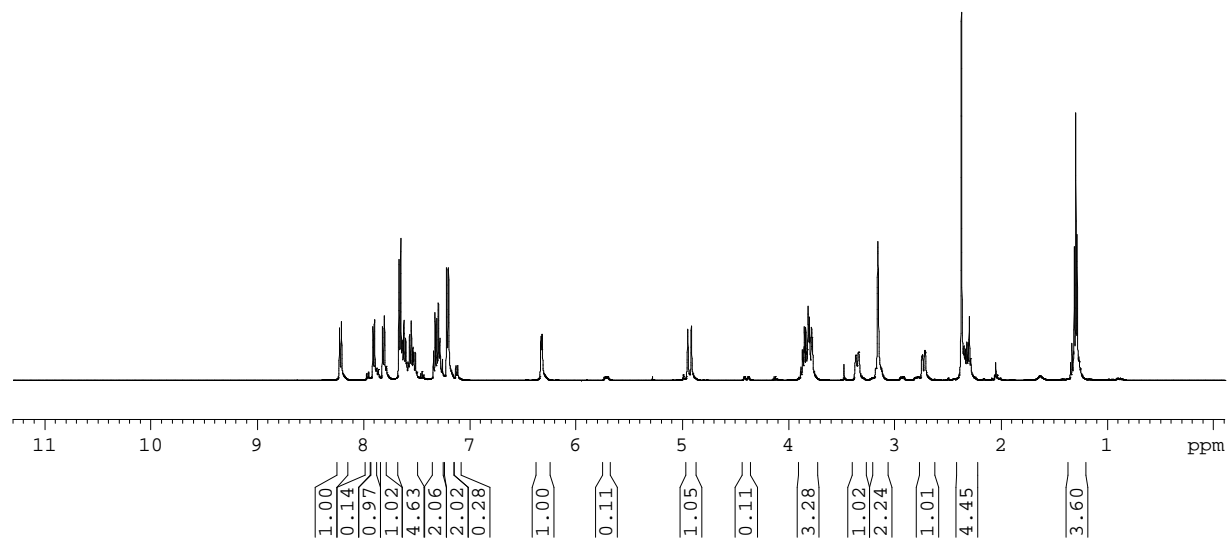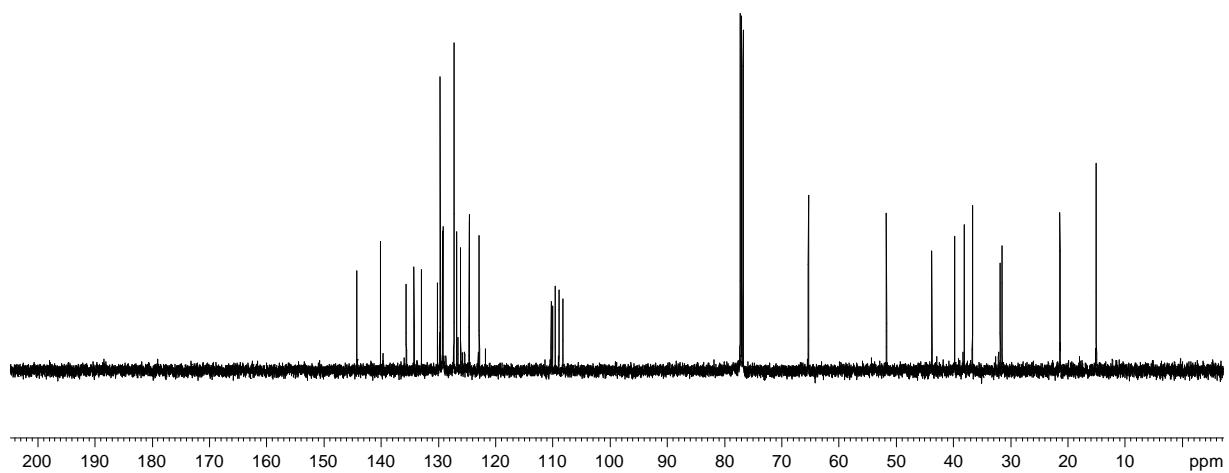

Wang *et al.*

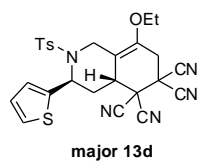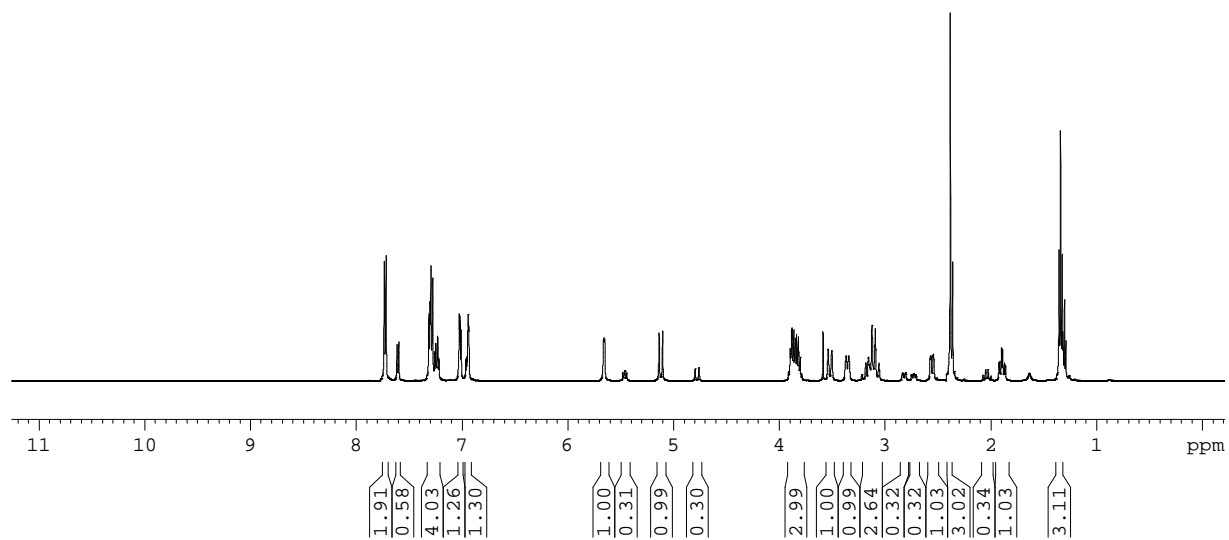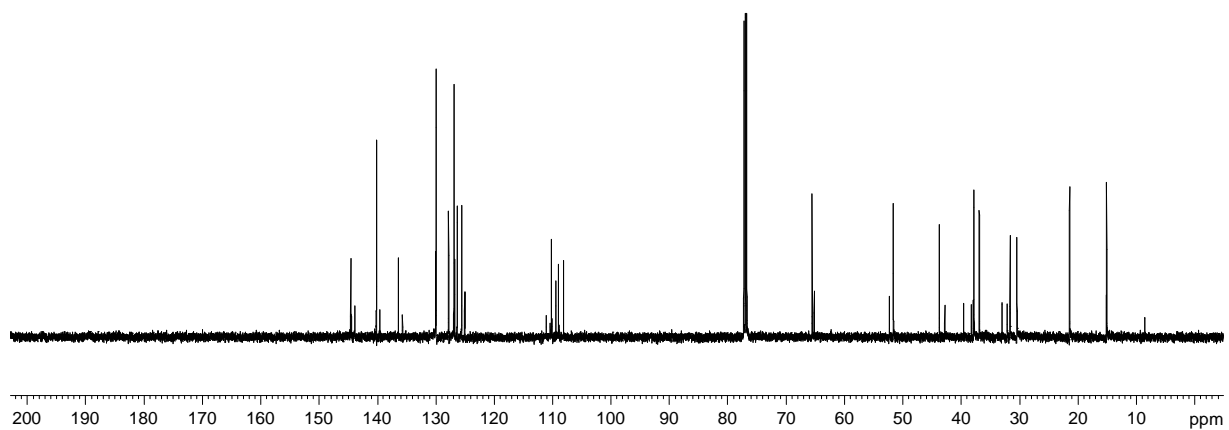

Wang *et al.*

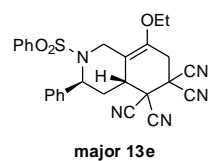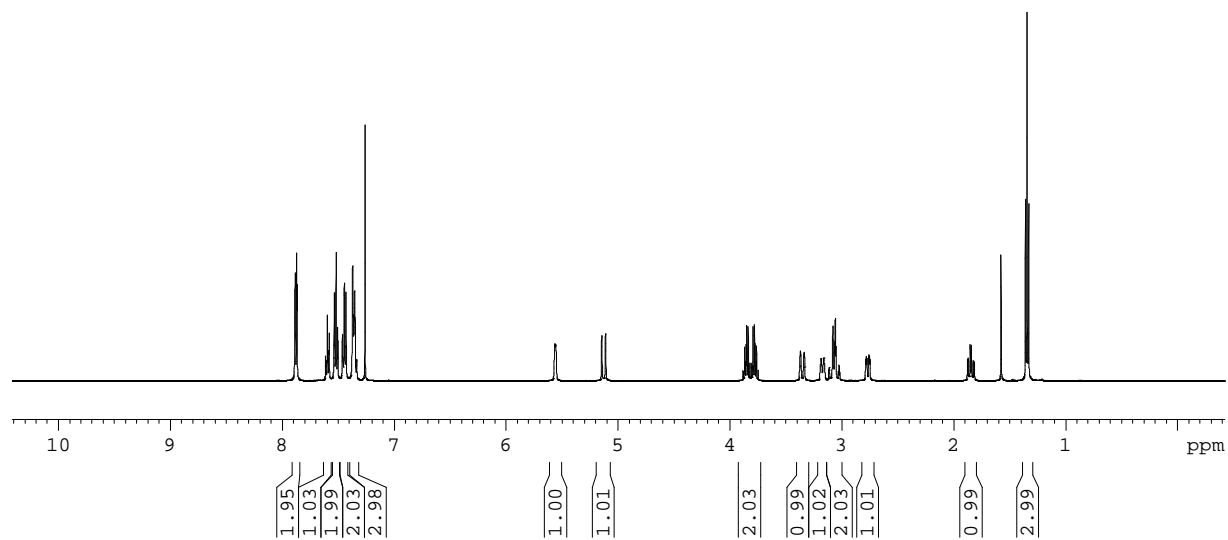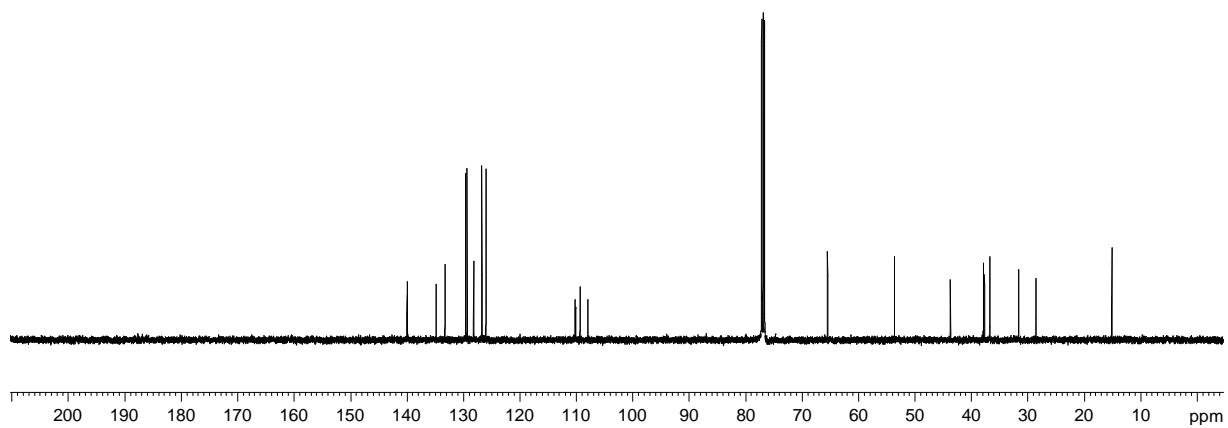

Wang *et al.*

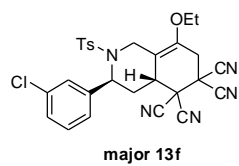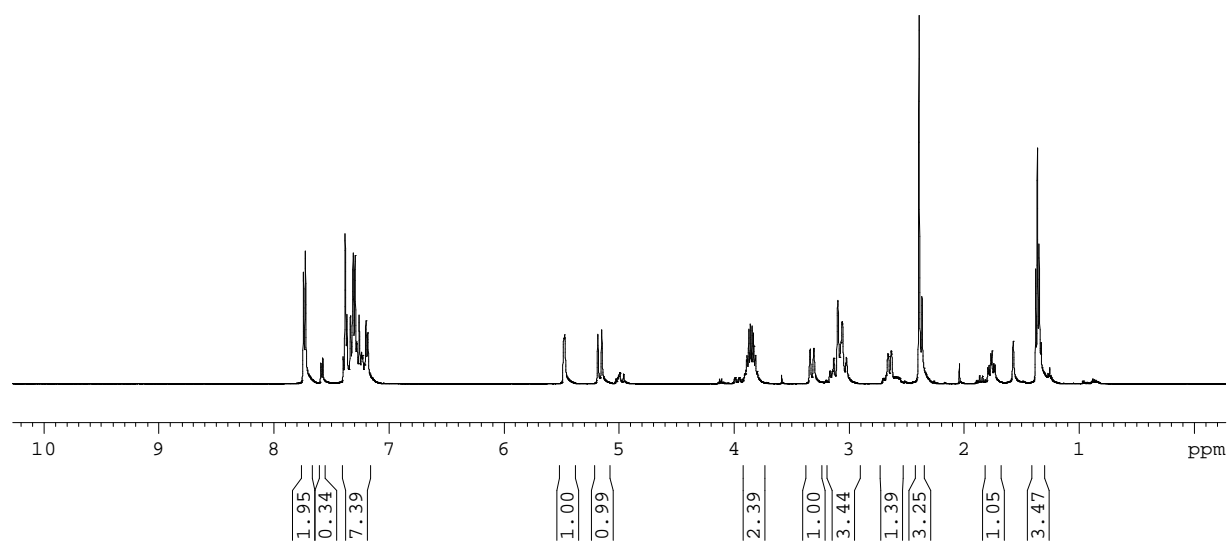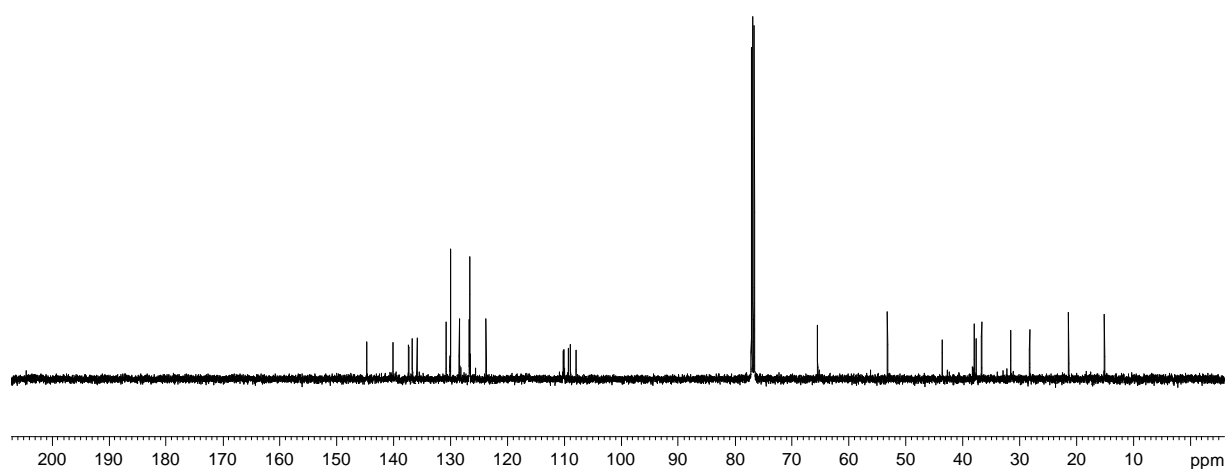

Wang *et al.*

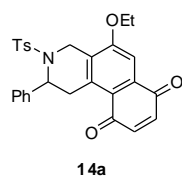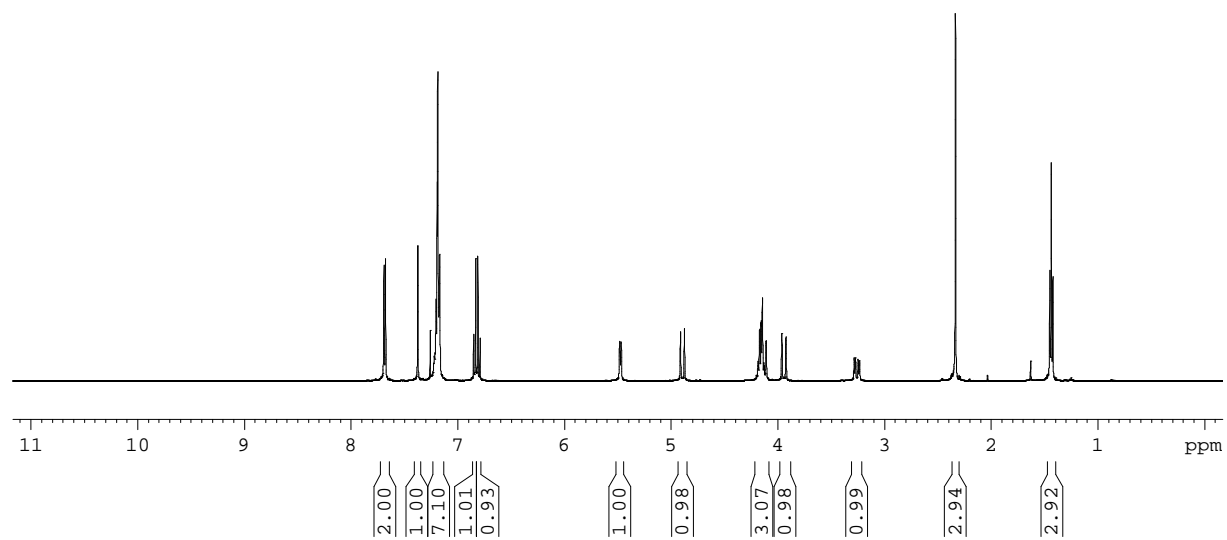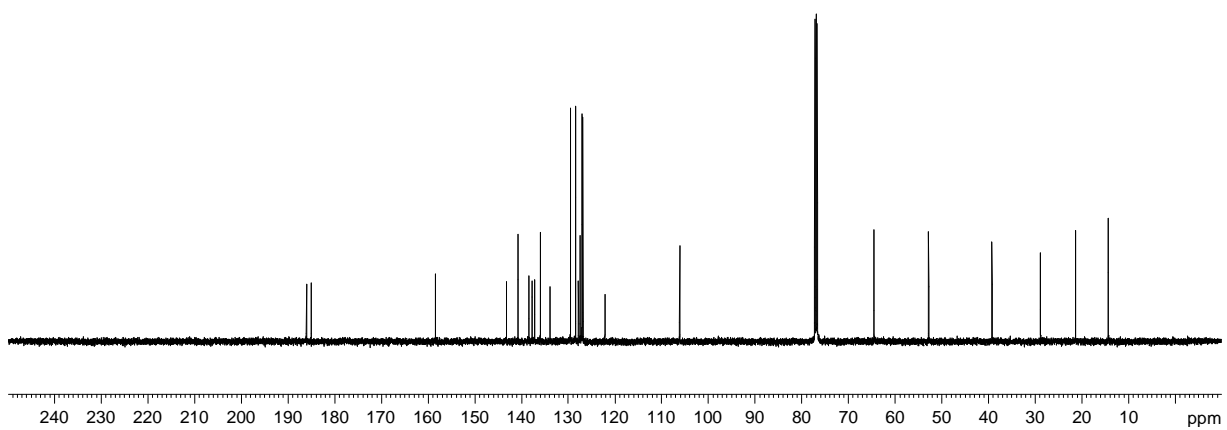

Wang *et al.*

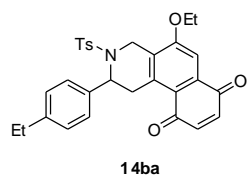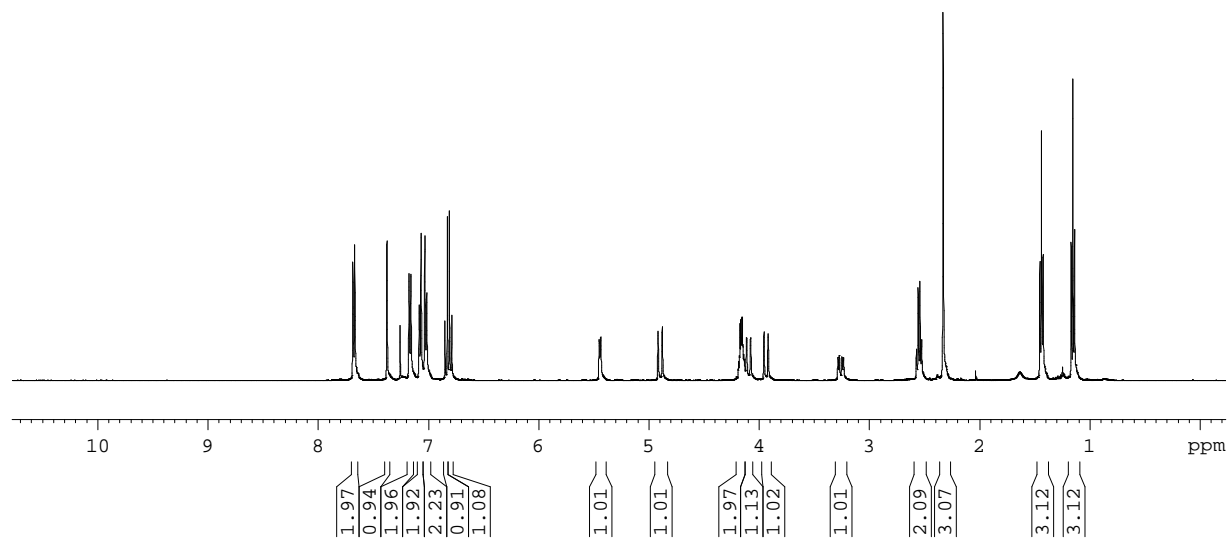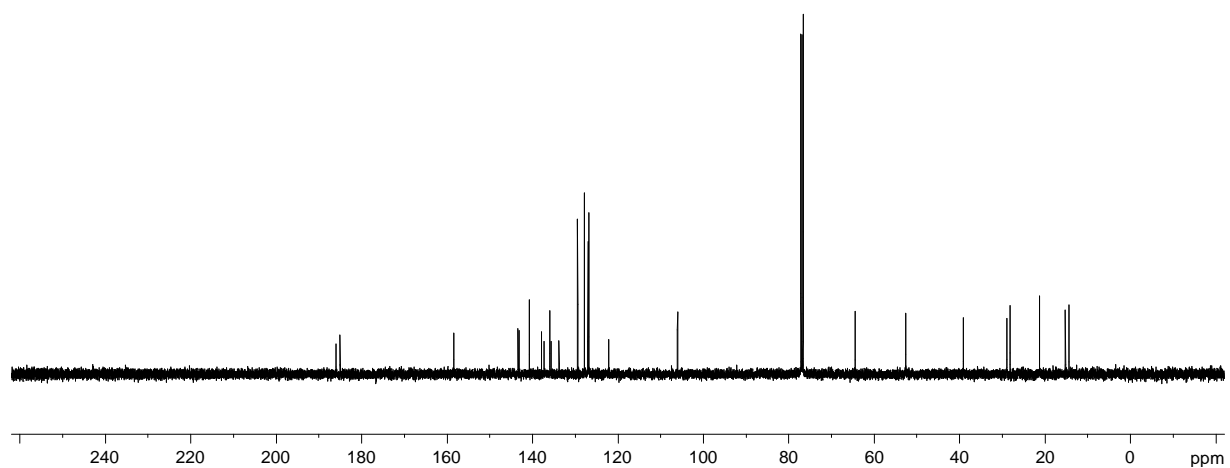



Wang *et al.*

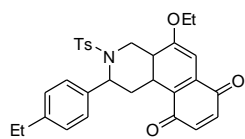

14bb

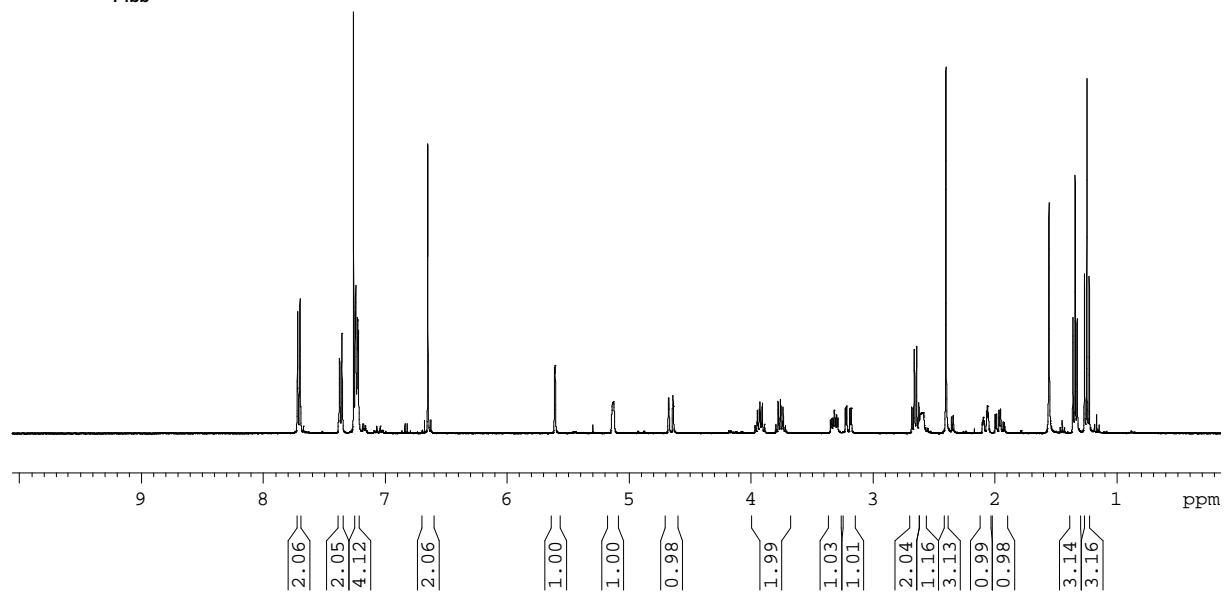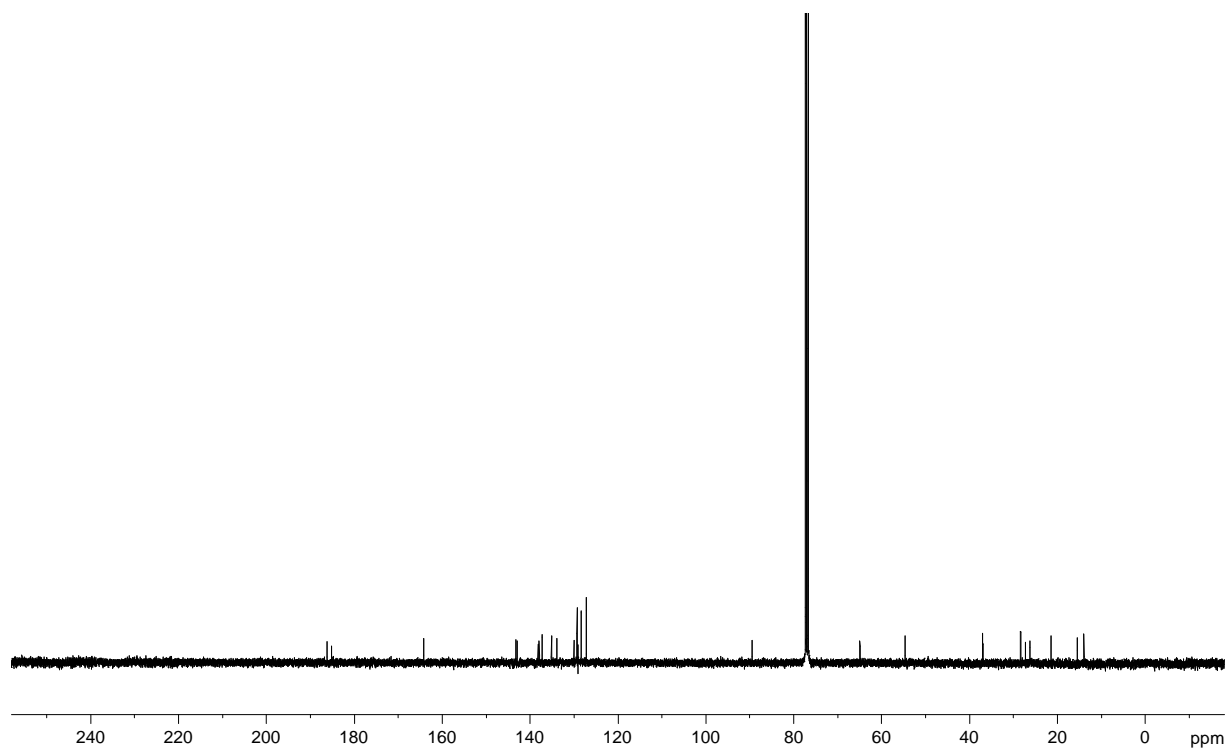

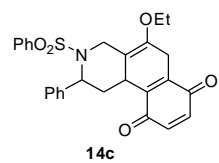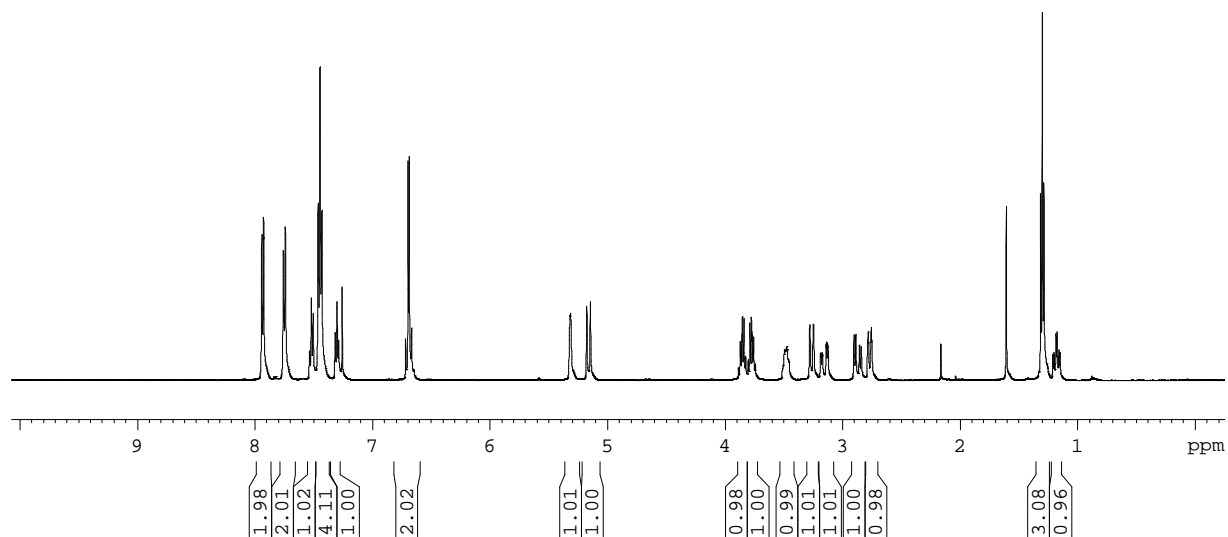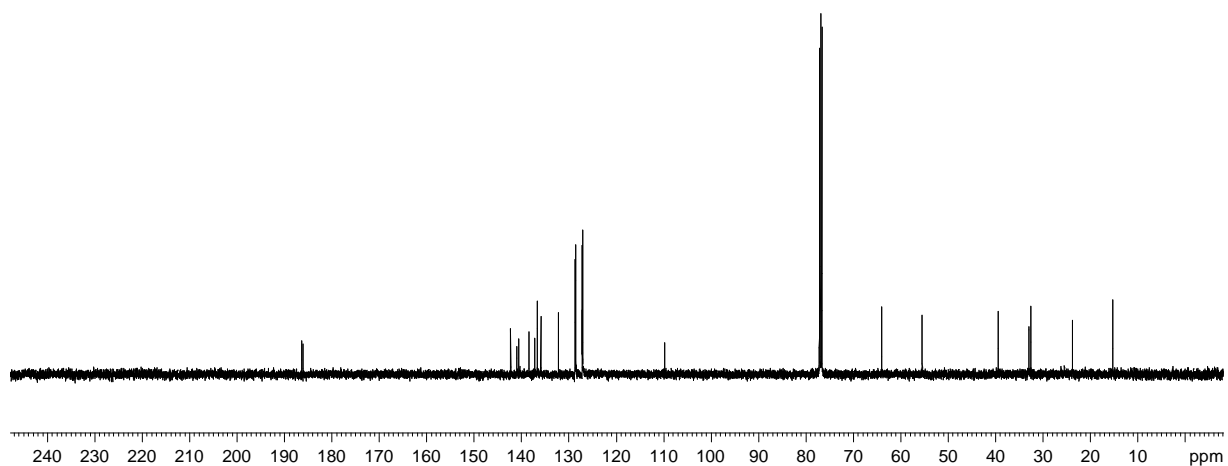

Wang *et al.*

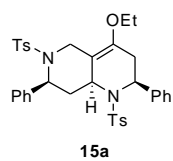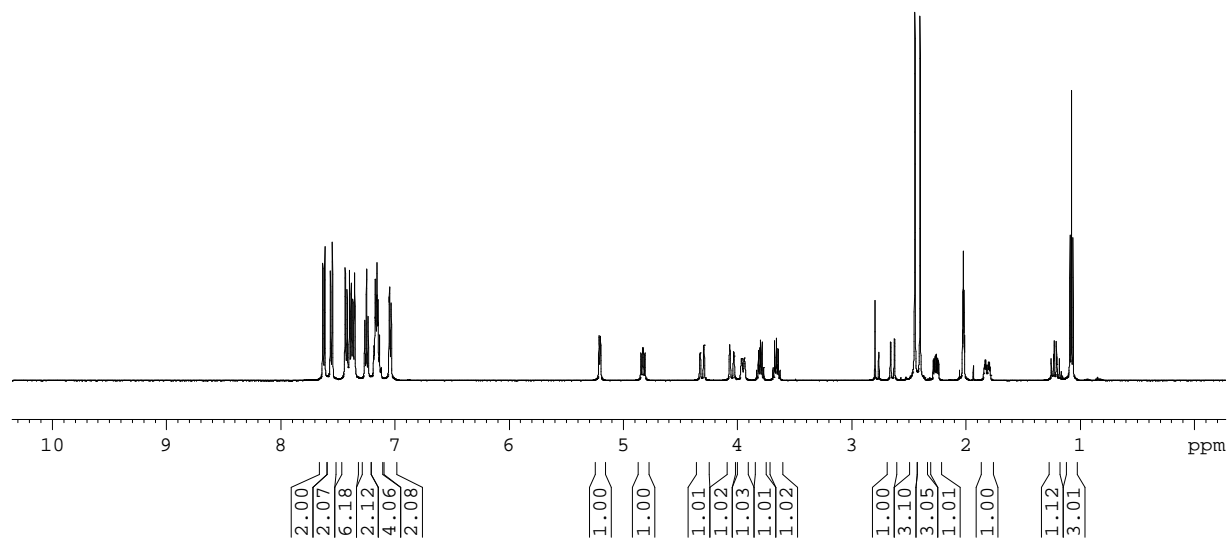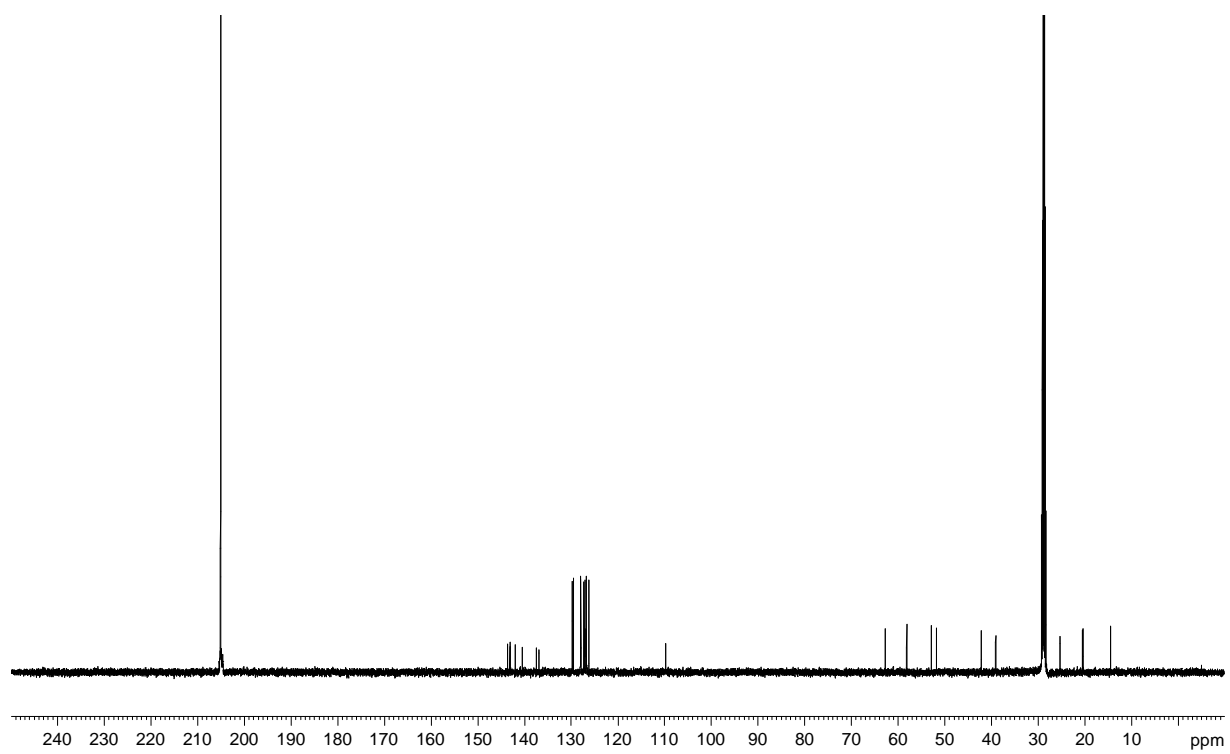

Wang *et al.*

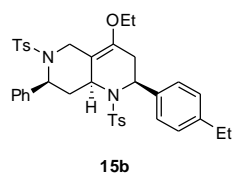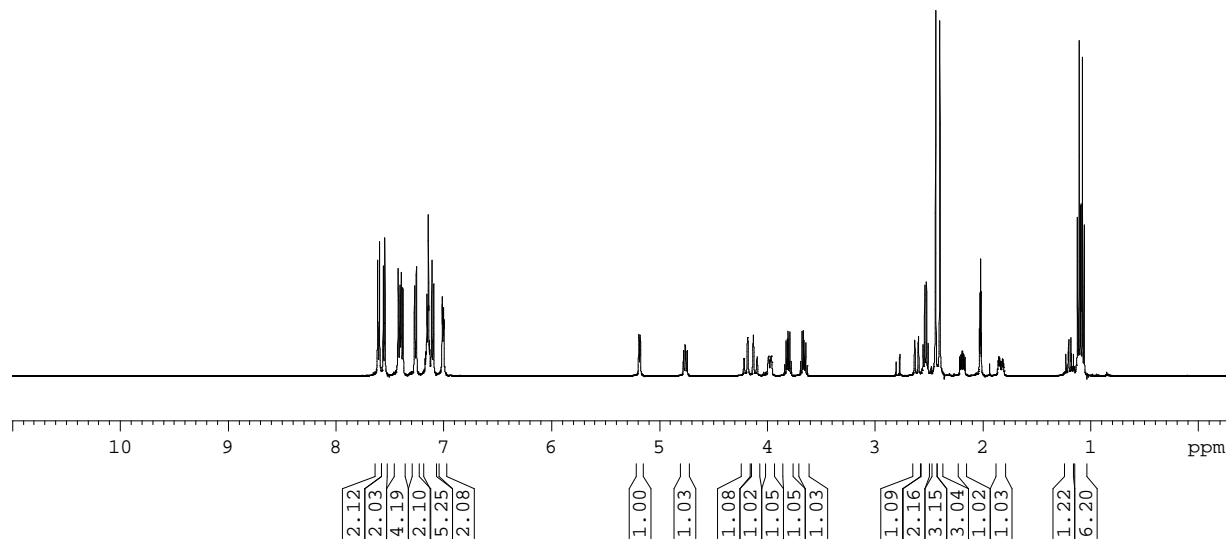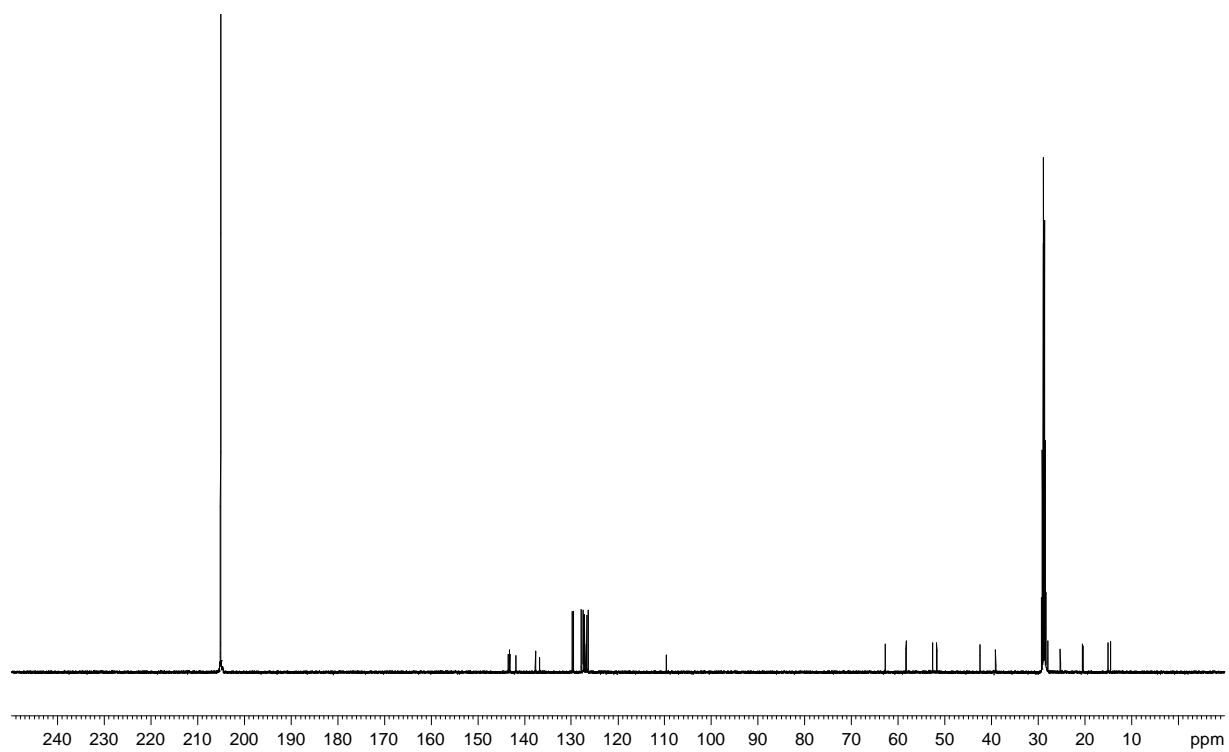

Wang *et al.*

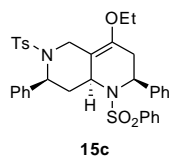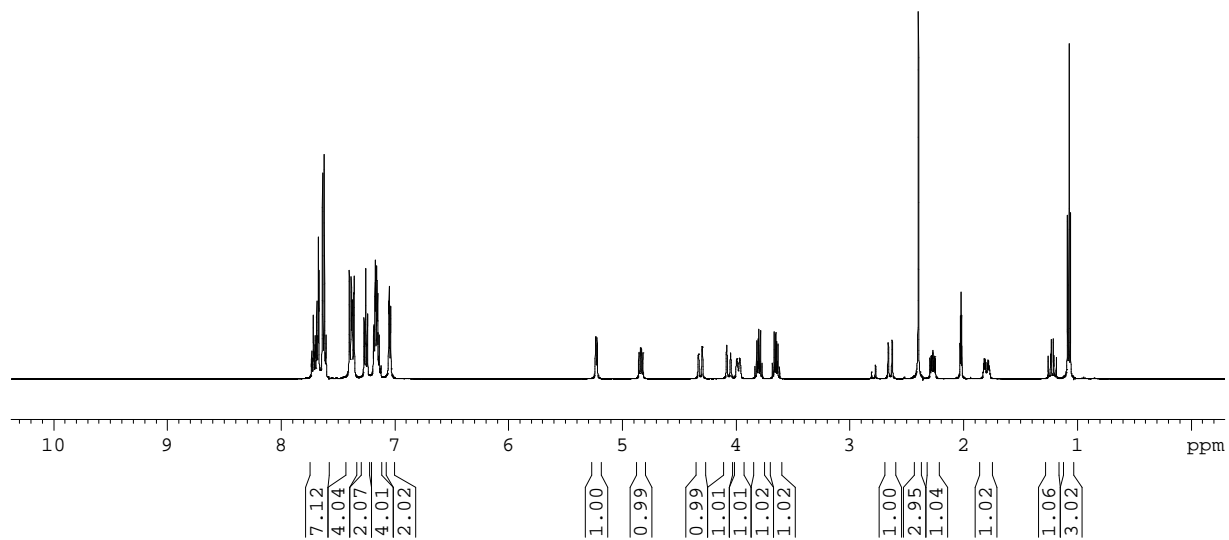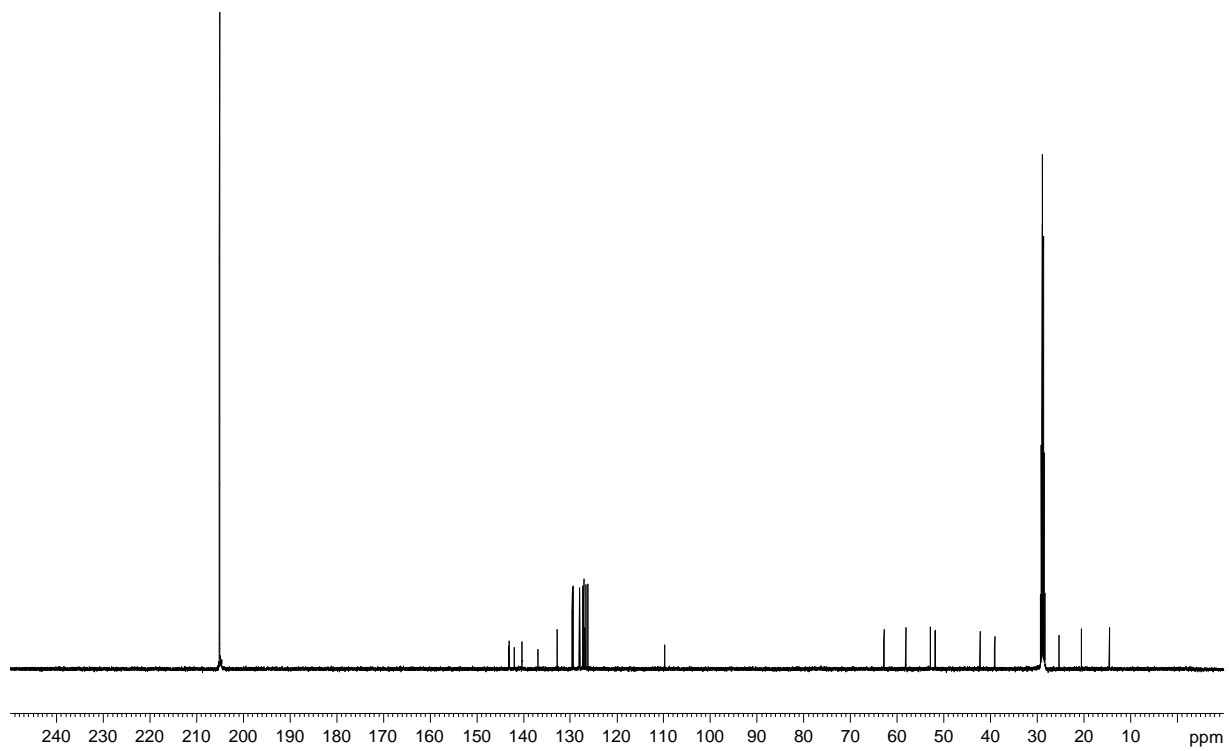

Wang *et al.*

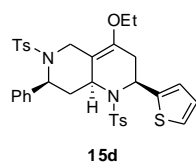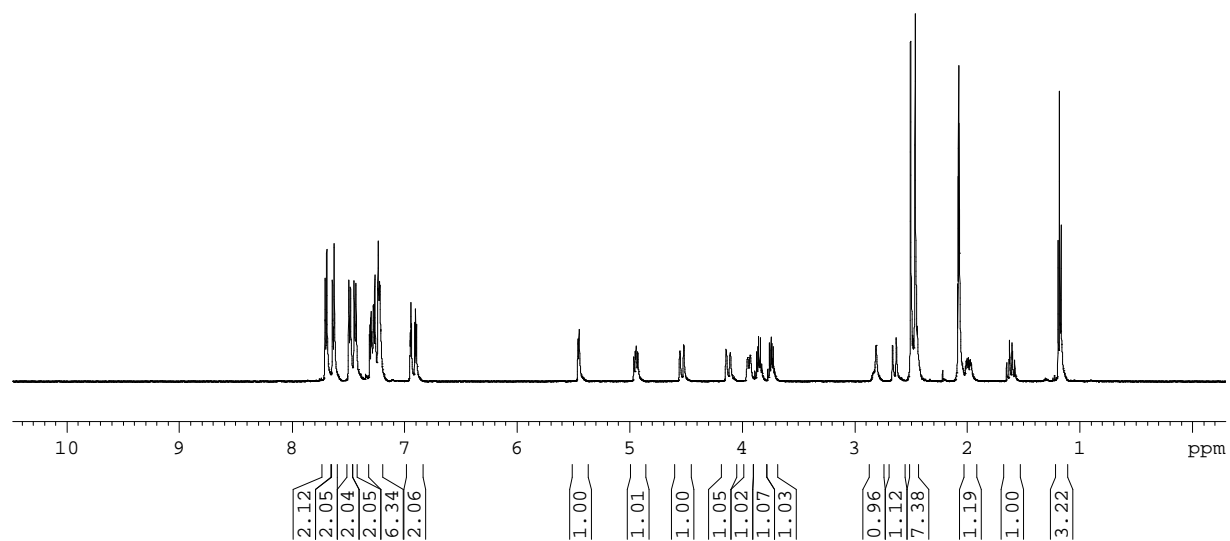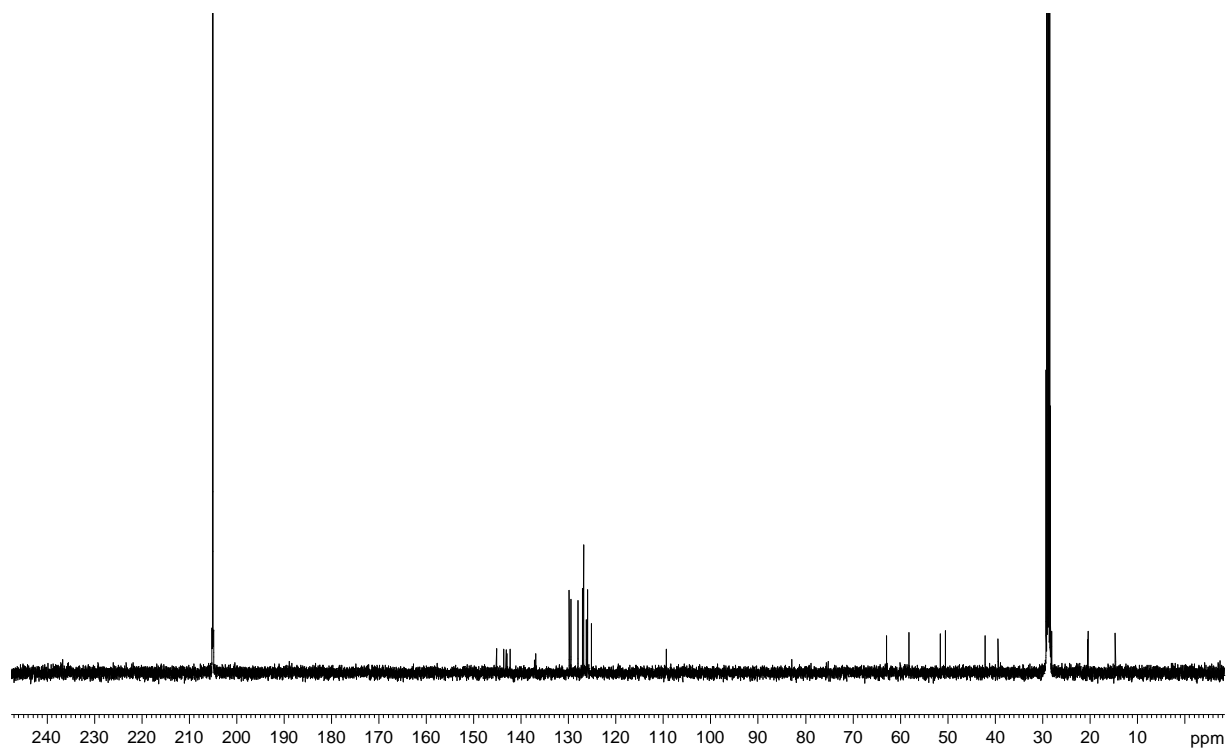

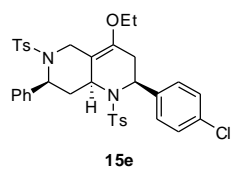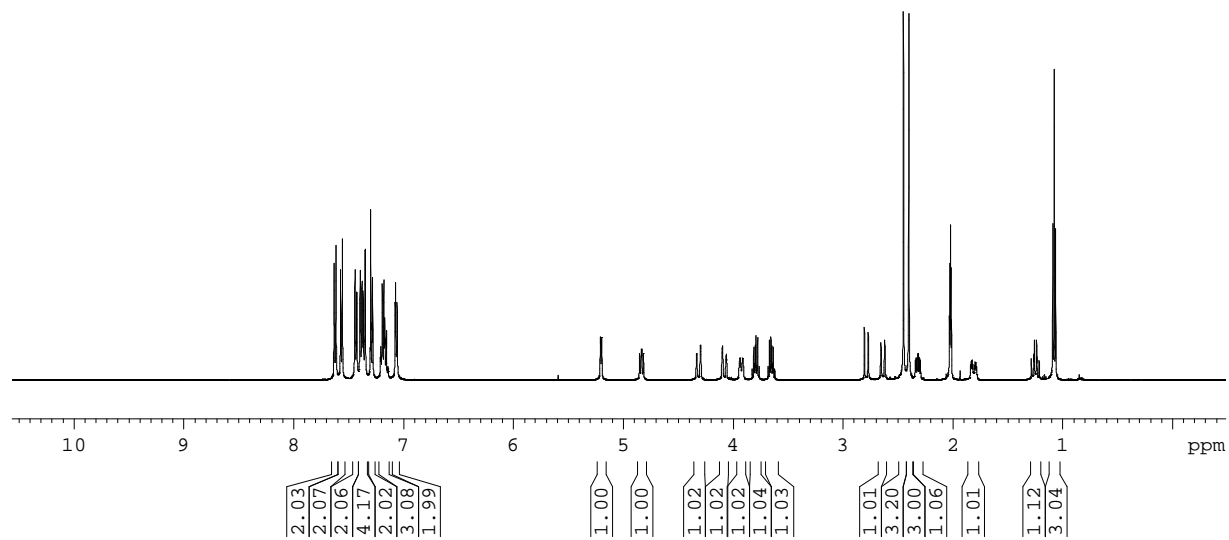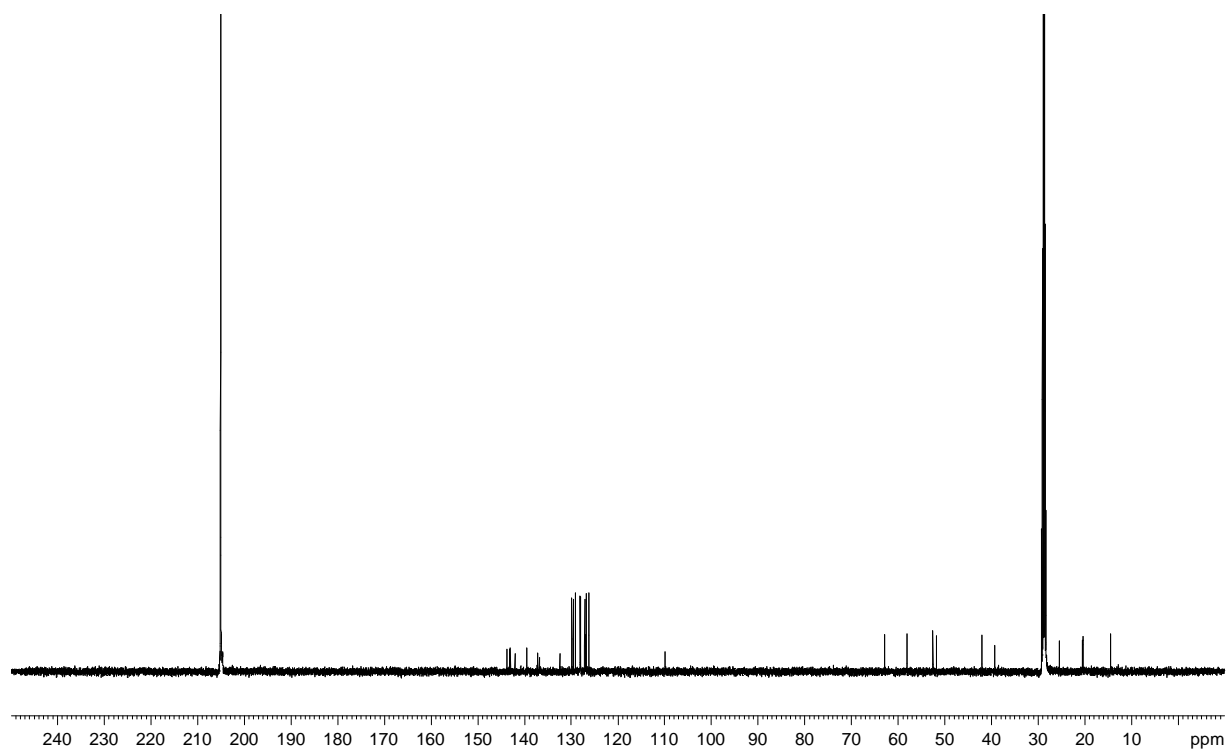

Wang *et al.*

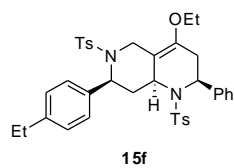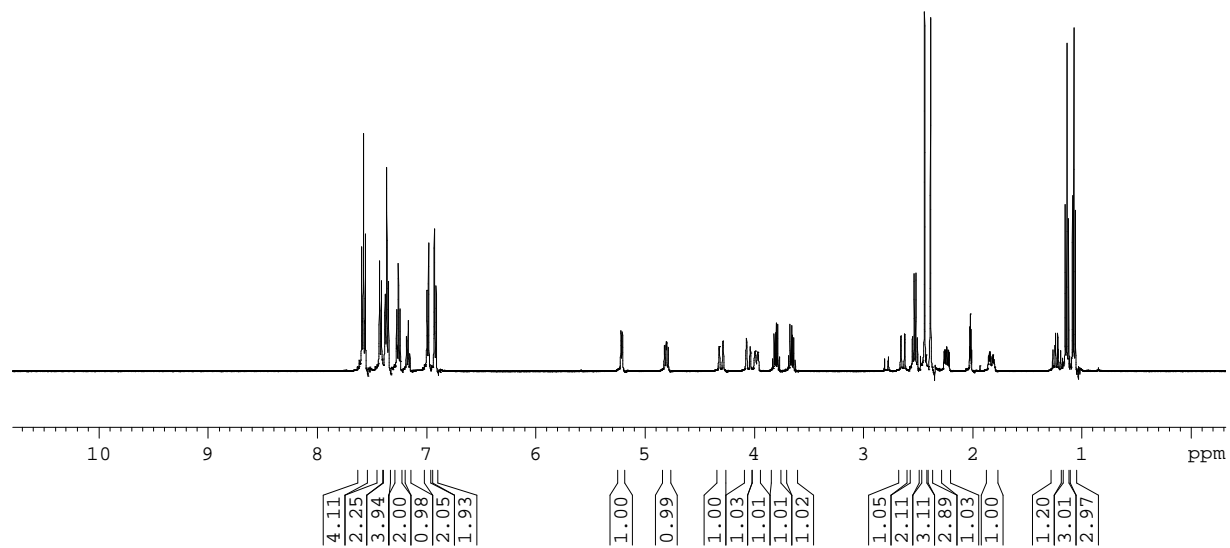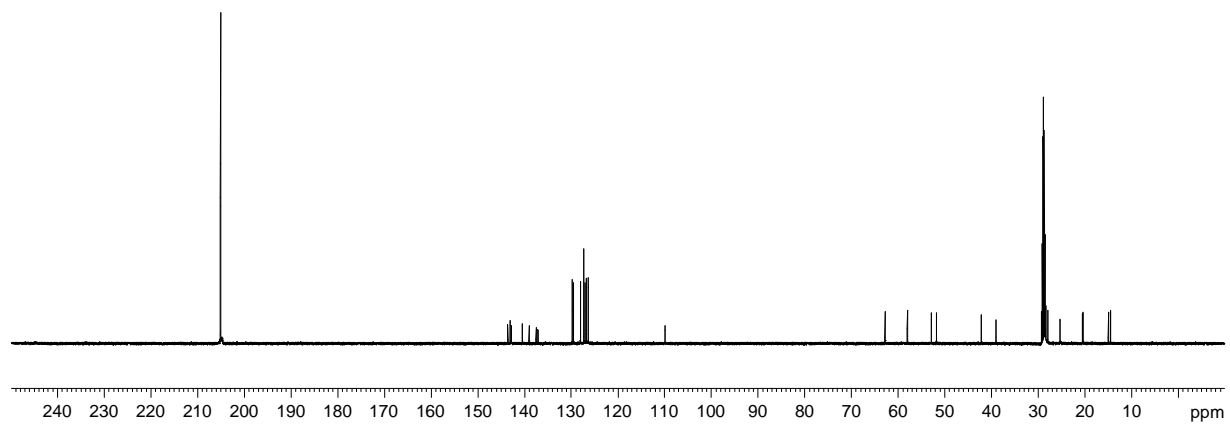



Wang *et al.*

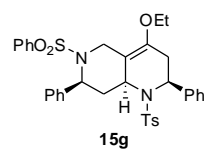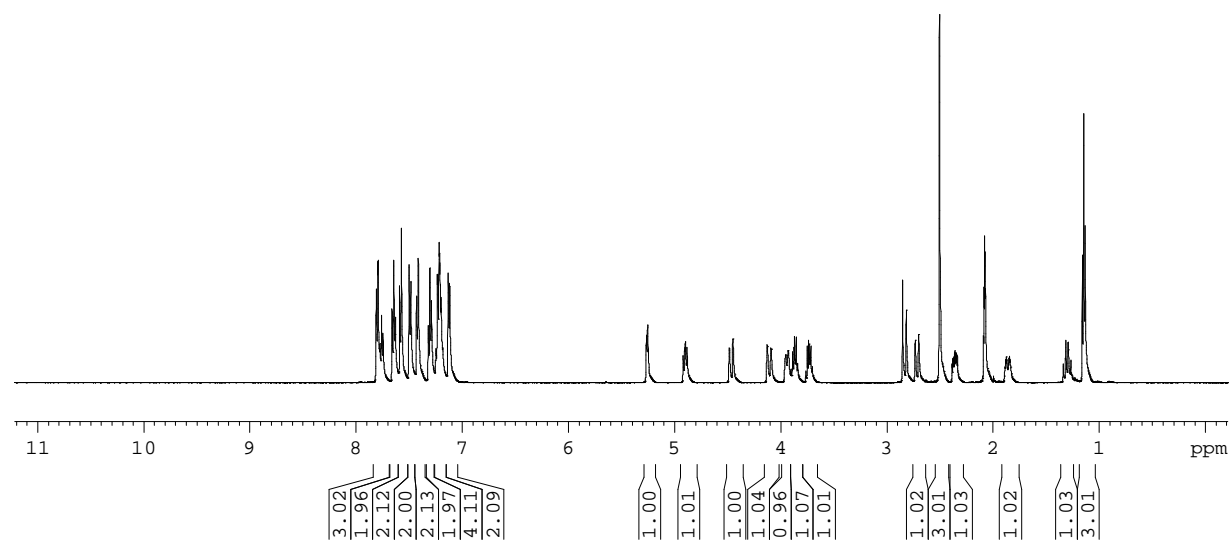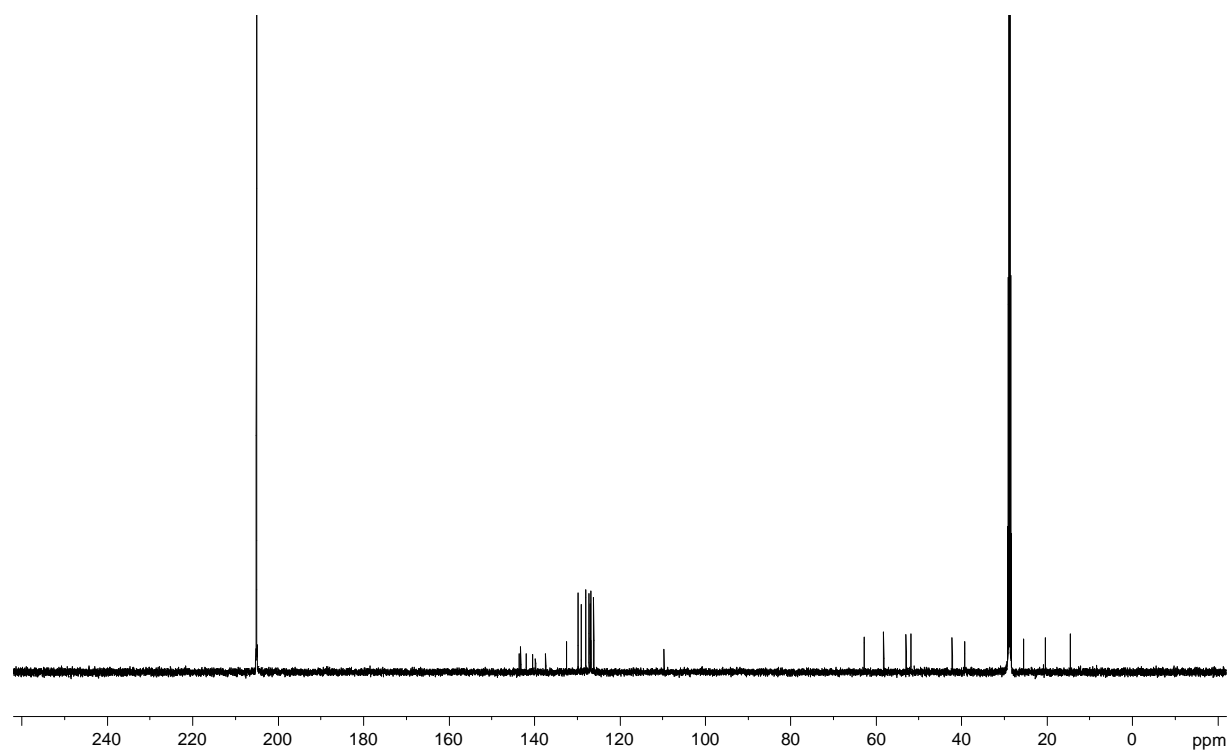

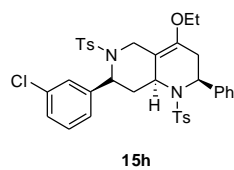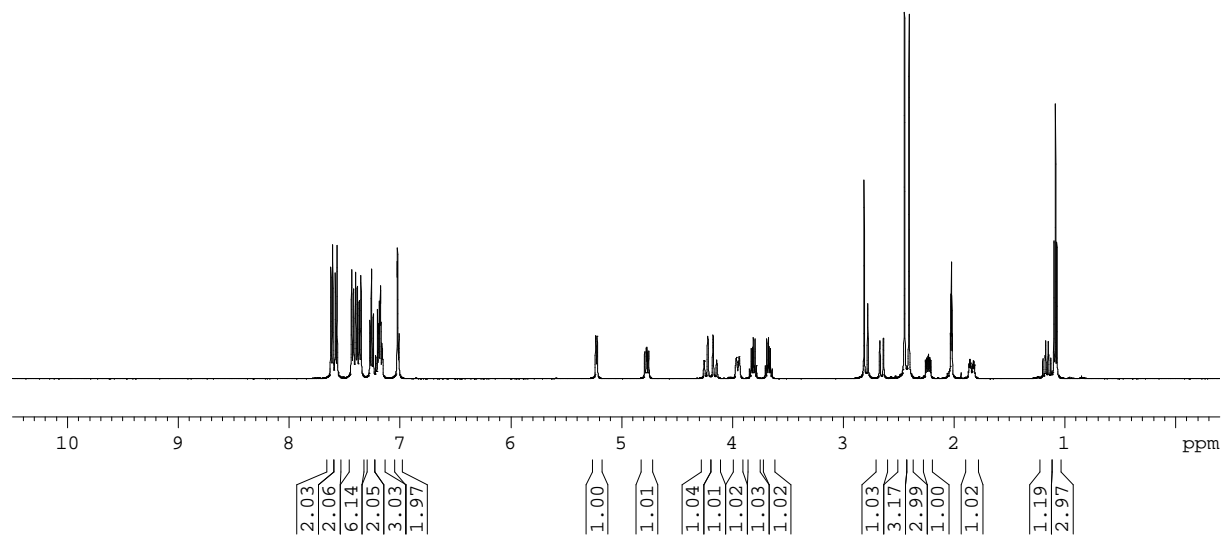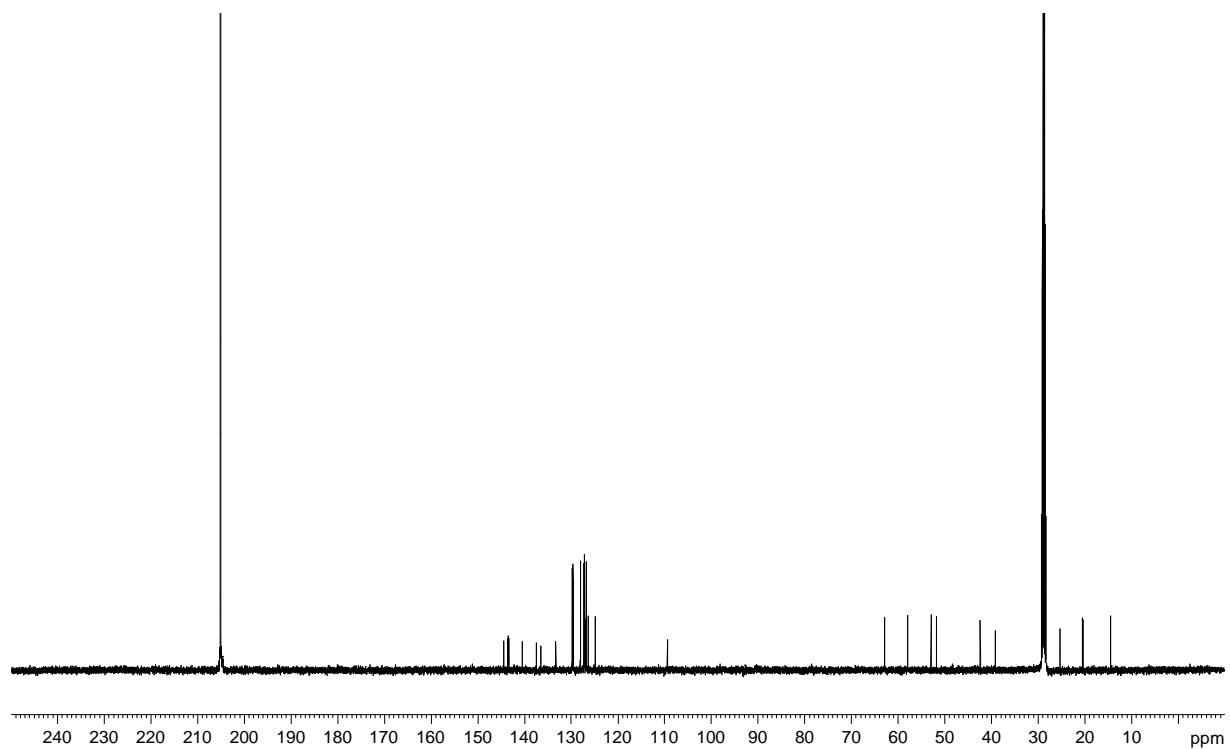

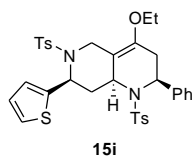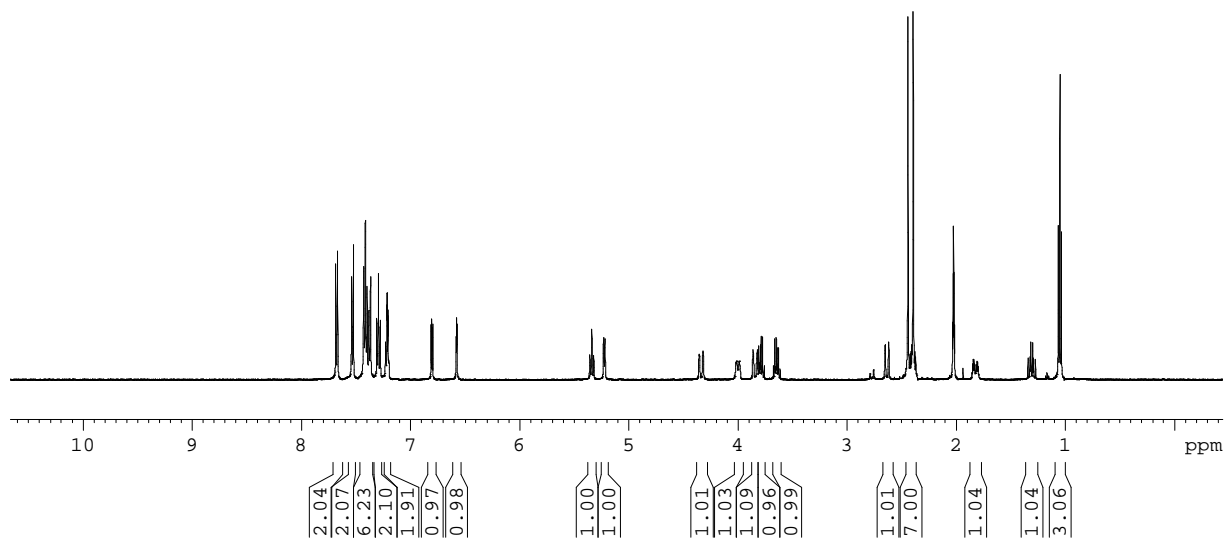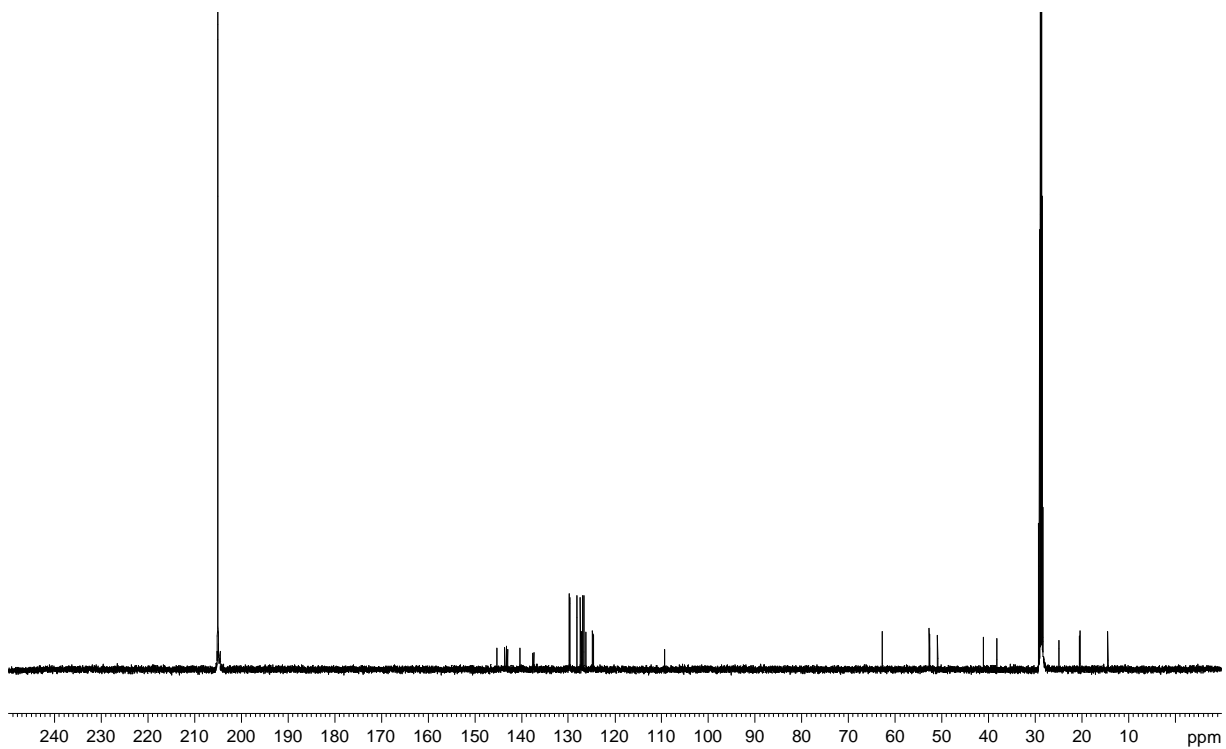

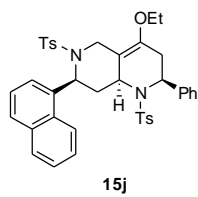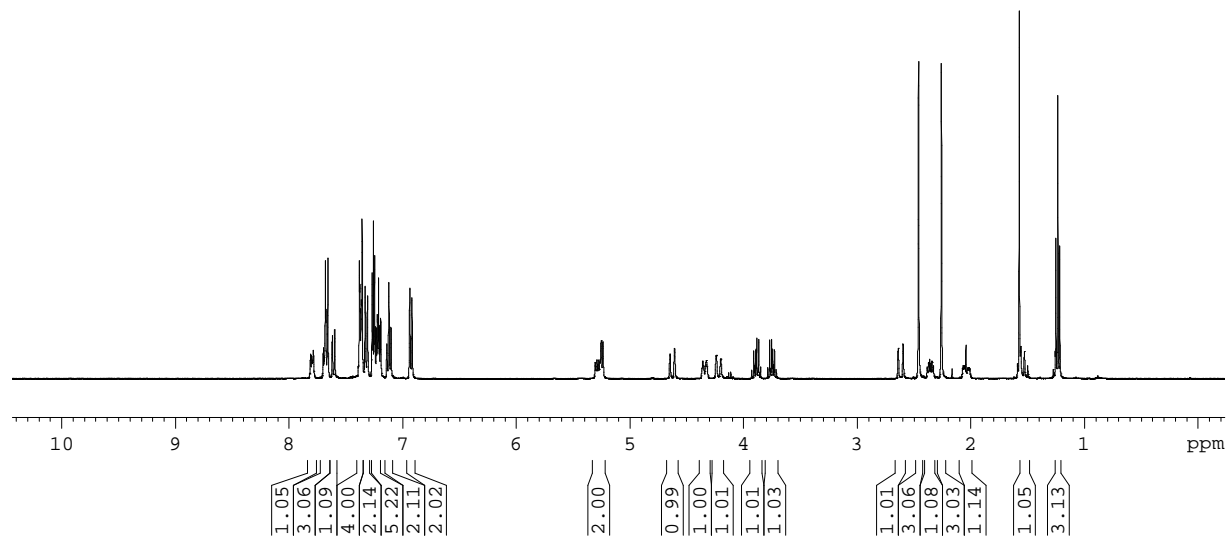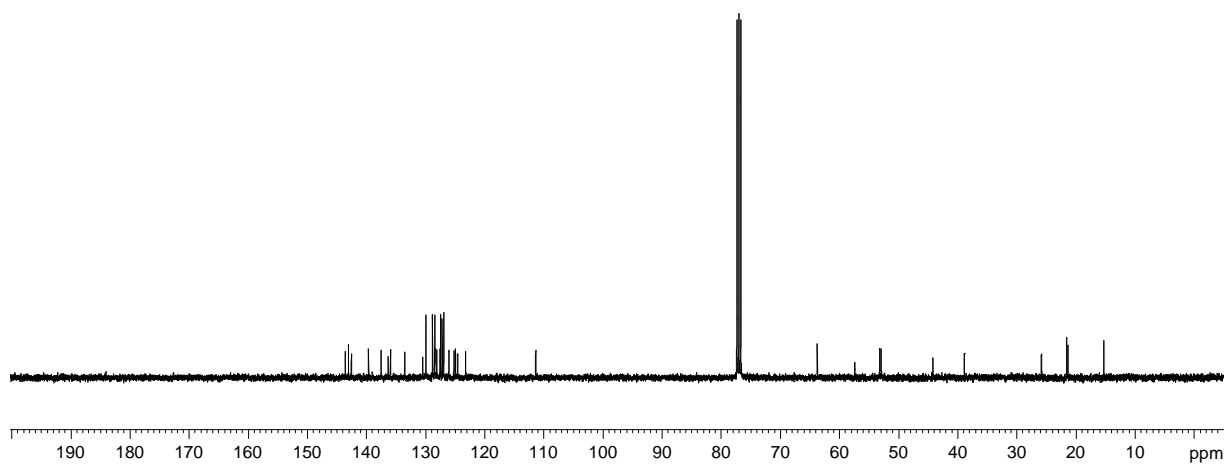

Wang *et al.*

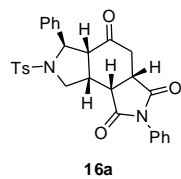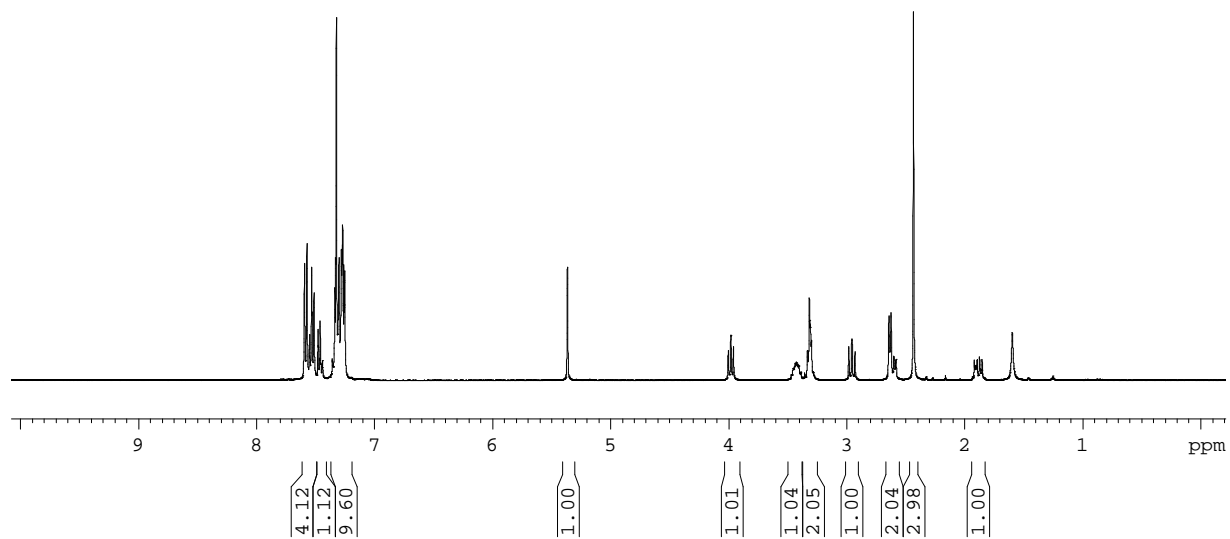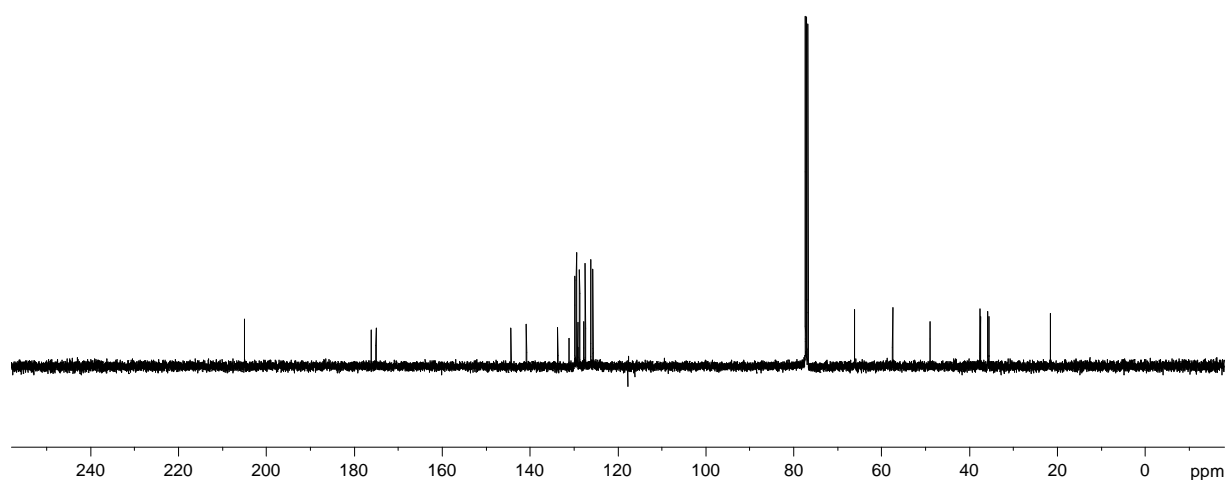

Wang *et al.*

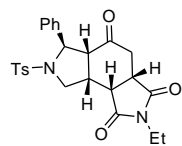

16b

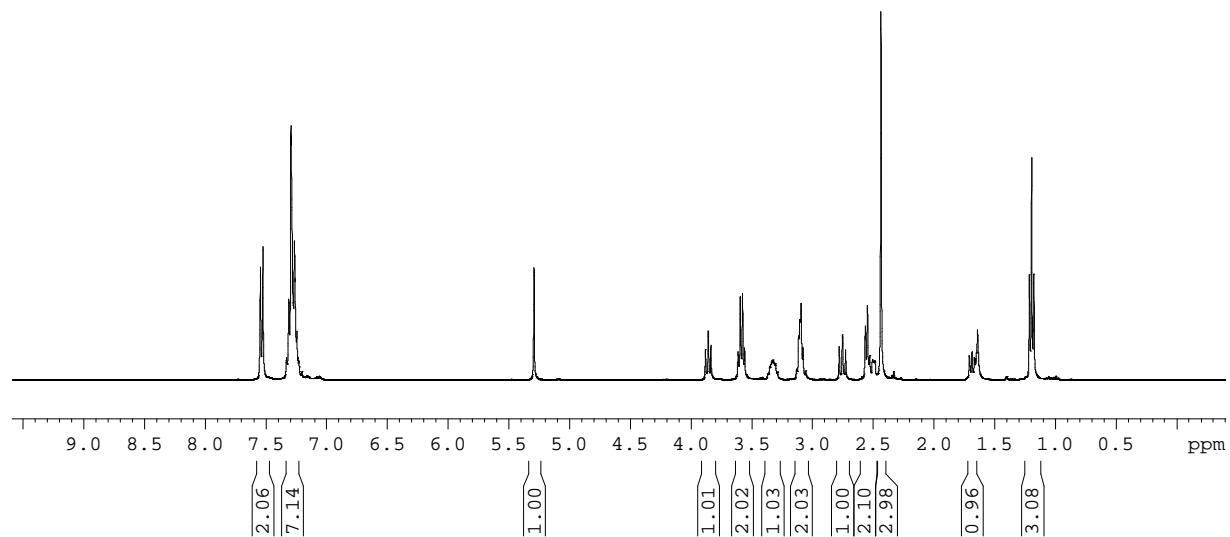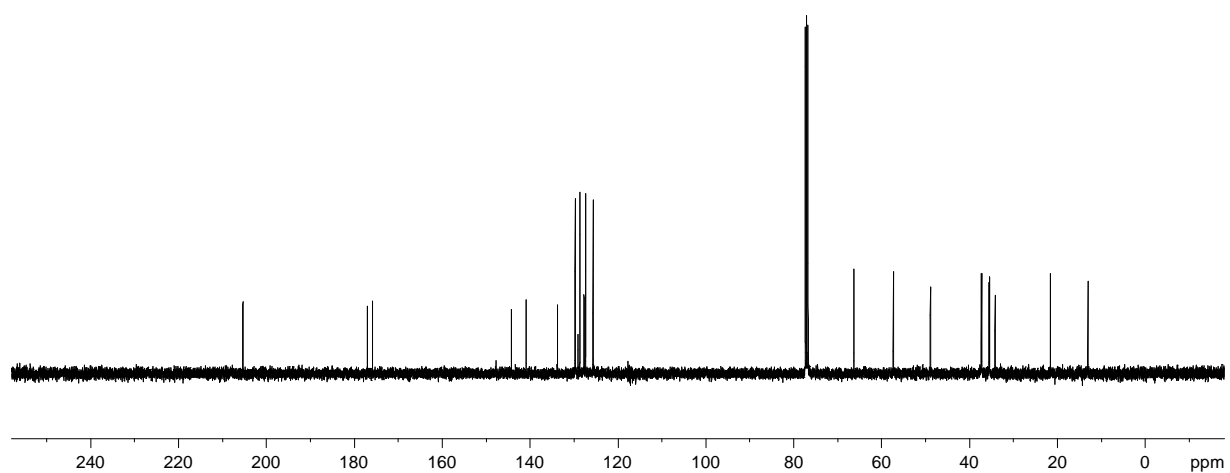

Wang *et al.*

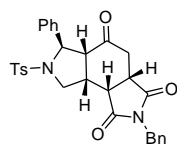

**16c**

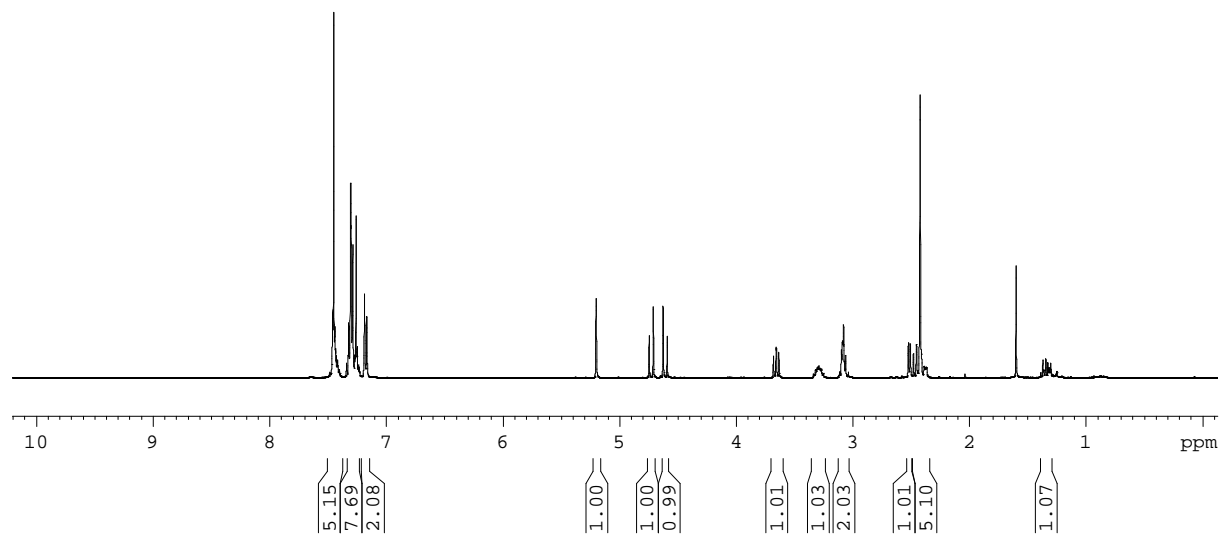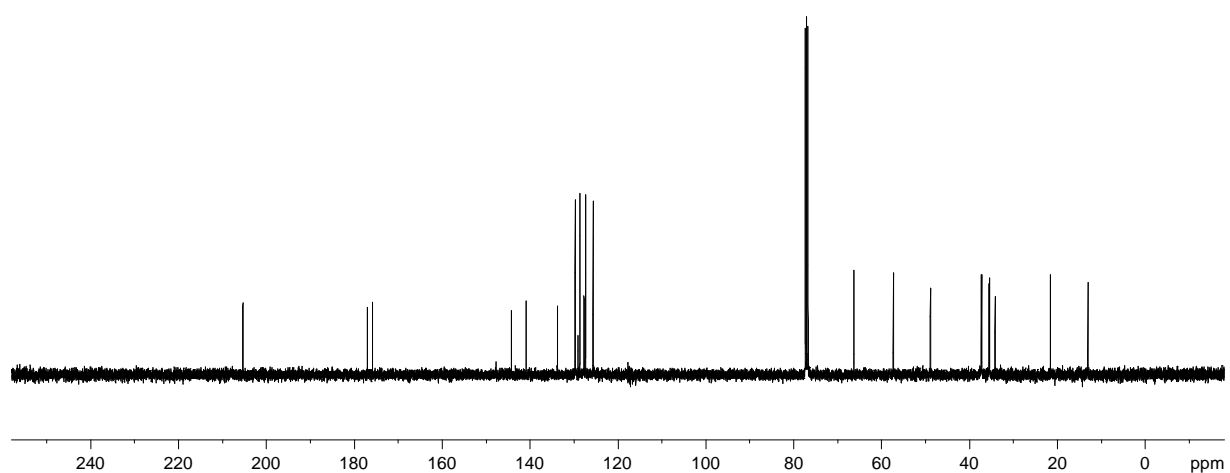

Wang *et al.*

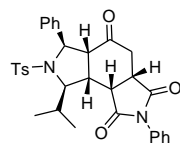

**16d**

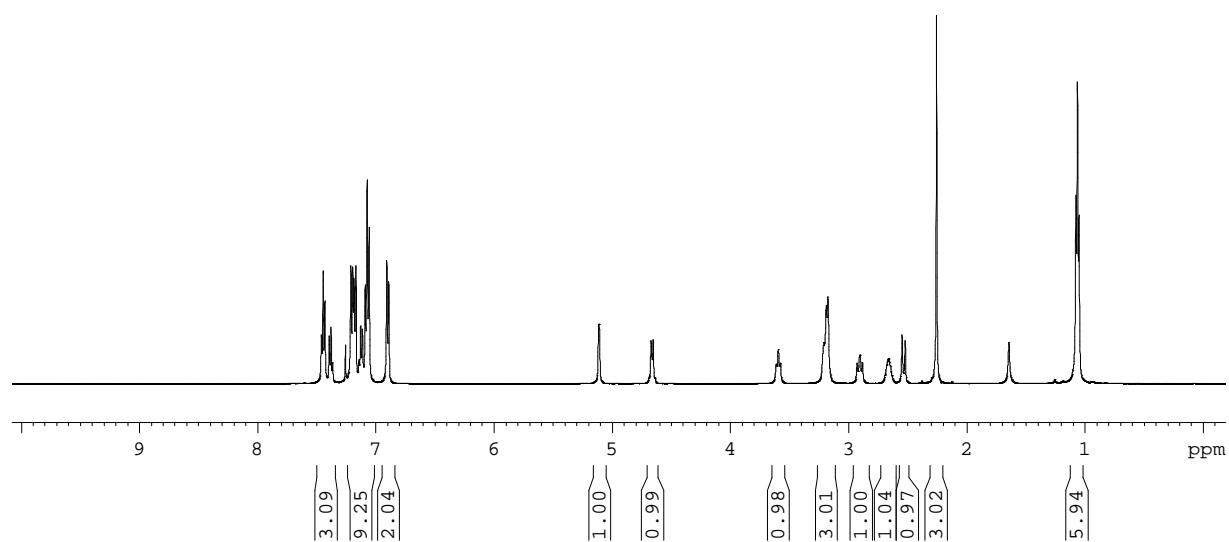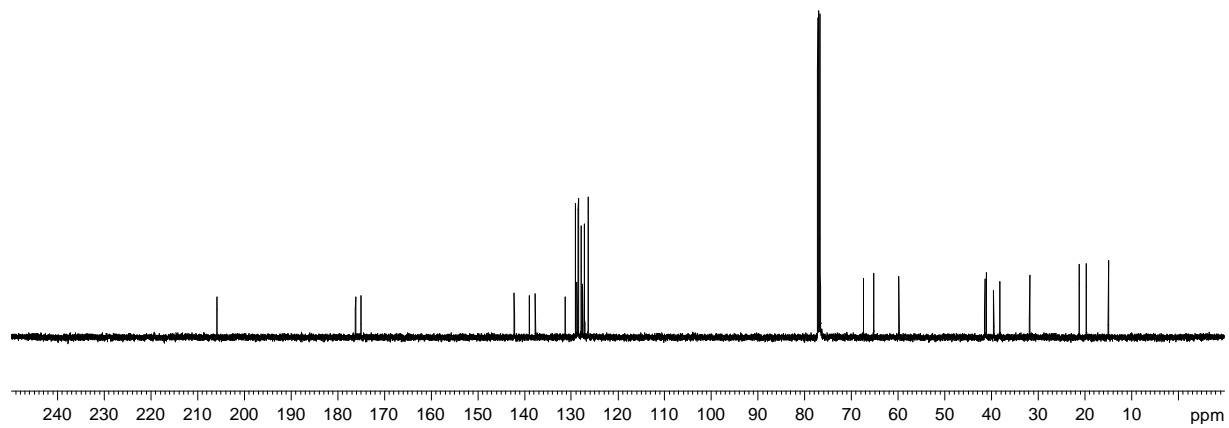



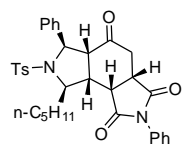

**16e**

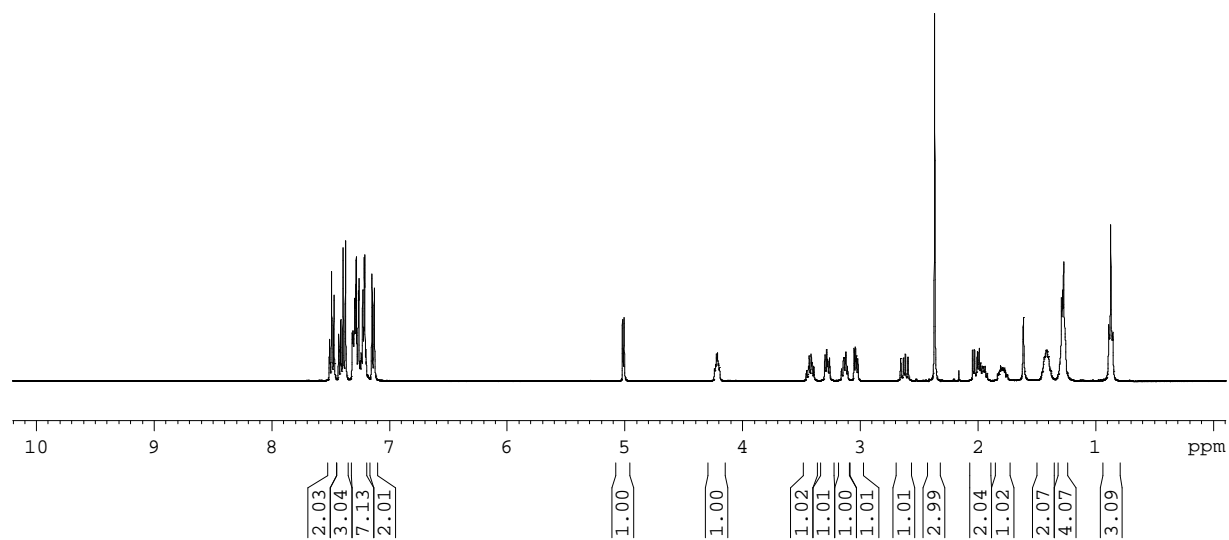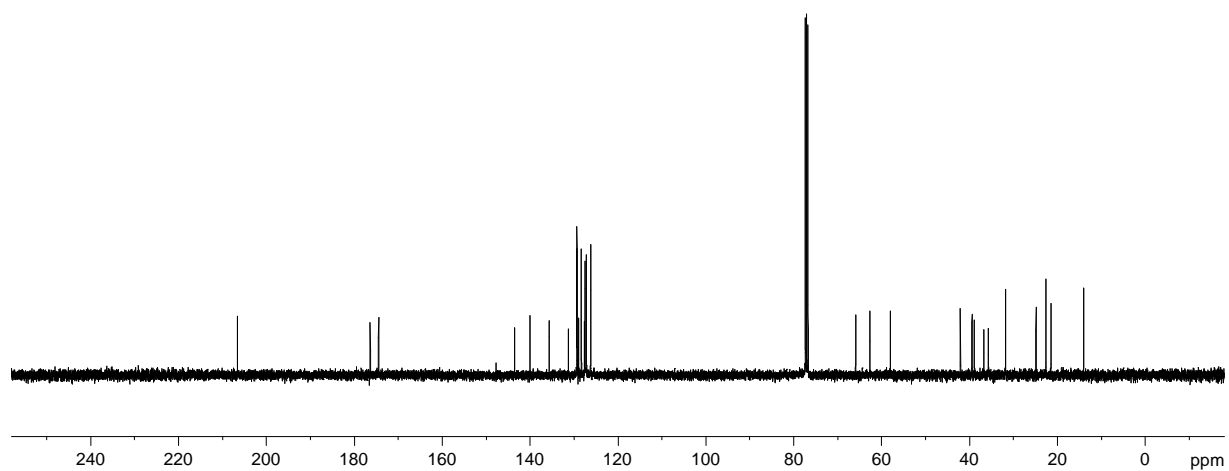

Wang *et al.*

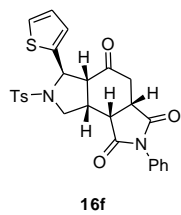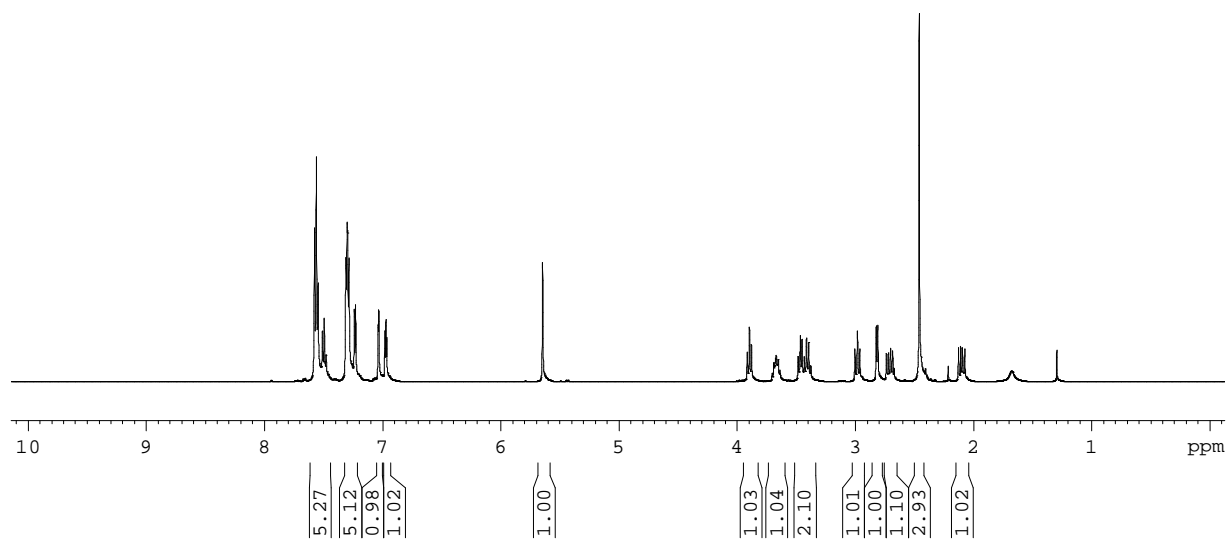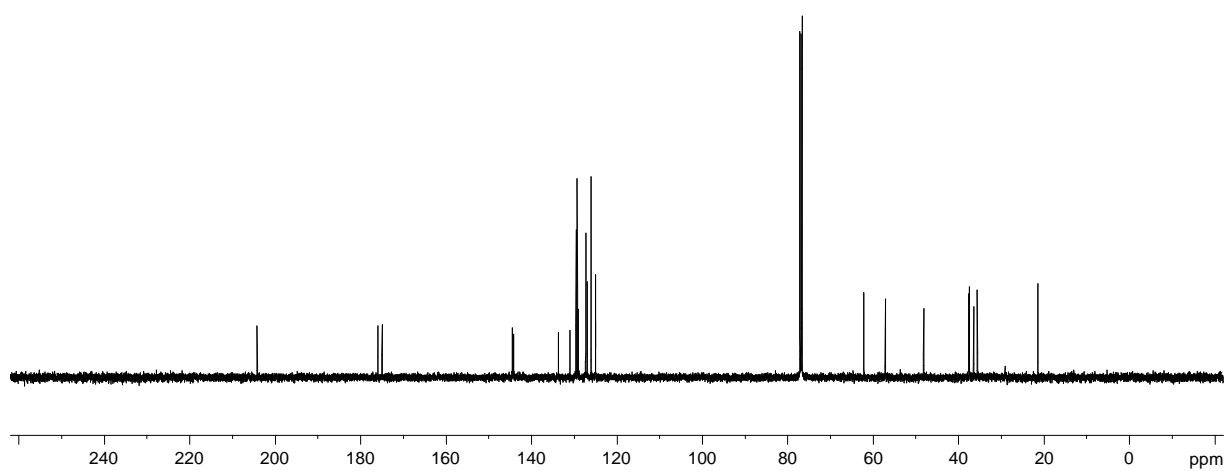

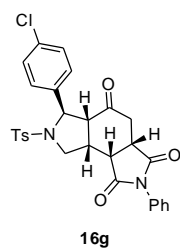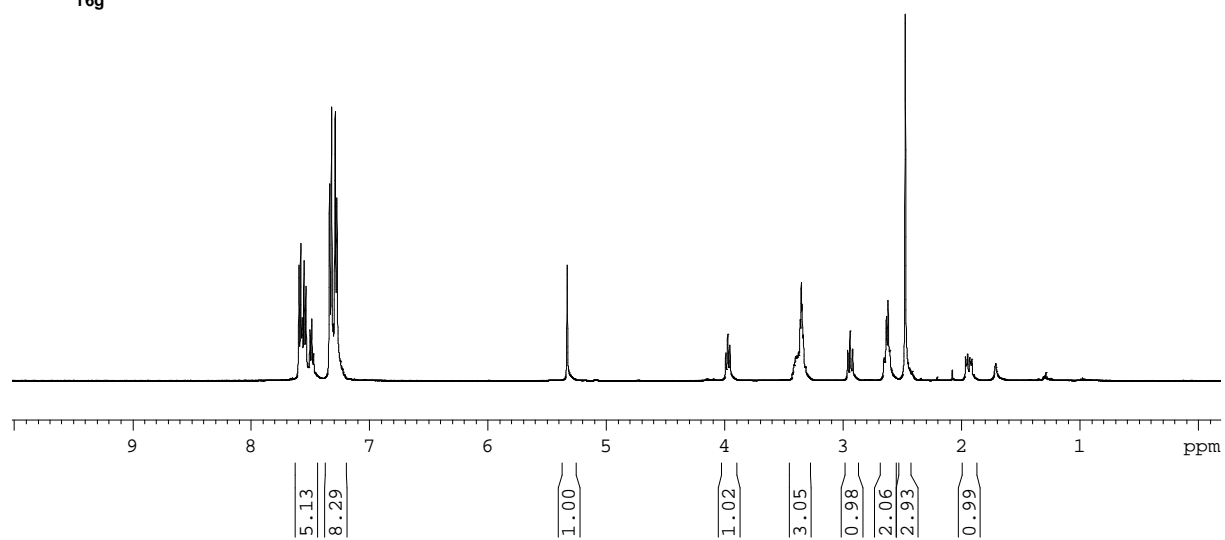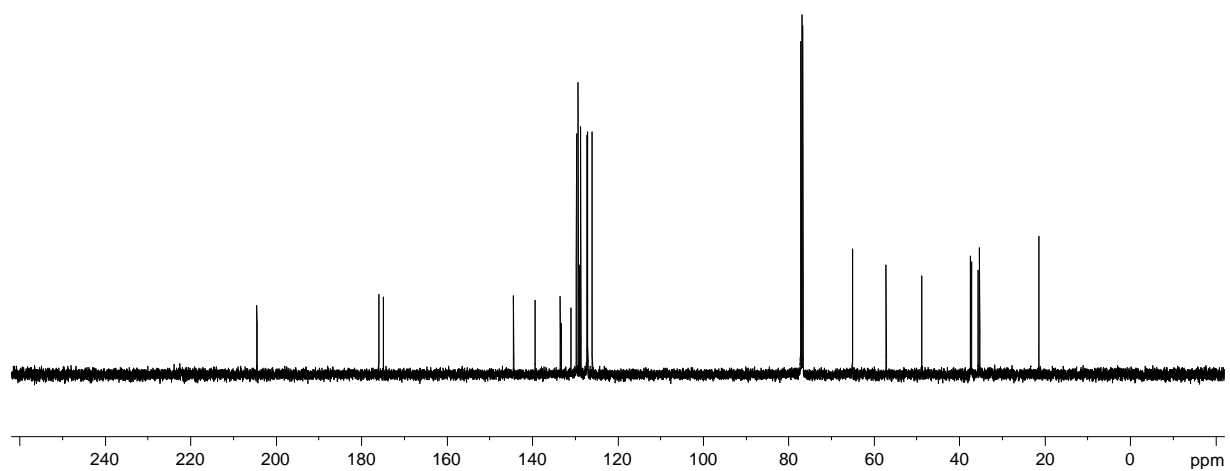

Wang *et al.*

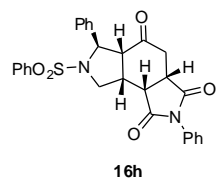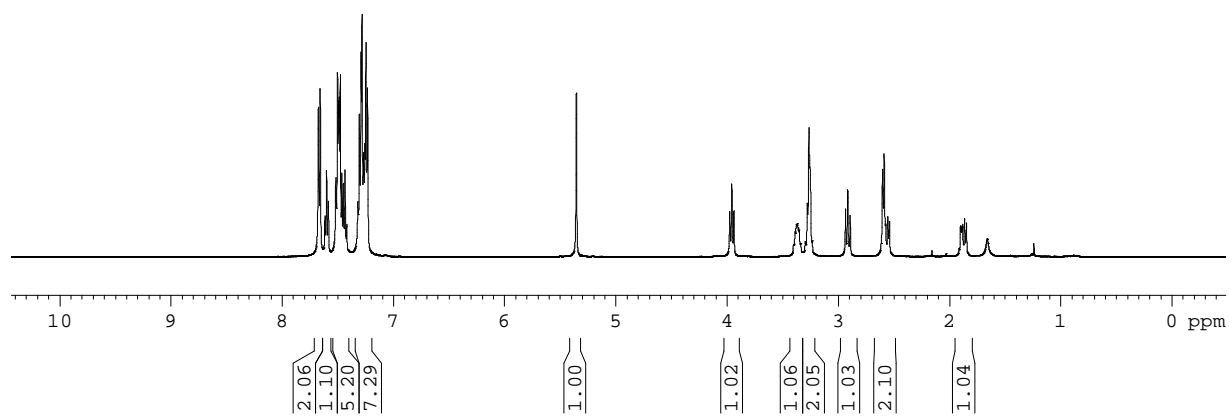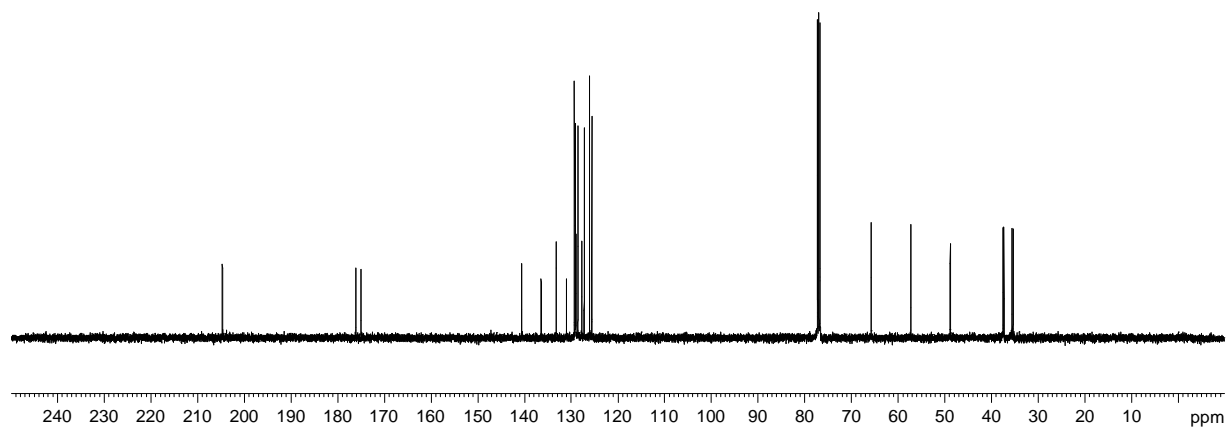

Wang *et al.*

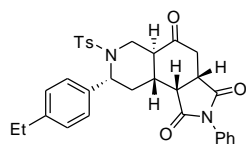

17a

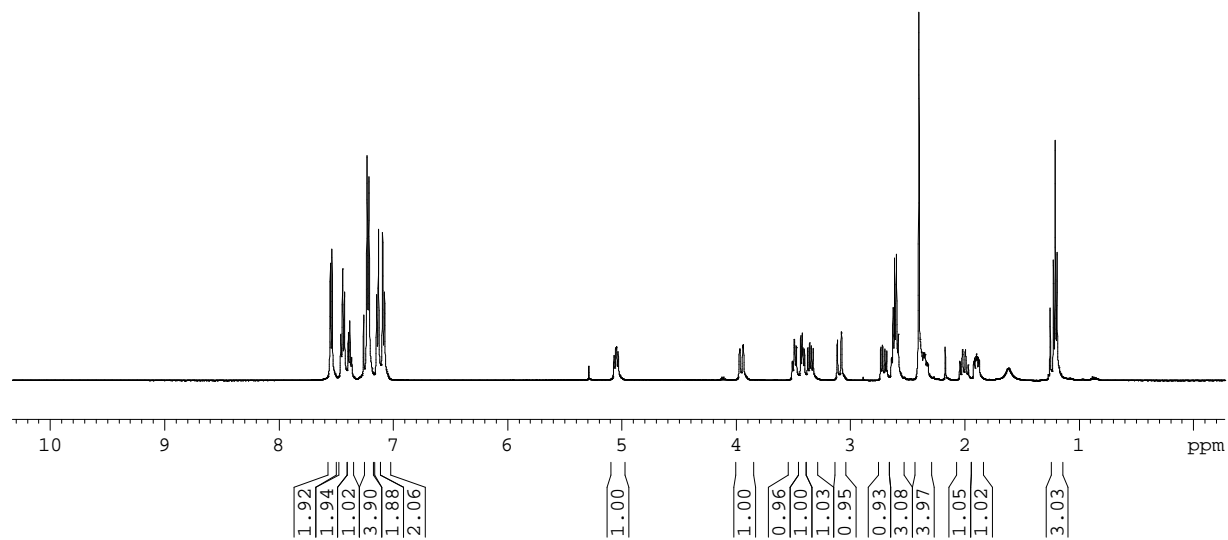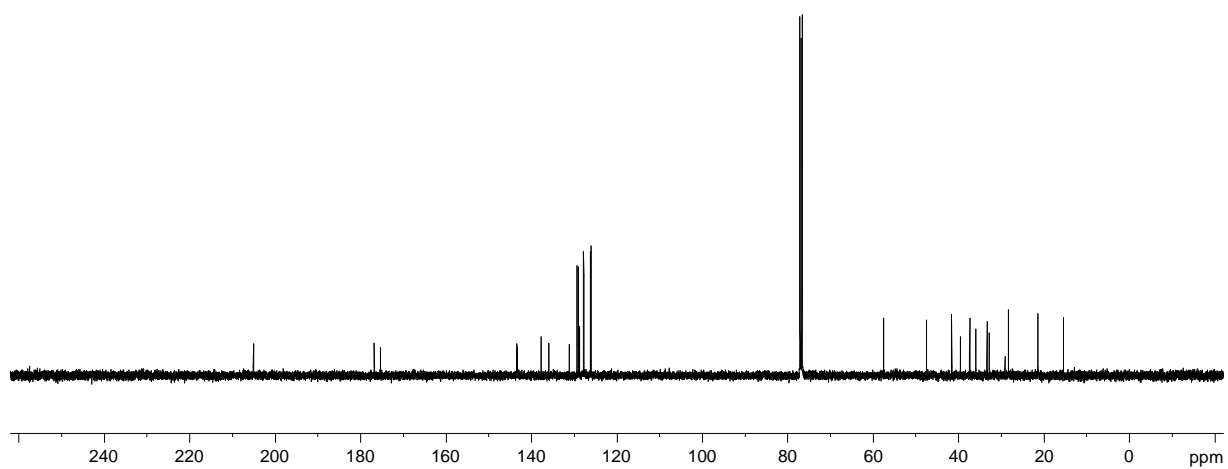

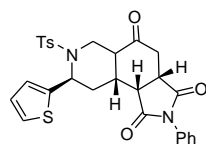

17b

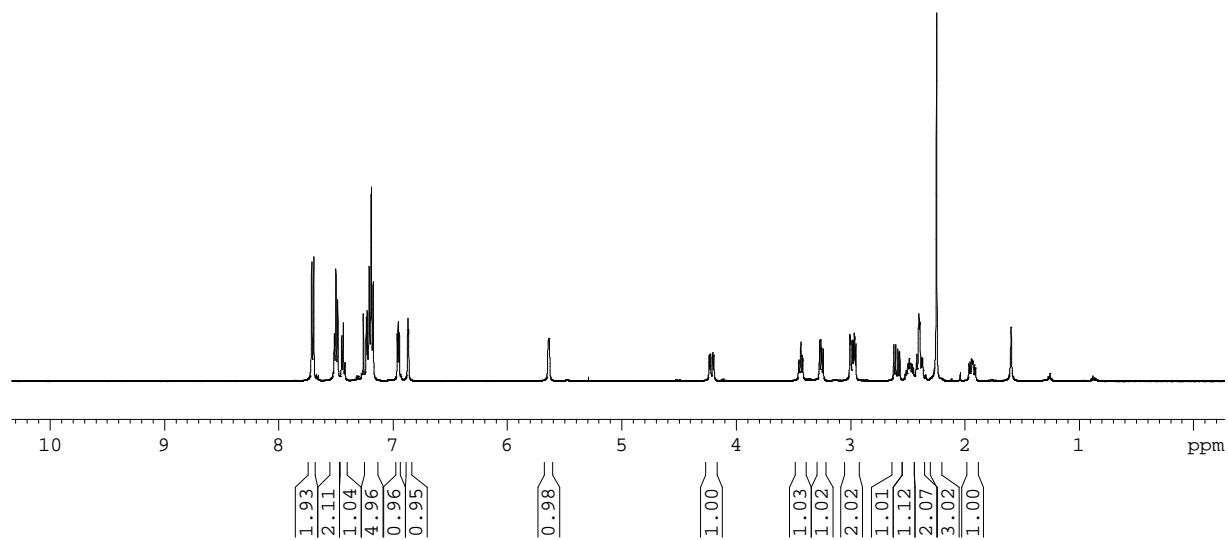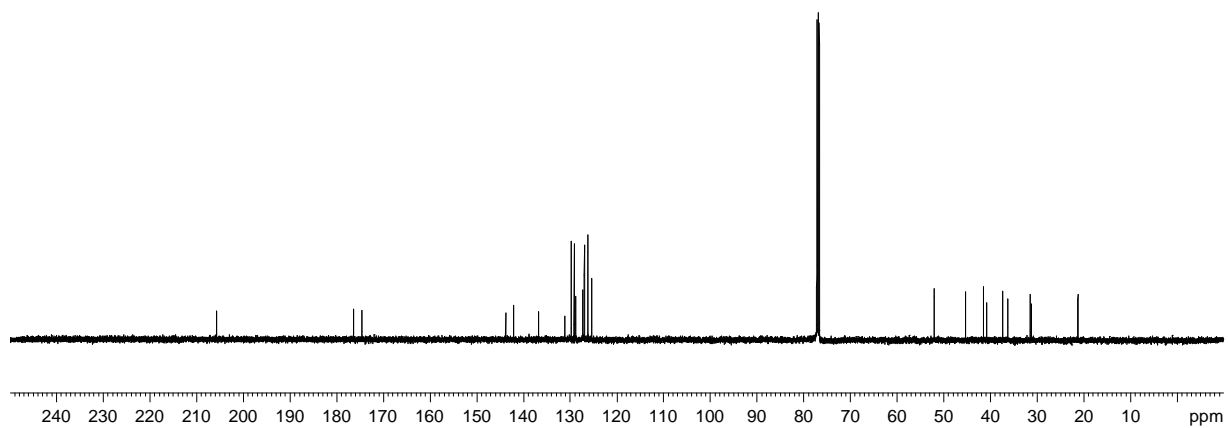

Wang *et al.*

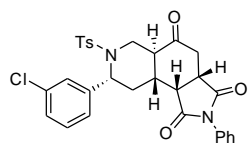

17ca

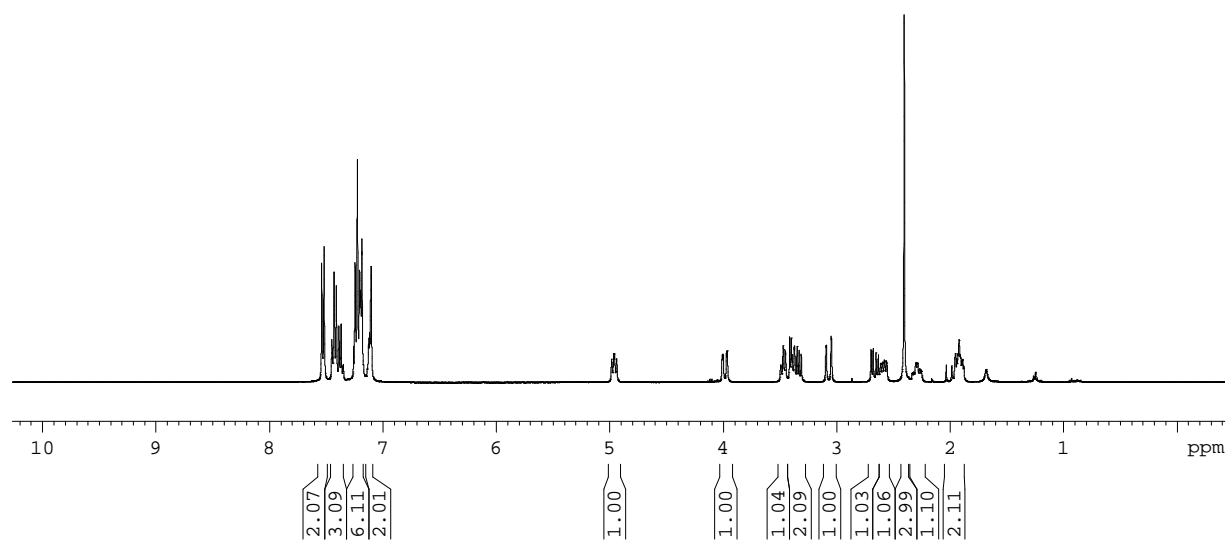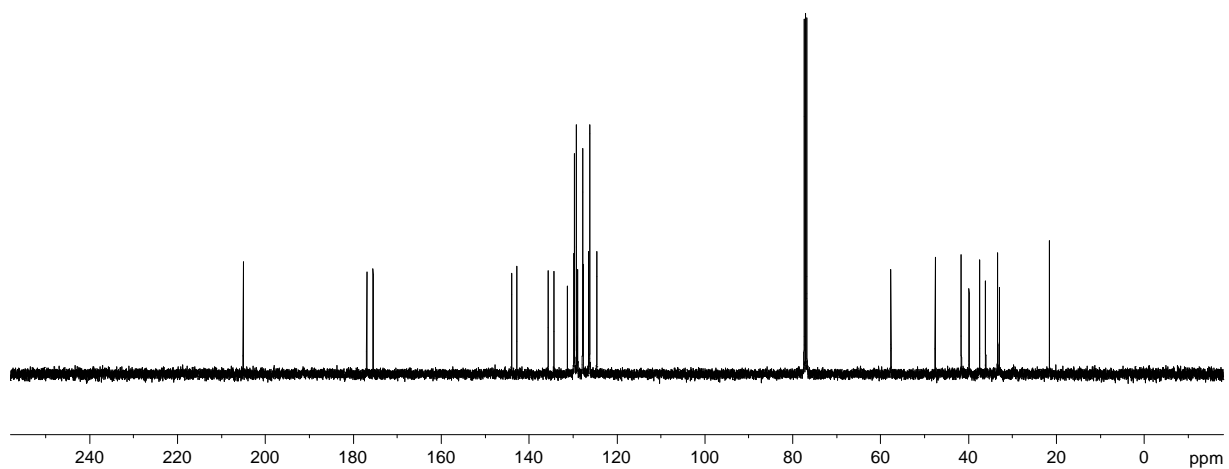

Wang *et al.*

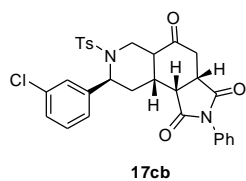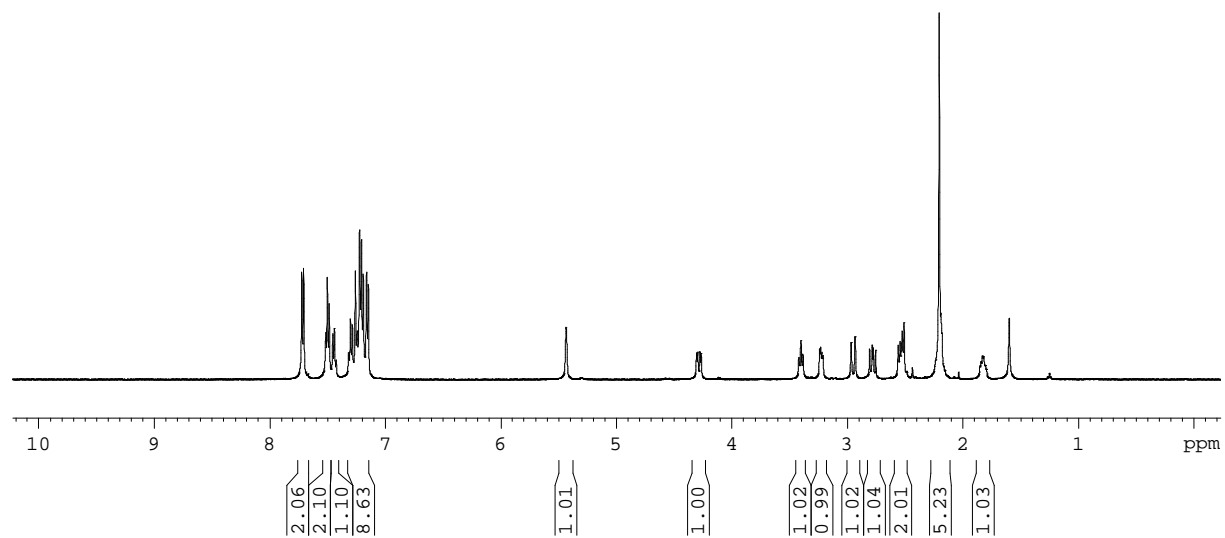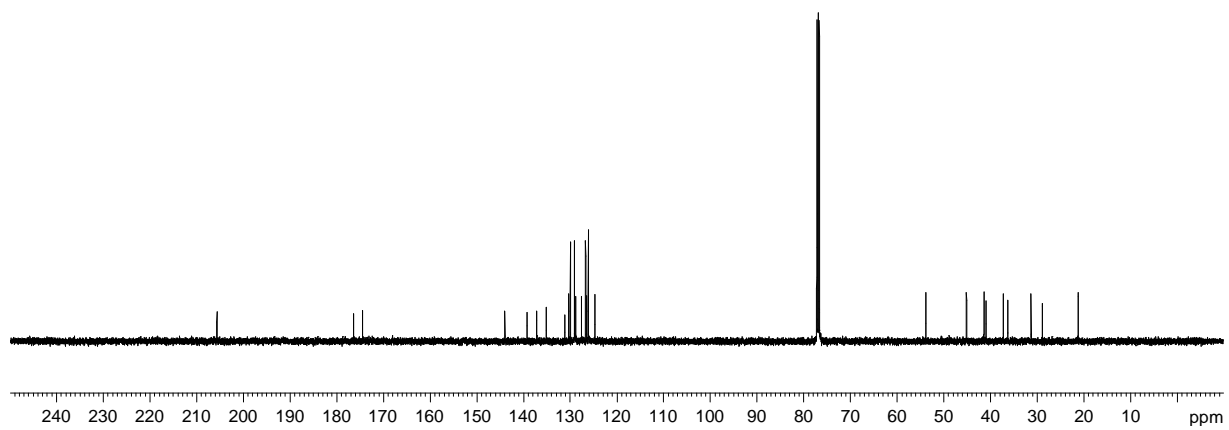



Wang *et al.*

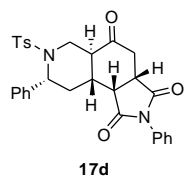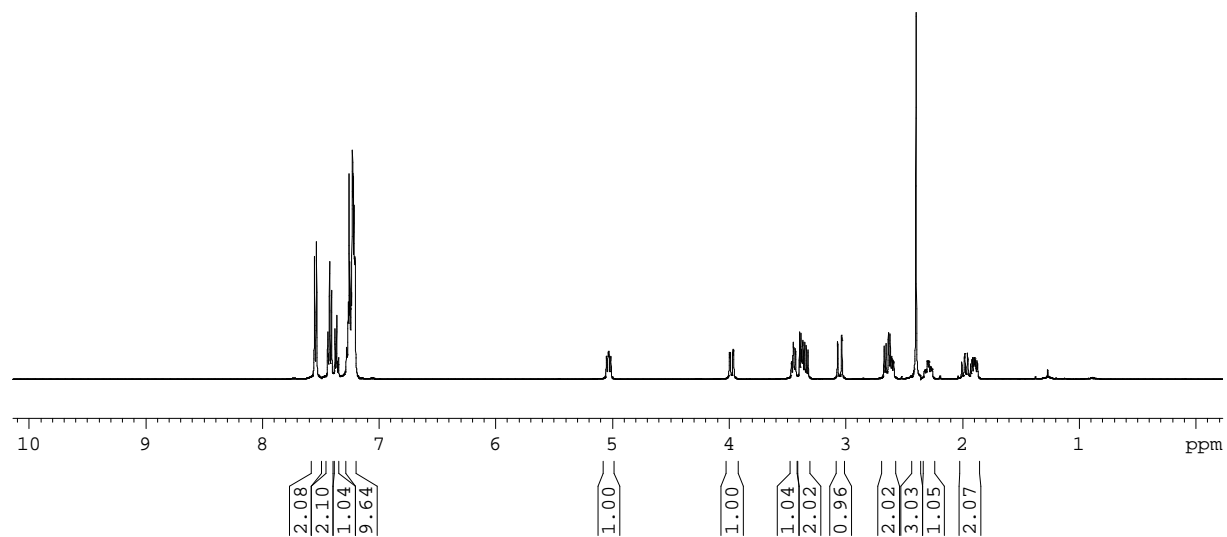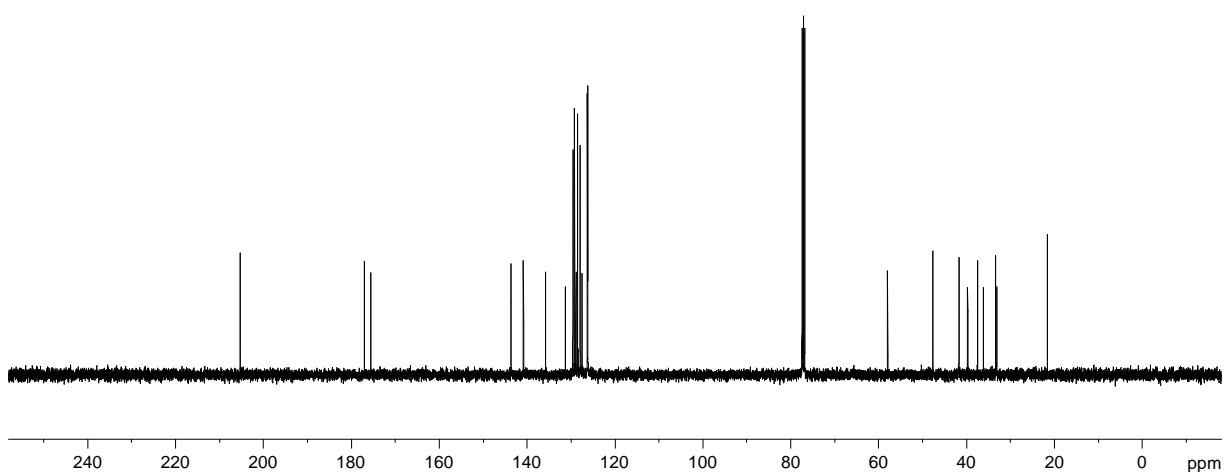

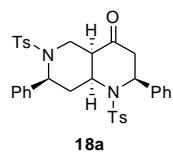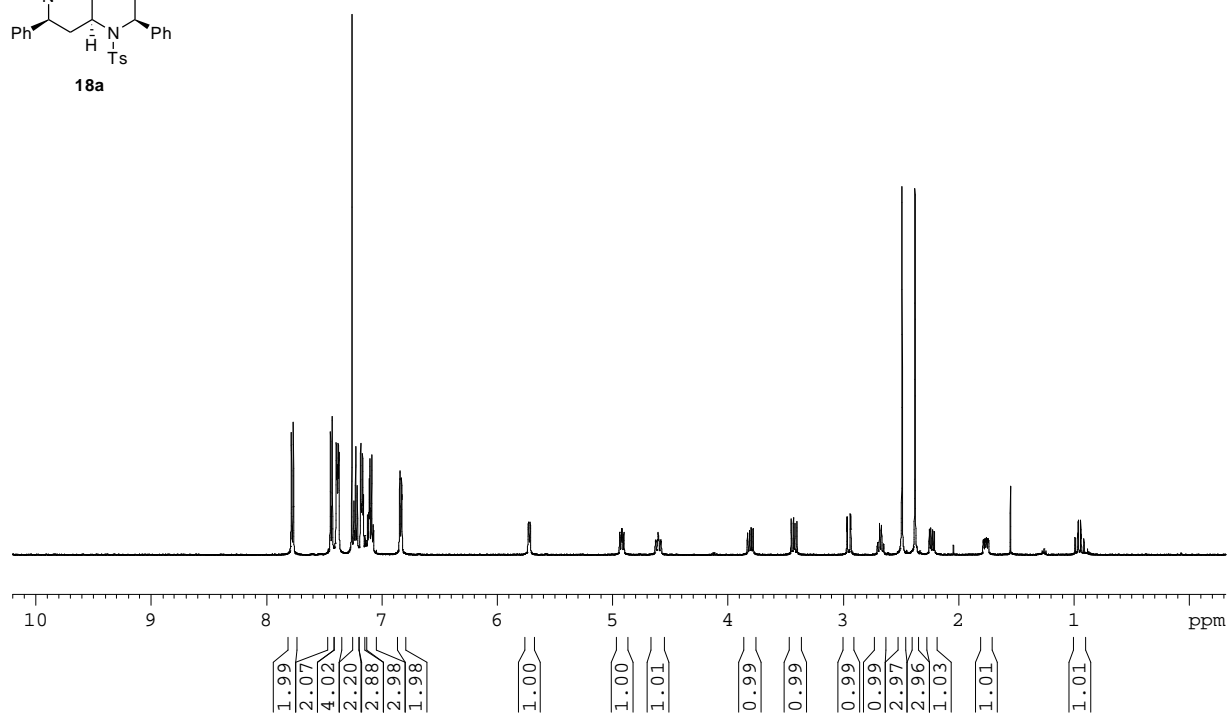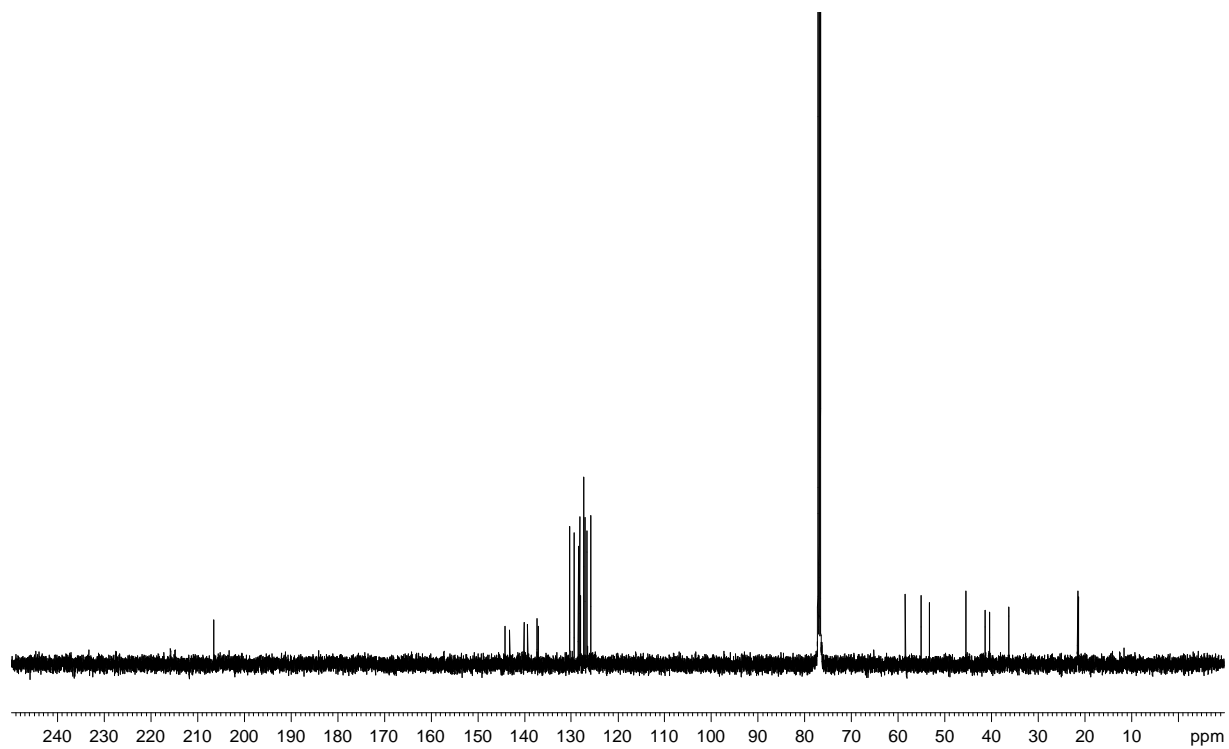

Wang *et al.*

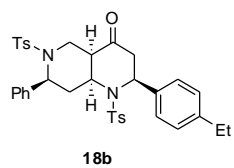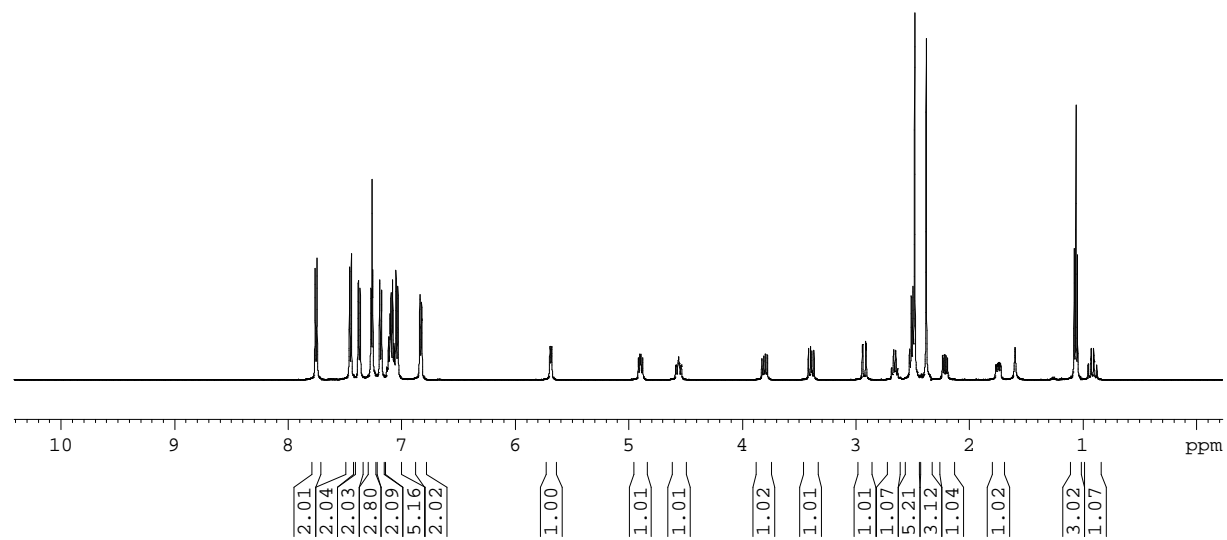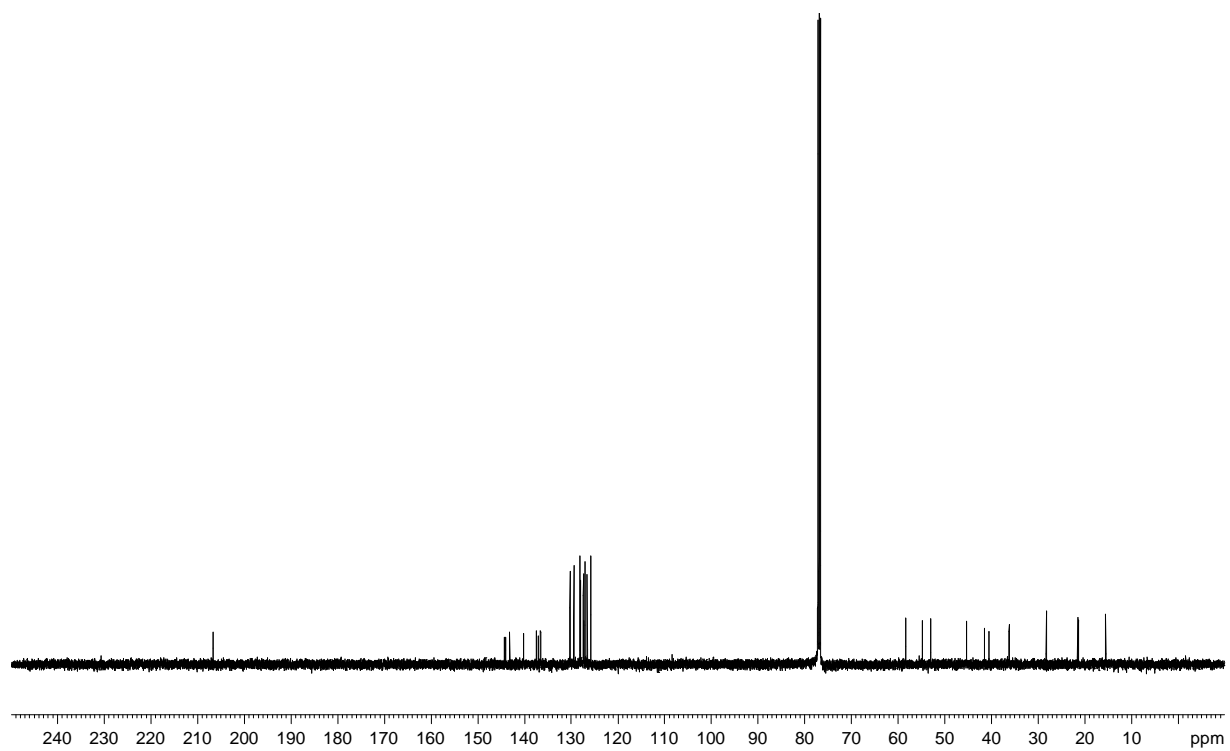

Wang *et al.*

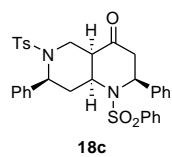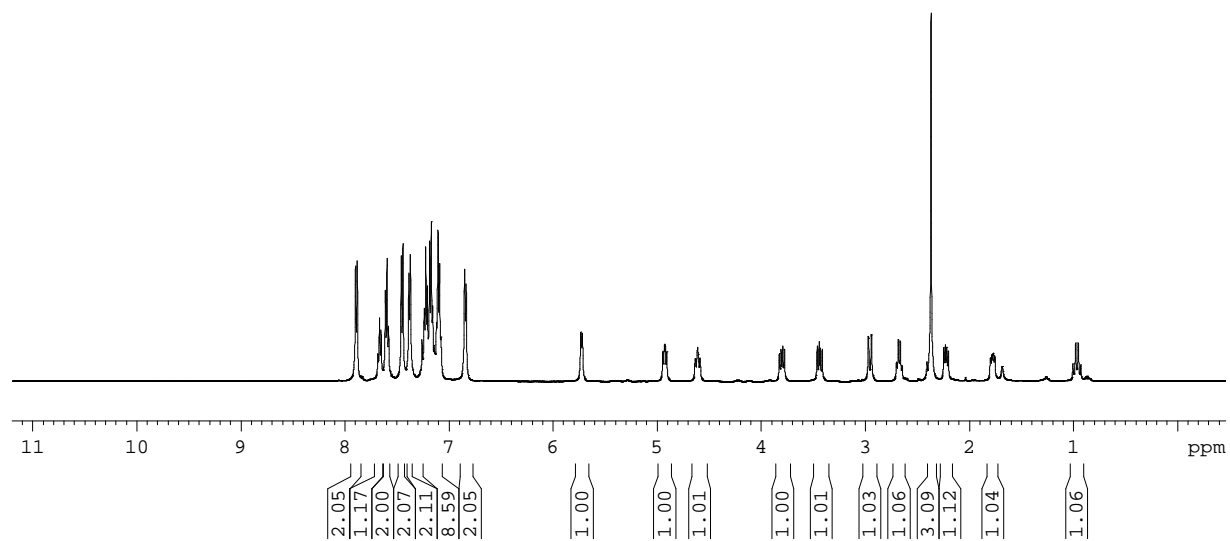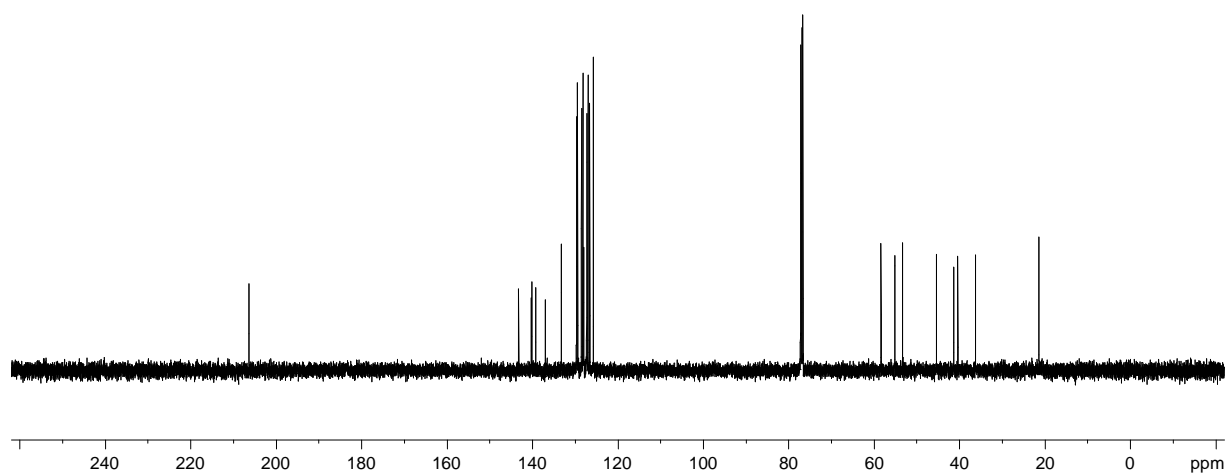

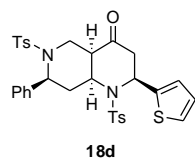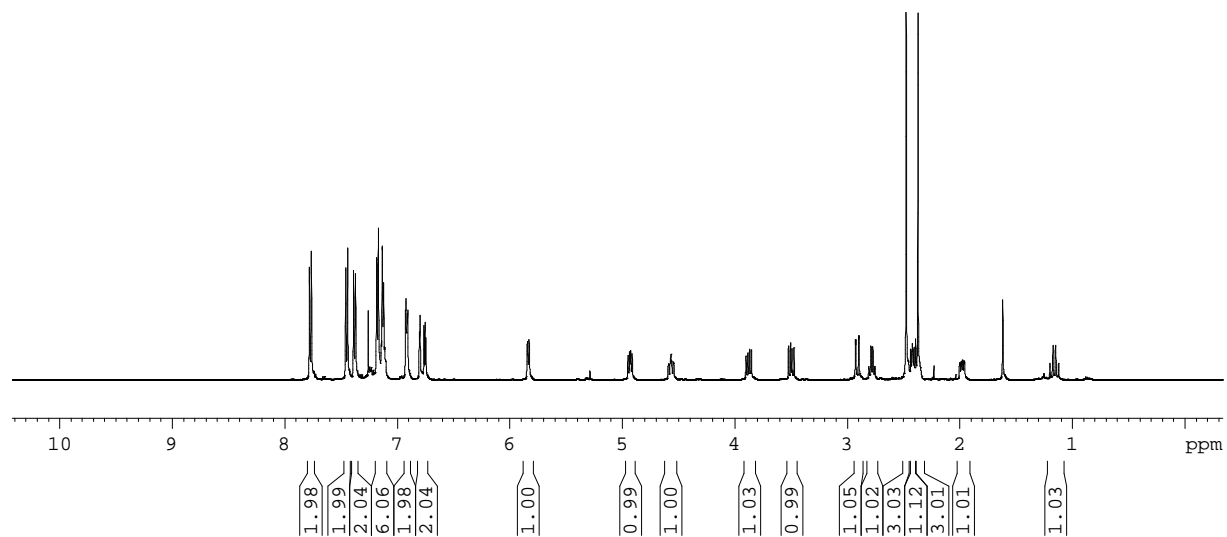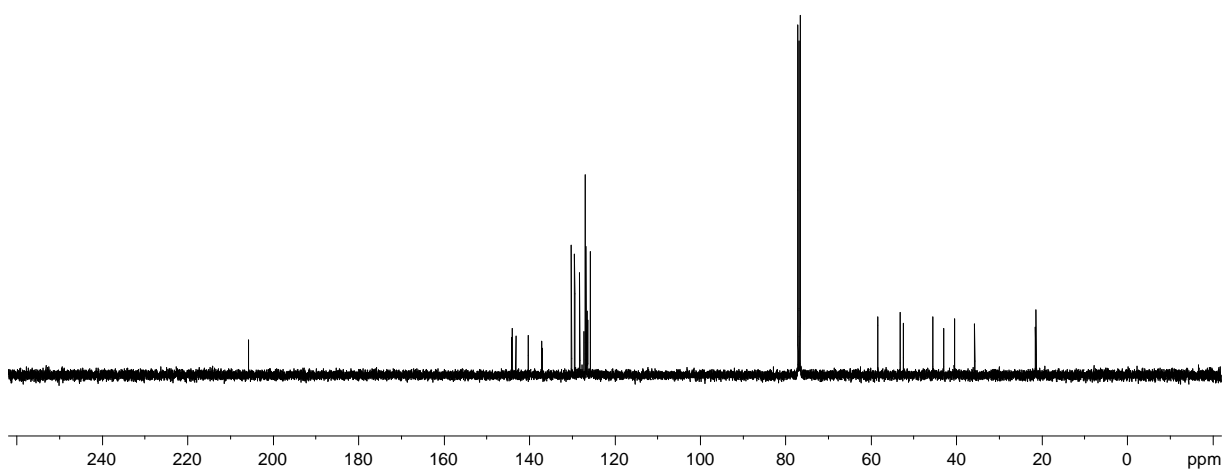

Wang *et al.*

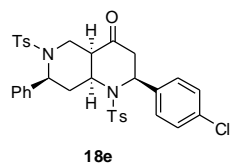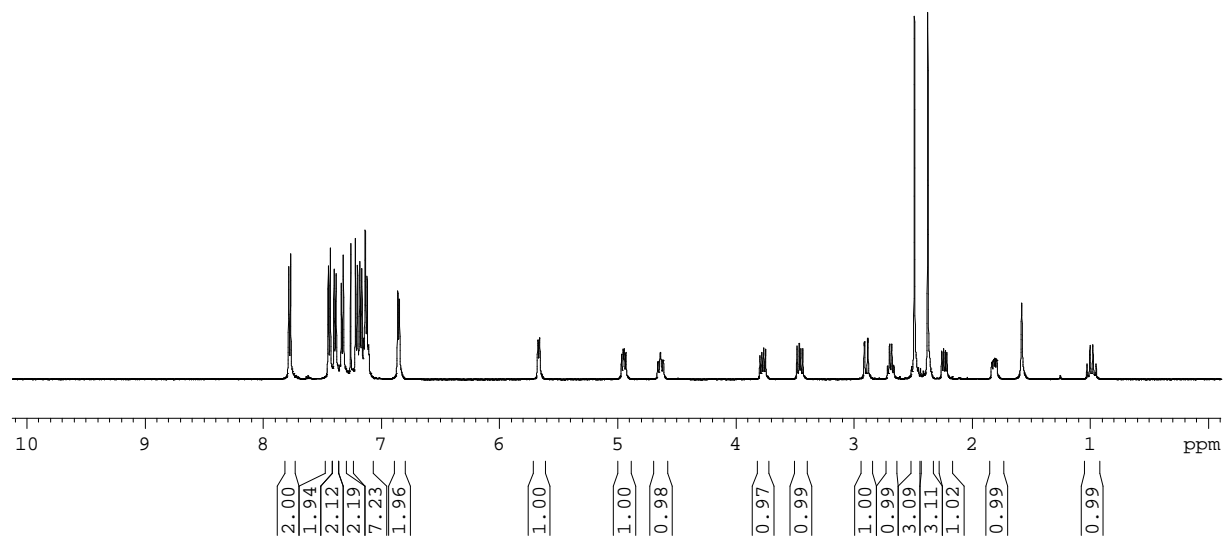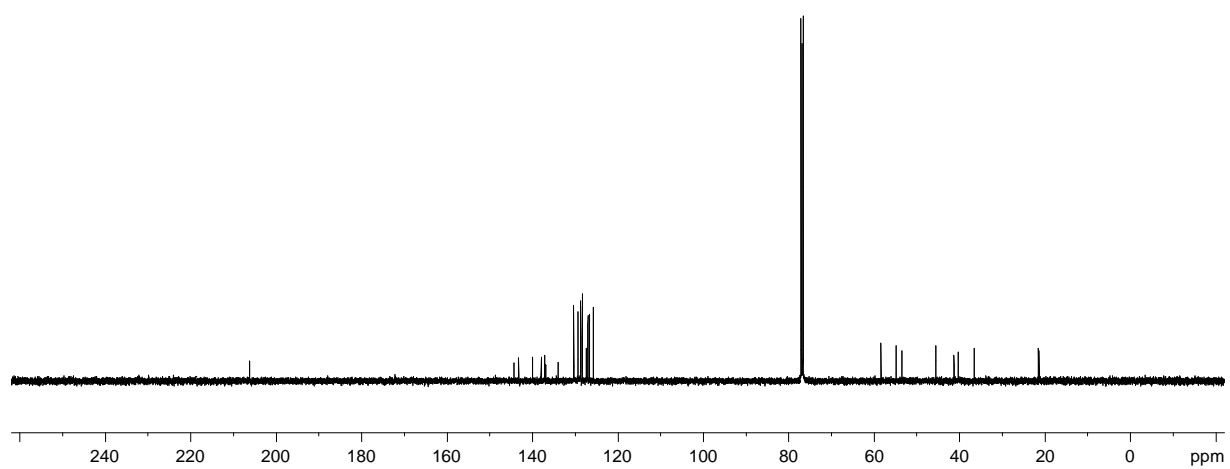

Wang *et al.*

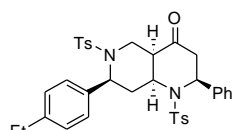

18f

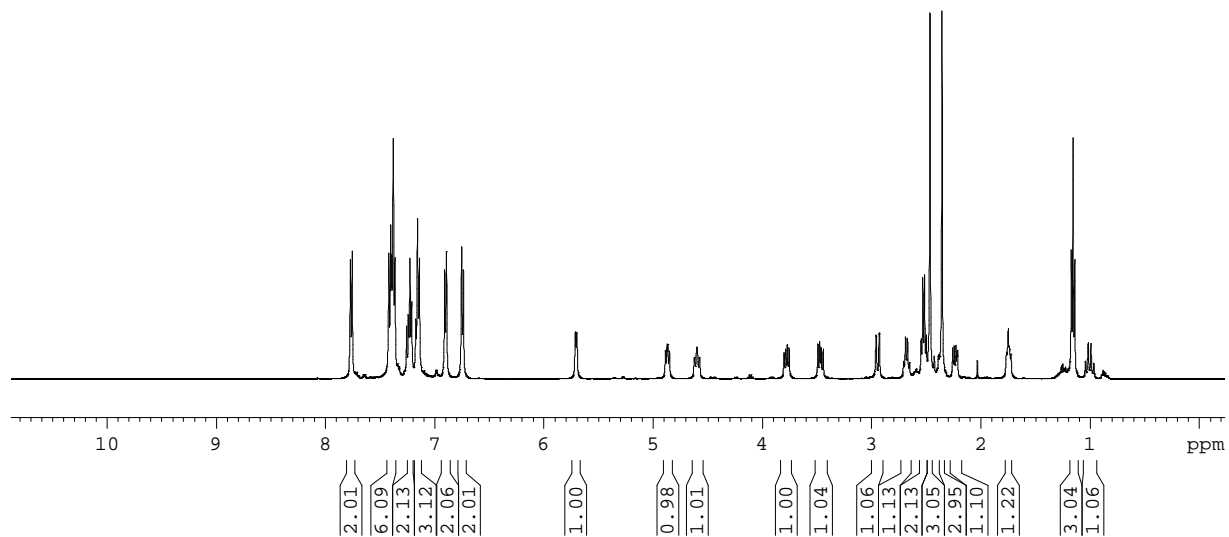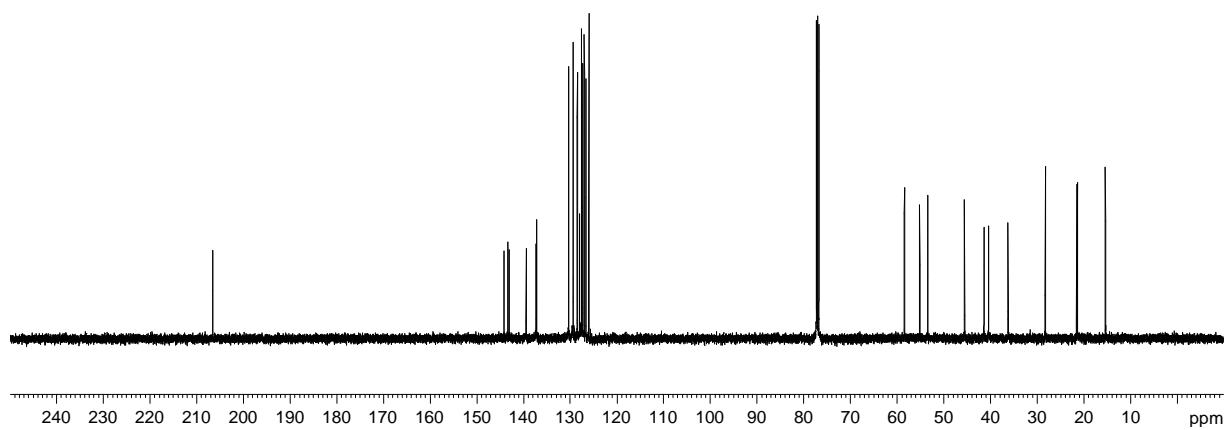

Wang *et al.*

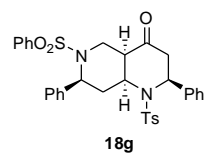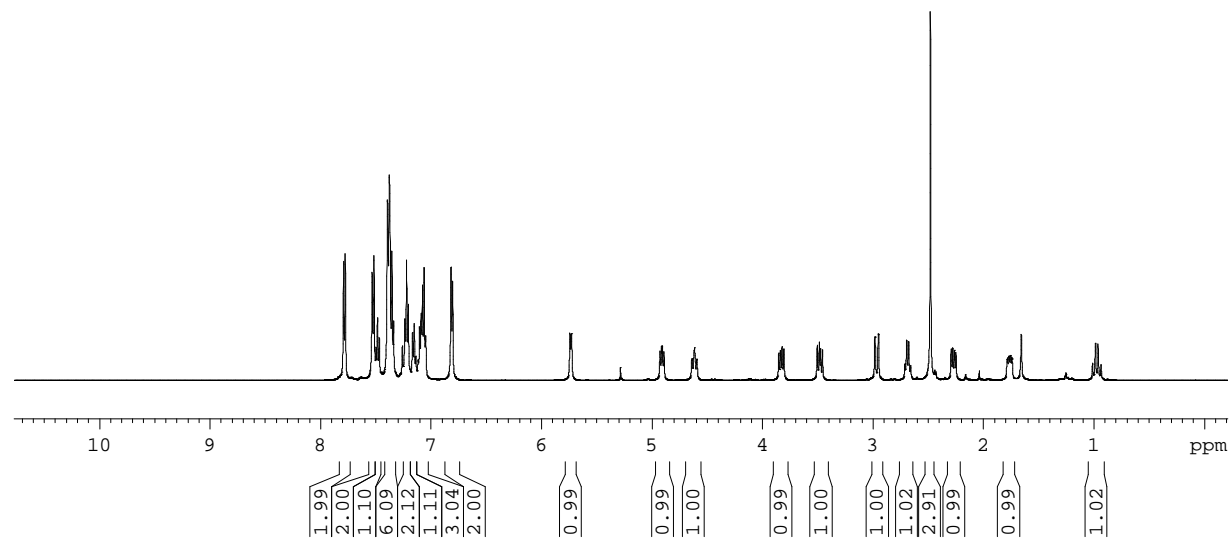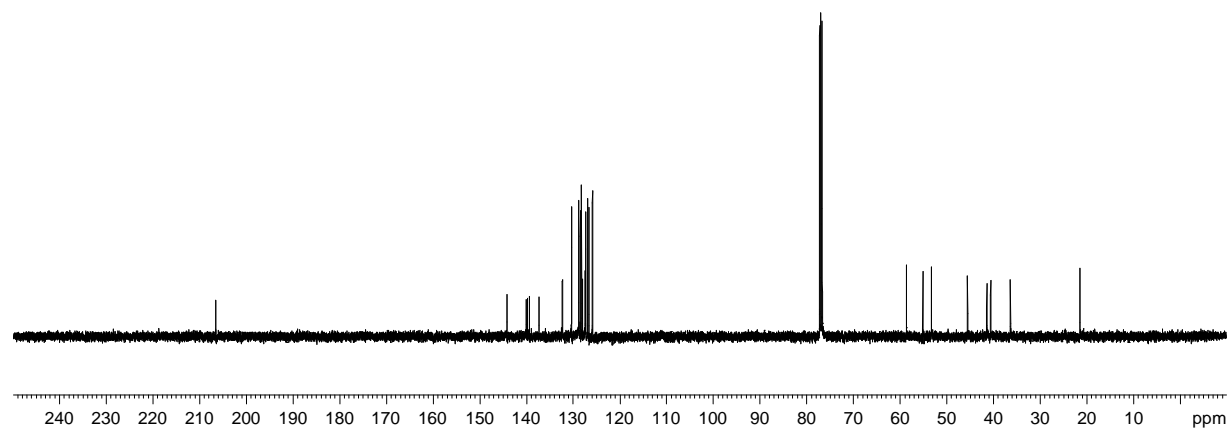



Wang *et al.*

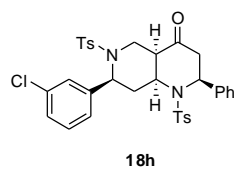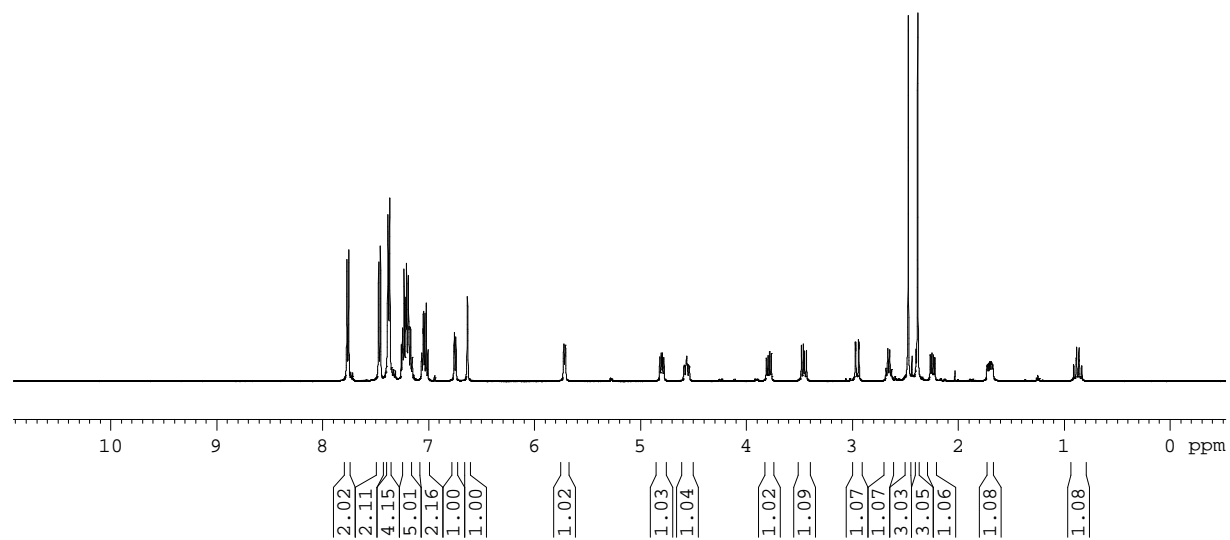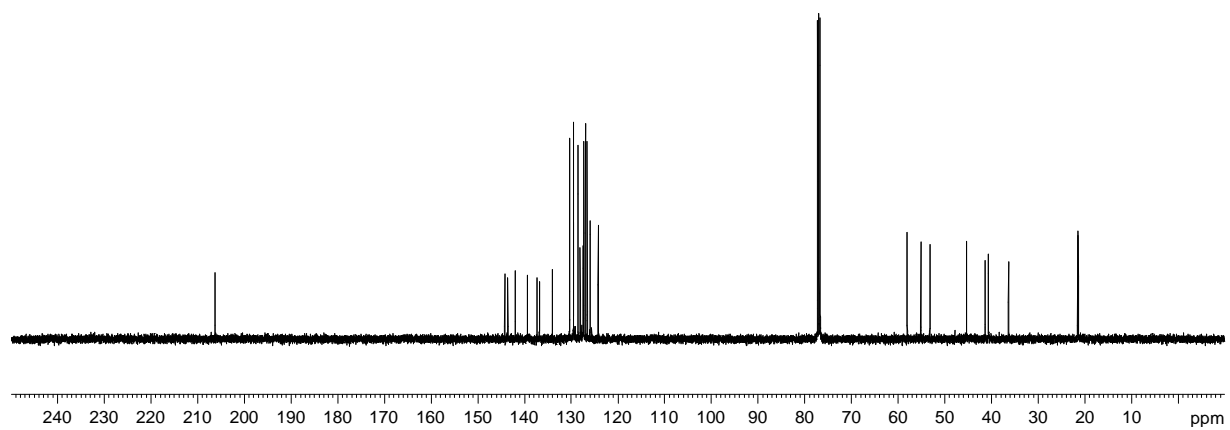

Wang *et al.*

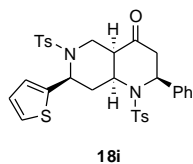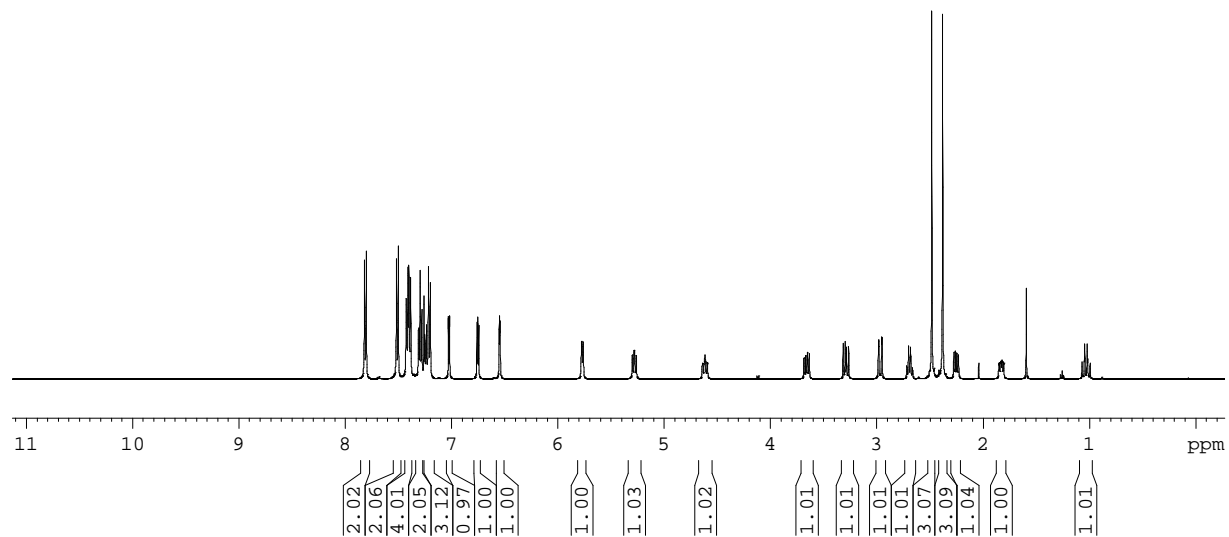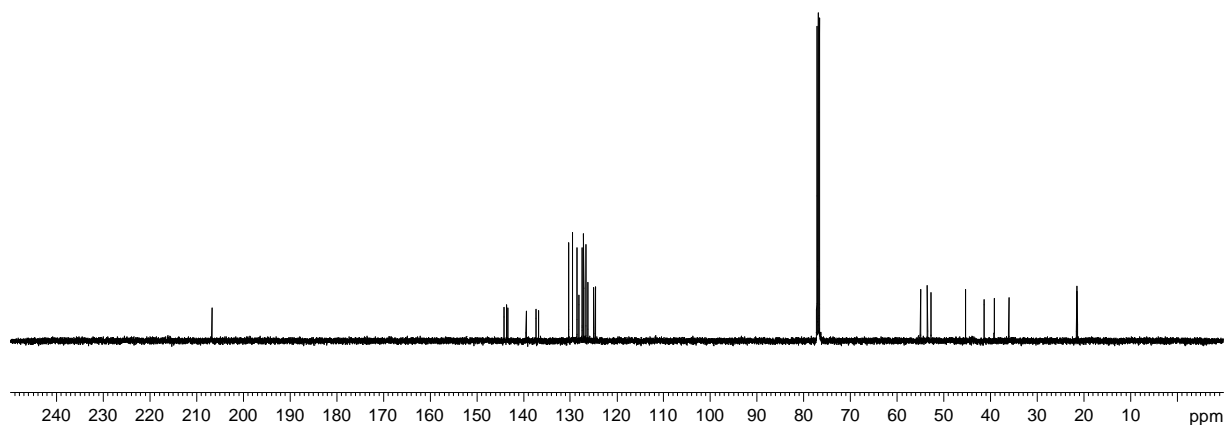

Wang *et al.*

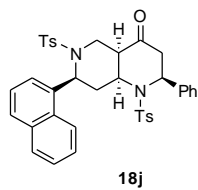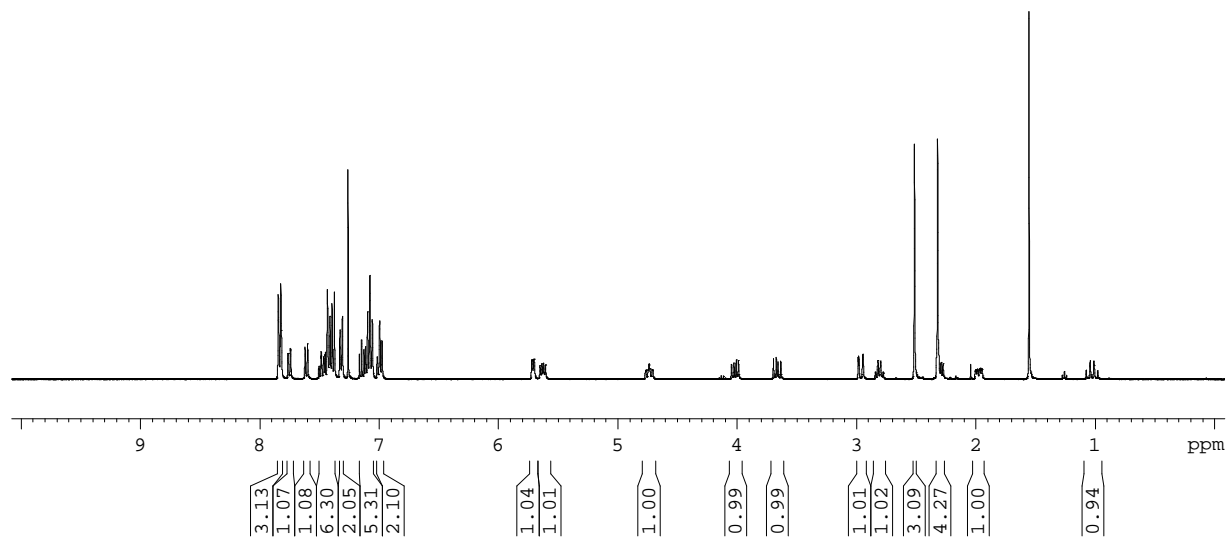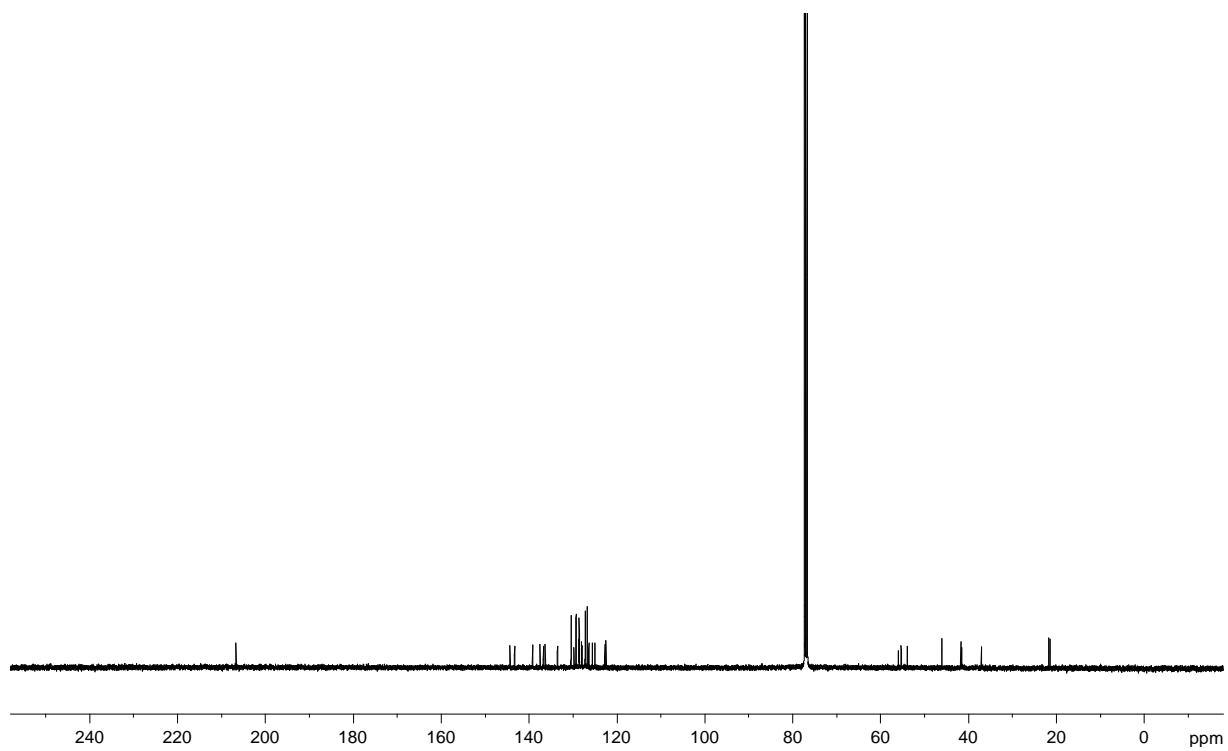

Supplement: NIHMS252341-supplement-Supporting_Information.pdf [file NIHMS252341-supplement-Supporting_Information.pdf]
